# Supplementary material for: Proteomic Analysis Reveals That Mitochondria Dominate the Hippocampal Hypoxic Response in Mice
Source: MDPI journal article supplement (doi:10.3390/ijms232214094), 2022-11-15
Supplement: s1 [file s1]

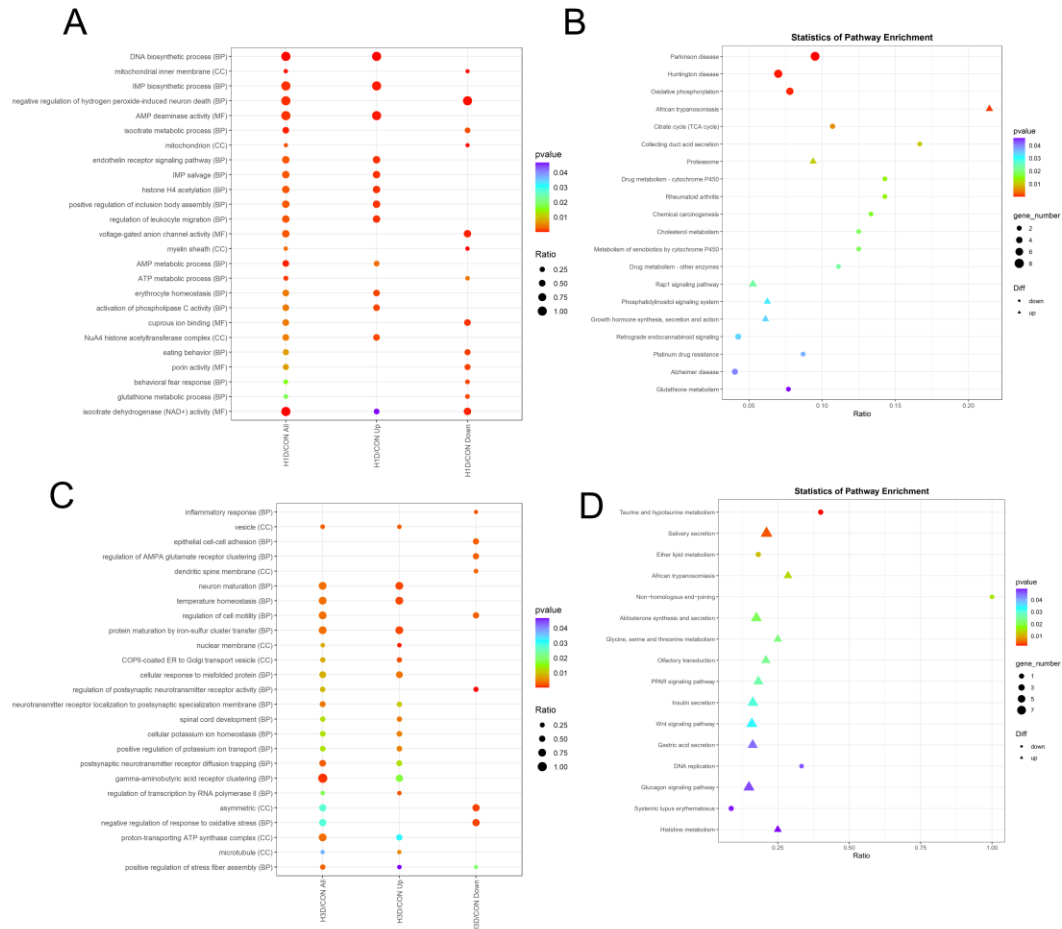

Supplementary Figure S1. (A, B) GO graphs classified by cellular component, molecular function, and biological process (A) and KEGG pathway (B) in H1D mice compared with CON mice. (C, D) GO graphs classified by cellular component, molecular function, and biological process (C) and KEGG pathway (D) in H3D mice compared with CON mice.

A

## Biological processes

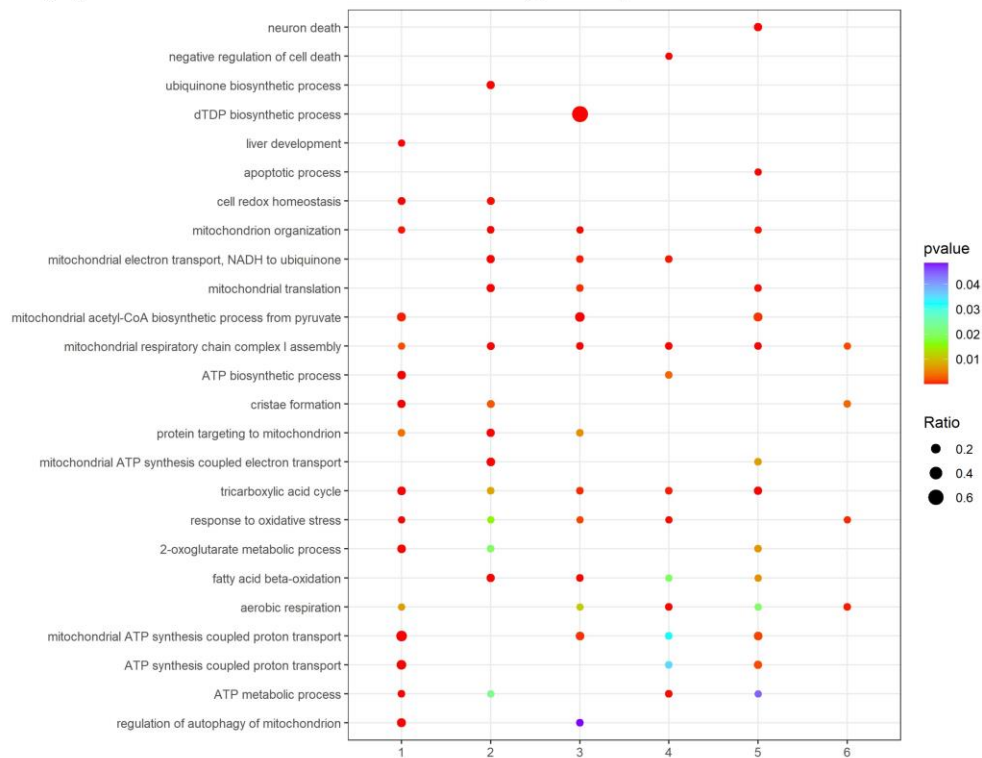

B

## Molecular function

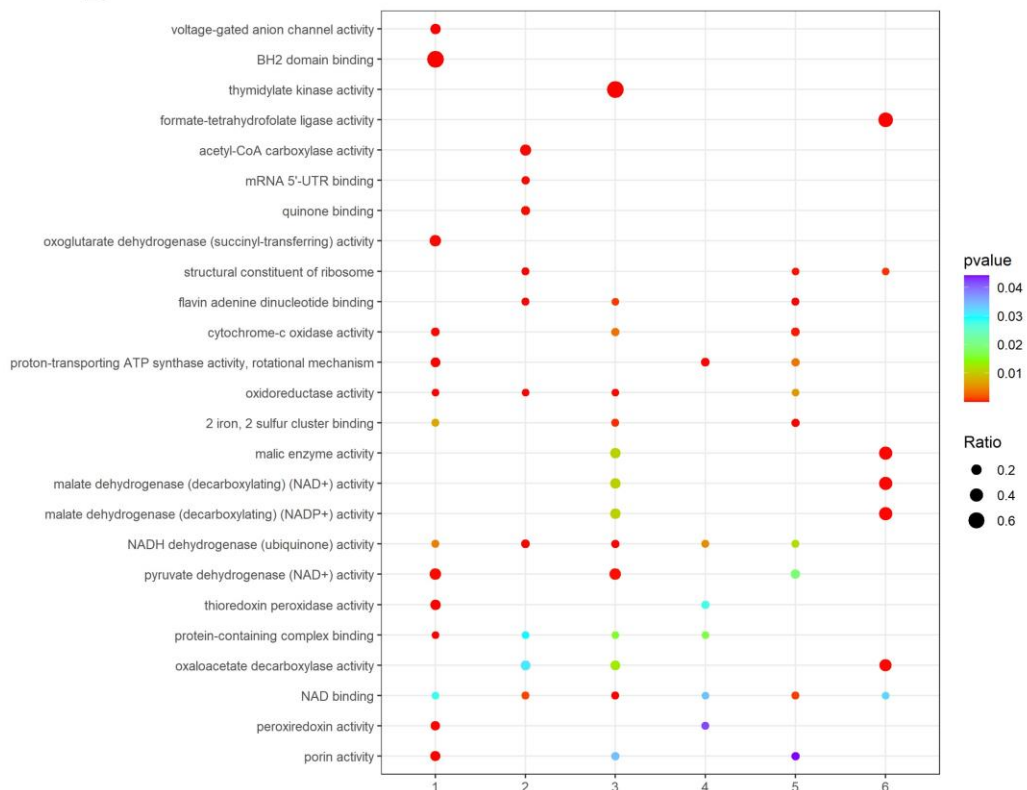

Supplementary Figure S2. (A, B) Top 20 GO items screened by biological process (A) and molecular function (B) in mitochondria.
