# Supplementary material for: Proteomic Analysis Reveals That Mitochondria Dominate the Hippocampal Hypoxic Response in Mice
Source: Int J Mol Sci. 2022 Nov 15;23(22):14094. doi: 10.3390/ijms232214094 (PMC9697535; doi:10.3390/ijms232214094)
Supplement: Supplementary file 1 [file ijms-23-14094-s001.zip]

Archive with 4 entries (4 files):
- Supplementary figures-ijms-1934583.pdf
- Table S1.xlsx
- Table S2.xlsx
- Table S3.xlsx
