# Supplementary material for: Proteomic Analysis Reveals That Mitochondria Dominate the Hippocampal Hypoxic Response in Mice
Source: Int J Mol Sci. 2022 Nov 15;23(22):14094. doi: 10.3390/ijms232214094 (PMC9697535; doi:10.3390/ijms232214094)
Supplement: Supplementary file 1 [file ijms-23-14094-s001.zip › Table S1.xlsx]

## Sheet: Sheet1
The protein list of original proteomic data
ID	Accession	Gene Name	Description	CON-1	CON-2	CON-3	H1D-1	H1D-2	H1D-3	H3D-1	H3D-2	H3D-3	Imputation(CON)	Imputation(H1D)	Imputation(H3D)	Keep(CON)	Keep(H1D)	Keep(H3D)	FC(H1D_CON)	pValue(H1D_CON)	Sig(H1D_CON)	FC(H3D_CON)	pValue(H3D_CON)	Sig(H3D_CON)	FC(H3D_H1D)	pValue(H3D_H1D)	Sig(H3D_H1D)	GO_CC	GO_MF	GO_BP	KEGG
A0A1L1SS47_MOUSE	A0A1L1SS47	Cnot10	CCR4-NOT transcription complex subunit 10	34.5	43.9	49.1	41.4	42.2	44.1	31.4	40.9	29.4	42.5	42.5667	33.9	42.5	42.5667	33.9	1.00157	0.988498	0	0.797647	0.196378	0	0.796398	0.075724	0	GO:0030014,CCR4-NOT complex;GO:0005737,cytoplasm;GO:0005634,nucleus		GO:0031047,gene silencing by RNA;GO:0006402,mRNA catabolic process;GO:0017148,negative regulation of translation	mmu:78893,path:mmu03018,RNA degradation
PDLI1_MOUSE	O70400	Pdlim1	PDZ and LIM domain protein 1	274.2	335.2	289.2	287	306.8	283.5	266.4	288.7	265.5	299.533	292.433	273.533	299.533	292.433	273.533	0.976296	0.737189	0	0.913198	0.260584	0	0.93537	0.146163	0	GO:0005856,cytoskeleton;GO:0015629,actin cytoskeleton;GO:0005912,adherens junction;GO:0005737,cytoplasm;GO:0031941,filamentous actin;GO:0001725,stress fiber;GO:0005667,transcription regulator complex;GO:0030018,Z disc	GO:0003779,actin binding;GO:0046872,metal ion binding;GO:0051371,muscle alpha-actinin binding;GO:0003713,transcription coactivator activity	GO:0030036,actin cytoskeleton organization;GO:0030950,establishment or maintenance of actin cytoskeleton polarity;GO:0010761,fibroblast migration;GO:0007507,heart development;GO:0030011,maintenance of cell polarity;GO:0061061,muscle structure development;GO:0006357,regulation of transcription by RNA polymerase II;GO:0001666,response to hypoxia;GO:0043149,stress fiber assembly
CDC42_MOUSE	P60766	Cdc42	Cell division control protein 42 homolog	492.3	441.7	485	504.9	500.8	520.1	460.7	547	470	473	508.6	492.567	473	508.6	492.567	1.07526	0.102131	0	1.04137	0.56908	0	0.968476	0.597195	0	GO:0045177,apical part of cell;GO:0005938,cell cortex;GO:0071944,cell periphery;GO:0042995,cell projection;GO:0005911,cell-cell junction;GO:0005813,centrosome;GO:0005737,cytoplasm;GO:0036464,cytoplasmic ribonucleoprotein granule;GO:0031410,cytoplasmic vesicle;GO:0005856,cytoskeleton;GO:0005829,cytosol;GO:0043197,dendritic spine;GO:0030175,filopodium;GO:0000139,Golgi membrane;GO:0017119,Golgi tran…	GO:0034191,apolipoprotein A-I receptor binding;GO:0032427,GBD domain binding;GO:0005525,GTP binding;GO:0030742,GTP-dependent protein binding;GO:0003924,GTPase activity;GO:0042802,identical protein binding;GO:0031435,mitogen-activated protein kinase kinase kinase binding;GO:0019901,protein kinase binding;GO:0031996,thioesterase binding;GO:0061630,ubiquitin protein ligase activity	GO:0030036,actin cytoskeleton organization;GO:0090135,actin filament branching;GO:0007015,actin filament organization;GO:0034332,adherens junction organization;GO:0003161,cardiac conduction system development;GO:0032488,Cdc42 protein signal transduction;GO:0034329,cell junction assembly;GO:0016477,cell migration;GO:0030031,cell projection assembly;GO:0098609,cell-cell adhesion;GO:0034613,cellular…	mmu:12540,path:mmu04014,Ras signaling pathway;mmu:12540,path:mmu04015,Rap1 signaling pathway;mmu:12540,path:mmu04010,MAPK signaling pathway;mmu:12540,path:mmu04370,VEGF signaling pathway;mmu:12540,path:mmu04144,Endocytosis;mmu:12540,path:mmu04510,Focal adhesion;mmu:12540,path:mmu04520,Adherens junction;mmu:12540,path:mmu04530,Tight junction;mmu:12540,path:mmu04810,Regulation of actin cytoskeleton…
S2544_MOUSE	Q8BGF9	Slc25a44	Solute carrier family 25 member 44	0	424.7	0	471.5	437.1	484.8	409.7	443.4	426	386.308	464.467	426.367	424.7	464.467	426.367	1.20232	0.035658	1	1.1037	0.154353	0	0.91797	0.091413	0	GO:0016021,integral component of membrane;GO:0031966,mitochondrial membrane;GO:0005739,mitochondrion	GO:0005347,ATP transmembrane transporter activity;GO:0015658,branched-chain amino acid transmembrane transporter activity	GO:0009083,branched-chain amino acid catabolic process;GO:0015803,branched-chain amino acid transport;GO:0120161,regulation of cold-induced thermogenesis
H15_MOUSE	P43276	H1-5	Histone H1.5	0	0	0	0	0	0	1291.6	1095	1287.5	268.321	370.579	1224.7			1224.7	1.3811	0.100158	0	4.56431	0.000281	1	3.30483	0.000202	1	GO:0000794,condensed nuclear chromosome;GO:0042025,host cell nucleus;GO:0000790,nuclear chromatin;GO:0005719,nuclear euchromatin;GO:0000786,nucleosome;GO:0005634,nucleus;GO:0005720,nuclear heterochromatin;GO:0000788,nuclear nucleosome;GO:0015629,actin cytoskeleton;GO:0005794,Golgi apparatus;GO:0016604,nuclear body;GO:0005654,nucleoplasm;GO:0017053,transcription repressor complex;GO:0009986,cell s…	GO:0003677,DNA binding;GO:0003690,double-stranded DNA binding;GO:0031492,nucleosomal DNA binding;GO:0043531,ADP binding;GO:0016208,AMP binding;GO:0005524,ATP binding;GO:0005509,calcium ion binding;GO:0032564,dATP binding;GO:0005525,GTP binding;GO:0000166,nucleotide binding;GO:0003680,AT DNA binding;GO:0031490,chromatin DNA binding;GO:0008201,heparin binding;GO:0042826,histone deacetylase binding	GO:0007339,binding of sperm to zona pellucida;GO:0030154,cell differentiation;GO:0030261,chromosome condensation;GO:0030317,flagellated sperm motility;GO:0007275,multicellular organism development;GO:0031936,negative regulation of chromatin silencing;GO:0045910,negative regulation of DNA recombination;GO:0006334,nucleosome assembly;GO:0016584,nucleosome positioning;GO:0006355,regulation of transc…
RBM15_MOUSE	Q0VBL3	Rbm15	RNA-binding protein 15	45.8	38.9	49.4	37.3	40.2	40.6	39.1	44.6	40	44.7	39.3667	41.2333	44.7	39.3667	41.2333	0.880686	0.176275	0	0.922446	0.380468	0	1.04742	0.402532	0	GO:0031965,nuclear membrane;GO:0016607,nuclear speck;GO:0005654,nucleoplasm;GO:0005634,nucleus;GO:0036396,RNA N6-methyladenosine methyltransferase complex	GO:0003729,mRNA binding;GO:0003723,RNA binding	GO:0001569,branching involved in blood vessel morphogenesis;GO:0009048,dosage compensation by inactivation of X chromosome;GO:0045638,negative regulation of myeloid cell differentiation;GO:0000122,negative regulation of transcription by RNA polymerase II;GO:0060674,placenta blood vessel development;GO:0007221,positive regulation of transcription of Notch receptor target;GO:0000381,regulation of a…
MVD1_MOUSE	Q99JF5	Mvd	Diphosphomevalonate decarboxylase	0	1046.3	0	1145.1	1159.6	1109.7	1039.2	1047.3	979.3	531.851	1138.13	1021.93	1046.3	1138.13	1021.93	2.13995	0.078309	0	1.92146	0.130522	0	0.897903	0.01118	0	GO:0005829,cytosol;GO:0005782,peroxisomal matrix;GO:0005777,peroxisome	GO:0005524,ATP binding;GO:0004163,diphosphomevalonate decarboxylase activity;GO:0030544,Hsp70 protein binding;GO:0042803,protein homodimerization activity	GO:0006695,cholesterol biosynthetic process;GO:0019287,isopentenyl diphosphate biosynthetic process;GO:0008299,isoprenoid biosynthetic process;GO:0008284,positive regulation of cell population proliferation	mmu:192156,path:mmu00900,Terpenoid backbone biosynthesis
NUDC2_MOUSE	Q9CQ48	Nudcd2	NudC domain-containing protein 2	0	637.8	0	721.3	1368.7	1392.1	1299.4	1330.4	1290.2	504.512	1160.7	1306.67	637.8	1160.7	1306.67	2.30064	0.046166	1	2.58996	0.0003	1	1.12576	0.543549	0	GO:0000777,condensed chromosome kinetochore;GO:0005737,cytoplasm;GO:0005829,cytosol;GO:0045171,intercellular bridge;GO:0015630,microtubule cytoskeleton;GO:0005815,microtubule organizing center;GO:0072686,mitotic spindle;GO:0000922,spindle pole	GO:0051082,unfolded protein binding	GO:0032502,developmental process;GO:0006457,protein folding
A0A1D5RLN6_MOUSE	A0A1D5RLN6	2900026A02Rik	RIKEN cDNA 2900026A02 gene	238.8	190.5	178.2	167	212	193.4	180.5	126	156.4	202.5	190.8	154.3	202.5	190.8	154.3	0.942222	0.632534	0	0.761975	0.118359	0	0.8087	0.149161	0
CADH8_MOUSE	P97291	Cdh8	Cadherin-8	339.4	358.4	311	326.9	333.9	284	306.5	265.3	343.7	336.267	314.933	305.167	336.267	314.933	305.167	0.936558	0.363205	0	0.907514	0.305698	0	0.968988	0.740364	0	GO:0016021,integral component of membrane;GO:0005886,plasma membrane;GO:0005912,adherens junction;GO:0043679,axon terminus;GO:0016342,catenin complex;GO:0098978,glutamatergic synapse;GO:0043083,synaptic cleft;GO:0097060,synaptic membrane	GO:0005509,calcium ion binding;GO:0045296,cadherin binding;GO:0042802,identical protein binding	GO:0007156,homophilic cell adhesion via plasma membrane adhesion molecules;GO:0034332,adherens junction organization;GO:0016339,calcium-dependent cell-cell adhesion via plasma membrane cell adhesion molecules;GO:0000902,cell morphogenesis;GO:0044331,cell-cell adhesion mediated by cadherin;GO:0098742,cell-cell adhesion via plasma-membrane adhesion molecules;GO:0007043,cell-cell junction assembly;G…
OXA1L_MOUSE	Q8BGA9	Oxa1l	Mitochondrial inner membrane protein OXA1L	280.2	259.4	312.5	302.5	238.1	269	241.3	301.8	283.6	284.033	269.867	275.567	284.033	269.867	275.567	0.950123	0.589347	0	0.970191	0.738542	0	1.02112	0.836125	0	GO:0016021,integral component of membrane;GO:0031305,integral component of mitochondrial inner membrane;GO:0032592,integral component of mitochondrial membrane;GO:0005743,mitochondrial inner membrane;GO:0031966,mitochondrial membrane;GO:0005739,mitochondrion;GO:0032991,protein-containing complex	GO:0032977,membrane insertase activity;GO:0097177,mitochondrial ribosome binding;GO:0042803,protein homodimerization activity	GO:0009060,aerobic respiration;GO:0033617,mitochondrial cytochrome c oxidase assembly;GO:0033615,mitochondrial proton-transporting ATP synthase complex assembly;GO:0032981,mitochondrial respiratory chain complex I assembly;GO:0032780,negative regulation of ATPase activity;GO:0051354,negative regulation of oxidoreductase activity;GO:0051205,protein insertion into membrane;GO:0032979,protein insert…	mmu:69089,path:mmu03060,Protein export
PTK7_MOUSE	Q8BKG3	Ptk7	Inactive tyrosine-protein kinase 7	430	444.1	426.7	501.3	439.3	412.6	404.1	448.6	430.8	433.6	451.067	427.833	433.6	451.067	427.833	1.04028	0.550248	0	0.9867	0.701306	0	0.948492	0.471944	0	GO:0005911,cell-cell junction;GO:0016021,integral component of membrane;GO:0016020,membrane;GO:0005886,plasma membrane		GO:0031532,actin cytoskeleton reorganization;GO:0003401,axis elongation;GO:0007155,cell adhesion;GO:0016477,cell migration;GO:0071300,cellular response to retinoic acid;GO:0090103,cochlea morphogenesis;GO:0060026,convergent extension;GO:0060976,coronary vasculature development;GO:0045198,establishment of epithelial cell apical/basal polarity;GO:0001736,establishment of planar polarity;GO:0007507,…
GAB1_MOUSE	Q9QYY0	Gab1	GRB2-associated-binding protein 1	195.2	187.6	211.9	226.3	199.6	196.8	173.8	203.4	177.5	198.233	207.567	184.9	198.233	207.567	184.9	1.04708	0.474192	0	0.932739	0.320095	0	0.890798	0.161872	0	GO:0005911,cell-cell junction;GO:0005737,cytoplasm;GO:0005829,cytosol		GO:0031532,actin cytoskeleton reorganization;GO:0001525,angiogenesis;GO:0090668,endothelial cell chemotaxis to vascular endothelial growth factor;GO:0045766,positive regulation of angiogenesis;GO:0035728,response to hepatocyte growth factor;GO:0038084,vascular endothelial growth factor signaling pathway;GO:0007257,activation of JUN kinase activity;GO:0000187,activation of MAPK activity;GO:0035924…	mmu:14388,path:mmu04014,Ras signaling pathway;mmu:14388,path:mmu04012,ErbB signaling pathway;mmu:14388,path:mmu04072,Phospholipase D signaling pathway;mmu:14388,path:mmu04722,Neurotrophin signaling pathway;mmu:14388,path:mmu05205,Proteoglycans in cancer;mmu:14388,path:mmu05225,Hepatocellular carcinoma;mmu:14388,path:mmu05226,Gastric cancer;mmu:14388,path:mmu05211,Renal cell carcinoma;mmu:14388,pa…
MTMRD_MOUSE	E9PXF8	Sbf2	Myotubularin-related protein 13	47	44	46.5	39.9	43.9	37.9	38.4	37	34.4	45.8333	40.5667	36.6	45.8333	40.5667	36.6	0.885091	0.057429	0	0.798545	0.003489	-1	0.902219	0.134342	0	GO:0030424,axon;GO:0010008,endosome membrane;GO:0016020,membrane;GO:0048471,perinuclear region of cytoplasm;GO:0005774,vacuolar membrane	GO:0019208,phosphatase regulator activity;GO:0019902,phosphatase binding;GO:0035091,phosphatidylinositol binding;GO:0017112,Rab guanyl-nucleotide exchange factor activity	GO:0043087,regulation of GTPase activity;GO:0006914,autophagy
ELP6_MOUSE	Q8BK75	Elp6	Elongator complex protein 6	0	682.6	0	802.8	782.5	822.3	625	692.1	598.1	481.819	802.533	638.4	682.6	802.533	638.4	1.66563	0.03404	1	1.32498	0.208413	0	0.795481	0.005575	-1	GO:0033588,Elongator holoenzyme complex;GO:0005829,cytosol;GO:0005634,nucleus		GO:0002098,tRNA wobble uridine modification;GO:0030335,positive regulation of cell migration
F8WGX5_MOUSE	F8WGX5	Dmxl1	DmX-like protein 1	0	0	0	0	320.9	339.9	301.9	322	317.1	161.513	299.766	313.667		330.4	313.667	1.85598	0.030567	1	1.94205	0.006396	1	1.04637	0.683702	0	GO:0043291,RAVE complex		GO:0007035,vacuolar acidification
CC018_MOUSE	Q8BGK9		Uncharacterized protein C3orf18 homolog	107.2	143.7	107.8	130	99.8	93.1	98.9	124.2	114.2	119.567	107.633	112.433	119.567	107.633	112.433	0.900195	0.511165	0	0.94034	0.640298	0	1.0446	0.74059	0	GO:0016021,integral component of membrane
RS17_MOUSE	P63276	Rps17	40S ribosomal protein S17	0	399.9	0	440.7	425.4	484.7	392.4	428.8	379	314.456	450.267	400.067	399.9	450.267	400.067	1.43189	0.043737	1	1.27225	0.134113	0	0.888511	0.096271	0	GO:0022627,cytosolic small ribosomal subunit;GO:0045202,synapse	GO:0003735,structural constituent of ribosome	GO:0034101,erythrocyte homeostasis;GO:0042274,ribosomal small subunit biogenesis;GO:0006364,rRNA processing;GO:0006412,translation	mmu:20068,path:mmu03010,Ribosome
A0A1W2P7A1_MOUSE	A0A1W2P7A1	Rps12	40S ribosomal protein S12	1021.6	2530.2	1058.1	1408.5	3275.8	2028.8	3584.6	2783.4	3451.9	1536.63	2237.7	3273.3	1536.63	2237.7	3273.3	1.45623	0.397393	0	2.13018	0.035275	1	1.4628	0.160741	0	GO:0022627,cytosolic small ribosomal subunit;GO:0005794,Golgi apparatus;GO:0005840,ribosome;GO:0005829,cytosol;GO:0022625,cytosolic large ribosomal subunit;GO:0043231,intracellular membrane-bounded organelle	GO:0003735,structural constituent of ribosome	GO:0006412,translation	mmu:20042,path:mmu03010,Ribosome
E9PXB0_MOUSE	E9PXB0	Pnpla8	Calcium-independent phospholipase A2-gamma	244.7	523	290.3	284.1	293.3	243.5	245.8	302	352.2	352.667	273.633	300	352.667	273.633	300	0.775898	0.4176	0	0.850662	0.595697	0	1.09636	0.485283	0	GO:0016021,integral component of membrane;GO:0005789,endoplasmic reticulum membrane;GO:0016020,membrane;GO:0031966,mitochondrial membrane;GO:0005739,mitochondrion;GO:0005778,peroxisomal membrane;GO:0005777,peroxisome	GO:0016787,hydrolase activity;GO:0047499,calcium-independent phospholipase A2 activity;GO:0004622,lysophospholipase activity;GO:0102545,phosphatidyl phospholipase B activity;GO:0004620,phospholipase activity	GO:0016042,lipid catabolic process;GO:0006629,lipid metabolic process;GO:0019369,arachidonic acid metabolic process;GO:0050482,arachidonic acid secretion;GO:0008219,cell death;GO:0006631,fatty acid metabolic process;GO:0043651,linoleic acid metabolic process;GO:0055088,lipid homeostasis;GO:0034638,phosphatidylcholine catabolic process;GO:0046338,phosphatidylethanolamine catabolic process;GO:00015…
FDX2_MOUSE	Q9CPW2	Fdx2	Ferredoxin-2, mitochondrial	0	0	0	0	0	0	0	0	176	210.619	242.966	286.229			176	1.15358	0.459095	0	1.35899	0.301969	0	1.17806	0.522824	0	GO:0005759,mitochondrial matrix;GO:0005739,mitochondrion	GO:0051537,2 iron;GO:0009055,electron transfer activity;GO:0046872,metal ion binding
Q3UWL8_MOUSE	Q3UWL8	Pfdn4	Prefoldin subunit 4	0	0	0	0	259.2	270.5	223.2	264.3	249.3	266.531	331.396	245.6		264.85	245.6	1.24337	0.57396	0	0.921469	0.814257	0	0.741108	0.273802	0	GO:0005737,cytoplasm;GO:0005739,mitochondrion;GO:0005634,nucleus;GO:0016272,prefoldin complex	GO:0051082,unfolded protein binding	GO:0006457,protein folding
AFAM_MOUSE	O89020	Afm	Afamin	0	0	0	0	0	0	77.8	99.3	92.8	273.607	314.859	89.9667			89.9667	1.15077	0.579713	0	0.328817	0.023722	-1	0.285736	0.008056	-1	GO:0005737,cytoplasm;GO:0005615,extracellular space	GO:0005504,fatty acid binding;GO:0008431,vitamin E binding;GO:0008270,zinc ion binding	GO:0050821,protein stabilization;GO:0071693,protein transport within extracellular region;GO:0051180,vitamin transport
RIMS3_MOUSE	Q80U57	Rims3	Regulating synaptic membrane exocytosis protein 3	0	0	0	0	0	0	0	0	375.2	178.078	335.045	261.435			375.2	1.88145	0.185039	0	1.46809	0.25205	0	0.780298	0.543937	0	GO:0048788,cytoskeleton of presynaptic active zone;GO:0098978,glutamatergic synapse;GO:0099524,postsynaptic cytosol;GO:0098831,presynaptic active zone cytoplasmic component;GO:0042734,presynaptic membrane;GO:0045202,synapse	GO:0044325,ion channel binding;GO:0017137,Rab GTPase binding	GO:0048791,calcium ion-regulated exocytosis of neurotransmitter;GO:0017156,calcium-ion regulated exocytosis;GO:0050806,positive regulation of synaptic transmission;GO:0042391,regulation of membrane potential;GO:0050807,regulation of synapse organization;GO:0048167,regulation of synaptic plasticity;GO:2000300,regulation of synaptic vesicle exocytosis
HOOK1_MOUSE	Q8BIL5	Hook1	Protein Hook homolog 1	0	0	0	0	0	0	0	0	236.3	307.355	346.721	248.219			236.3	1.12808	0.324577	0	0.807598	0.069244	0	0.715904	0.030488	-1	GO:0005813,centrosome;GO:0005737,cytoplasm;GO:0005829,cytosol;GO:0070695,FHF complex;GO:0030897,HOPS complex;GO:0005874,microtubule;GO:0015630,microtubule cytoskeleton	GO:0003779,actin binding;GO:0051959,dynein light intermediate chain binding;GO:0042802,identical protein binding;GO:0008017,microtubule binding	GO:0031122,cytoplasmic microtubule organization;GO:0030705,cytoskeleton-dependent intracellular transport;GO:0045022,early endosome to late endosome transport;GO:0007032,endosome organization;GO:0008333,endosome to lysosome transport;GO:0007030,Golgi organization;GO:0007040,lysosome organization;GO:1905198,manchette assembly;GO:0007275,multicellular organism development;GO:0015031,protein transpo…
A0A0G2JG40_MOUSE	A0A0G2JG40	Gna12	Guanine nucleotide-binding protein subunit alpha-12 (Fragment)	0	0	0	0	327.5	343.2	287.7	368	310.9	228.146	288.674	322.2		335.35	322.2	1.2653	0.321868	0	1.41226	0.055892	0	1.11614	0.55865	0	GO:0031526,brush border membrane;GO:0005737,cytoplasm;GO:0005834,heterotrimeric G-protein complex;GO:0016328,lateral plasma membrane	GO:0001664,G protein-coupled receptor binding;GO:0031683,G-protein beta/gamma-subunit complex binding;GO:0005525,GTP binding;GO:0003924,GTPase activity;GO:0031752,D5 dopamine receptor binding;GO:0046872,metal ion binding	GO:0007186,G protein-coupled receptor signaling pathway;GO:0007266,Rho protein signal transduction;GO:0007188,adenylate cyclase-modulating G protein-coupled receptor signaling pathway;GO:0030154,cell differentiation;GO:0042733,embryonic digit morphogenesis;GO:0001701,in utero embryonic development;GO:0035556,intracellular signal transduction;GO:0008360,regulation of cell shape;GO:0010762,regulati…	mmu:14673,path:mmu04010,MAPK signaling pathway;mmu:14673,path:mmu04072,Phospholipase D signaling pathway;mmu:14673,path:mmu04071,Sphingolipid signaling pathway;mmu:14673,path:mmu04022,cGMP-PKG signaling pathway;mmu:14673,path:mmu04810,Regulation of actin cytoskeleton;mmu:14673,path:mmu04928,Parathyroid hormone synthesis, secretion and action;mmu:14673,path:mmu04270,Vascular smooth muscle contract…
F6Z9T5_MOUSE	F6Z9T5	R3hdm2	R3H domain-containing protein 2 (Fragment)	329.6	336.1	354	354.7	323.8	404.7	300.1	326.3	274.4	339.9	361.067	300.267	339.9	361.067	300.267	1.06227	0.439318	0	0.883397	0.076126	0	0.83161	0.095065	0	GO:0005634,nucleus	GO:0003676,nucleic acid binding
A0A2R8VHX0_MOUSE	A0A2R8VHX0	Csad	Cysteine sulfinic acid decarboxylase	784.1	929.9	880.7	965.5	846.1	778.5	714.8	916.4	787.4	864.9	863.367	806.2	864.9	863.367	806.2	0.998227	0.983442	0	0.932131	0.465629	0	0.933786	0.516322	0	GO:0005737,cytoplasm	GO:0016831,carboxy-lyase activity;GO:0030170,pyridoxal phosphate binding;GO:0004068,aspartate 1-decarboxylase activity;GO:0004782,sulfinoalanine decarboxylase activity	GO:0019752,carboxylic acid metabolic process;GO:0019449,L-cysteine catabolic process to hypotaurine;GO:0019452,L-cysteine catabolic process to taurine;GO:0042412,taurine biosynthetic process;GO:0019530,taurine metabolic process	mmu:246277,path:mmu00430,Taurine and hypotaurine metabolism
MTUS2_MOUSE	Q3UHD3	Mtus2	Microtubule-associated tumor suppressor candidate 2 homolog	49.3	39.2	56	53.1	237	239.4	199.6	243.5	219.3	48.1667	176.5	220.8	48.1667	176.5	220.8	3.66436	0.106825	0	4.58408	0.000222	1	1.25099	0.520696	0	GO:0005737,cytoplasm;GO:0045171,intercellular bridge;GO:0005874,microtubule;GO:0005634,nucleus	GO:0008017,microtubule binding;GO:0042803,protein homodimerization activity
A2AER8_MOUSE	A2AER8	Pqbp1	Polyglutamine tract-binding protein 1 (Fragment)	189	204.2	222.3	222.6	185.6	177.9	163.5	196.6	179.3	205.167	195.367	179.8	205.167	195.367	179.8	0.952234	0.591453	0	0.876361	0.134826	0	0.920321	0.40619	0	GO:0005813,centrosome;GO:0097546,ciliary base;GO:0005929,cilium;GO:0005737,cytoplasm;GO:0010494,cytoplasmic stress granule;GO:0005829,cytosol;GO:0071598,neuronal ribonucleoprotein granule;GO:0016604,nuclear body;GO:0016607,nuclear speck;GO:0005634,nucleus	GO:0003690,double-stranded DNA binding;GO:0008022,protein C-terminus binding;GO:0043021,ribonucleoprotein complex binding	GO:0002218,activation of innate immune response;GO:0000380,alternative mRNA splicing;GO:0071360,cellular response to exogenous dsRNA;GO:0051607,defense response to virus;GO:0045087,innate immune response;GO:0031175,neuron projection development;GO:0002230,positive regulation of defense response to virus by host;GO:1902857,positive regulation of non-motile cilium assembly;GO:0032481,positive regul…	mmu:54633,path:mmu03040,Spliceosome
PKHA6_MOUSE	Q7TQG1	Plekha6	Pleckstrin homology domain-containing family A member 6	431.7	565	482.8	471.1	489.1	476.3	435	482	445.4	493.167	478.833	454.133	493.167	478.833	454.133	0.970936	0.73311	0	0.920852	0.39875	0	0.948416	0.180019	0
RAGP1_MOUSE	P46061	Rangap1	Ran GTPase-activating protein 1	151.4	163.6	143.8	162.4	161.9	135.9	126.3	162.3	149.7	152.933	153.4	146.1	152.933	153.4	146.1	1.00305	0.966618	0	0.955318	0.600115	0	0.952412	0.622486	0	GO:0016235,aggresome;GO:1904115,axon cytoplasm;GO:0000777,condensed chromosome kinetochore;GO:0005737,cytoplasm;GO:1990723,cytoplasmic periphery of the nuclear pore complex;GO:0005829,cytosol;GO:0030425,dendrite;GO:0043231,intracellular membrane-bounded organelle;GO:0072686,mitotic spindle;GO:0005635,nuclear envelope;GO:0031965,nuclear membrane;GO:0005643,nuclear pore;GO:0044614,nuclear pore cyto…	GO:0005096,GTPase activator activity;GO:0008536,Ran GTPase binding;GO:0003723,RNA binding;GO:0031625,ubiquitin protein ligase binding	GO:0007165,signal transduction;GO:0090630,activation of GTPase activity;GO:0071375,cellular response to peptide hormone stimulus;GO:1904117,cellular response to vasopressin;GO:0046826,negative regulation of protein export from nucleus;GO:0048678,response to axon injury	mmu:19387,path:mmu03013,RNA transport
PEA15_MOUSE	Q62048	Pea15	Astrocytic phosphoprotein PEA-15	0	0	0	0	882.3	840.1	826.8	838.6	668.5	193.66	640.386	777.967		861.2	777.967	3.30675	0.113674	0	4.01717	0.000458	1	1.21484	0.57853	0	GO:0005829,cytosol;GO:0005875,microtubule associated complex;GO:0005654,nucleoplasm	GO:0005080,protein kinase C binding	GO:0006915,apoptotic process;GO:0008643,carbohydrate transport;GO:0000077,DNA damage checkpoint;GO:0035556,intracellular signal transduction;GO:1902042,negative regulation of extrinsic apoptotic signaling pathway via death domain receptors;GO:0046325,negative regulation of glucose import;GO:1902043,positive regulation of extrinsic apoptotic signaling pathway via death domain receptors;GO:0043278,…
NCEH1_MOUSE	Q8BLF1	Nceh1	Neutral cholesterol ester hydrolase 1	583.8	618.3	649	691.3	590.2	554.5	556.4	590.7	591.6	617.033	612	579.567	617.033	612	579.567	0.991843	0.916493	0	0.939279	0.165421	0	0.947004	0.488618	0	GO:0005783,endoplasmic reticulum;GO:0016021,integral component of membrane;GO:0016020,membrane	GO:0016787,hydrolase activity;GO:0042301,phosphate ion binding;GO:0017171,serine hydrolase activity;GO:0034338,short-chain carboxylesterase activity	GO:0009056,catabolic process;GO:0046485,ether lipid metabolic process;GO:0016042,lipid catabolic process;GO:0006470,protein dephosphorylation;GO:0060395,SMAD protein signal transduction;GO:0006805,xenobiotic metabolic process	mmu:320024,path:mmu04927,Cortisol synthesis and secretion;mmu:320024,path:mmu04976,Bile secretion;mmu:320024,path:mmu04979,Cholesterol metabolism;mmu:320024,path:mmu04934,Cushing syndrome
COX15_MOUSE	Q8BJ03	Cox15	Cytochrome c oxidase assembly protein COX15 homolog	0	0	0	0	0	0	522.4	534.3	517.7	223.181	166.78	524.8			524.8	0.747288	0.200122	0	2.35146	3e-06	1	3.14666	0.000616	1	GO:0070069,cytochrome complex;GO:0016021,integral component of membrane;GO:0005743,mitochondrial inner membrane;GO:0005739,mitochondrion;GO:0005654,nucleoplasm	GO:0060090,molecular adaptor activity;GO:0016653,oxidoreductase activity;GO:0016627,oxidoreductase activity	GO:0006784,heme A biosynthetic process;GO:1902600,proton transmembrane transport;GO:0008535,respiratory chain complex IV assembly	mmu:226139,path:mmu00190,Oxidative phosphorylation;mmu:226139,path:mmu00860,Porphyrin and chlorophyll metabolism;mmu:226139,path:mmu04714,Thermogenesis
A0A668KLA9_MOUSE	A0A668KLA9	Ppp2r2b	Serine/threonine-protein phosphatase 2A 55 kDa regulatory subunit B	272.2	271.4	308.3	302.4	277.6	298.2	262.5	281.5	270.8	283.967	292.733	271.6	283.967	292.733	271.6	1.03087	0.575049	0	0.95645	0.406822	0	0.927807	0.088569	0	GO:0000159,protein phosphatase type 2A complex;GO:0005737,cytoplasm;GO:0005856,cytoskeleton;GO:0005829,cytosol;GO:0016020,membrane;GO:0005741,mitochondrial outer membrane;GO:0005739,mitochondrion	GO:0019888,protein phosphatase regulator activity;GO:0044877,protein-containing complex binding	GO:0000266,mitochondrial fission;GO:0043653,mitochondrial fragmentation involved in apoptotic process;GO:0070262,peptidyl-serine dephosphorylation;GO:0043525,positive regulation of neuron apoptotic process;GO:0006626,protein targeting to mitochondrion;GO:0043666,regulation of phosphoprotein phosphatase activity	mmu:72930,path:mmu03015,mRNA surveillance pathway;mmu:72930,path:mmu04390,Hippo signaling pathway;mmu:72930,path:mmu04071,Sphingolipid signaling pathway;mmu:72930,path:mmu04151,PI3K-Akt signaling pathway;mmu:72930,path:mmu04152,AMPK signaling pathway;mmu:72930,path:mmu04530,Tight junction;mmu:72930,path:mmu04261,Adrenergic signaling in cardiomyocytes;mmu:72930,path:mmu04728,Dopaminergic synapse;m…
D3Z165_MOUSE	D3Z165	Ccdc136	Coiled-coil domain-containing protein 136	76.4	97.9	86	79.5	81.1	77.1	72.2	85.5	76.1	86.7667	79.2333	77.9333	86.7667	79.2333	77.9333	0.913177	0.299551	0	0.898194	0.296594	0	0.983593	0.767856	0	GO:0016021,integral component of membrane;GO:0002080,acrosomal membrane;GO:0005739,mitochondrion		GO:0001675,acrosome assembly;GO:0007338,single fertilization;GO:0007283,spermatogenesis
A0A0R4J1J1_MOUSE	A0A0R4J1J1	Pnkd	Probable hydrolase PNKD	89.4	81.5	73.5	87.5	80.5	77.7	72.4	73.4	74.6	81.4667	81.9	73.4667	81.4667	81.9	73.4667	1.00532	0.940304	0	0.9018	0.159345	0	0.897029	0.047479	0	GO:0016020,membrane;GO:0005739,mitochondrion;GO:0005634,nucleus	GO:0004416,hydroxyacylglutathione hydrolase activity;GO:0046872,metal ion binding	GO:0019243,methylglyoxal catabolic process to D-lactate via S-lactoyl-glutathione;GO:0046929,negative regulation of neurotransmitter secretion;GO:0050884,neuromuscular process controlling posture;GO:0042053,regulation of dopamine metabolic process;GO:0032225,regulation of synaptic transmission
LHPL2_MOUSE	Q8BGA2	Lhfpl2	LHFPL tetraspan subfamily member 2 protein	606.4	530	607.3	622.5	598.7	679.7	559.3	622	504.5	581.233	633.633	561.933	581.233	633.633	561.933	1.09015	0.210059	0	0.966795	0.673484	0	0.886843	0.15983	0	GO:0016021,integral component of membrane;GO:0016020,membrane		GO:0046545,development of primary female sexual characteristics;GO:0046546,development of primary male sexual characteristics;GO:1905516,positive regulation of fertilization;GO:0007338,single fertilization
Q8BQ46_MOUSE	Q8BQ46	Taf15	TAF15 RNA polymerase II, TATA box binding protein (TBP)-associated factor	151.4	145.5	178.5	158.8	135.7	135.1	130.6	187.8	143.1	158.467	143.2	153.833	158.467	143.2	153.833	0.90366	0.299234	0	0.970761	0.829142	0	1.07425	0.60621	0	GO:0005737,cytoplasm;GO:0005654,nucleoplasm;GO:0005634,nucleus	GO:0046872,metal ion binding;GO:0003730,mRNA 3'-UTR binding;GO:0003723,RNA binding;GO:0003712,transcription coregulator activity	GO:0010467,gene expression;GO:0048255,mRNA stabilization;GO:0006355,regulation of transcription;GO:0008380,RNA splicing	mmu:70439,path:mmu03022,Basal transcription factors;mmu:70439,path:mmu05202,Transcriptional misregulation in cancer
D3YU00_MOUSE	D3YU00	Stard5	StAR-related lipid transfer protein 5	0	281.6	0	329.4	276	304.2	245.7	301.3	271.6	238.115	303.2	272.867	281.6	303.2	272.867	1.27333	0.074826	0	1.14594	0.27575	0	0.899956	0.244811	0		GO:0032052,bile acid binding;GO:0015485,cholesterol binding;GO:0120020,cholesterol transfer activity;GO:0008289,lipid binding	GO:0070508,cholesterol import
ENTP1_MOUSE	P55772	Entpd1	Ectonucleoside triphosphate diphosphohydrolase 1	302.8	277.1	319.8	301.9	272.3	289.4	258.1	255.7	220.1	299.9	287.867	244.633	299.9	287.867	244.633	0.959876	0.469797	0	0.815716	0.034034	-1	0.849815	0.044783	0	GO:0016021,integral component of membrane;GO:0005604,basement membrane;GO:0016323,basolateral plasma membrane;GO:0009986,cell surface;GO:0005615,extracellular space;GO:0043005,neuron projection;GO:0043025,neuronal cell body;GO:0014069,postsynaptic density;GO:0097060,synaptic membrane;GO:0008021,synaptic vesicle	GO:0016787,hydrolase activity;GO:0005524,ATP binding;GO:0102490,8-oxo-dGTP phosphohydrolase activity;GO:0043262,adenosine-diphosphatase activity;GO:0016887,ATPase activity;GO:0102485,dATP phosphohydrolase activity;GO:0102486,dCTP phosphohydrolase activity;GO:0102491,dGTP phosphohydrolase activity;GO:0102488,dTTP phosphohydrolase activity;GO:0102487,dUTP phosphohydrolase activity;GO:0102489,GTP ph…	GO:0007186,G protein-coupled receptor signaling pathway;GO:2001170,negative regulation of ATP biosynthetic process;GO:0033602,negative regulation of dopamine secretion;GO:0030168,platelet activation;GO:0009181,purine ribonucleoside diphosphate catabolic process	mmu:12495,path:mmu00230,Purine metabolism;mmu:12495,path:mmu00240,Pyrimidine metabolism;mmu:12495,path:mmu05169,Epstein-Barr virus infection
Q3UFM6_MOUSE	Q3UFM6	Ess2	Splicing factor ESS-2 homolog	71	69.2	75.4	78.8	72.2	71.7	76	78.9	67.1	71.8667	74.2333	74	71.8667	74.2333	74	1.03293	0.465518	0	1.02968	0.622001	0	0.996857	0.958591	0	GO:0071013,catalytic step 2 spliceosome;GO:0005634,nucleus		GO:0006397,mRNA processing;GO:0007399,nervous system development;GO:0008380,RNA splicing
RWDD1_MOUSE	Q9CQK7	Rwdd1	RWD domain-containing protein 1	0	0	0	0	1903.6	1942.2	1733.8	1719.4	1680.7	287.57	1354.39	1711.3		1922.9	1711.3	4.70978	0.134792	0	5.9509	8e-06	1	1.26352	0.564411	0	GO:0005737,cytoplasm;GO:0005844,polysome		GO:0030521,androgen receptor signaling pathway;GO:0007569,cell aging;GO:0034599,cellular response to oxidative stress;GO:0071394,cellular response to testosterone stimulus;GO:0002181,cytoplasmic translation;GO:2000825,positive regulation of androgen receptor activity
D4AFX7_MOUSE	D4AFX7	Dnajc13	DnaJ heat shock protein family (Hsp40) member C13	194	208.6	224.2	222.4	537.5	460.9	430.1	496.6	442.1	208.933	406.933	456.267	208.933	406.933	456.267	1.94767	0.106251	0	2.18379	0.000372	1	1.12123	0.638011	0	GO:0005829,cytosol;GO:0031901,early endosome membrane;GO:0010008,endosome membrane;GO:0043231,intracellular membrane-bounded organelle;GO:0071203,WASH complex;GO:0016021,integral component of membrane		GO:0007032,endosome organization;GO:0006898,receptor-mediated endocytosis;GO:2000641,regulation of early endosome to late endosome transport;GO:1902954,regulation of early endosome to recycling endosome transport
VAT1_MOUSE	Q62465	Vat1	Synaptic vesicle membrane protein VAT-1 homolog	0	0	0	0	0	0	466.9	655.8	479	225.611	294.162	533.9			533.9	1.30385	0.286923	0	2.36647	0.016775	1	1.81499	0.023221	1	GO:0005741,mitochondrial outer membrane	GO:0016491,oxidoreductase activity;GO:0008270,zinc ion binding	GO:0010637,negative regulation of mitochondrial fusion
G8JL40_MOUSE	G8JL40	Kdm1a	Lysine-specific histone demethylase 1A (Fragment)	0	0	0	0	424.7	478.3	375.3	442.3	379.1	226.213	391.598	398.9		451.5	398.9	1.7311	0.058858	0	1.76338	0.002353	1	1.01865	0.916699	0	GO:1990391,DNA repair complex;GO:0000790,nuclear chromatin;GO:0000784,nuclear chromosome;GO:0005654,nucleoplasm;GO:0005634,nucleus;GO:0032991,protein-containing complex	GO:0050681,androgen receptor binding;GO:0003682,chromatin binding;GO:0003677,DNA binding;GO:0019899,enzyme binding;GO:0050660,flavin adenine dinucleotide binding;GO:0034648,histone demethylase activity (H3-dimethyl-K4 specific);GO:0032454,histone demethylase activity (H3-K9 specific);GO:0043426,MRF binding;GO:0030374,nuclear receptor transcription coactivator activity;GO:0016491,oxidoreductase ac…	GO:0000380,alternative mRNA splicing;GO:0071320,cellular response to cAMP;GO:0071480,cellular response to gamma radiation;GO:0034644,cellular response to UV;GO:0021987,cerebral cortex development;GO:0046098,guanine metabolic process;GO:0043518,negative regulation of DNA damage response;GO:0043433,negative regulation of DNA-binding transcription factor activity;GO:1902166,negative regulation of in…	mmu:99982,path:mmu04714,Thermogenesis
RNF14_MOUSE	Q9JI90	Rnf14	E3 ubiquitin-protein ligase RNF14	232.6	241.6	254.5	245.3	254.4	260.9	236.5	235.9	233.3	242.9	253.533	235.233	242.9	253.533	235.233	1.04378	0.244552	0	0.968437	0.299079	0	0.92782	0.016777	0	GO:0005737,cytoplasm;GO:0005829,cytosol;GO:0005634,nucleus;GO:0000151,ubiquitin ligase complex	GO:0046872,metal ion binding;GO:0004842,ubiquitin-protein transferase activity;GO:0050681,androgen receptor binding;GO:0031624,ubiquitin conjugating enzyme binding;GO:0061630,ubiquitin protein ligase activity;GO:0019787,ubiquitin-like protein transferase activity	GO:0032436,positive regulation of proteasomal ubiquitin-dependent protein catabolic process;GO:0045893,positive regulation of transcription;GO:0000209,protein polyubiquitination;GO:0060765,regulation of androgen receptor signaling pathway;GO:0006355,regulation of transcription;GO:0006511,ubiquitin-dependent protein catabolic process
CNTFR_MOUSE	O88507	Cntfr	Ciliary neurotrophic factor receptor subunit alpha	602.8	682.2	592.1	601.6	613.9	563.3	579.5	560.1	574	625.7	592.933	571.2	625.7	592.933	571.2	0.947632	0.367012	0	0.912898	0.133375	0	0.963346	0.253119	0	GO:0031225,anchored component of membrane;GO:0016324,apical plasma membrane;GO:0070110,ciliary neurotrophic factor receptor complex;GO:0097059,CNTFR-CLCF1 complex;GO:0009897,external side of plasma membrane;GO:0043235,receptor complex	GO:0004897,ciliary neurotrophic factor receptor activity;GO:0019955,cytokine binding;GO:0004896,cytokine receptor activity;GO:0005102,signaling receptor binding	GO:0003360,brainstem development;GO:0070120,ciliary neurotrophic factor-mediated signaling pathway;GO:0019221,cytokine-mediated signaling pathway;GO:0043524,negative regulation of neuron apoptotic process;GO:0008284,positive regulation of cell population proliferation;GO:0007548,sex differentiation;GO:0060538,skeletal muscle organ development;GO:0001967,suckling behavior	mmu:12804,path:mmu04630,Jak-STAT signaling pathway;mmu:12804,path:mmu04060,Cytokine-cytokine receptor interaction
ODBB_MOUSE	Q6P3A8	Bckdhb	2-oxoisovalerate dehydrogenase subunit beta, mitochondrial	548.7	550.7	560.5	565.2	551.4	597.2	493	535.5	520.9	553.3	571.267	516.467	553.3	571.267	516.467	1.03247	0.270023	0	0.93343	0.047076	0	0.904073	0.040965	0	GO:0005947,mitochondrial alpha-ketoglutarate dehydrogenase complex;GO:0005743,mitochondrial inner membrane;GO:0005739,mitochondrion;GO:0005730,nucleolus	GO:0003863,3-methyl-2-oxobutanoate dehydrogenase (2-methylpropanoyl-transferring) activity;GO:0003826,alpha-ketoacid dehydrogenase activity;GO:0044877,protein-containing complex binding	GO:0009083,branched-chain amino acid catabolic process;GO:0009063,cellular amino acid catabolic process;GO:0007584,response to nutrient	mmu:12040,path:mmu00640,Propanoate metabolism;mmu:12040,path:mmu00280,Valine, leucine and isoleucine degradation
B3AT_MOUSE	P04919	Slc4a1	Band 3 anion transport protein	0	364.7	0	437.9	381.7	336.9	294.8	439	352.9	214.564	385.5	362.233	364.7	385.5	362.233	1.79666	0.101391	0	1.68823	0.161291	0	0.939645	0.672332	0	GO:0016323,basolateral plasma membrane;GO:0009986,cell surface;GO:0030863,cortical cytoskeleton;GO:0009898,cytoplasmic side of plasma membrane;GO:0005887,integral component of plasma membrane;GO:0014704,intercalated disc;GO:0016020,membrane;GO:0005886,plasma membrane;GO:0030018,Z disc	GO:0003779,actin binding;GO:0015301,anion;GO:0030506,ankyrin binding;GO:0015106,bicarbonate transmembrane transporter activity;GO:0015108,chloride transmembrane transporter activity;GO:0019899,enzyme binding;GO:0030492,hemoglobin binding;GO:0005452,inorganic anion exchanger activity;GO:0008022,protein C-terminus binding;GO:0042803,protein homodimerization activity;GO:0044877,protein-containing co…	GO:0006820,anion transport;GO:0015701,bicarbonate transport;GO:0007596,blood coagulation;GO:0006821,chloride transport;GO:0048821,erythrocyte development;GO:1904539,negative regulation of glycolytic process through fructose-6-phosphate;GO:0051354,negative regulation of oxidoreductase activity;GO:0035811,negative regulation of urine volume;GO:0045852,pH elevation;GO:0017121,plasma membrane phospho…	mmu:20533,path:mmu04966,Collecting duct acid secretion
PYRD_MOUSE	O35435	Dhodh	Dihydroorotate dehydrogenase (quinone), mitochondrial	294.1	310.7	336.8	349.7	278.8	296.4	252.3	283.8	262.4	313.867	308.3	266.167	313.867	308.3	266.167	0.982264	0.832557	0	0.848025	0.037124	0	0.863337	0.144173	0	GO:0005829,cytosol;GO:0016021,integral component of membrane;GO:0005743,mitochondrial inner membrane;GO:0005739,mitochondrion;GO:0043025,neuronal cell body;GO:0005654,nucleoplasm;GO:0005737,cytoplasm;GO:0016020,membrane	GO:0004152,dihydroorotate dehydrogenase activity;GO:0008144,drug binding;GO:0010181,FMN binding;GO:0048039,ubiquinone binding	GO:0006207,'de novo' pyrimidine nucleobase biosynthetic process;GO:0044205,'de novo' UMP biosynthetic process;GO:0007565,female pregnancy;GO:0007595,lactation;GO:0043065,positive regulation of apoptotic process;GO:0009220,pyrimidine ribonucleotide biosynthetic process;GO:0090140,regulation of mitochondrial fission;GO:0031000,response to caffeine;GO:1903576,response to L-arginine;GO:0042594,respon…	mmu:56749,path:mmu00240,Pyrimidine metabolism
MK_MOUSE	P12025	Mdk	Midkine	0	134.7	0	126.5	143.3	117.9	120.7	137.8	123.8	94.5384	129.233	127.433	134.7	129.233	127.433	1.36699	0.182772	0	1.34795	0.190557	0	0.986072	0.853271	0	GO:0042995,cell projection;GO:0005737,cytoplasm;GO:0005576,extracellular region	GO:0035374,chondroitin sulfate binding;GO:0008083,growth factor activity;GO:1904399,heparan sulfate binding;GO:0008201,heparin binding	GO:0030325,adrenal gland development;GO:0001662,behavioral fear response;GO:0016477,cell migration;GO:0021681,cerebellar granular layer development;GO:0021987,cerebral cortex development;GO:0007010,cytoskeleton organization;GO:0030421,defecation;GO:0021542,dentate gyrus development;GO:0044849,estrous cycle;GO:0106091,glial cell projection elongation;GO:0021766,hippocampus development;GO:0002232,l…
NCOA5_MOUSE	Q91W39	Ncoa5	Nuclear receptor coactivator 5	365.2	341.5	358.1	360.4	327.9	361.8	335.3	383.2	323.3	354.933	350.033	347.267	354.933	350.033	347.267	0.986195	0.727607	0	0.9784	0.715608	0	0.992096	0.903319	0	GO:0015629,actin cytoskeleton;GO:0005654,nucleoplasm	GO:0003682,chromatin binding	GO:0042593,glucose homeostasis;GO:0046627,negative regulation of insulin receptor signaling pathway
Q9JKY7_MOUSE	Q9JKY7	Cyp2d22	Cytochrome P450 CYP2D22	238.1	261.5	248.6	267.6	237.4	263.3	213.1	245.7	231.5	249.4	256.1	230.1	249.4	256.1	230.1	1.02686	0.594752	0	0.922614	0.171839	0	0.898477	0.123142	0	GO:0005737,cytoplasm;GO:0016021,integral component of membrane;GO:0043231,intracellular membrane-bounded organelle	GO:0008391,arachidonic acid monooxygenase activity;GO:0020037,heme binding;GO:0005506,iron ion binding;GO:0004497,monooxygenase activity;GO:0016712,oxidoreductase activity;GO:0008395,steroid hydroxylase activity	GO:0019369,arachidonic acid metabolic process;GO:0008207,C21-steroid hormone metabolic process;GO:0042416,dopamine biosynthetic process;GO:0042417,dopamine metabolic process;GO:0017144,drug metabolic process;GO:0042738,exogenous drug catabolic process;GO:0007565,female pregnancy;GO:0006082,organic acid metabolic process;GO:0055114,oxidation-reduction process;GO:0010033,response to organic substan…	mmu:56448,path:mmu00140,Steroid hormone biosynthesis;mmu:56448,path:mmu04726,Serotonergic synapse
KLH13_MOUSE	Q80TF4	Klhl13	Kelch-like protein 13	426.6	437.4	449.8	464	425.9	439.2	354.1	416.4	388.8	437.933	443.033	386.433	437.933	443.033	386.433	1.01165	0.715284	0	0.882402	0.055332	0	0.872244	0.055824	0	GO:0031463,Cul3-RING ubiquitin ligase complex;GO:0030496,midbody	GO:0097602,cullin family protein binding;GO:0047485,protein N-terminus binding;GO:0004842,ubiquitin-protein transferase activity	GO:0007049,cell cycle;GO:0051301,cell division;GO:0016567,protein ubiquitination;GO:0032465,regulation of cytokinesis	mmu:67455,path:mmu04120,Ubiquitin mediated proteolysis
TPC12_MOUSE	Q8K2L8	Trappc12	Trafficking protein particle complex subunit 12	0	109.4	0	112	109.2	90.8	83	123.4	472.2	198.822	104	226.2	109.4	104	226.2	0.523082	0.105939	0	1.1377	0.845268	0	2.175	0.379244	0	GO:0005793,endoplasmic reticulum-Golgi intermediate compartment;GO:0005794,Golgi apparatus;GO:0000776,kinetochore;GO:0005654,nucleoplasm;GO:0005634,nucleus;GO:0048471,perinuclear region of cytoplasm;GO:0030008,TRAPP complex	GO:0004175,endopeptidase activity	GO:0006888,endoplasmic reticulum to Golgi vesicle-mediated transport;GO:0007030,Golgi organization;GO:0051310,metaphase plate congression;GO:1905342,positive regulation of protein localization to kinetochore;GO:0090234,regulation of kinetochore assembly
K22E_MOUSE	Q3TTY5	Krt2	Keratin, type II cytoskeletal 2 epidermal	213.4	214.6	211.3	187.8	212.6	241.1	204.6	164.1	251	213.1	213.833	206.567	213.1	213.833	206.567	1.00344	0.964369	0	0.969341	0.807664	0	0.966017	0.81726	0	GO:0001533,cornified envelope;GO:0045095,keratin filament	GO:0008092,cytoskeletal protein binding;GO:0030280,structural constituent of skin epidermis	GO:0008544,epidermis development;GO:0045109,intermediate filament organization;GO:0031424,keratinization;GO:0032980,keratinocyte activation;GO:0003334,keratinocyte development;GO:0051546,keratinocyte migration;GO:0043616,keratinocyte proliferation;GO:0018149,peptide cross-linking;GO:0045684,positive regulation of epidermis development
MAVS_MOUSE	Q8VCF0	Mavs	Mitochondrial antiviral-signaling protein	184.4	182.9	189.7	195.6	193.9	157.8	158.4	191.1	160.8	185.667	182.433	170.1	185.667	182.433	170.1	0.982585	0.808625	0	0.916158	0.220221	0	0.932395	0.489059	0	GO:0005739,mitochondrion;GO:0016021,integral component of membrane;GO:0031966,mitochondrial membrane;GO:0005741,mitochondrial outer membrane;GO:0005778,peroxisomal membrane;GO:0005777,peroxisome	GO:0050700,CARD domain binding;GO:0019901,protein kinase binding;GO:0035591,signaling adaptor activity	GO:0051607,defense response to virus;GO:0002218,activation of innate immune response;GO:0071360,cellular response to exogenous dsRNA;GO:0042742,defense response to bacterium;GO:0045087,innate immune response;GO:0045071,negative regulation of viral genome replication;GO:0071651,positive regulation of chemokine (C-C motif) ligand 5 production;GO:0002230,positive regulation of defense response to vi…	mmu:228607,path:mmu04621,NOD-like receptor signaling pathway;mmu:228607,path:mmu04622,RIG-I-like receptor signaling pathway;mmu:228607,path:mmu04623,Cytosolic DNA-sensing pathway;mmu:228607,path:mmu05162,Measles;mmu:228607,path:mmu05164,Influenza A;mmu:228607,path:mmu05161,Hepatitis B;mmu:228607,path:mmu05160,Hepatitis C;mmu:228607,path:mmu05168,Herpes simplex virus 1 infection;mmu:228607,path:mm…
A0A0R4J101_MOUSE	A0A0R4J101	Slc4a2	Anion exchange protein	163	158.9	185.2	157.4	282.8	152.2	145.7	235.4	140.1	169.033	197.467	173.733	169.033	197.467	173.733	1.16821	0.548731	0	1.02781	0.890126	0	0.879811	0.675721	0	GO:0016020,membrane;GO:0016021,integral component of membrane;GO:0016324,apical plasma membrane;GO:0016323,basolateral plasma membrane	GO:0005452,inorganic anion exchanger activity;GO:0019899,enzyme binding;GO:0015301,anion;GO:0015108,chloride transmembrane transporter activity	GO:0048565,digestive tract development;GO:0051453,regulation of intracellular pH;GO:0007283,spermatogenesis;GO:0015701,bicarbonate transport;GO:0006821,chloride transport	mmu:20535,path:mmu04970,Salivary secretion;mmu:20535,path:mmu04971,Gastric acid secretion;mmu:20535,path:mmu04972,Pancreatic secretion;mmu:20535,path:mmu04976,Bile secretion
B2RXC2_MOUSE	B2RXC2	Itpkb	Kinase	233.1	257.2	243.5	237.9	239.2	232	213.6	243.7	189.2	244.6	236.367	215.5	244.6	236.367	215.5	0.96634	0.323726	0	0.88103	0.166646	0	0.911719	0.260049	0	GO:0005737,cytoplasm;GO:0005829,cytosol;GO:0016020,membrane;GO:0005634,nucleus	GO:0005524,ATP binding;GO:0051765,inositol tetrakisphosphate kinase activity;GO:0008440,inositol-1;GO:0016301,kinase activity	GO:0007166,cell surface receptor signaling pathway;GO:0071277,cellular response to calcium ion;GO:0035726,common myeloid progenitor cell proliferation;GO:0032958,inositol phosphate biosynthetic process;GO:0032957,inositol trisphosphate metabolic process;GO:0000165,MAPK cascade;GO:0002262,myeloid cell homeostasis;GO:0045638,negative regulation of myeloid cell differentiation;GO:0033030,negative re…	mmu:320404,path:mmu00562,Inositol phosphate metabolism;mmu:320404,path:mmu04020,Calcium signaling pathway;mmu:320404,path:mmu04070,Phosphatidylinositol signaling system
Q8CFT0_MOUSE	Q8CFT0	Rell2	RELT-like 2	336.7	360.7	317.2	378.9	395.4	486	370.7	421.9	320.7	338.2	420.1	371.1	338.2	420.1	371.1	1.24216	0.082828	0	1.09728	0.359412	0	0.883361	0.330665	0	GO:0016021,integral component of membrane;GO:0005604,basement membrane;GO:0031012,extracellular matrix;GO:0005886,plasma membrane	GO:0005518,collagen binding	GO:1900745,positive regulation of p38MAPK cascade;GO:0010811,positive regulation of cell-substrate adhesion
A0A140LJB7_MOUSE	A0A140LJB7	Gps1	COP9 signalosome complex subunit 1	136.6	149.4	161.7	149.5	163.2	134	137.8	144.1	390.4	149.233	148.9	224.1	149.233	148.9	224.1	0.997766	0.977522	0	1.50168	0.420536	0	1.50504	0.419214	0	GO:0008180,COP9 signalosome;GO:0005829,cytosol;GO:0005654,nucleoplasm		GO:0000338,protein deneddylation
A0A1B0GSU0_MOUSE	A0A1B0GSU0	Aldh16a1	Aldehyde dehydrogenase family 16 member A1	185	327	208	214.7	206.1	208.3	194.8	222.3	208.5	240	209.7	208.533	240	209.7	208.533	0.87375	0.529615	0	0.868889	0.520408	0	0.994436	0.895598	0		GO:0016620,oxidoreductase activity
MARH6_MOUSE	Q6ZQ89	Marchf6	E3 ubiquitin-protein ligase MARCHF6	201.8	202.8	204	214.6	193.6	181.6	166.1	203.7	189.5	202.867	196.6	186.433	202.867	196.6	186.433	0.969109	0.552061	0	0.918994	0.208835	0	0.948288	0.524559	0	GO:0005783,endoplasmic reticulum;GO:0030176,integral component of endoplasmic reticulum membrane;GO:0016021,integral component of membrane	GO:0019899,enzyme binding;GO:0031624,ubiquitin conjugating enzyme binding;GO:0061630,ubiquitin protein ligase activity;GO:0004842,ubiquitin-protein transferase activity;GO:1990381,ubiquitin-specific protease binding;GO:0008270,zinc ion binding	GO:0010498,proteasomal protein catabolic process;GO:0043161,proteasome-mediated ubiquitin-dependent protein catabolic process;GO:0070936,protein K48-linked ubiquitination;GO:0016567,protein ubiquitination;GO:0030433,ubiquitin-dependent ERAD pathway	mmu:223455,path:mmu04141,Protein processing in endoplasmic reticulum
E9QAS7_MOUSE	E9QAS7	Inpp5a	Inositol polyphosphate-5-phosphatase A	990.5	1046.9	1040.7	1042.7	947.7	996.5	912.2	1009.1	896.8	1026.03	995.633	939.367	1026.03	995.633	939.367	0.970371	0.405537	0	0.915532	0.09283	0	0.943487	0.275506	0	GO:0016020,membrane	GO:0004445,inositol-polyphosphate 5-phosphatase activity;GO:0042731,PH domain binding	GO:0046855,inositol phosphate dephosphorylation;GO:0048016,inositol phosphate-mediated signaling;GO:0046856,phosphatidylinositol dephosphorylation	mmu:212111,path:mmu00562,Inositol phosphate metabolism;mmu:212111,path:mmu04070,Phosphatidylinositol signaling system
A0A6I8MWZ7_MOUSE	A0A6I8MWZ7	Trim9	E3 ubiquitin-protein ligase TRIM9	0	0	0	0	563.4	562.5	561.3	566.6	542.8	241.036	447.174	556.9		562.95	556.9	1.85521	0.155709	0	2.31044	0.000198	1	1.24538	0.397757	0	GO:0005737,cytoplasm;GO:0005856,cytoskeleton;GO:0030425,dendrite;GO:0099523,presynaptic cytosol;GO:0008021,synaptic vesicle	GO:0019904,protein domain specific binding;GO:0042803,protein homodimerization activity;GO:0000149,SNARE binding;GO:0061630,ubiquitin protein ligase activity;GO:0008270,zinc ion binding	GO:0045955,negative regulation of calcium ion-dependent exocytosis;GO:0035544,negative regulation of SNARE complex assembly;GO:0043161,proteasome-mediated ubiquitin-dependent protein catabolic process;GO:0016079,synaptic vesicle exocytosis
NCALD_MOUSE	Q91X97	Ncald	Neurocalcin-delta	0	0	0	0	0	0	644.1	655	618.3	170.767	198.905	639.133			639.133	1.16477	0.450049	0	3.74273	7.4e-05	1	3.21326	5.5e-05	1	GO:0005829,cytosol	GO:0005509,calcium ion binding;GO:0003779,actin binding;GO:0043014,alpha-tubulin binding;GO:0030276,clathrin binding;GO:0015631,tubulin binding	GO:0019722,calcium-mediated signaling;GO:0003073,regulation of systemic arterial blood pressure	mmu:52589,path:mmu04740,Olfactory transduction
PMM1_MOUSE	O35621	Pmm1	Phosphomannomutase 1	0	471.7	0	534.9	476.1	477	458.9	513.3	438.3	452.276	496	470.167	471.7	496	470.167	1.09668	0.135006	0	1.03956	0.527319	0	0.947917	0.43271	0	GO:0005737,cytoplasm;GO:0005829,cytosol;GO:0043025,neuronal cell body	GO:0004615,phosphomannomutase activity;GO:0046872,metal ion binding	GO:0009298,GDP-mannose biosynthetic process;GO:1990830,cellular response to leukemia inhibitory factor;GO:0006013,mannose metabolic process;GO:0006487,protein N-linked glycosylation;GO:0045047,protein targeting to ER	mmu:29858,path:mmu00051,Fructose and mannose metabolism;mmu:29858,path:mmu00520,Amino sugar and nucleotide sugar metabolism
A0A3Q4L2V5_MOUSE	A0A3Q4L2V5	Mlst8	G protein beta subunit-like	138.2	159.2	146	150	152.9	169.1	141.5	132.5	129.3	147.8	157.333	134.433	147.8	157.333	134.433	1.0645	0.326651	0	0.909562	0.134273	0	0.854449	0.030412	0	GO:0031931,TORC1 complex;GO:0031932,TORC2 complex;GO:0005737,cytoplasm;GO:0005829,cytosol	GO:0043539,protein serine/threonine kinase activator activity	GO:0031929,TOR signaling;GO:0030838,positive regulation of actin filament polymerization;GO:0050731,positive regulation of peptidyl-tyrosine phosphorylation;GO:0032008,positive regulation of TOR signaling;GO:0032956,regulation of actin cytoskeleton organization;GO:0043087,regulation of GTPase activity;GO:0038202,TORC1 signaling	mmu:56716,path:mmu04151,PI3K-Akt signaling pathway;mmu:56716,path:mmu04150,mTOR signaling pathway;mmu:56716,path:mmu04140,Autophagy - animal;mmu:56716,path:mmu04136,Autophagy - other;mmu:56716,path:mmu04714,Thermogenesis
E0CX35_MOUSE	E0CX35	Mfsd4a	Major facilitator superfamily domain-containing protein 4A (Fragment)	0	234	0	260.3	239.7	238.5	201	209.1	204.5	152.496	246.167	204.867	234	246.167	204.867	1.61425	0.086911	0	1.34342	0.270097	0	0.832227	0.005188	-1	GO:0016021,integral component of membrane	GO:0022857,transmembrane transporter activity;GO:0005355,glucose transmembrane transporter activity
SLIRP_MOUSE	Q9D8T7	Slirp	SRA stem-loop-interacting RNA-binding protein, mitochondrial	0	0	0	0	0	0	252.1	286.4	259.6	200.573	197.873	266.033			266.033	0.986538	0.894807	0	1.32637	0.007325	1	1.34447	0.028689	1	GO:0001669,acrosomal vesicle;GO:0005737,cytoplasm;GO:0005739,mitochondrion;GO:0005634,nucleus;GO:0048471,perinuclear region of cytoplasm;GO:1990904,ribonucleoprotein complex;GO:0036126,sperm flagellum	GO:0003676,nucleic acid binding;GO:0003723,RNA binding	GO:0030317,flagellated sperm motility;GO:0070584,mitochondrion morphogenesis;GO:0000961,negative regulation of mitochondrial RNA catabolic process;GO:0051252,regulation of RNA metabolic process;GO:0007338,single fertilization;GO:0007286,spermatid development
BAG4_MOUSE	Q8CI61	Bag4	BAG family molecular chaperone regulator 4	0	0	0	0	253.4	249.6	204.4	213.2	201.6	227.996	285.808	206.4		251.5	206.4	1.25357	0.392859	0	0.90528	0.687196	0	0.722162	0.082805	0	GO:0005737,cytoplasm;GO:0005829,cytosol;GO:0005634,nucleus;GO:0005886,plasma membrane	GO:0051087,chaperone binding;GO:0044877,protein-containing complex binding;GO:0031625,ubiquitin protein ligase binding	GO:0071364,cellular response to epidermal growth factor stimulus;GO:0071356,cellular response to tumor necrosis factor;GO:0090367,negative regulation of mRNA modification;GO:2001145,negative regulation of phosphatidylinositol-3;GO:1903215,negative regulation of protein targeting to mitochondrion;GO:0030838,positive regulation of actin filament polymerization;GO:0045785,positive regulation of cell…	mmu:67384,path:mmu04668,TNF signaling pathway
LRFN1_MOUSE	Q2WF71	Lrfn1	Leucine-rich repeat and fibronectin type III domain-containing protein 1	0	0	0	0	0	0	0	0	308.4	282.736	209.35	374.981			308.4	0.740444	0.256711	0	1.32626	0.231339	0	1.79117	0.010894	1	GO:0009986,cell surface;GO:0099061,integral component of postsynaptic density membrane		GO:0099151,regulation of postsynaptic density assembly
SARAF_MOUSE	Q8R3Q0	Saraf	Store-operated calcium entry-associated regulatory factor	232.1	208.9	220.2	213.2	221.7	218.2	196.2	189.3	173.8	220.4	217.7	186.433	220.4	217.7	186.433	0.98775	0.724446	0	0.845886	0.022639	0	0.856377	0.011476	0	GO:0005783,endoplasmic reticulum;GO:0140268,endoplasmic reticulum-plasma membrane contact site;GO:0030176,integral component of endoplasmic reticulum membrane		GO:0006816,calcium ion transport;GO:2001256,regulation of store-operated calcium entry
TACAN_MOUSE	Q8C1E7	Tmem120a	Ion channel TACAN	0	159.9	0	169	159.1	169	148.4	135.7	132.2	272.784	165.7	138.767	159.9	165.7	138.767	0.607439	0.133411	0	0.508705	0.078775	0	0.837457	0.010454	0	GO:0016021,integral component of membrane;GO:0005637,nuclear inner membrane;GO:0005886,plasma membrane	GO:0005216,ion channel activity	GO:0050966,detection of mechanical stimulus involved in sensory perception of pain;GO:0045444,fat cell differentiation;GO:0034220,ion transmembrane transport;GO:0051291,protein heterooligomerization;GO:0051260,protein homooligomerization
F185A_MOUSE	Q7TPD2	Fam185a	Protein FAM185A	0	0	0	0	57.6	63.1	54.9	61.4	52.2	205.374	117.265	56.1667		60.35	56.1667	0.570983	0.198528	0	0.273485	2e-05	-1	0.478973	0.34415	0	GO:0005829,cytosol
NDKA_MOUSE	P15532	Nme1	Nucleoside diphosphate kinase A	0	0	0	0	145.2	148.6	142.2	190.3	172.4	192.27	148.413	168.3		146.9	168.3	0.771895	0.195717	0	0.875331	0.48918	0	1.134	0.232621	0	GO:0005813,centrosome;GO:0005829,cytosol;GO:0005882,intermediate filament;GO:0016020,membrane;GO:0005741,mitochondrial outer membrane;GO:0005739,mitochondrion;GO:0043209,myelin sheath;GO:0005634,nucleus;GO:0048471,perinuclear region of cytoplasm;GO:0032587,ruffle membrane	GO:0005524,ATP binding;GO:0004550,nucleoside diphosphate kinase activity;GO:0004536,deoxyribonuclease activity;GO:0019899,enzyme binding;GO:0043015,gamma-tubulin binding;GO:0005525,GTP binding;GO:0042802,identical protein binding;GO:0019215,intermediate filament binding;GO:0000287,magnesium ion binding;GO:0019901,protein kinase binding;GO:0043024,ribosomal small subunit binding;GO:0000977,RNA pol…	GO:0006241,CTP biosynthetic process;GO:0006183,GTP biosynthetic process;GO:0006228,UTP biosynthetic process;GO:0035690,cellular response to drug;GO:0071398,cellular response to fatty acid;GO:0071333,cellular response to glucose stimulus;GO:0006897,endocytosis;GO:0021766,hippocampus development;GO:0007595,lactation;GO:0030879,mammary gland development;GO:0010629,negative regulation of gene express…	mmu:18102,path:mmu00230,Purine metabolism;mmu:18102,path:mmu00240,Pyrimidine metabolism;mmu:18102,path:mmu00983,Drug metabolism - other enzymes
A2A6M1_MOUSE	A2A6M1	Snf8	Vacuolar-sorting protein SNF8	711.2	713.8	776.7	789.2	718.3	752.1	639.5	711.6	654.4	733.9	753.2	668.5	733.9	753.2	668.5	1.0263	0.550292	0	0.910887	0.100039	0	0.887546	0.047826	0	GO:0000814,ESCRT II complex;GO:0005737,cytoplasm;GO:0005829,cytosol;GO:0010008,endosome membrane;GO:0031902,late endosome membrane;GO:0016020,membrane;GO:0005654,nucleoplasm;GO:0005634,nucleus;GO:0048471,perinuclear region of cytoplasm;GO:0005886,plasma membrane;GO:0055037,recycling endosome;GO:0005667,transcription regulator complex	GO:0016247,channel regulator activity;GO:0008022,protein C-terminus binding;GO:0042803,protein homodimerization activity;GO:0047485,protein N-terminus binding;GO:0008134,transcription factor binding	GO:0071985,multivesicular body sorting pathway;GO:0015031,protein transport;GO:0045022,early endosome to late endosome transport;GO:0032456,endocytic recycling;GO:1903543,positive regulation of exosomal secretion;GO:0010628,positive regulation of gene expression;GO:0045732,positive regulation of protein catabolic process;GO:0043328,protein transport to vacuole involved in ubiquitin-dependent prot…	mmu:27681,path:mmu04144,Endocytosis
Q5JC28_MOUSE	Q5JC28	Eps15	Epidermal growth factor receptor pathway substrate 15 isoform B	88.3	87.3	113.2	113.1	98.9	115.4	74.7	118.3	68	96.2667	109.133	87	96.2667	109.133	87	1.13366	0.264336	0	0.90374	0.631998	0	0.79719	0.253089	0	GO:0016235,aggresome;GO:0030122,AP-2 adaptor complex;GO:0016324,apical plasma membrane;GO:0009925,basal plasma membrane;GO:0060170,ciliary membrane;GO:0030132,clathrin coat of coated pit;GO:0005905,clathrin-coated pit;GO:0030136,clathrin-coated vesicle;GO:0005829,cytosol;GO:0005769,early endosome;GO:0031901,early endosome membrane;GO:0098978,glutamatergic synapse;GO:0043231,intracellular membrane…	GO:0005509,calcium ion binding;GO:0042802,identical protein binding;GO:0031593,polyubiquitin modification-dependent protein binding;GO:0017124,SH3 domain binding	GO:0048268,clathrin coat assembly;GO:0032456,endocytic recycling;GO:0006897,endocytosis;GO:0016197,endosomal transport;GO:0006895,Golgi to endosome transport;GO:0001921,positive regulation of receptor recycling;GO:0098884,postsynaptic neurotransmitter receptor internalization;GO:0019065,receptor-mediated endocytosis of virus by host cell;GO:0042127,regulation of cell population proliferation;GO:0…	mmu:13858,path:mmu04144,Endocytosis
CC115_MOUSE	Q8VE99	Ccdc115	Coiled-coil domain-containing protein 115	383.1	410.2	405.7	447.4	430.8	433	386.1	447.7	417	399.667	437.067	416.933	399.667	437.067	416.933	1.09358	0.019275	0	1.0432	0.429391	0	0.953935	0.33831	0	GO:0030137,COPI-coated vesicle;GO:0005783,endoplasmic reticulum;GO:0005793,endoplasmic reticulum-Golgi intermediate compartment;GO:0005768,endosome;GO:0042406,extrinsic component of endoplasmic reticulum membrane;GO:0005764,lysosome;GO:0016471,vacuolar proton-transporting V-type ATPase complex	GO:0051082,unfolded protein binding	GO:0006879,cellular iron ion homeostasis;GO:0036295,cellular response to increased oxygen levels;GO:0007042,lysosomal lumen acidification;GO:1905146,lysosomal protein catabolic process;GO:0070072,vacuolar proton-transporting V-type ATPase complex assembly
CARL3_MOUSE	Q3UFQ8	Carmil3	Capping protein, Arp2/3 and myosin-I linker protein 3	0	0	0	0	180.6	143	157.1	177.9	166.7	116.148	135.152	167.233		161.8	167.233	1.16362	0.627318	0	1.43983	0.08825	0	1.23737	0.336432	0	GO:0005737,cytoplasm;GO:0005886,plasma membrane
A0A0A6YVS2_MOUSE	A0A0A6YVS2	Tmco1	Calcium load-activated calcium channel (Fragment)	110	125.6	112.7	138.8	118.6	110.1	107.4	111.5	110.6	116.1	122.5	109.833	116.1	122.5	109.833	1.05513	0.548504	0	0.946024	0.276017	0	0.896599	0.214856	0	GO:0005737,cytoplasm;GO:0005783,endoplasmic reticulum;GO:0000139,Golgi membrane;GO:0030176,integral component of endoplasmic reticulum membrane	GO:0005262,calcium channel activity	GO:0070588,calcium ion transmembrane transport;GO:0006874,cellular calcium ion homeostasis;GO:0032469,endoplasmic reticulum calcium ion homeostasis;GO:0006983,ER overload response
PLXC1_MOUSE	Q9QZC2	Plxnc1	Plexin-C1	352.1	375.8	387.3	365.9	362.6	404.2	345.2	400.7	370.4	371.733	377.567	372.1	371.733	377.567	372.1	1.01569	0.747363	0	1.00099	0.985603	0	0.985521	0.806325	0	GO:0005887,integral component of plasma membrane;GO:0002116,semaphorin receptor complex	GO:0017154,semaphorin receptor activity	GO:0007162,negative regulation of cell adhesion;GO:0050772,positive regulation of axonogenesis;GO:0030334,regulation of cell migration;GO:0008360,regulation of cell shape;GO:0043087,regulation of GTPase activity;GO:1902287,semaphorin-plexin signaling pathway involved in axon guidance	mmu:54712,path:mmu04360,Axon guidance
A0A140LHN0_MOUSE	A0A140LHN0	Yif1b	Protein YIF1B (Fragment)	0	0	0	0	237.7	241.3	197.5	250.1	571.6	141.141	246.808	339.733		239.5	339.733	1.74866	0.101052	0	2.40705	0.192551	0	1.37651	0.472072	0	GO:0030134,COPII-coated ER to Golgi transport vesicle;GO:0005783,endoplasmic reticulum;GO:0005789,endoplasmic reticulum membrane;GO:0005793,endoplasmic reticulum-Golgi intermediate compartment;GO:0033116,endoplasmic reticulum-Golgi intermediate compartment membrane;GO:0005794,Golgi apparatus;GO:0030173,integral component of Golgi membrane;GO:0016021,integral component of membrane		GO:0006888,endoplasmic reticulum to Golgi vesicle-mediated transport;GO:0006612,protein targeting to membrane
PICK1_MOUSE	Q62083	Pick1	PRKCA-binding protein	367.4	358	385.6	383.7	366.9	373.6	587.8	651	624.2	370.333	374.733	621	370.333	374.733	621	1.01188	0.666008	0	1.67687	0.000234	1	1.65718	0.000202	1	GO:0016235,aggresome;GO:0005737,cytoplasm;GO:0005856,cytoskeleton;GO:0005829,cytosol;GO:0030425,dendrite;GO:0098978,glutamatergic synapse;GO:0005794,Golgi apparatus;GO:0005739,mitochondrion;GO:0043005,neuron projection;GO:0048471,perinuclear region of cytoplasm;GO:0005886,plasma membrane;GO:0014069,postsynaptic density;GO:0098842,postsynaptic early endosome;GO:0098843,postsynaptic endocytic zone;…	GO:0019904,protein domain specific binding;GO:0051015,actin filament binding;GO:0071933,Arp2/3 complex binding;GO:0008092,cytoskeletal protein binding;GO:0019899,enzyme binding;GO:0001664,G protein-coupled receptor binding;GO:0042802,identical protein binding;GO:0035255,ionotropic glutamate receptor binding;GO:0140090,membrane curvature sensor activity;GO:0046872,metal ion binding;GO:0005543,phos…	GO:0036294,cellular response to decreased oxygen levels;GO:0042149,cellular response to glucose starvation;GO:0097062,dendritic spine maintenance;GO:0097061,dendritic spine organization;GO:0021782,glial cell development;GO:0006886,intracellular protein transport;GO:0035556,intracellular signal transduction;GO:0060292,long-term synaptic depression;GO:0015844,monoamine transport;GO:0007275,multicel…
NLGN2_MOUSE	Q69ZK9	Nlgn2	Neuroligin-2	1801.6	1403.1	1708.4	1720	1669.7	1800.5	1444.1	1815.9	1414.4	1637.7	1730.07	1558.13	1637.7	1730.07	1558.13	1.0564	0.504896	0	0.951416	0.675562	0	0.90062	0.270783	0	GO:0060077,inhibitory synapse;GO:0005887,integral component of plasma membrane;GO:0009986,cell surface;GO:0005737,cytoplasm;GO:0043198,dendritic shaft;GO:0098691,dopaminergic synapse;GO:0060076,excitatory synapse;GO:0098982,GABA-ergic synapse;GO:0098690,glycinergic synapse;GO:0099055,integral component of postsynaptic membrane;GO:0099060,integral component of postsynaptic specialization membrane;…	GO:0042043,neurexin family protein binding;GO:0050839,cell adhesion molecule binding;GO:0042802,identical protein binding;GO:0038023,signaling receptor activity	GO:0007155,cell adhesion;GO:0050804,modulation of chemical synaptic transmission;GO:0050808,synapse organization;GO:0007268,chemical synaptic transmission;GO:0097116,gephyrin clustering involved in postsynaptic density assembly;GO:1904862,inhibitory synapse assembly;GO:1901142,insulin metabolic process;GO:0007630,jump response;GO:0035641,locomotory exploration behavior;GO:0050885,neuromuscular pr…	mmu:216856,path:mmu04514,Cell adhesion molecules (CAMs)
A2AWI7_MOUSE	A2AWI7	Sh3glb2	Endophilin-B2	204.2	182.6	205.2	225.4	186.4	194.9	175.2	183.4	178.8	197.333	202.233	179.133	197.333	202.233	179.133	1.02483	0.743083	0	0.90777	0.078519	0	0.885776	0.128315	0	GO:0005737,cytoplasm;GO:0005829,cytosol;GO:0005654,nucleoplasm	GO:0042802,identical protein binding		mmu:227700,path:mmu04144,Endocytosis
EMC6_MOUSE	Q9CQW0	Emc6	ER membrane protein complex subunit 6	200.9	195.8	207.9	202.9	189.2	183.2	172.4	192.6	193.8	201.533	191.767	186.267	201.533	191.767	186.267	0.951538	0.224474	0	0.924247	0.121154	0	0.971319	0.576792	0	GO:0072546,ER membrane protein complex;GO:0030176,integral component of endoplasmic reticulum membrane;GO:0016021,integral component of membrane;GO:0097631,integral component of omegasome membrane		GO:0000045,autophagosome assembly
PLD2_MOUSE	P97813	Pld2	Phospholipase D2	79.2	102.6	97.6	98.7	88.2	95.2	77.5	78.6	79.3	93.1333	94.0333	78.4667	93.1333	94.0333	78.4667	1.00966	0.913207	0	0.84252	0.108956	0	0.834456	0.00764	0	GO:0031526,brush border membrane;GO:0005901,caveola;GO:0005789,endoplasmic reticulum membrane;GO:0005794,Golgi apparatus;GO:0030027,lamellipodium;GO:0005634,nucleus;GO:0005886,plasma membrane;GO:0042383,sarcolemma	GO:0035091,phosphatidylinositol binding;GO:0003824,catalytic activity;GO:0070290,N-acylphosphatidylethanolamine-specific phospholipase D activity;GO:0004630,phospholipase D activity;GO:0005080,protein kinase C binding	GO:0048017,inositol lipid-mediated signaling;GO:0016042,lipid catabolic process;GO:0006654,phosphatidic acid biosynthetic process;GO:0048870,cell motility;GO:0002031,G protein-coupled receptor internalization;GO:0031175,neuron projection development;GO:0009395,phospholipid catabolic process;GO:0045785,positive regulation of cell adhesion;GO:0030335,positive regulation of cell migration;GO:0043306…	mmu:18806,path:mmu00564,Glycerophospholipid metabolism;mmu:18806,path:mmu00565,Ether lipid metabolism;mmu:18806,path:mmu04014,Ras signaling pathway;mmu:18806,path:mmu04072,Phospholipase D signaling pathway;mmu:18806,path:mmu04071,Sphingolipid signaling pathway;mmu:18806,path:mmu04024,cAMP signaling pathway;mmu:18806,path:mmu04144,Endocytosis;mmu:18806,path:mmu04666,Fc gamma R-mediated phagocytosi…
NSG2_MOUSE	P47759	Nsg2	Neuronal vesicle trafficking-associated protein 2	84	88.8	88.2	93.1	254.8	295.3	237.6	242.5	242.1	87	214.4	240.733	87	214.4	240.733	2.46437	0.108208	0	2.76705	0	1	1.12282	0.691898	0	GO:0016021,integral component of membrane;GO:0030659,cytoplasmic vesicle membrane;GO:0030425,dendrite;GO:0005769,early endosome;GO:0031901,early endosome membrane;GO:0005768,endosome;GO:0005794,Golgi apparatus;GO:1990674,Golgi cis cisterna membrane;GO:0005770,late endosome;GO:0043202,lysosomal lumen;GO:0032585,multivesicular body membrane;GO:0032588,trans-Golgi network membrane	GO:0032051,clathrin light chain binding	GO:0048268,clathrin coat assembly;GO:0007212,dopamine receptor signaling pathway;GO:0016197,endosomal transport
ADX_MOUSE	P46656	Fdx1	Adrenodoxin, mitochondrial	0	0	0	0	401.9	409	385.6	441.4	386.6	198.433	364.355	404.533		405.45	404.533	1.83616	0.031763	1	2.03863	0.004468	1	1.11027	0.423222	0	GO:0030061,mitochondrial crista;GO:0005759,mitochondrial matrix;GO:0005739,mitochondrion	GO:0051537,2 iron;GO:0009055,electron transfer activity;GO:0019899,enzyme binding;GO:0005506,iron ion binding	GO:0071320,cellular response to cAMP;GO:1904322,cellular response to forskolin;GO:0008203,cholesterol metabolic process;GO:0042446,hormone biosynthetic process;GO:0070995,NADPH oxidation;GO:0051353,positive regulation of oxidoreductase activity;GO:0050790,regulation of catalytic activity;GO:0006694,steroid biosynthetic process
RING2_MOUSE	Q9CQJ4	Rnf2	E3 ubiquitin-protein ligase RING2	0	0	0	0	0	0	0	0	127.1	182.662	184.376	278.947			127.1	1.00938	0.947782	0	1.52712	0.29284	0	1.51292	0.292071	0	GO:0071339,MLL1 complex;GO:0035102,PRC1 complex;GO:0000791,euchromatin;GO:0000792,heterochromatin;GO:0016604,nuclear body;GO:0005654,nucleoplasm;GO:0005634,nucleus;GO:0031519,PcG protein complex;GO:0001739,sex chromatin;GO:0000151,ubiquitin ligase complex	GO:0003682,chromatin binding;GO:0071535,RING-like zinc finger domain binding;GO:0061630,ubiquitin protein ligase activity;GO:0008270,zinc ion binding	GO:0036353,histone H2A-K119 monoubiquitination;GO:0009948,anterior/posterior axis specification;GO:0001702,gastrulation with mouth forming second;GO:0010467,gene expression;GO:0007281,germ cell development;GO:0035518,histone H2A monoubiquitination;GO:0016574,histone ubiquitination;GO:0000278,mitotic cell cycle;GO:0043433,negative regulation of DNA-binding transcription factor activity;GO:0000122,…
STAG2_MOUSE	O35638	Stag2	Cohesin subunit SA-2	80	81.9	89.3	84.4	68.5	68.4	58.8	83	58.7	83.7333	73.7667	66.8333	83.7333	73.7667	66.8333	0.880971	0.173495	0	0.798169	0.119792	0	0.90601	0.513228	0	GO:0000785,chromatin;GO:0000775,chromosome;GO:0008278,cohesin complex;GO:0097431,mitotic spindle pole;GO:0016363,nuclear matrix;GO:0005654,nucleoplasm;GO:0005634,nucleus	GO:0003682,chromatin binding	GO:0051301,cell division;GO:0051321,meiotic cell cycle;GO:1901673,regulation of mitotic spindle assembly;GO:0007062,sister chromatid cohesion;GO:0019827,stem cell population maintenance	mmu:20843,path:mmu04110,Cell cycle
F6UMH9_MOUSE	F6UMH9	Ubac1	Ubiquitin-associated domain-containing protein 1 (Fragment)	0	217.2	0	239.8	220.4	205	183.3	225	237.1	273.323	221.733	215.133	217.2	221.733	215.133	0.811251	0.16664	0	0.787103	0.15392	0	0.970235	0.747778	0	GO:0005829,cytosol;GO:0005794,Golgi apparatus;GO:0005886,plasma membrane		GO:0016567,protein ubiquitination
PHP14_MOUSE	Q9DAK9	Phpt1	14 kDa phosphohistidine phosphatase	103	104	132	127.3	104.9	101.8	107.1	120	101.2	113	111.333	109.433	113	111.333	109.433	0.985251	0.899928	0	0.968437	0.762141	0	0.982934	0.855206	0	GO:0005829,cytosol	GO:0019855,calcium channel inhibitor activity;GO:0044325,ion channel binding;GO:0101006,protein histidine phosphatase activity	GO:2000984,negative regulation of ATP citrate synthase activity;GO:0051350,negative regulation of lyase activity;GO:0050860,negative regulation of T cell receptor signaling pathway;GO:0035971,peptidyl-histidine dephosphorylation;GO:2000147,positive regulation of cell motility;GO:0035774,positive regulation of insulin secretion involved in cellular response to glucose stimulus;GO:0006470,protein d…
D3Z3S1_MOUSE	D3Z3S1	Preb	Prolactin regulatory element-binding protein	0	778.8	0	828.5	790.5	819.5	667.9	822.1	696.5	458.461	812.833	728.833	778.8	812.833	728.833	1.77296	0.092144	0	1.58974	0.181084	0	0.896658	0.159818	0	GO:0070971,endoplasmic reticulum exit site;GO:0000139,Golgi membrane;GO:0030176,integral component of endoplasmic reticulum membrane;GO:0005634,nucleus	GO:0003700,DNA-binding transcription factor activity;GO:0005096,GTPase activator activity;GO:0051020,GTPase binding;GO:0000978,RNA polymerase II cis-regulatory region sequence-specific DNA binding;GO:0005090,Sar guanyl-nucleotide exchange factor activity	GO:0048208,COPII vesicle coating;GO:0006888,endoplasmic reticulum to Golgi vesicle-mediated transport;GO:0045944,positive regulation of transcription by RNA polymerase II;GO:0032527,protein exit from endoplasmic reticulum;GO:0009306,protein secretion;GO:0003400,regulation of COPII vesicle coating	mmu:50907,path:mmu04141,Protein processing in endoplasmic reticulum
HIP1_MOUSE	Q8VD75	Hip1	Huntingtin-interacting protein 1	0	0	0	0	175	182.3	164.8	164.4	162.8	255.844	275.556	164		178.65	164	1.07704	0.888855	0	0.641015	0.366116	0	0.595161	0.313898	0	GO:0030136,clathrin-coated vesicle;GO:0030665,clathrin-coated vesicle membrane;GO:0005737,cytoplasm;GO:0031234,extrinsic component of cytoplasmic side of plasma membrane;GO:0098890,extrinsic component of postsynaptic membrane;GO:0098888,extrinsic component of presynaptic membrane;GO:0098978,glutamatergic synapse;GO:0005794,Golgi apparatus;GO:0043231,intracellular membrane-bounded organelle;GO:000…	GO:0030276,clathrin binding;GO:0035091,phosphatidylinositol binding;GO:0003779,actin binding;GO:0051015,actin filament binding;GO:0035612,AP-2 adaptor complex binding;GO:0035615,clathrin adaptor activity;GO:0032051,clathrin light chain binding;GO:0043325,phosphatidylinositol-3;GO:0080025,phosphatidylinositol-3;GO:0032266,phosphatidylinositol-3-phosphate binding;GO:0046982,protein heterodimerizati…	GO:0006915,apoptotic process;GO:0048268,clathrin coat assembly;GO:0072583,clathrin-dependent endocytosis;GO:0007015,actin filament organization;GO:0006919,activation of cysteine-type endopeptidase activity involved in apoptotic process;GO:0097190,apoptotic signaling pathway;GO:0030154,cell differentiation;GO:0006897,endocytosis;GO:0045742,positive regulation of epidermal growth factor receptor si…	mmu:215114,path:mmu05016,Huntington disease
BAG2_MOUSE	Q91YN9	Bag2	BAG family molecular chaperone regulator 2	0	0	0	0	0	0	0	0	180.3	150.558	254.851	141.412			180.3	1.69271	0.209188	0	0.939258	0.769102	0	0.554883	0.17805	0	GO:0030424,axon;GO:0101031,chaperone complex;GO:0030425,dendrite	GO:0000774,adenyl-nucleotide exchange factor activity;GO:0051087,chaperone binding;GO:0031072,heat shock protein binding;GO:0042802,identical protein binding;GO:0044325,ion channel binding;GO:0048156,tau protein binding;GO:0031625,ubiquitin protein ligase binding	GO:0032091,negative regulation of protein binding;GO:0031397,negative regulation of protein ubiquitination;GO:1904667,negative regulation of ubiquitin protein ligase activity;GO:1901800,positive regulation of proteasomal protein catabolic process;GO:0010954,positive regulation of protein processing;GO:0019538,protein metabolic process;GO:0050821,protein stabilization	mmu:213539,path:mmu04141,Protein processing in endoplasmic reticulum
GOLM1_MOUSE	Q91XA2	Golm1	Golgi membrane protein 1	177.8	185	194.7	193.8	177.7	189.8	136.3	160.1	153.2	185.833	187.1	149.867	185.833	187.1	149.867	1.00682	0.862976	0	0.806457	0.013893	-1	0.800998	0.012197	-1	GO:0005794,Golgi apparatus;GO:0016021,integral component of membrane		GO:0006997,nucleus organization;GO:0019216,regulation of lipid metabolic process
NUDT9_MOUSE	Q8BVU5	Nudt9	ADP-ribose pyrophosphatase, mitochondrial	374.3	337.8	392.3	410.2	389.5	400.9	834.6	884.2	1382.9	368.133	400.2	1033.9	368.133	400.2	1033.9	1.08711	0.134238	0	2.80849	0.019324	1	2.58346	0.022412	1	GO:0005739,mitochondrion;GO:0030054,cell junction;GO:0016604,nuclear body;GO:0031965,nuclear membrane	GO:0047631,ADP-ribose diphosphatase activity;GO:0043262,adenosine-diphosphatase activity	GO:0046032,ADP catabolic process;GO:0046709,IDP catabolic process	mmu:74167,path:mmu00230,Purine metabolism
ABHD6_MOUSE	Q8R2Y0	Abhd6	Monoacylglycerol lipase ABHD6	770.3	729.9	885.5	801.2	818.3	769.8	704.3	773.3	675.4	795.233	796.433	717.667	795.233	796.433	717.667	1.00151	0.981534	0	0.90246	0.230718	0	0.901101	0.071476	0	GO:0032281,AMPA glutamate receptor complex;GO:0098982,GABA-ergic synapse;GO:0098978,glutamatergic synapse;GO:0016021,integral component of membrane;GO:0099055,integral component of postsynaptic membrane;GO:0031902,late endosome membrane;GO:0005765,lysosomal membrane;GO:0031966,mitochondrial membrane;GO:0005739,mitochondrion	GO:0047372,acylglycerol lipase activity;GO:0004620,phospholipase activity	GO:0046464,acylglycerol catabolic process;GO:0060292,long-term synaptic depression;GO:2001311,lysobisphosphatidic acid metabolic process;GO:0052651,monoacylglycerol catabolic process;GO:0030336,negative regulation of cell migration;GO:0120163,negative regulation of cold-induced thermogenesis;GO:0009395,phospholipid catabolic process;GO:0046889,positive regulation of lipid biosynthetic process;GO:…	mmu:66082,path:mmu04723,Retrograde endocannabinoid signaling
Q91V89_MOUSE	Q91V89	Ppp2r5d	Serine/threonine-protein phosphatase 2A 56 kDa regulatory subunit	0	0	0	0	162.6	158.6	155.5	171.1	174	150.255	176.991	166.867		160.6	166.867	1.17794	0.369689	0	1.11055	0.483599	0	0.942796	0.592016	0	GO:0005829,cytosol;GO:0005634,nucleus;GO:0000159,protein phosphatase type 2A complex	GO:0004721,phosphoprotein phosphatase activity;GO:0072542,protein phosphatase activator activity	GO:0071363,cellular response to growth factor stimulus;GO:0010801,negative regulation of peptidyl-threonine phosphorylation;GO:0010976,positive regulation of neuron projection development;GO:0051388,positive regulation of neurotrophin TRK receptor signaling pathway;GO:0035307,positive regulation of protein dephosphorylation;GO:0045944,positive regulation of transcription by RNA polymerase II;GO:0…
APOC1_MOUSE	P34928	Apoc1	Apolipoprotein C-I	0	250	0	337.5	345.9	329.6	262.6	409.6	307.9	158.781	337.667	326.7	250	337.667	326.7	2.12662	0.017671	1	2.05755	0.056296	0	0.967522	0.814288	0	GO:0005783,endoplasmic reticulum;GO:0005576,extracellular region;GO:0034364,high-density lipoprotein particle;GO:0034361,very-low-density lipoprotein particle	GO:0005504,fatty acid binding;GO:0004859,phospholipase inhibitor activity	GO:0033344,cholesterol efflux;GO:0008203,cholesterol metabolic process;GO:0034382,chylomicron remnant clearance;GO:0042157,lipoprotein metabolic process;GO:0032375,negative regulation of cholesterol transport;GO:0045717,negative regulation of fatty acid biosynthetic process;GO:0050995,negative regulation of lipid catabolic process;GO:0051005,negative regulation of lipoprotein lipase activity;GO:0…	mmu:11812,path:mmu04979,Cholesterol metabolism
E9PUA7_MOUSE	E9PUA7	Tpd52	Tumor protein D52	78	84	99	97.4	82	67.7	87.4	84.5	81.1	87	82.3667	84.3333	87	82.3667	84.3333	0.946743	0.684831	0	0.969349	0.702852	0	1.02388	0.833491	0	GO:0005737,cytoplasm;GO:0005783,endoplasmic reticulum;GO:0098978,glutamatergic synapse;GO:0048471,perinuclear region of cytoplasm;GO:0045202,synapse;GO:0016021,integral component of membrane	GO:0005509,calcium ion binding;GO:0042802,identical protein binding;GO:0042803,protein homodimerization activity	GO:0030183,B cell differentiation;GO:0008284,positive regulation of cell population proliferation
HPCL4_MOUSE	Q8BGZ1	Hpcal4	Hippocalcin-like protein 4	0	1549.2	0	1721.8	1479.2	1684.2	1453.3	1514.9	1366.9	584.274	1628.4	1445.03	1549.2	1628.4	1445.03	2.78705	0.099292	0	2.47321	0.150202	0	0.887395	0.102057	0		GO:0005246,calcium channel regulator activity;GO:0005509,calcium ion binding;GO:0008022,protein C-terminus binding;GO:0019904,protein domain specific binding	GO:0007165,signal transduction
SNX17_MOUSE	Q8BVL3	Snx17	Sorting nexin-17	192.2	196.2	235.9	203.3	185.3	191.6	168	187.3	190.3	208.1	193.4	181.867	208.1	193.4	181.867	0.929361	0.380034	0	0.873939	0.167938	0	0.940365	0.258066	0	GO:0005737,cytoplasm;GO:0031410,cytoplasmic vesicle;GO:0030659,cytoplasmic vesicle membrane;GO:0005829,cytosol;GO:0005769,early endosome;GO:0005768,endosome;GO:0010008,endosome membrane;GO:0005794,Golgi apparatus;GO:0043231,intracellular membrane-bounded organelle;GO:0032991,protein-containing complex;GO:0016021,integral component of membrane;GO:0005856,cytoskeleton	GO:0050750,low-density lipoprotein particle receptor binding;GO:0035091,phosphatidylinositol binding;GO:0008022,protein C-terminus binding	GO:0035904,aorta development;GO:0003279,cardiac septum development;GO:0060976,coronary vasculature development;GO:0032456,endocytic recycling;GO:0006886,intracellular protein transport;GO:0006898,receptor-mediated endocytosis;GO:1990126,retrograde transport;GO:0007165,signal transduction
G5E8B6_MOUSE	G5E8B6	Kirrel3	Kin of IRRE-like protein 3	290.7	303.6	307.7	307.8	275	285	240.5	295.5	275.8	300.667	289.267	270.6	300.667	289.267	270.6	0.962084	0.357575	0	0.9	0.149553	0	0.935469	0.376718	0	GO:0016021,integral component of membrane;GO:0030424,axon;GO:0030425,dendrite;GO:0043198,dendritic shaft;GO:0005576,extracellular region;GO:0005886,plasma membrane;GO:0008021,synaptic vesicle	GO:0030165,PDZ domain binding	GO:0072102,glomerulus morphogenesis;GO:0030097,hemopoiesis;GO:0021766,hippocampus development;GO:0007156,homophilic cell adhesion via plasma membrane adhesion molecules;GO:0002121,inter-male aggressive behavior;GO:0001764,neuron migration;GO:0048812,neuron projection morphogenesis;GO:0021740,principal sensory nucleus of trigeminal nerve development;GO:0007416,synapse assembly
PMM2_MOUSE	Q9Z2M7	Pmm2	Phosphomannomutase 2	0	0	0	0	0	0	0	0	374.6	320.663	229.951	292.507			374.6	0.717113	0.295599	0	0.912193	0.755339	0	1.27204	0.24566	0	GO:0005737,cytoplasm;GO:0005829,cytosol;GO:0043025,neuronal cell body;GO:0005654,nucleoplasm	GO:0004615,phosphomannomutase activity	GO:0009298,GDP-mannose biosynthetic process;GO:0006013,mannose metabolic process;GO:0006487,protein N-linked glycosylation;GO:0045047,protein targeting to ER	mmu:54128,path:mmu00051,Fructose and mannose metabolism;mmu:54128,path:mmu00520,Amino sugar and nucleotide sugar metabolism
F8WIZ7_MOUSE	F8WIZ7	Osbpl6	Oxysterol-binding protein	108.1	102.4	107.3	109.1	867.6	1005.6	1261.5	1303.3	1253.8	105.933	660.767	1272.87	105.933	660.767	1272.87	6.23757	0.117345	0	12.0157	0	1	1.92635	0.093382	0	GO:0005829,cytosol;GO:0031901,early endosome membrane;GO:0005789,endoplasmic reticulum membrane;GO:0031965,nuclear membrane;GO:0097038,perinuclear endoplasmic reticulum;GO:0005886,plasma membrane;GO:0043231,intracellular membrane-bounded organelle;GO:0016020,membrane	GO:0015485,cholesterol binding;GO:0008289,lipid binding;GO:0032934,sterol binding;GO:0015248,sterol transporter activity	GO:0006869,lipid transport;GO:0032374,regulation of cholesterol transport
SPCS2_MOUSE	Q9CYN2	Spcs2	Signal peptidase complex subunit 2	0	270	0	244	216.3	233.8	206.4	253.6	243.6	195.622	231.367	234.533	270	231.367	234.533	1.18272	0.403456	0	1.19891	0.386723	0	1.01369	0.856993	0	GO:0016021,integral component of membrane;GO:0005787,signal peptidase complex	GO:0008233,peptidase activity	GO:0045047,protein targeting to ER;GO:0006465,signal peptide processing	mmu:66624,path:mmu03060,Protein export
SMCA4_MOUSE	Q3TKT4	Smarca4	Transcription activator BRG1	495.5	515.9	591.2	604	503.7	512.6	439.1	542.4	473.3	534.2	540.1	484.933	534.2	540.1	484.933	1.01104	0.898184	0	0.907775	0.306588	0	0.897858	0.279727	0	GO:0000792,heterochromatin;GO:0071565,nBAF complex;GO:0071564,npBAF complex;GO:0000790,nuclear chromatin;GO:0005719,nuclear euchromatin;GO:0005634,nucleus;GO:0005726,perichromatin fibrils;GO:0016514,SWI/SNF complex;GO:0005730,nucleolus	GO:0050681,androgen receptor binding;GO:0005524,ATP binding;GO:0016887,ATPase activity;GO:0003682,chromatin binding;GO:0003677,DNA binding;GO:0070182,DNA polymerase binding;GO:0008094,DNA-dependent ATPase activity;GO:0004386,helicase activity;GO:0070577,lysine-acetylated histone binding;GO:0002039,p53 binding;GO:0047485,protein N-terminus binding;GO:0044877,protein-containing complex binding;GO:0…	GO:0035904,aorta development;GO:0035887,aortic smooth muscle cell differentiation;GO:0043044,ATP-dependent chromatin remodeling;GO:0001832,blastocyst growth;GO:0001835,blastocyst hatching;GO:0001568,blood vessel development;GO:0000902,cell morphogenesis;GO:0006338,chromatin remodeling;GO:0060976,coronary vasculature development;GO:0060318,definitive erythrocyte differentiation;GO:0010424,DNA meth…	mmu:20586,path:mmu04714,Thermogenesis;mmu:20586,path:mmu05225,Hepatocellular carcinoma
CRBN_MOUSE	Q8C7D2	Crbn	Protein cereblon	0	0	0	0	76.7	97.6	75.9	75.1	431.7	219.035	177.909	194.233		87.15	194.233	0.812241	0.720497	0	0.88677	0.859587	0	1.09176	0.918346	0	GO:0031464,Cul4A-RING E3 ubiquitin ligase complex;GO:0005737,cytoplasm;GO:0016020,membrane;GO:0005634,nucleus;GO:0048471,perinuclear region of cytoplasm	GO:0044325,ion channel binding;GO:0046872,metal ion binding	GO:0034766,negative regulation of ion transmembrane transport;GO:0031333,negative regulation of protein-containing complex assembly;GO:0031334,positive regulation of protein-containing complex assembly;GO:0043161,proteasome-mediated ubiquitin-dependent protein catabolic process;GO:0016567,protein ubiquitination
ERO1A_MOUSE	Q8R180	Ero1a	ERO1-like protein alpha	0	326.4	0	343.9	326.6	350.5	280.4	292.2	281.3	189.057	340.333	284.633	326.4	340.333	284.633	1.80016	0.093862	0	1.50554	0.23747	0	0.836337	0.002313	0	GO:0005783,endoplasmic reticulum;GO:0030425,dendrite;GO:0005789,endoplasmic reticulum membrane;GO:0030176,integral component of endoplasmic reticulum membrane	GO:0016671,oxidoreductase activity;GO:0003756,protein disulfide isomerase activity;GO:0016491,oxidoreductase activity;GO:0015035,protein disulfide oxidoreductase activity	GO:0010260,animal organ senescence;GO:0050873,brown fat cell differentiation;GO:0045454,cell redox homeostasis;GO:0071456,cellular response to hypoxia;GO:0051085,chaperone cofactor-dependent protein refolding;GO:0030968,endoplasmic reticulum unfolded protein response;GO:0030198,extracellular matrix organization;GO:0070059,intrinsic apoptotic signaling pathway in response to endoplasmic reticulum …	mmu:50527,path:mmu04141,Protein processing in endoplasmic reticulum
UQCC2_MOUSE	Q9CQY6	Uqcc2	Ubiquinol-cytochrome-c reductase complex assembly factor 2	0	0	0	0	571.3	669.6	564.7	568	519.8	277.971	530.722	550.833		620.45	550.833	1.90927	0.059808	0	1.98162	0.000658	1	1.03789	0.843313	0	GO:0005743,mitochondrial inner membrane;GO:0005758,mitochondrial intermembrane space;GO:0005759,mitochondrial matrix;GO:0042645,mitochondrial nucleoid;GO:0005739,mitochondrion;GO:0016604,nuclear body		GO:0034551,mitochondrial respiratory chain complex III assembly;GO:1903364,positive regulation of cellular protein catabolic process;GO:0070131,positive regulation of mitochondrial translation;GO:0050796,regulation of insulin secretion;GO:0002082,regulation of oxidative phosphorylation;GO:2001014,regulation of skeletal muscle cell differentiation
METH_MOUSE	A6H5Y3	Mtr	Methionine synthase	0	0	0	0	200.1	172.6	149.2	221	190.9	136.57	196.978	187.033		186.35	187.033	1.44232	0.150891	0	1.36951	0.251279	0	0.949514	0.707643	0	GO:0016021,integral component of membrane;GO:0005829,cytosol	GO:0016597,amino acid binding;GO:0031419,cobalamin binding;GO:0005542,folic acid binding;GO:0008705,methionine synthase activity;GO:0008168,methyltransferase activity;GO:0008270,zinc ion binding	GO:0031103,axon regeneration;GO:0071732,cellular response to nitric oxide;GO:0009235,cobalamin metabolic process;GO:0050667,homocysteine metabolic process;GO:0009086,methionine biosynthetic process;GO:0006555,methionine metabolic process;GO:0006479,protein methylation;GO:0048678,response to axon injury;GO:0046653,tetrahydrofolate metabolic process	mmu:238505,path:mmu00270,Cysteine and methionine metabolism;mmu:238505,path:mmu00450,Selenocompound metabolism;mmu:238505,path:mmu00670,One carbon pool by folate
A2ALS7_MOUSE	A2ALS7	Rap1gap	Rap1 GTPase-activating protein 1 (Fragment)	567.5	593.5	594.3	662.7	603.1	703.9	588.8	644.1	581.1	585.1	656.567	604.667	585.1	656.567	604.667	1.12214	0.079471	0	1.03344	0.418339	0	0.920952	0.216001	0	GO:0030424,axon;GO:0005829,cytosol;GO:0030425,dendrite;GO:0005769,early endosome;GO:0016020,membrane;GO:0043025,neuronal cell body;GO:0000139,Golgi membrane	GO:0005096,GTPase activator activity;GO:0030695,GTPase regulator activity;GO:0042803,protein homodimerization activity;GO:0017016,Ras GTPase binding	GO:0051056,regulation of small GTPase mediated signal transduction;GO:1990792,cellular response to glial cell derived neurotrophic factor;GO:1904425,negative regulation of GTP binding;GO:0045665,negative regulation of neuron differentiation;GO:1904442,negative regulation of thyroid gland epithelial cell proliferation;GO:1903697,negative regulation of microvillus assembly;GO:0022409,positive regul…	mmu:110351,path:mmu04015,Rap1 signaling pathway
PP2BC_MOUSE	P48455	Ppp3cc	Serine/threonine-protein phosphatase 2B catalytic subunit gamma isoform	274.4	292.2	287.5	305.7	270.7	265.9	248.5	269.1	241.5	284.7	280.767	253.033	284.7	280.767	253.033	0.986184	0.787198	0	0.888772	0.032417	0	0.901223	0.138795	0	GO:0005955,calcineurin complex;GO:0005737,cytoplasm;GO:0098978,glutamatergic synapse;GO:0098793,presynapse;GO:0099523,presynaptic cytosol	GO:0033192,calmodulin-dependent protein phosphatase activity;GO:0005516,calmodulin binding;GO:0046872,metal ion binding	GO:0097720,calcineurin-mediated signaling;GO:0007420,brain development;GO:0033173,calcineurin-NFAT signaling cascade;GO:1900244,positive regulation of synaptic vesicle endocytosis;GO:0006470,protein dephosphorylation;GO:1900242,regulation of synaptic vesicle endocytosis	mmu:19057,path:mmu04010,MAPK signaling pathway;mmu:19057,path:mmu04310,Wnt signaling pathway;mmu:19057,path:mmu04370,VEGF signaling pathway;mmu:19057,path:mmu04020,Calcium signaling pathway;mmu:19057,path:mmu04022,cGMP-PKG signaling pathway;mmu:19057,path:mmu04114,Oocyte meiosis;mmu:19057,path:mmu04218,Cellular senescence;mmu:19057,path:mmu04625,C-type lectin receptor signaling pathway;mmu:19057,…
DBND2_MOUSE	Q9CRD4	Dbndd2	Dysbindin domain-containing protein 2	254	279.8	263.2	241.2	259.7	317.2	214.3	216.3	189.3	265.667	272.7	206.633	265.667	272.7	206.633	1.02647	0.784877	0	0.777792	0.00684	-1	0.757731	0.054131	0	GO:0005737,cytoplasm		GO:0006469,negative regulation of protein kinase activity
SUN1_MOUSE	Q9D666	Sun1	SUN domain-containing protein 1	101.3	94.3	88.6	90.2	99.3	115.2	83.3	85.8	71.8	94.7333	101.567	80.3	94.7333	101.567	80.3	1.07213	0.450324	0	0.847643	0.063396	0	0.790614	0.066258	0	GO:0005639,integral component of nuclear inner membrane;GO:0034993,meiotic nuclear membrane microtubule tethering complex;GO:0002080,acrosomal membrane;GO:0005737,cytoplasm;GO:0016021,integral component of membrane;GO:0043231,intracellular membrane-bounded organelle;GO:0005635,nuclear envelope;GO:0031965,nuclear membrane;GO:0005634,nucleus;GO:0002081,outer acrosomal membrane	GO:0005521,lamin binding;GO:0043495,protein-membrane adaptor activity	GO:0051642,centrosome localization;GO:0070197,meiotic attachment of telomere to nuclear envelope;GO:0006998,nuclear envelope organization;GO:0090292,nuclear matrix anchoring at nuclear membrane;GO:0021817,nucleokinesis involved in cell motility in cerebral cortex radial glia guided migration;GO:0001503,ossification;GO:0009612,response to mechanical stimulus;GO:0007283,spermatogenesis;GO:0007129,s…
A1AT2_MOUSE	P22599	Serpina1b	Alpha-1-antitrypsin 1-2	0	0	0	0	0	0	0	0	476	189.936	209.589	269.533			476	1.10347	0.368989	0	1.41907	0.488253	0	1.286	0.59641	0	GO:0005783,endoplasmic reticulum;GO:0005576,extracellular region;GO:0005615,extracellular space;GO:0005794,Golgi apparatus;GO:0043231,intracellular membrane-bounded organelle	GO:0004866,endopeptidase inhibitor activity;GO:0042802,identical protein binding;GO:0002020,protease binding;GO:0004867,serine-type endopeptidase inhibitor activity	GO:0006953,acute-phase response;GO:0001701,in utero embryonic development;GO:0010951,negative regulation of endopeptidase activity;GO:0006487,protein N-linked glycosylation;GO:0034097,response to cytokine;GO:0043434,response to peptide hormone	mmu:20701,path:mmu04610,Complement and coagulation cascades
IPO13_MOUSE	Q8K0C1	Ipo13	Importin-13	0	0	0	0	0	0	198.6	237.9	236.1	136.65	197.171	224.2			224.2	1.44289	0.06625	0	1.64068	0.002827	1	1.13708	0.374202	0	GO:0005737,cytoplasm;GO:0005634,nucleus	GO:0035259,glucocorticoid receptor binding;GO:0008536,Ran GTPase binding	GO:0006606,protein import into nucleus
TMX4_MOUSE	Q8C0L0	Tmx4	Thioredoxin-related transmembrane protein 4	1065.6	1031.9	1037.6	1078.6	1071.1	1231.1	978.6	1034.9	942.6	1045.03	1126.93	985.367	1045.03	1126.93	985.367	1.07837	0.198244	0	0.942905	0.107078	0	0.874379	0.073227	0	GO:0016021,integral component of membrane;GO:0005637,nuclear inner membrane		GO:0045454,cell redox homeostasis;GO:0055114,oxidation-reduction process
TMM68_MOUSE	Q9D850	Tmem68	Transmembrane protein 68	209.6	191.4	222.3	214.5	187	195.8	177	192.5	182.6	207.767	199.1	184.033	207.767	199.1	184.033	0.958287	0.513075	0	0.885769	0.077474	0	0.924326	0.180109	0	GO:0016021,integral component of membrane	GO:0016746,transferase activity
B3A3_MOUSE	P16283	Slc4a3	Anion exchange protein 3	32.9	31.9	33	31.4	36.6	44.5	32.6	30.6	21.7	32.6	37.5	28.3	32.6	37.5	28.3	1.15031	0.269351	0	0.868098	0.270841	0	0.754667	0.143906	0	GO:0016020,membrane;GO:0016021,integral component of membrane;GO:0009897,external side of plasma membrane;GO:0005886,plasma membrane	GO:0005452,inorganic anion exchanger activity;GO:0015301,anion;GO:0015106,bicarbonate transmembrane transporter activity;GO:0019899,enzyme binding	GO:0015701,bicarbonate transport;GO:0061337,cardiac conduction;GO:0051453,regulation of intracellular pH
GBG13_MOUSE	Q9JMF3	Gng13	Guanine nucleotide-binding protein G(I)/G(S)/G(O) subunit gamma-13	0	0	0	0	0	0	0	0	284.4	177.16	174.976	207.688			284.4	0.987668	0.971499	0	1.17231	0.630284	0	1.18695	0.576349	0	GO:0030425,dendrite;GO:0005834,heterotrimeric G-protein complex;GO:0016020,membrane	GO:0031681,G-protein beta-subunit binding;GO:0003924,GTPase activity	GO:0007200,phospholipase C-activating G protein-coupled receptor signaling pathway;GO:0050909,sensory perception of taste	mmu:64337,path:mmu04014,Ras signaling pathway;mmu:64337,path:mmu04371,Apelin signaling pathway;mmu:64337,path:mmu04151,PI3K-Akt signaling pathway;mmu:64337,path:mmu04062,Chemokine signaling pathway;mmu:64337,path:mmu04926,Relaxin signaling pathway;mmu:64337,path:mmu04724,Glutamatergic synapse;mmu:64337,path:mmu04727,GABAergic synapse;mmu:64337,path:mmu04725,Cholinergic synapse;mmu:64337,path:mmu0…
WDR53_MOUSE	Q9DB94	Wdr53	WD repeat-containing protein 53	63.9	62.6	69.2	60	56.3	58	54	53.9	54.2	65.2333	58.1	54.0333	65.2333	58.1	54.0333	0.890649	0.035429	0	0.828309	0.005179	-1	0.930006	0.019263	0
VPS36_MOUSE	Q91XD6	Vps36	Vacuolar protein-sorting-associated protein 36	0	0	0	0	619.8	738.8	601	722.9	608.8	160.63	513.501	644.233		679.3	644.233	3.1968	0.10564	0	4.01067	0.00026	1	1.25459	0.493875	0	GO:0005829,cytosol;GO:0005768,endosome;GO:0000814,ESCRT II complex;GO:0005770,late endosome;GO:0031902,late endosome membrane;GO:0005764,lysosome;GO:0005634,nucleus	GO:0032266,phosphatidylinositol-3-phosphate binding;GO:0008022,protein C-terminus binding;GO:0043130,ubiquitin binding	GO:0016197,endosomal transport;GO:0043328,protein transport to vacuole involved in ubiquitin-dependent protein catabolic process via the multivesicular body sorting pathway	mmu:70160,path:mmu04144,Endocytosis
HPLN2_MOUSE	Q9ESM3	Hapln2	Hyaluronan and proteoglycan link protein 2	189.6	226	214.3	193.4	216.1	203.2	187.1	204.8	169.9	209.967	204.233	187.267	209.967	204.233	187.267	0.972694	0.672271	0	0.891888	0.197854	0	0.916925	0.231243	0	GO:0031012,extracellular matrix	GO:0005540,hyaluronic acid binding	GO:0007155,cell adhesion;GO:0007417,central nervous system development;GO:0008065,establishment of blood-nerve barrier;GO:0085029,extracellular matrix assembly;GO:0001501,skeletal system development
TIM16_MOUSE	Q9CQV1	Pam16	Mitochondrial import inner membrane translocase subunit TIM16	0	0	0	0	0	0	0	0	109.8	148.799	290.2	173.504			109.8	1.95028	0.032565	1	1.16603	0.58389	0	0.597878	0.074696	0	GO:0005737,cytoplasm;GO:0031314,extrinsic component of mitochondrial inner membrane;GO:0005743,mitochondrial inner membrane;GO:0005759,mitochondrial matrix;GO:0005739,mitochondrion;GO:0001405,PAM complex;GO:0032991,protein-containing complex;GO:0005744,TIM23 mitochondrial import inner membrane translocase complex		GO:0071897,DNA biosynthetic process;GO:1902511,negative regulation of apoptotic DNA fragmentation;GO:0043066,negative regulation of apoptotic process;GO:2001234,negative regulation of apoptotic signaling pathway;GO:0032780,negative regulation of ATPase activity;GO:0090201,negative regulation of release of cytochrome c from mitochondria;GO:0001503,ossification;GO:0030150,protein import into mitoch…
GP162_MOUSE	Q3UN16	Gpr162	Probable G-protein coupled receptor 162	269.6	287.3	291.1	303.7	293	273.9	252.6	274.7	252.3	282.667	290.2	259.867	282.667	290.2	259.867	1.02665	0.529204	0	0.91934	0.083616	0	0.895474	0.056954	0	GO:0016021,integral component of membrane;GO:0005886,plasma membrane	GO:0004930,G protein-coupled receptor activity
ALD1_MOUSE	P21300	Akr1b7	Aldo-keto reductase family 1 member B7	0	0	0	0	0	0	0	0	426.2	225.039	223.183	265.934			426.2	0.991753	0.977276	0	1.18173	0.666968	0	1.19155	0.674353	0	GO:0005829,cytosol;GO:0005739,mitochondrion	GO:0008106,alcohol dehydrogenase (NADP+) activity;GO:0004032,alditol;GO:0016491,oxidoreductase activity	GO:0044255,cellular lipid metabolic process	mmu:11997,path:mmu00040,Pentose and glucuronate interconversions;mmu:11997,path:mmu00051,Fructose and mannose metabolism;mmu:11997,path:mmu00052,Galactose metabolism;mmu:11997,path:mmu00561,Glycerolipid metabolism;mmu:11997,path:mmu00790,Folate biosynthesis
SLIK3_MOUSE	Q810B9	Slitrk3	SLIT and NTRK-like protein 3	157.4	163.7	142.6	171.5	147.9	153.8	134.1	154.9	143.7	154.567	157.733	144.233	154.567	157.733	144.233	1.02049	0.754502	0	0.933146	0.299374	0	0.914413	0.220058	0	GO:0098982,GABA-ergic synapse;GO:0016021,integral component of membrane;GO:0099061,integral component of postsynaptic density membrane;GO:0099055,integral component of postsynaptic membrane;GO:0099060,integral component of postsynaptic specialization membrane		GO:0007409,axonogenesis;GO:0051965,positive regulation of synapse assembly;GO:1905606,regulation of presynapse assembly;GO:0099560,synaptic membrane adhesion
G3X8T9_MOUSE	G3X8T9	Serpina3n	Serine protease inhibitor A3N	0	0	0	0	308.2	317	261.2	323.9	288.4	247.213	314.699	291.167		312.6	291.167	1.27299	0.048223	1	1.17779	0.215639	0	0.925223	0.271174	0	GO:0005576,extracellular region;GO:0005615,extracellular space	GO:0004867,serine-type endopeptidase inhibitor activity	GO:0006953,acute-phase response;GO:0010951,negative regulation of endopeptidase activity;GO:0009617,response to bacterium;GO:0034097,response to cytokine;GO:0043434,response to peptide hormone
GET4_MOUSE	Q9D1H7	Get4	Golgi to ER traffic protein 4 homolog	201.6	164.4	194.8	194.8	174.7	207	164.7	216	169.9	186.933	192.167	183.533	186.933	192.167	183.533	1.028	0.741724	0	0.981812	0.872721	0	0.955074	0.670355	0	GO:0071818,BAT3 complex;GO:0005737,cytoplasm;GO:0005829,cytosol;GO:0005730,nucleolus;GO:0005654,nucleoplasm	GO:0051087,chaperone binding	GO:0045048,protein insertion into ER membrane;GO:0051220,cytoplasmic sequestering of protein;GO:1904378,maintenance of unfolded protein involved in ERAD pathway;GO:0071816,tail-anchored membrane protein insertion into ER membrane
A2A517_MOUSE	A2A517	Cyth1	Cytohesin-1 (Fragment)	221.4	225.3	224.1	255.3	208.9	231.9	189.4	212	197.2	223.6	232.033	199.533	223.6	232.033	199.533	1.03772	0.564501	0	0.892367	0.023219	0	0.859934	0.095308	0	GO:0005737,cytoplasm;GO:0005886,plasma membrane;GO:0005912,adherens junction;GO:0005923,bicellular tight junction;GO:0005829,cytosol;GO:0031234,extrinsic component of cytoplasmic side of plasma membrane;GO:0098888,extrinsic component of presynaptic membrane;GO:0031594,neuromuscular junction	GO:0005086,ARF guanyl-nucleotide exchange factor activity;GO:0008289,lipid binding	GO:0032012,regulation of ARF protein signal transduction;GO:0030155,regulation of cell adhesion;GO:0090162,establishment of epithelial cell polarity;GO:2000300,regulation of synaptic vesicle exocytosis	mmu:19157,path:mmu04072,Phospholipase D signaling pathway;mmu:19157,path:mmu04144,Endocytosis;mmu:19157,path:mmu05132,Salmonella infection
NCOR2_MOUSE	Q9WU42	Ncor2	Nuclear receptor corepressor 2	161.7	155.1	148	138.1	165.9	153.5	132.6	117.2	131.6	154.933	152.5	127.133	154.933	152.5	127.133	0.984294	0.799411	0	0.820568	0.011932	-1	0.833661	0.05507	0	GO:0016604,nuclear body;GO:0000790,nuclear chromatin;GO:0016363,nuclear matrix;GO:0017053,transcription repressor complex;GO:0005634,nucleus;GO:0000785,chromatin;GO:0000118,histone deacetylase complex;GO:0005654,nucleoplasm	GO:0003682,chromatin binding;GO:0003677,DNA binding;GO:0035259,glucocorticoid receptor binding;GO:0042826,histone deacetylase binding;GO:0005112,Notch binding;GO:0047485,protein N-terminus binding;GO:0044877,protein-containing complex binding;GO:0046965,retinoid X receptor binding;GO:0003714,transcription corepressor activity;GO:0035257,nuclear hormone receptor binding;GO:0016922,nuclear receptor…	GO:0044849,estrous cycle;GO:0007595,lactation;GO:0060766,negative regulation of androgen receptor signaling pathway;GO:1903799,negative regulation of production of miRNAs involved in gene silencing by miRNA;GO:0000122,negative regulation of transcription by RNA polymerase II;GO:0010565,regulation of cellular ketone metabolic process;GO:0032355,response to estradiol;GO:0010243,response to organoni…	mmu:20602,path:mmu04330,Notch signaling pathway;mmu:20602,path:mmu05169,Epstein-Barr virus infection
D3Z6D2_MOUSE	D3Z6D2	Stau2	Double-stranded RNA-binding protein Staufen homolog 2	0	0	0	0	373.7	338.9	329.9	361.8	350.9	184.94	297.308	347.533		356.3	347.533	1.60759	0.139561	0	1.87916	0.000448	1	1.16893	0.453594	0	GO:0030424,axon;GO:0005737,cytoplasm;GO:0010494,cytoplasmic stress granule;GO:0030425,dendrite;GO:0032839,dendrite cytoplasm;GO:0043198,dendritic shaft;GO:0005783,endoplasmic reticulum;GO:1990124,messenger ribonucleoprotein complex;GO:0005874,microtubule;GO:0043025,neuronal cell body;GO:0031965,nuclear membrane;GO:0005730,nucleolus;GO:0005634,nucleus	GO:0003725,double-stranded RNA binding;GO:0030544,Hsp70 protein binding;GO:0019894,kinesin binding;GO:0051019,mitogen-activated protein kinase binding;GO:0043022,ribosome binding;GO:0003723,RNA binding	GO:0098964,anterograde dendritic transport of messenger ribonucleoprotein complex;GO:0048592,eye morphogenesis;GO:0061003,positive regulation of dendritic spine morphogenesis;GO:1900454,positive regulation of long-term synaptic depression;GO:0051965,positive regulation of synapse assembly;GO:0032956,regulation of actin cytoskeleton organization;GO:0051489,regulation of filopodium assembly;GO:0010…
FKB1A_MOUSE	P26883	Fkbp1a	Peptidyl-prolyl cis-trans isomerase FKBP1A	104.6	110.4	104	109.1	109.7	120	107	111.1	109.9	106.333	112.933	109.333	106.333	112.933	109.333	1.06207	0.181384	0	1.02821	0.275323	0	0.968123	0.390396	0	GO:0043679,axon terminus;GO:0005737,cytoplasm;GO:0098562,cytoplasmic side of membrane;GO:0005829,cytosol;GO:0031312,extrinsic component of organelle membrane;GO:0043231,intracellular membrane-bounded organelle;GO:0016020,membrane;GO:1990425,ryanodine receptor complex;GO:0016529,sarcoplasmic reticulum;GO:0033017,sarcoplasmic reticulum membrane;GO:0045202,synapse;GO:0030018,Z disc	GO:0003755,peptidyl-prolyl cis-trans isomerase activity;GO:0048185,activin binding;GO:0008144,drug binding;GO:0019899,enzyme binding;GO:0005528,FK506 binding;GO:0030544,Hsp70 protein binding;GO:0042802,identical protein binding;GO:0044325,ion channel binding;GO:0046332,SMAD binding;GO:0005160,transforming growth factor beta receptor binding;GO:0034713,type I transforming growth factor beta recept…	GO:1990000,amyloid fibril formation;GO:0061077,chaperone-mediated protein folding;GO:0019221,cytokine-mediated signaling pathway;GO:0003007,heart morphogenesis;GO:0060347,heart trabecula formation;GO:0006936,muscle contraction;GO:0032515,negative regulation of phosphoprotein phosphatase activity;GO:0001933,negative regulation of protein phosphorylation;GO:0032092,positive regulation of protein bi…
PALMD_MOUSE	Q9JHU2	Palmd	Palmdelphin	451.8	485.8	515.8	473.6	463.8	466.7	413.6	444.6	402.9	484.467	468.033	420.367	484.467	468.033	420.367	0.96608	0.429463	0	0.86769	0.045377	0	0.898155	0.020599	0	GO:0016020,membrane;GO:0005737,cytoplasm;GO:0030425,dendrite;GO:0043197,dendritic spine		GO:0008360,regulation of cell shape
Q5RJB9_MOUSE	Q5RJB9	Ppp4r3b	Serine/threonine-protein phosphatase 4 regulatory subunit 3B (Fragment)	0	176.1	0	210.3	194.6	176.4	155.6	160	156.3	201.295	193.767	157.3	176.1	193.767	157.3	0.962602	0.677443	0	0.781441	0.032757	-1	0.811801	0.021067	-1	GO:0005813,centrosome;GO:0005737,cytoplasm;GO:0016607,nuclear speck;GO:0005654,nucleoplasm;GO:0005634,nucleus;GO:0030289,protein phosphatase 4 complex		GO:0045722,positive regulation of gluconeogenesis;GO:0006470,protein dephosphorylation;GO:0019216,regulation of lipid metabolic process	mmu:104570,path:mmu04922,Glucagon signaling pathway
CAB45_MOUSE	Q61112	Sdf4	45 kDa calcium-binding protein	0	0	0	0	404.4	419.5	374.6	421.3	394.1	156.858	336.277	396.667		411.95	396.667	2.14384	0.077893	0	2.52883	9.4e-05	1	1.17958	0.47671	0	GO:0005737,cytoplasm;GO:0005783,endoplasmic reticulum;GO:0005794,Golgi apparatus;GO:0005796,Golgi lumen;GO:0005770,late endosome	GO:0005509,calcium ion binding;GO:0042802,identical protein binding	GO:0017156,calcium-ion regulated exocytosis;GO:0021549,cerebellum development;GO:0045444,fat cell differentiation;GO:0045471,response to ethanol;GO:0009650,UV protection;GO:0070625,zymogen granule exocytosis
A2BDQ4_MOUSE	A2BDQ4	Epha7	Receptor protein-tyrosine kinase	84.8	70.3	92.2	77.2	75	89.5	66.4	67.9	57.7	82.4333	80.5667	64	82.4333	80.5667	64	0.977355	0.823865	0	0.776385	0.062033	0	0.794373	0.039883	-1	GO:0005887,integral component of plasma membrane;GO:0030425,dendrite;GO:0098978,glutamatergic synapse;GO:0098686,hippocampal mossy fiber to CA3 synapse;GO:0099061,integral component of postsynaptic density membrane;GO:0099060,integral component of postsynaptic specialization membrane;GO:0031594,neuromuscular junction;GO:0043005,neuron projection;GO:0043025,neuronal cell body;GO:0045211,postsynapt…	GO:0005524,ATP binding;GO:0005003,ephrin receptor activity;GO:0008046,axon guidance receptor activity;GO:0045499,chemorepellent activity;GO:0046875,ephrin receptor binding;GO:0005004,GPI-linked ephrin receptor activity;GO:0004713,protein tyrosine kinase activity;GO:0004714,transmembrane receptor protein tyrosine kinase activity;GO:0005005,transmembrane-ephrin receptor activity	GO:0006915,apoptotic process;GO:0007411,axon guidance;GO:0007420,brain development;GO:0048755,branching morphogenesis of a nerve;GO:0048013,ephrin receptor signaling pathway;GO:0007275,multicellular organism development;GO:0048671,negative regulation of collateral sprouting;GO:0051964,negative regulation of synapse assembly;GO:0072178,nephric duct morphogenesis;GO:0016310,phosphorylation;GO:00430…	mmu:13841,path:mmu04360,Axon guidance
FIG4_MOUSE	Q91WF7	Fig4	Polyphosphoinositide phosphatase	204.4	177.6	211.6	206.6	198.8	211.7	200.7	227.1	189.2	197.867	205.7	205.667	197.867	205.7	205.667	1.03959	0.515844	0	1.03942	0.636177	0	0.999838	0.997887	0	GO:0005783,endoplasmic reticulum;GO:0010008,endosome membrane;GO:0005794,Golgi apparatus;GO:0043231,intracellular membrane-bounded organelle;GO:0005811,lipid droplet;GO:0055037,recycling endosome	GO:0034593,phosphatidylinositol bisphosphate phosphatase activity;GO:0004438,phosphatidylinositol-3-phosphatase activity;GO:0043812,phosphatidylinositol-4-phosphate phosphatase activity	GO:0007626,locomotory behavior;GO:0032288,myelin assembly;GO:0031642,negative regulation of myelination;GO:0048666,neuron development;GO:0046488,phosphatidylinositol metabolic process;GO:0043473,pigmentation;GO:0010976,positive regulation of neuron projection development;GO:0007033,vacuole organization	mmu:103199,path:mmu00562,Inositol phosphate metabolism
MINP1_MOUSE	Q9Z2L6	Minpp1	Multiple inositol polyphosphate phosphatase 1	205.9	196.8	218.9	236.5	208.2	203.5	192.5	209.1	191.3	207.2	216.067	197.633	207.2	216.067	197.633	1.04279	0.505594	0	0.953829	0.328754	0	0.914687	0.193249	0	GO:0005788,endoplasmic reticulum lumen;GO:0005886,plasma membrane	GO:0003993,acid phosphatase activity;GO:0034417,bisphosphoglycerate 3-phosphatase activity;GO:0052826,inositol hexakisphosphate 2-phosphatase activity;GO:0052745,inositol phosphate phosphatase activity;GO:0030351,inositol-1;GO:0030352,inositol-1		mmu:17330,path:mmu00010,Glycolysis / Gluconeogenesis;mmu:17330,path:mmu00562,Inositol phosphate metabolism
RUXE_MOUSE	P62305	Snrpe	Small nuclear ribonucleoprotein E	620.6	655.8	668.1	705.2	623	665.4	575.2	621	616.5	648.167	664.533	604.233	648.167	664.533	604.233	1.02525	0.58605	0	0.932219	0.097261	0	0.90926	0.096338	0	GO:0005829,cytosol;GO:0034709,methylosome;GO:0005634,nucleus;GO:0034715,pICln-Sm protein complex;GO:0071011,precatalytic spliceosome;GO:0034719,SMN-Sm protein complex;GO:0005685,U1 snRNP;GO:0005686,U2 snRNP;GO:0071007,U2-type catalytic step 2 spliceosome;GO:0071005,U2-type precatalytic spliceosome;GO:0005687,U4 snRNP;GO:0046540,U4/U6 x U5 tri-snRNP complex;GO:0005682,U5 snRNP;GO:0005683,U7 snRNP;…	GO:0003723,RNA binding;GO:1990446,U1 snRNP binding	GO:0042633,hair cycle;GO:0000398,mRNA splicing;GO:0000387,spliceosomal snRNP assembly	mmu:20643,path:mmu03040,Spliceosome
PURA2_MOUSE	P46664	Adss2	Adenylosuccinate synthetase isozyme 2	0	0	0	0	597.8	589.8	529.9	675.6	588.7	153.971	442.914	598.067		593.8	598.067	2.87661	0.129261	0	3.88429	0.00057	1	1.3503	0.378231	0	GO:0005737,cytoplasm;GO:0005829,cytosol;GO:0005739,mitochondrion;GO:0005886,plasma membrane	GO:0004019,adenylosuccinate synthase activity;GO:0005525,GTP binding;GO:0000287,magnesium ion binding	GO:0044208,'de novo' AMP biosynthetic process;GO:0006167,AMP biosynthetic process;GO:0006531,aspartate metabolic process;GO:0071257,cellular response to electrical stimulus;GO:0046040,IMP metabolic process;GO:0006164,purine nucleotide biosynthetic process;GO:0060359,response to ammonium ion;GO:0014074,response to purine-containing compound	mmu:11566,path:mmu00230,Purine metabolism;mmu:11566,path:mmu00250,Alanine, aspartate and glutamate metabolism
R3HC1_MOUSE	Q8BSI6	R3hcc1	R3H and coiled-coil domain-containing protein 1	125.9	155.3	166.4	164.1	156.8	143.3	119.9	136.2	126	149.2	154.733	127.367	149.2	154.733	127.367	1.03709	0.703551	0	0.853664	0.167961	0	0.823137	0.023991	-1		GO:0003676,nucleic acid binding
A0A0R4J102_MOUSE	A0A0R4J102	Cpeb3	Cytoplasmic polyadenylation element-binding protein 3	32.3	32.8	30.2	31.9	28	31	529	487.2	501.8	31.7667	30.3	506	31.7667	30.3	506	0.95383	0.360876	0	15.9286	3e-06	1	16.6997	3e-06	1	GO:0030014,CCR4-NOT complex;GO:0005737,cytoplasm;GO:0030425,dendrite;GO:0005634,nucleus;GO:0098794,postsynapse;GO:0097440,apical dendrite;GO:1990124,messenger ribonucleoprotein complex;GO:0043005,neuron projection;GO:0014069,postsynaptic density;GO:0045202,synapse	GO:0003730,mRNA 3'-UTR binding;GO:0045182,translation regulator activity;GO:0008135,translation factor activity;GO:0035925,mRNA 3'-UTR AU-rich region binding;GO:0043022,ribosome binding;GO:0003723,RNA binding;GO:0035613,RNA stem-loop binding;GO:0000900,translation repressor activity	GO:0061158,3'-UTR-mediated mRNA destabilization;GO:0071230,cellular response to amino acid stimulus;GO:0000122,negative regulation of transcription by RNA polymerase II;GO:0060213,positive regulation of nuclear-transcribed mRNA poly(A) tail shortening;GO:0007616,long-term memory;GO:2000766,negative regulation of cytoplasmic translation;GO:1900248,negative regulation of cytoplasmic translational e…	mmu:208922,path:mmu04114,Oocyte meiosis;mmu:208922,path:mmu04914,Progesterone-mediated oocyte maturation
CC85B_MOUSE	Q6PDY0	Ccdc85b	Coiled-coil domain-containing protein 85B	0	0	0	0	0	0	341.9	409.4	379.4	136.446	181.458	376.9			376.9	1.32988	0.232226	0	2.76226	0.000528	1	2.07707	0.005053	1	GO:0005912,adherens junction;GO:0005813,centrosome;GO:0005737,cytoplasm;GO:0005634,nucleus		GO:0030154,cell differentiation;GO:0030308,negative regulation of cell growth;GO:0045599,negative regulation of fat cell differentiation;GO:0045892,negative regulation of transcription
SEC62_MOUSE	Q8BU14	Sec62	Translocation protein SEC62	485.8	476.5	526.8	540.9	480	495.3	442.5	521.8	438.9	496.367	505.4	467.733	496.367	505.4	467.733	1.0182	0.725138	0	0.942314	0.410071	0	0.925472	0.312969	0	GO:0005783,endoplasmic reticulum;GO:0030176,integral component of endoplasmic reticulum membrane;GO:0016020,membrane		GO:0006620,posttranslational protein targeting to endoplasmic reticulum membrane;GO:0031204,posttranslational protein targeting to membrane	mmu:69276,path:mmu03060,Protein export;mmu:69276,path:mmu04141,Protein processing in endoplasmic reticulum
Q9D6D0_MOUSE	Q9D6D0	Slc25a27	Solute carrier family 25, member 27	310.6	349.1	357.8	362.1	325.9	316.4	309.3	332.8	314.7	339.167	334.8	318.933	339.167	334.8	318.933	0.987125	0.838677	0	0.940344	0.278508	0	0.952609	0.367491	0	GO:0045177,apical part of cell;GO:0031966,mitochondrial membrane;GO:0005739,mitochondrion;GO:0043025,neuronal cell body;GO:0016021,integral component of membrane		GO:0035356,cellular triglyceride homeostasis;GO:0043066,negative regulation of apoptotic process;GO:0051562,negative regulation of mitochondrial calcium ion concentration;GO:0010917,negative regulation of mitochondrial membrane potential;GO:0070997,neuron death;GO:0008284,positive regulation of cell population proliferation;GO:0046324,regulation of glucose import;GO:0009409,response to cold;GO:00…
NS1BP_MOUSE	Q920Q8	Ivns1abp	Influenza virus NS1A-binding protein homolog	109.5	116.3	121.6	126.2	116.4	132.3	115.1	118.2	122.6	115.8	124.967	118.633	115.8	124.967	118.633	1.07916	0.189527	0	1.02447	0.529711	0	0.94932	0.2835	0	GO:0005856,cytoskeleton;GO:0005829,cytosol;GO:0005634,nucleus		GO:2001243,negative regulation of intrinsic apoptotic signaling pathway;GO:0031397,negative regulation of protein ubiquitination;GO:0009615,response to virus;GO:0008380,RNA splicing
BNIP3_MOUSE	O55003	Bnip3	BCL2/adenovirus E1B 19 kDa protein-interacting protein 3	40.8	34.4	37.6	31	33.4	38	30.6	35.6	30.3	37.6	34.1333	32.1667	37.6	34.1333	32.1667	0.907801	0.277824	0	0.855496	0.097637	0	0.942383	0.50346	0	GO:0016021,integral component of membrane;GO:0005740,mitochondrial envelope;GO:0005737,cytoplasm;GO:0030425,dendrite;GO:0005783,endoplasmic reticulum;GO:0031307,integral component of mitochondrial outer membrane;GO:0031966,mitochondrial membrane;GO:0005741,mitochondrial outer membrane;GO:0005739,mitochondrion;GO:0005635,nuclear envelope;GO:0005654,nucleoplasm;GO:0005634,nucleus;GO:0014069,postsyn…	GO:0051020,GTPase binding;GO:0042802,identical protein binding;GO:0042803,protein homodimerization activity	GO:0043065,positive regulation of apoptotic process;GO:0006915,apoptotic process;GO:0048102,autophagic cell death;GO:0050873,brown fat cell differentiation;GO:0010659,cardiac muscle cell apoptotic process;GO:0008219,cell death;GO:0071279,cellular response to cobalt ion;GO:0070301,cellular response to hydrogen peroxide;GO:0071456,cellular response to hypoxia;GO:0071260,cellular response to mechani…	mmu:12176,path:mmu04068,FoxO signaling pathway;mmu:12176,path:mmu04140,Autophagy - animal;mmu:12176,path:mmu04137,Mitophagy - animal;mmu:12176,path:mmu05134,Legionellosis
AKAP8_MOUSE	Q9DBR0	Akap8	A-kinase anchor protein 8	132	116.3	126.6	134.3	131.4	117.9	116.9	121.8	113.8	124.967	127.867	117.5	124.967	127.867	117.5	1.02321	0.693257	0	0.940251	0.221479	0	0.918926	0.1359	0	GO:0005634,nucleus;GO:0000793,condensed chromosome;GO:0001939,female pronucleus;GO:0005794,Golgi apparatus;GO:0005739,mitochondrion;GO:0000790,nuclear chromatin;GO:0016363,nuclear matrix;GO:0005730,nucleolus;GO:0005654,nucleoplasm	GO:0003677,DNA binding;GO:0003682,chromatin binding;GO:0003690,double-stranded DNA binding;GO:0042826,histone deacetylase binding;GO:0051059,NF-kappaB binding;GO:0034237,protein kinase A regulatory subunit binding;GO:0008270,zinc ion binding	GO:0044839,cell cycle G2/M phase transition;GO:0071222,cellular response to lipopolysaccharide;GO:0071380,cellular response to prostaglandin E stimulus;GO:0045087,innate immune response;GO:0007076,mitotic chromosome condensation;GO:0032720,negative regulation of tumor necrosis factor production;GO:0031065,positive regulation of histone deacetylation;GO:0015031,protein transport;GO:0033127,regulat…
E9QN77_MOUSE	E9QN77	Tmub1	Transmembrane and ubiquitin-like domain-containing protein 1	138.7	155.1	138.5	142.6	126.6	145.5	127.9	148.9	149.5	144.1	138.233	142.1	144.1	138.233	142.1	0.959288	0.506468	0	0.986121	0.834719	0	1.02797	0.696427	0	GO:0005829,cytosol;GO:0016021,integral component of membrane;GO:0005815,microtubule organizing center;GO:0005730,nucleolus;GO:0005654,nucleoplasm;GO:0045211,postsynaptic membrane;GO:0055037,recycling endosome		GO:0030433,ubiquitin-dependent ERAD pathway
MTMR7_MOUSE	Q9Z2C9	Mtmr7	Myotubularin-related protein 7	164	174.2	197.5	179.3	164.3	176.2	155.7	182.5	160.8	178.567	173.267	166.333	178.567	173.267	166.333	0.970319	0.652738	0	0.931492	0.395873	0	0.959985	0.501804	0	GO:0005737,cytoplasm;GO:0005829,cytosol;GO:0012505,endomembrane system;GO:0016020,membrane	GO:0052866,phosphatidylinositol phosphate phosphatase activity;GO:0004725,protein tyrosine phosphatase activity;GO:0016312,inositol bisphosphate phosphatase activity;GO:0004438,phosphatidylinositol-3-phosphatase activity	GO:0046856,phosphatidylinositol dephosphorylation;GO:0046855,inositol phosphate dephosphorylation	mmu:54384,path:mmu00562,Inositol phosphate metabolism;mmu:54384,path:mmu04070,Phosphatidylinositol signaling system
FA98A_MOUSE	Q3TJZ6	Fam98a	Protein FAM98A	212	218	229	238.3	228.2	246.5	192.9	206.4	197.4	219.667	237.667	198.9	219.667	237.667	198.9	1.08194	0.068394	0	0.905463	0.031021	0	0.836886	0.004232	0	GO:0072669,tRNA-splicing ligase complex	GO:0008276,protein methyltransferase activity	GO:0032418,lysosome localization;GO:0008284,positive regulation of cell population proliferation;GO:0010628,positive regulation of gene expression;GO:1900029,positive regulation of ruffle assembly;GO:0006479,protein methylation
TOM40_MOUSE	Q9QYA2	Tomm40	Mitochondrial import receptor subunit TOM40 homolog	928.8	926.4	1006.5	1039.3	917.1	1053.8	999.6	1026.2	990.9	953.9	1003.4	1005.57	953.9	1003.4	1005.57	1.05189	0.384277	0	1.05416	0.142693	0	1.00216	0.963611	0	GO:0005829,cytosol;GO:0016021,integral component of membrane;GO:0032592,integral component of mitochondrial membrane;GO:0031307,integral component of mitochondrial outer membrane;GO:0005743,mitochondrial inner membrane;GO:0005741,mitochondrial outer membrane;GO:0005742,mitochondrial outer membrane translocase complex;GO:0005739,mitochondrion;GO:0046930,pore complex	GO:0005261,cation channel activity;GO:0015288,porin activity;GO:0070678,preprotein binding;GO:0008320,protein transmembrane transporter activity	GO:0043065,positive regulation of apoptotic process;GO:0030150,protein import into mitochondrial matrix;GO:0051204,protein insertion into mitochondrial membrane;GO:0006626,protein targeting to mitochondrion	mmu:53333,path:mmu05014,Amyotrophic lateral sclerosis (ALS)
A0A494BBA8_MOUSE	A0A494BBA8	Fau	40S ribosomal protein S30	0	0	0	0	0	0	0	0	1542	144.913	128.119	716.575			1542	0.884114	0.53084	0	4.94488	0.238984	0	5.59303	0.227269	0	GO:0022627,cytosolic small ribosomal subunit;GO:0005615,extracellular space;GO:0005840,ribosome	GO:0003735,structural constituent of ribosome	GO:0019731,antibacterial humoral response;GO:0061844,antimicrobial humoral immune response mediated by antimicrobial peptide;GO:0050830,defense response to Gram-positive bacterium;GO:0002227,innate immune response in mucosa;GO:0006412,translation	mmu:14109,path:mmu03010,Ribosome
PTCD3_MOUSE	Q14C51	Ptcd3	Pentatricopeptide repeat domain-containing protein 3, mitochondrial	199.7	185.7	212.4	193.5	193.2	199.8	186.3	192.6	172.4	199.267	195.5	183.767	199.267	195.5	183.767	0.981097	0.662491	0	0.922215	0.187096	0	0.939983	0.138035	0	GO:0005829,cytosol;GO:0005739,mitochondrion;GO:0005654,nucleoplasm;GO:0005886,plasma membrane;GO:0005840,ribosome	GO:0043024,ribosomal small subunit binding;GO:0019843,rRNA binding	GO:0032543,mitochondrial translation;GO:0006417,regulation of translation
ZN706_MOUSE	Q9D115	Znf706	Zinc finger protein 706	0	0	0	0	0	0	0	0	162.9	223.539	187.887	210.454			162.9	0.840513	0.813313	0	0.941465	0.886226	0	1.12011	0.857531	0	GO:0005737,cytoplasm;GO:0005634,nucleus	GO:0046872,metal ion binding	GO:1902455,negative regulation of stem cell population maintenance;GO:0045892,negative regulation of transcription;GO:0006417,regulation of translation
F6TKU5_MOUSE	F6TKU5	Nsmf	NMDA receptor synaptonuclear-signaling and neuronal migration factor	104.6	100	108.2	1313.1	186.7	173.8	101.9	106.3	95.9	104.267	557.867	101.367	104.267	557.867	101.367	5.35038	0.295957	0	0.972187	0.49174	0	0.181704	0.293306	0	GO:0097440,apical dendrite;GO:0030863,cortical cytoskeleton;GO:0005737,cytoplasm;GO:0030425,dendrite;GO:0043197,dendritic spine;GO:0098978,glutamatergic synapse;GO:0016020,membrane;GO:0043005,neuron projection;GO:0005635,nuclear envelope;GO:0005719,nuclear euchromatin;GO:0016363,nuclear matrix;GO:0031965,nuclear membrane;GO:0005654,nucleoplasm;GO:0005634,nucleus;GO:0043204,perikaryon;GO:0005886,p…	GO:0048306,calcium-dependent protein binding	GO:2001222,regulation of neuron migration;GO:0048168,regulation of neuronal synaptic plasticity;GO:0071230,cellular response to amino acid stimulus;GO:0071257,cellular response to electrical stimulus;GO:0071371,cellular response to gonadotropin stimulus;GO:2001224,positive regulation of neuron migration;GO:0035307,positive regulation of protein dephosphorylation;GO:0099527,postsynapse to nucleus …
CSTF2_MOUSE	Q8BIQ5	Cstf2	Cleavage stimulation factor subunit 2	0	0	0	0	423.2	447.8	430.9	427.9	377	119.222	347.518	411.933		435.5	411.933	2.9149	0.064533	0	3.45519	0.000323	1	1.18536	0.513649	0	GO:0005847,mRNA cleavage and polyadenylation specificity factor complex;GO:0071920,cleavage body;GO:0016604,nuclear body;GO:0005654,nucleoplasm	GO:0003723,RNA binding;GO:0003729,mRNA binding	GO:0006378,mRNA polyadenylation;GO:1990090,cellular response to nerve growth factor stimulus;GO:0098789,pre-mRNA cleavage required for polyadenylation	mmu:108062,path:mmu03015,mRNA surveillance pathway
A0A338P6I9_MOUSE	A0A338P6I9		Uncharacterized protein	176.1	197.3	230.9	208.4	178.7	204.9	173.2	202.8	199.8	201.433	197.333	191.933	201.433	197.333	191.933	0.979646	0.835485	0	0.952838	0.635018	0	0.972635	0.705057	0	GO:0016021,integral component of membrane
SRF_MOUSE	Q9JM73	Srf	Serum response factor	207.7	198.4	220.5	207.7	188.6	230.1	175.4	183.7	152	208.867	208.8	170.367	208.867	208.8	170.367	0.999681	0.996323	0	0.815672	0.028245	-1	0.815932	0.065845	0	GO:0005737,cytoplasm;GO:0000790,nuclear chromatin;GO:0005634,nucleus	GO:0003682,chromatin binding;GO:0031490,chromatin DNA binding;GO:0003677,DNA binding;GO:0001228,DNA-binding transcription activator activity;GO:0003700,DNA-binding transcription factor activity;GO:0000981,DNA-binding transcription factor activity;GO:0042826,histone deacetylase binding;GO:0070878,primary miRNA binding;GO:0042803,protein homodimerization activity;GO:0000978,RNA polymerase II cis-re…	GO:0030036,actin cytoskeleton organization;GO:0007015,actin filament organization;GO:0008306,associative learning;GO:0070830,bicellular tight junction assembly;GO:0001569,branching involved in blood vessel morphogenesis;GO:0060532,bronchus cartilage development;GO:0055003,cardiac myofibril assembly;GO:0060947,cardiac vascular smooth muscle cell differentiation;GO:0002042,cell migration involved i…	mmu:20807,path:mmu04010,MAPK signaling pathway;mmu:20807,path:mmu04022,cGMP-PKG signaling pathway;mmu:20807,path:mmu05203,Viral carcinogenesis;mmu:20807,path:mmu05166,Human T-cell leukemia virus 1 infection
A0A1Y7VJH3_MOUSE	A0A1Y7VJH3	Ppp1r13b	Apoptosis-stimulating of p53 protein 1 (Fragment)	0	251.7	0	258.6	240.2	221.7	216.7	234.3	224.2	220.055	240.167	225.067	251.7	240.167	225.067	1.09139	0.366049	0	1.02278	0.787534	0	0.937127	0.27018	0	GO:0005829,cytosol;GO:0005654,nucleoplasm;GO:0005634,nucleus;GO:0048471,perinuclear region of cytoplasm;GO:0005886,plasma membrane	GO:0008134,transcription factor binding;GO:0002039,p53 binding	GO:0006915,apoptotic process;GO:0045786,negative regulation of cell cycle;GO:0072332,intrinsic apoptotic signaling pathway by p53 class mediator;GO:1901216,positive regulation of neuron death
G3BP1_MOUSE	P97855	G3bp1	Ras GTPase-activating protein-binding protein 1	133.3	133.1	124.2	142.2	128.3	127.6	125.9	139.5	133.2	130.2	132.7	132.867	130.2	132.7	132.867	1.0192	0.67955	0	1.02048	0.61826	0	1.00126	0.979737	0	GO:0005737,cytoplasm;GO:0010494,cytoplasmic stress granule;GO:0005829,cytosol;GO:0005634,nucleus;GO:0043204,perikaryon;GO:1990904,ribonucleoprotein complex	GO:0005524,ATP binding;GO:0003677,DNA binding;GO:0003678,DNA helicase activity;GO:0004519,endonuclease activity;GO:0003729,mRNA binding;GO:0003724,RNA helicase activity	GO:0051607,defense response to virus;GO:0045087,innate immune response;GO:0090090,negative regulation of canonical Wnt signaling pathway;GO:0062029,positive regulation of stress granule assembly;GO:0034063,stress granule assembly;GO:0032606,type I interferon production
AGO1_MOUSE	Q8CJG1	Ago1	Protein argonaute-1	0	251.7	0	231.2	246	218.8	221.8	217.2	207.6	193.818	232	215.533	251.7	232	215.533	1.197	0.276231	0	1.11204	0.503416	0	0.929023	0.138148	0	GO:0005737,cytoplasm;GO:0005829,cytosol;GO:0005634,nucleus;GO:0000932,P-body;GO:0005844,polysome;GO:1990904,ribonucleoprotein complex;GO:0016442,RISC complex;GO:0070578,RISC-loading complex	GO:0003676,nucleic acid binding;GO:0001046,core promoter sequence-specific DNA binding;GO:0003725,double-stranded RNA binding;GO:0035198,miRNA binding;GO:0003723,RNA binding;GO:0000978,RNA polymerase II cis-regulatory region sequence-specific DNA binding;GO:0000993,RNA polymerase II complex binding;GO:0003727,single-stranded RNA binding;GO:0000976,transcription regulatory region sequence-specific…	GO:0031047,gene silencing by RNA;GO:0035280,miRNA loading onto RISC involved in gene silencing by miRNA;GO:0035278,miRNA mediated inhibition of translation;GO:0010586,miRNA metabolic process;GO:0016525,negative regulation of angiogenesis;GO:0000956,nuclear-transcribed mRNA catabolic process;GO:0010628,positive regulation of gene expression;GO:1901224,positive regulation of NIK/NF-kappaB signaling…
G3XA26_MOUSE	G3XA26	Car7	Carbonic anhydrase	0	0	0	0	0	0	202.8	191.4	183	123.051	217.902	192.4			192.4	1.77082	0.027684	1	1.56357	0.023531	1	0.882967	0.305845	0		GO:0004089,carbonate dehydratase activity;GO:0008270,zinc ion binding
CCG8_MOUSE	Q8VHW2	Cacng8	Voltage-dependent calcium channel gamma-8 subunit	1079.8	910	1223.2	1185.9	965.4	1127.1	967.9	1130	951.4	1071	1092.8	1016.43	1071	1092.8	1016.43	1.02035	0.855134	0	0.949051	0.636808	0	0.930118	0.430292	0	GO:0016021,integral component of membrane;GO:0032281,AMPA glutamate receptor complex;GO:0032590,dendrite membrane;GO:0098978,glutamatergic synapse;GO:0099061,integral component of postsynaptic density membrane;GO:1990454,L-type voltage-gated calcium channel complex;GO:0014069,postsynaptic density;GO:0098839,postsynaptic density membrane;GO:0045211,postsynaptic membrane;GO:0098685,Schaffer collate…	GO:0005262,calcium channel activity;GO:0005244,voltage-gated ion channel activity;GO:0005246,calcium channel regulator activity;GO:0035255,ionotropic glutamate receptor binding;GO:0030346,protein phosphatase 2B binding;GO:0005245,voltage-gated calcium channel activity	GO:0034765,regulation of ion transmembrane transport;GO:0099590,neurotransmitter receptor internalization;GO:0098943,neurotransmitter receptor transport;GO:2000969,positive regulation of AMPA receptor activity;GO:0098970,postsynaptic neurotransmitter receptor diffusion trapping;GO:2000311,regulation of AMPA receptor activity;GO:0099072,regulation of postsynaptic membrane neurotransmitter receptor…
SLIK5_MOUSE	Q810B7	Slitrk5	SLIT and NTRK-like protein 5	0	0	0	0	457	494.8	451.4	418	409.8	190.657	360.959	426.4		475.9	426.4	1.89324	0.23253	0	2.23648	0.003725	1	1.1813	0.603257	0	GO:0016021,integral component of membrane;GO:0043235,receptor complex;GO:0045202,synapse		GO:0030534,adult behavior;GO:0007409,axonogenesis;GO:0072358,cardiovascular system development;GO:0007268,chemical synaptic transmission;GO:0048813,dendrite morphogenesis;GO:0007625,grooming behavior;GO:0051965,positive regulation of synapse assembly;GO:1905606,regulation of presynapse assembly;GO:0009410,response to xenobiotic stimulus;GO:0043588,skin development;GO:0021756,striatum development
EGFR_MOUSE	Q01279	Egfr	Epidermal growth factor receptor	302.9	368.3	330.7	341.3	307.2	319.4	266.3	328.2	309.4	333.967	322.633	301.3	333.967	322.633	301.3	0.966064	0.624662	0	0.902186	0.282982	0	0.933877	0.364308	0	GO:0016020,membrane;GO:0016324,apical plasma membrane;GO:0009925,basal plasma membrane;GO:0016323,basolateral plasma membrane;GO:0030054,cell junction;GO:0009986,cell surface;GO:0005737,cytoplasm;GO:0031901,early endosome membrane;GO:0030139,endocytic vesicle;GO:0005789,endoplasmic reticulum membrane;GO:0005768,endosome;GO:0010008,endosome membrane;GO:0000139,Golgi membrane;GO:0005887,integral co…	GO:0005524,ATP binding;GO:0004714,transmembrane receptor protein tyrosine kinase activity;GO:0051015,actin filament binding;GO:0005516,calmodulin binding;GO:0003682,chromatin binding;GO:0019899,enzyme binding;GO:0048408,epidermal growth factor binding;GO:0005006,epidermal growth factor-activated receptor activity;GO:0042802,identical protein binding;GO:0005178,integrin binding;GO:0016301,kinase a…	GO:0007169,transmembrane receptor protein tyrosine kinase signaling pathway;GO:0000186,activation of MAPKK activity;GO:0048143,astrocyte activation;GO:0030154,cell differentiation;GO:0000902,cell morphogenesis;GO:0007166,cell surface receptor signaling pathway;GO:0098609,cell-cell adhesion;GO:0071230,cellular response to amino acid stimulus;GO:0071276,cellular response to cadmium ion;GO:0071549,c…	mmu:13649,path:mmu04014,Ras signaling pathway;mmu:13649,path:mmu04015,Rap1 signaling pathway;mmu:13649,path:mmu04010,MAPK signaling pathway;mmu:13649,path:mmu04012,ErbB signaling pathway;mmu:13649,path:mmu04630,Jak-STAT signaling pathway;mmu:13649,path:mmu04066,HIF-1 signaling pathway;mmu:13649,path:mmu04068,FoxO signaling pathway;mmu:13649,path:mmu04020,Calcium signaling pathway;mmu:13649,path:m…
P5CR2_MOUSE	Q922Q4	Pycr2	Pyrroline-5-carboxylate reductase 2	1135.6	924.8	1089.4	1095.3	974.9	1087.6	938.7	871.1	834.9	1049.93	1052.6	881.567	1049.93	1052.6	881.567	1.00254	0.973297	0	0.839641	0.07625	0	0.837513	0.025752	0	GO:0005739,mitochondrion	GO:0004735,pyrroline-5-carboxylate reductase activity	GO:0034599,cellular response to oxidative stress;GO:0055129,L-proline biosynthetic process;GO:0006561,proline biosynthetic process	mmu:69051,path:mmu00330,Arginine and proline metabolism
RLBP1_MOUSE	Q9Z275	Rlbp1	Retinaldehyde-binding protein 1	818.4	771.5	837.2	900.1	788.8	823.4	712.8	792.2	709.3	809.033	837.433	738.1	809.033	837.433	738.1	1.0351	0.499046	0	0.912323	0.100786	0	0.881384	0.080069	0	GO:0044297,cell body;GO:0005813,centrosome;GO:0005829,cytosol;GO:0005654,nucleoplasm	GO:0016918,retinal binding;GO:0005502,11-cis retinal binding;GO:1902936,phosphatidylinositol bisphosphate binding;GO:0019841,retinol binding	GO:0007601,visual perception;GO:0050896,response to stimulus
CRYAB_MOUSE	P23927	Cryab	Alpha-crystallin B chain	331.2	367.4	354.8	384.8	342.4	399.7	308.9	365.8	246.2	351.133	375.633	306.967	351.133	375.633	306.967	1.06977	0.291469	0	0.874217	0.288667	0	0.817198	0.149621	0	GO:0032432,actin filament bundle;GO:0030424,axon;GO:0097512,cardiac myofibril;GO:0009986,cell surface;GO:0043292,contractile fiber;GO:0005737,cytoplasm;GO:0005829,cytosol;GO:0043197,dendritic spine;GO:0005794,Golgi apparatus;GO:0031674,I band;GO:0031430,M band;GO:0015630,microtubule cytoskeleton;GO:0005739,mitochondrion;GO:0043209,myelin sheath;GO:0005634,nucleus;GO:0043204,perikaryon;GO:0005886,…	GO:0046872,metal ion binding;GO:0005212,structural constituent of eye lens;GO:0001540,amyloid-beta binding;GO:0008092,cytoskeletal protein binding;GO:0042802,identical protein binding;GO:0008017,microtubule binding;GO:0042803,protein homodimerization activity;GO:0044877,protein-containing complex binding;GO:0005198,structural molecule activity;GO:0051082,unfolded protein binding	GO:0060561,apoptotic process involved in morphogenesis;GO:0043010,camera-type eye development;GO:0071480,cellular response to gamma radiation;GO:0002088,lens development in camera-type eye;GO:0031109,microtubule polymerization or depolymerization;GO:0010259,multicellular organism aging;GO:0007517,muscle organ development;GO:1905907,negative regulation of amyloid fibril formation;GO:0043066,negati…	mmu:12955,path:mmu04141,Protein processing in endoplasmic reticulum;mmu:12955,path:mmu04213,Longevity regulating pathway - multiple species
F6THK7_MOUSE	F6THK7	Irak1	Interleukin-1 receptor-associated kinase 1 (Fragment)	102.6	122.8	135.3	151.2	125.3	97.2	102	142.6	124.2	120.233	124.567	122.933	120.233	124.567	122.933	1.03604	0.824192	0	1.02246	0.866926	0	0.986888	0.937324	0	GO:0005829,cytosol;GO:0016020,membrane;GO:0005654,nucleoplasm;GO:0005737,cytoplasm;GO:0005811,lipid droplet;GO:0005634,nucleus;GO:0005886,plasma membrane;GO:0032991,protein-containing complex	GO:0005524,ATP binding;GO:0004674,protein serine/threonine kinase activity;GO:0031072,heat shock protein binding;GO:0046982,protein heterodimerization activity;GO:0042803,protein homodimerization activity;GO:0042802,identical protein binding;GO:0005149,interleukin-1 receptor binding;GO:0016301,kinase activity;GO:0004672,protein kinase activity	GO:0070498,interleukin-1-mediated signaling pathway;GO:0007250,activation of NF-kappaB-inducing kinase activity;GO:0007568,aging;GO:0034605,cellular response to heat;GO:0071456,cellular response to hypoxia;GO:0007254,JNK cascade;GO:0031663,lipopolysaccharide-mediated signaling pathway;GO:0032088,negative regulation of NF-kappaB transcription factor activity;GO:0043123,positive regulation of I-kap…	mmu:16179,path:mmu04010,MAPK signaling pathway;mmu:16179,path:mmu04064,NF-kappa B signaling pathway;mmu:16179,path:mmu04620,Toll-like receptor signaling pathway;mmu:16179,path:mmu04722,Neurotrophin signaling pathway;mmu:16179,path:mmu05132,Salmonella infection;mmu:16179,path:mmu05135,Yersinia infection;mmu:16179,path:mmu05133,Pertussis;mmu:16179,path:mmu05152,Tuberculosis;mmu:16179,path:mmu05170,…
CHP1_MOUSE	P61022	Chp1	Calcineurin B homologous protein 1	227.4	249.6	261.8	264.7	231.9	255	198.5	233.9	203.1	246.267	250.533	211.833	246.267	250.533	211.833	1.01733	0.775764	0	0.860179	0.083294	0	0.84553	0.058783	0	GO:0005737,cytoplasm;GO:0005829,cytosol;GO:0005783,endoplasmic reticulum;GO:0005793,endoplasmic reticulum-Golgi intermediate compartment;GO:0000139,Golgi membrane;GO:0015630,microtubule cytoskeleton;GO:0005634,nucleus;GO:0005886,plasma membrane;GO:0030133,transport vesicle	GO:0005509,calcium ion binding;GO:0048306,calcium-dependent protein binding;GO:0019900,kinase binding;GO:0008017,microtubule binding;GO:0004860,protein kinase inhibitor activity	GO:0017156,calcium-ion regulated exocytosis;GO:0071468,cellular response to acidic pH;GO:0031122,cytoplasmic microtubule organization;GO:0022406,membrane docking;GO:0061025,membrane fusion;GO:0061024,membrane organization;GO:0001578,microtubule bundle formation;GO:0070885,negative regulation of calcineurin-NFAT signaling cascade;GO:0032088,negative regulation of NF-kappaB transcription factor act…
TM160_MOUSE	Q9D938	Tmem160	Transmembrane protein 160	0	0	0	0	517.8	537	456.7	555	536.6	174.754	442.74	516.1		527.4	516.1	2.5335	0.044985	1	2.95329	0.002173	1	1.1657	0.460972	0	GO:0016021,integral component of membrane;GO:0005739,mitochondrion
KAP1_MOUSE	P12849	Prkar1b	cAMP-dependent protein kinase type I-beta regulatory subunit	283.9	494	324.2	622.5	499.6	545	487.9	570.6	493.2	367.367	555.7	517.233	367.367	555.7	517.233	1.51266	0.062943	0	1.40795	0.097978	0	0.930778	0.438386	0	GO:0005952,cAMP-dependent protein kinase complex;GO:0005737,cytoplasm;GO:0005829,cytosol;GO:0098978,glutamatergic synapse;GO:0098686,hippocampal mossy fiber to CA3 synapse;GO:0005771,multivesicular body;GO:0005886,plasma membrane;GO:0098685,Schaffer collateral - CA1 synapse;GO:0045202,synapse	GO:0030552,cAMP binding;GO:0008603,cAMP-dependent protein kinase regulator activity;GO:0004862,cAMP-dependent protein kinase inhibitor activity;GO:0034236,protein kinase A catalytic subunit binding	GO:0009887,animal organ morphogenesis;GO:0007611,learning or memory;GO:0050804,modulation of chemical synaptic transmission;GO:2000480,negative regulation of cAMP-dependent protein kinase activity;GO:0006468,protein phosphorylation;GO:0043949,regulation of cAMP-mediated signaling;GO:0010738,regulation of protein kinase A signaling;GO:0045859,regulation of protein kinase activity;GO:0098693,regula…	mmu:19085,path:mmu04910,Insulin signaling pathway
Q6NXL1_MOUSE	Q6NXL1	Sec24d	Sec24-related gene family, member D (S. cerevisiae)	200.5	225.5	234.3	214.5	207.6	196.2	177.3	219.1	176.7	220.1	206.1	191.033	220.1	206.1	191.033	0.936393	0.288334	0	0.867939	0.168317	0	0.926896	0.372411	0	GO:0030127,COPII vesicle coat;GO:0000139,Golgi membrane;GO:0043231,intracellular membrane-bounded organelle	GO:0000149,SNARE binding;GO:0008270,zinc ion binding	GO:0090110,COPII-coated vesicle cargo loading;GO:0006888,endoplasmic reticulum to Golgi vesicle-mediated transport;GO:0001701,in utero embryonic development;GO:0006886,intracellular protein transport	mmu:69608,path:mmu04141,Protein processing in endoplasmic reticulum
A0A3B2WC92_MOUSE	A0A3B2WC92	Spast	Spastin	0	0	0	0	327.9	312.3	273.4	322.9	290.9	164.41	251.737	295.733		320.1	295.733	1.53115	0.310018	0	1.79875	0.018441	1	1.17477	0.563913	0	GO:1904115,axon cytoplasm;GO:0005813,centrosome;GO:0005737,cytoplasm;GO:0031410,cytoplasmic vesicle;GO:0005829,cytosol;GO:0005789,endoplasmic reticulum membrane;GO:0071782,endoplasmic reticulum tubular network;GO:0005768,endosome;GO:0016021,integral component of membrane;GO:0005811,lipid droplet;GO:0005874,microtubule;GO:0015630,microtubule cytoskeleton;GO:0030496,midbody;GO:0031965,nuclear membr…	GO:0043014,alpha-tubulin binding;GO:0005524,ATP binding;GO:0016887,ATPase activity;GO:0048487,beta-tubulin binding;GO:0016853,isomerase activity;GO:0008017,microtubule binding;GO:0008568,microtubule-severing ATPase activity	GO:0008089,anterograde axonal transport;GO:0019896,axonal transport of mitochondrion;GO:0007409,axonogenesis;GO:0032506,cytokinetic process;GO:0031122,cytoplasmic microtubule organization;GO:0006888,endoplasmic reticulum to Golgi vesicle-mediated transport;GO:0010458,exit from mitosis;GO:0090148,membrane fission;GO:0008152,metabolic process;GO:0001578,microtubule bundle formation;GO:0051013,micro…
NDEL1_MOUSE	Q9ERR1	Ndel1	Nuclear distribution protein nudE-like 1	116.1	127.9	124.2	125.1	653.2	712.2	601.4	712.2	652.1	122.733	496.833	655.233	122.733	496.833	655.233	4.04807	0.115589	0	5.33868	7.8e-05	1	1.31882	0.449962	0	GO:0030424,axon;GO:1904115,axon cytoplasm;GO:0043203,axon hillock;GO:0044297,cell body;GO:0031252,cell leading edge;GO:0090724,central region of growth cone;GO:0005813,centrosome;GO:0000777,condensed chromosome kinetochore;GO:0005737,cytoplasm;GO:0005829,cytosol;GO:0005871,kinesin complex;GO:0000776,kinetochore;GO:0005874,microtubule;GO:0005875,microtubule associated complex;GO:0005815,microtubul…	GO:0043014,alpha-tubulin binding;GO:0048487,beta-tubulin binding;GO:0042802,identical protein binding;GO:0008017,microtubule binding;GO:0070012,oligopeptidase activity;GO:0044877,protein-containing complex binding	GO:0090630,activation of GTPase activity;GO:0016477,cell migration;GO:0021955,central nervous system neuron axonogenesis;GO:0051642,centrosome localization;GO:0021799,cerebral cortex radially oriented cell migration;GO:0007059,chromosome segregation;GO:0051303,establishment of chromosome localization;GO:0000132,establishment of mitotic spindle orientation;GO:0001833,inner cell mass cell prolifera…
NUFP2_MOUSE	Q5F2E7	Nufip2	Nuclear fragile X mental retardation-interacting protein 2	140.7	171.1	125.5	116.3	131.5	134.6	117	115.9	134	145.767	127.467	122.3	145.767	127.467	122.3	0.874457	0.276878	0	0.839012	0.183965	0	0.959467	0.560205	0	GO:0005737,cytoplasm;GO:0010494,cytoplasmic stress granule;GO:0005829,cytosol;GO:0016604,nuclear body;GO:0005654,nucleoplasm;GO:0005634,nucleus;GO:0042788,polysomal ribosome	GO:0003723,RNA binding
A0A1D5RLV3_MOUSE	A0A1D5RLV3	Unc80	Protein unc-80 homolog	0	0	0	0	0	0	0	0	201.7	224.83	235.833	190.065			201.7	1.04894	0.766076	0	0.845373	0.280663	0	0.805931	0.133224	0	GO:0030424,axon;GO:0034703,cation channel complex	GO:0005261,cation channel activity	GO:0055080,cation homeostasis
TM38A_MOUSE	Q3TMP8	Tmem38a	Trimeric intracellular cation channel type A	0	0	0	0	671	633.7	597.9	581.6	620.1	178.674	484.629	599.867		652.35	599.867	2.71236	0.145504	0	3.35732	7.4e-05	1	1.23779	0.531453	0	GO:0016021,integral component of membrane;GO:0031965,nuclear membrane;GO:0016529,sarcoplasmic reticulum;GO:0033017,sarcoplasmic reticulum membrane;GO:0016020,membrane	GO:0015269,calcium-activated potassium channel activity;GO:0042802,identical protein binding;GO:0005267,potassium channel activity;GO:0005261,cation channel activity	GO:0071313,cellular response to caffeine;GO:0007029,endoplasmic reticulum organization;GO:0015672,monovalent inorganic cation transport;GO:0071805,potassium ion transmembrane transport;GO:0010881,regulation of cardiac muscle contraction by regulation of the release of sequestered calcium ion;GO:0014808,release of sequestered calcium ion into cytosol by sarcoplasmic reticulum
E9Q794_MOUSE	E9Q794	Mta3	Metastasis-associated protein MTA3	0	0	0	0	391.9	414.4	370.1	433.6	400.4	266.583	347.886	401.367		403.15	401.367	1.30498	0.255342	0	1.5056	0.012953	1	1.15373	0.412975	0	GO:0005634,nucleus;GO:0005737,cytoplasm;GO:0043231,intracellular membrane-bounded organelle;GO:0005654,nucleoplasm;GO:0016581,NuRD complex	GO:0003677,DNA binding;GO:0003682,chromatin binding;GO:0043565,sequence-specific DNA binding;GO:0008270,zinc ion binding;GO:0042826,histone deacetylase binding;GO:0044877,protein-containing complex binding;GO:0001103,RNA polymerase II repressing transcription factor binding;GO:0003713,transcription coactivator activity;GO:0003714,transcription corepressor activity	GO:0006355,regulation of transcription;GO:0016575,histone deacetylation;GO:0000122,negative regulation of transcription by RNA polymerase II;GO:0045892,negative regulation of transcription;GO:0008284,positive regulation of cell population proliferation;GO:0010971,positive regulation of G2/M transition of mitotic cell cycle
TTC9A_MOUSE	Q3V038	Ttc9	Tetratricopeptide repeat protein 9A	0	0	0	0	459	538.7	436.2	499.4	410.4	132.617	389.728	448.667		498.85	448.667	2.93874	0.083639	0	3.38317	0.000403	1	1.15123	0.634186	0			GO:0060348,bone development
CMTD1_MOUSE	Q8BIG7	Comtd1	Catechol O-methyltransferase domain-containing protein 1	152.9	115	161.9	145.7	123.4	134.5	118.3	132.9	119.1	143.267	134.533	123.433	143.267	134.533	123.433	0.939041	0.608696	0	0.861564	0.260134	0	0.917493	0.237278	0	GO:0016021,integral component of membrane;GO:0005739,mitochondrion	GO:0008171,O-methyltransferase activity;GO:0008757,S-adenosylmethionine-dependent methyltransferase activity	GO:0032259,methylation
E9Q4Z6_MOUSE	E9Q4Z6	Dzank1	Double zinc ribbon and ankyrin repeat-containing protein 1	207.9	231.8	242.4	225.8	211.9	223.8	190.1	222.3	192.4	227.367	220.5	201.6	227.367	220.5	201.6	0.969799	0.569228	0	0.886674	0.151252	0	0.914286	0.168024	0		GO:0046872,metal ion binding
SYT13_MOUSE	Q9EQT6	Syt13	Synaptotagmin-13	0	0	0	0	0	0	0	0	479.9	188.382	139.75	298.591			479.9	0.741843	0.226973	0	1.58503	0.320003	0	2.13661	0.156026	0	GO:0030424,axon;GO:0030659,cytoplasmic vesicle membrane;GO:0070382,exocytic vesicle;GO:0005887,integral component of plasma membrane;GO:0043231,intracellular membrane-bounded organelle;GO:0043005,neuron projection;GO:0005886,plasma membrane;GO:0045202,synapse;GO:0030133,transport vesicle	GO:0005509,calcium ion binding;GO:0005544,calcium-dependent phospholipid binding;GO:0030276,clathrin binding;GO:0001786,phosphatidylserine binding;GO:0000149,SNARE binding	GO:0017156,calcium-ion regulated exocytosis;GO:0071277,cellular response to calcium ion;GO:0017158,regulation of calcium ion-dependent exocytosis;GO:0014059,regulation of dopamine secretion;GO:0006906,vesicle fusion;GO:0016192,vesicle-mediated transport
LXN_MOUSE	P70202	Lxn	Latexin	0	0	0	0	0	0	3776.8	4157.5	3876.9	160.985	357.93	3937.07			3937.07	2.22338	0.064996	0	24.4562	5e-06	1	10.9995	1.3e-05	1	GO:0005737,cytoplasm;GO:0005615,extracellular space	GO:0008201,heparin binding;GO:0008191,metalloendopeptidase inhibitor activity	GO:0050965,detection of temperature stimulus involved in sensory perception of pain;GO:0006954,inflammatory response
H3BJG4_MOUSE	H3BJG4	Trip11	Thyroid hormone receptor interactor 11 (Fragment)	0	0	0	0	0	0	0	0	182.4	165.843	153.195	193.807			182.4	0.923733	0.819019	0	1.16862	0.391498	0	1.2651	0.417245	0	GO:0002080,acrosomal membrane;GO:0005801,cis-Golgi network;GO:0005793,endoplasmic reticulum-Golgi intermediate compartment;GO:0005794,Golgi apparatus;GO:0002079,inner acrosomal membrane;GO:0016607,nuclear speck;GO:0005654,nucleoplasm;GO:0002081,outer acrosomal membrane		GO:0060348,bone development;GO:0051216,cartilage development;GO:0003413,chondrocyte differentiation involved in endochondral bone morphogenesis;GO:0007030,Golgi organization;GO:0090161,Golgi ribbon formation;GO:0060122,inner ear receptor cell stereocilium organization;GO:0006486,protein glycosylation;GO:0003281,ventricular septum development;GO:0099041,vesicle tethering to Golgi
F6R860_MOUSE	F6R860	Wdsub1	WD repeat, SAM and U-box domain-containing protein 1 (Fragment)	0	0	0	0	0	0	49.9	54.1	53.7	167.154	197.545	52.5667			52.5667	1.18182	0.114632	0	0.314481	0.001043	-1	0.2661	3.5e-05	-1		GO:0004842,ubiquitin-protein transferase activity
ENPP5_MOUSE	Q9EQG7	Enpp5	Ectonucleotide pyrophosphatase/phosphodiesterase family member 5	320.1	359.8	323.7	350	357.3	353.1	320.1	377.5	335.7	334.533	353.467	344.433	334.533	353.467	344.433	1.0566	0.214677	0	1.02959	0.666466	0	0.974444	0.628484	0	GO:0005576,extracellular region;GO:0005887,integral component of plasma membrane;GO:0016020,membrane;GO:0005886,plasma membrane	GO:0046872,metal ion binding;GO:0004551,nucleotide diphosphatase activity	GO:0007154,cell communication;GO:0009166,nucleotide catabolic process
A0A2R8W6X5_MOUSE	A0A2R8W6X5	Nubp1	Cytosolic Fe-S cluster assembly factor NUBP1	33.8	30	41.2	36.6	33.6	40.2	35.9	29.1	33	35	36.8	32.6667	35	36.8	32.6667	1.05143	0.660564	0	0.933333	0.575599	0	0.887681	0.206248	0	GO:0005814,centriole;GO:0005929,cilium;GO:0005829,cytosol;GO:0005634,nucleus;GO:0005886,plasma membrane	GO:0051539,4 iron;GO:0005524,ATP binding;GO:0051536,iron-sulfur cluster binding;GO:0046872,metal ion binding	GO:0030030,cell projection organization;GO:0006879,cellular iron ion homeostasis;GO:0051642,centrosome localization;GO:0016226,iron-sulfur cluster assembly;GO:0010826,negative regulation of centrosome duplication;GO:0072697,protein localization to cell cortex;GO:0001558,regulation of cell growth
PCYXL_MOUSE	Q8C7K6	Pcyox1l	Prenylcysteine oxidase-like	0	0	0	0	581.4	596.8	547.2	559.3	523.1	183.714	469.47	543.2		589.1	543.2	2.55543	0.076747	0	2.95676	3.4e-05	1	1.15705	0.572732	0	GO:0005576,extracellular region	GO:0001735,prenylcysteine oxidase activity	GO:0030327,prenylated protein catabolic process;GO:0030328,prenylcysteine catabolic process
A0A1B0GT25_MOUSE	A0A1B0GT25	Abcc8	ATP-binding cassette, sub-family C (CFTR/MRP), member 8 (Fragment)	0	0	0	0	271.1	252.4	251.8	275.1	264.2	179.693	229.161	263.7		261.75	263.7	1.27529	0.250702	0	1.46751	0.008973	1	1.15072	0.363496	0	GO:0008282,inward rectifying potassium channel;GO:0016020,membrane;GO:0005886,plasma membrane;GO:0042383,sarcolemma;GO:0030672,synaptic vesicle membrane;GO:0005739,mitochondrion	GO:0005524,ATP binding;GO:0016887,ATPase activity;GO:0042626,ATPase-coupled transmembrane transporter activity;GO:0044325,ion channel binding;GO:0005267,potassium channel activity;GO:0008281,sulfonylurea receptor activity	GO:0001678,cellular glucose homeostasis;GO:0071310,cellular response to organic substance;GO:0007613,memory;GO:0016525,negative regulation of angiogenesis;GO:1905604,negative regulation of blood-brain barrier permeability;GO:0060253,negative regulation of glial cell proliferation;GO:0046676,negative regulation of insulin secretion;GO:0010989,negative regulation of low-density lipoprotein particle…
A0A0J9YUM2_MOUSE	A0A0J9YUM2	Syngap1	Ras/Rap GTPase-activating protein SynGAP	0	0	0	0	1202.6	1191.9	1077.2	1331.2	1204.9	137.65	858.476	1204.43		1197.25	1204.43	6.23667	0.10067	0	8.74999	0.000139	1	1.40299	0.374737	0	GO:0043198,dendritic shaft;GO:0098978,glutamatergic synapse;GO:0016020,membrane;GO:0005886,plasma membrane;GO:0014069,postsynaptic density;GO:0099092,postsynaptic density;GO:0045202,synapse	GO:0005096,GTPase activator activity;GO:0019901,protein kinase binding;GO:0017124,SH3 domain binding	GO:0016358,dendrite development;GO:0098880,maintenance of postsynaptic specialization structure;GO:0050771,negative regulation of axonogenesis;GO:0043524,negative regulation of neuron apoptotic process;GO:0046580,negative regulation of Ras protein signal transduction;GO:0007389,pattern specification process;GO:0007265,Ras protein signal transduction;GO:0043113,receptor clustering;GO:0048169,regul…	mmu:240057,path:mmu04014,Ras signaling pathway
MBP_MOUSE	P04370	Mbp	Myelin basic protein	64.2	61.2	66.7	138.4	70.3	80.8	52.4	58.1	56.7	64.0333	96.5	55.7333	64.0333	96.5	55.7333	1.50703	0.20089	0	0.87038	0.023816	0	0.577547	0.127336	0	GO:0071944,cell periphery;GO:0042995,cell projection;GO:0043218,compact myelin;GO:0005737,cytoplasm;GO:0033269,internode region of axon;GO:0043209,myelin sheath;GO:0043025,neuronal cell body;GO:0005634,nucleus;GO:0005886,plasma membrane;GO:0032991,protein-containing complex	GO:0019911,structural constituent of myelin sheath;GO:0005516,calmodulin binding;GO:0002020,protease binding	GO:0035633,maintenance of blood-brain barrier;GO:0000165,MAPK cascade;GO:0061024,membrane organization;GO:0042552,myelination;GO:0034115,negative regulation of heterotypic cell-cell adhesion;GO:1904209,positive regulation of chemokine (C-C motif) ligand 2 secretion;GO:2000778,positive regulation of interleukin-6 secretion;GO:1904685,positive regulation of metalloendopeptidase activity;GO:0009636,…
DDX20_MOUSE	Q9JJY4	Ddx20	Probable ATP-dependent RNA helicase DDX20	136.5	127.1	155.6	137.6	129.6	115.4	123.4	157.1	132.6	139.733	127.533	137.7	139.733	127.533	137.7	0.912691	0.314024	0	0.985448	0.884113	0	1.07972	0.443534	0	GO:0005737,cytoplasm;GO:0005829,cytosol;GO:0097504,Gemini of coiled bodies;GO:0090571,RNA polymerase II transcription repressor complex;GO:0032797,SMN complex;GO:0034719,SMN-Sm protein complex;GO:0017053,transcription repressor complex	GO:0005524,ATP binding;GO:0003677,DNA binding;GO:0042826,histone deacetylase binding;GO:0019904,protein domain specific binding;GO:0030674,protein-macromolecule adaptor activity;GO:0070491,repressing transcription factor binding;GO:0003723,RNA binding;GO:0003724,RNA helicase activity	GO:0008285,negative regulation of cell population proliferation;GO:0000122,negative regulation of transcription by RNA polymerase II;GO:0045892,negative regulation of transcription;GO:0048477,oogenesis;GO:0043065,positive regulation of apoptotic process;GO:0050810,regulation of steroid biosynthetic process;GO:0000387,spliceosomal snRNP assembly	mmu:53975,path:mmu03013,RNA transport
SGSM1_MOUSE	Q8BPQ7	Sgsm1	Small G protein signaling modulator 1	0	0	0	0	157.6	167.5	137.2	153.7	144.2	226.697	162.278	145.033		162.55	145.033	0.715834	0.188698	0	0.639767	0.11647	0	0.893736	0.036501	0	GO:0030659,cytoplasmic vesicle membrane;GO:0005829,cytosol;GO:0005737,cytoplasm;GO:0005794,Golgi apparatus	GO:0005096,GTPase activator activity;GO:0017137,Rab GTPase binding	GO:0090630,activation of GTPase activity;GO:0006886,intracellular protein transport;GO:0045944,positive regulation of transcription by RNA polymerase II
D3YW09_MOUSE	D3YW09	Sf3a2	Splicing factor 3A subunit 2	1039.9	1010.4	1349.5	1218.5	1165.6	1312.9	978.3	1318	1001.1	1133.27	1232.33	1099.13	1133.27	1232.33	1099.13	1.08742	0.443736	0	0.969881	0.835665	0	0.891912	0.321343	0	GO:0071013,catalytic step 2 spliceosome;GO:0016607,nuclear speck;GO:0005686,U2 snRNP;GO:0071005,U2-type precatalytic spliceosome;GO:0005634,nucleus;GO:0071004,U2-type prespliceosome	GO:0003676,nucleic acid binding;GO:0008270,zinc ion binding	GO:0010976,positive regulation of neuron projection development;GO:1903241,U2-type prespliceosome assembly;GO:0000398,mRNA splicing;GO:0000375,RNA splicing;GO:0000245,spliceosomal complex assembly	mmu:20222,path:mmu03040,Spliceosome
MK14_MOUSE	P47811	Mapk14	Mitogen-activated protein kinase 14	533.7	566.5	660.1	689.3	547.4	602.6	502.5	653.2	538.4	586.767	613.1	564.7	586.767	613.1	564.7	1.04488	0.662856	0	0.962393	0.728061	0	0.921057	0.474683	0	GO:0005623,cell;GO:0005737,cytoplasm;GO:0005829,cytosol;GO:0098978,glutamatergic synapse;GO:0005739,mitochondrion;GO:0016607,nuclear speck;GO:0005654,nucleoplasm;GO:0005634,nucleus;GO:0000922,spindle pole	GO:0005524,ATP binding;GO:0004707,MAP kinase activity;GO:0019899,enzyme binding;GO:0016301,kinase activity;GO:0048273,mitogen-activated protein kinase p38 binding;GO:0051525,NFAT protein binding;GO:0008022,protein C-terminus binding;GO:0004672,protein kinase activity;GO:0019903,protein phosphatase binding;GO:0004674,protein serine/threonine kinase activity	GO:0001525,angiogenesis;GO:0006915,apoptotic process;GO:0001502,cartilage condensation;GO:0000902,cell morphogenesis;GO:0006974,cellular response to DNA damage stimulus;GO:0071479,cellular response to ionizing radiation;GO:0071222,cellular response to lipopolysaccharide;GO:0071223,cellular response to lipoteichoic acid;GO:0071356,cellular response to tumor necrosis factor;GO:0035924,cellular resp…	mmu:26416,path:mmu04015,Rap1 signaling pathway;mmu:26416,path:mmu04010,MAPK signaling pathway;mmu:26416,path:mmu04370,VEGF signaling pathway;mmu:26416,path:mmu04668,TNF signaling pathway;mmu:26416,path:mmu04068,FoxO signaling pathway;mmu:26416,path:mmu04071,Sphingolipid signaling pathway;mmu:26416,path:mmu04114,Oocyte meiosis;mmu:26416,path:mmu04218,Cellular senescence;mmu:26416,path:mmu04550,Sig…
MSI2H_MOUSE	Q920Q6	Msi2	RNA-binding protein Musashi homolog 2	0	345.2	0	364.4	362.1	321.8	308.6	366.6	360.2	266.526	349.433	345.133	345.2	349.433	345.133	1.31106	0.120017	0	1.29493	0.146861	0	0.987694	0.86072	0	GO:0005737,cytoplasm;GO:0005634,nucleus;GO:0005844,polysome;GO:1990904,ribonucleoprotein complex	GO:0003723,RNA binding;GO:0042802,identical protein binding;GO:0008266,poly(U) RNA binding;GO:0003727,single-stranded RNA binding	GO:0051252,regulation of RNA metabolic process;GO:0048864,stem cell development	mmu:76626,path:mmu03015,mRNA surveillance pathway
ACADS_MOUSE	Q07417	Acads	Short-chain specific acyl-CoA dehydrogenase, mitochondrial	323.8	344.9	370.2	349.6	333.1	333.6	305.8	336.7	311.6	346.3	338.767	318.033	346.3	338.767	318.033	0.978246	0.630031	0	0.918375	0.160393	0	0.938798	0.130476	0	GO:0005813,centrosome;GO:0005759,mitochondrial matrix;GO:0031966,mitochondrial membrane;GO:0005739,mitochondrion;GO:0005654,nucleoplasm	GO:0003995,acyl-CoA dehydrogenase activity;GO:0004085,butyryl-CoA dehydrogenase activity;GO:0000062,fatty-acyl-CoA binding;GO:0050660,flavin adenine dinucleotide binding;GO:0042802,identical protein binding	GO:0046359,butyrate catabolic process;GO:0033539,fatty acid beta-oxidation using acyl-CoA dehydrogenase	mmu:11409,path:mmu00640,Propanoate metabolism;mmu:11409,path:mmu00650,Butanoate metabolism;mmu:11409,path:mmu00071,Fatty acid degradation;mmu:11409,path:mmu00280,Valine, leucine and isoleucine degradation;mmu:11409,path:mmu00410,beta-Alanine metabolism
CTIF_MOUSE	Q6PEE2	Ctif	CBP80/20-dependent translation initiation factor	0	300.8	0	367.9	327.3	335.5	276.9	312.9	307.9	172.542	343.567	299.233	300.8	343.567	299.233	1.9912	0.059091	0	1.73426	0.123884	0	0.870961	0.057131	0	GO:0005829,cytosol;GO:0048471,perinuclear region of cytoplasm	GO:0003723,RNA binding;GO:0008494,translation activator activity	GO:0000184,nuclear-transcribed mRNA catabolic process;GO:0006446,regulation of translational initiation
E9PVP4_MOUSE	E9PVP4	Evl	Ena/VASP-like protein	0	0	0	0	172.3	211	171.9	178.3	152.6	275.838	188.146	167.6		191.65	167.6	0.682089	0.201051	0	0.607603	0.128812	0	0.890798	0.216845	0	GO:0042995,cell projection;GO:0005737,cytoplasm;GO:0005856,cytoskeleton;GO:0005925,focal adhesion;GO:0030027,lamellipodium;GO:0045335,phagocytic vesicle	GO:0003779,actin binding;GO:0017124,SH3 domain binding;GO:0005522,profilin binding	GO:0045010,actin nucleation;GO:0008154,actin polymerization or depolymerization;GO:0051289,protein homotetramerization;GO:0030048,actin filament-based movement;GO:0007411,axon guidance;GO:0051016,barbed-end actin filament capping;GO:0071346,cellular response to interferon-gamma;GO:0010633,negative regulation of epithelial cell migration;GO:1900028,negative regulation of ruffle assembly;GO:0030168…	mmu:14026,path:mmu04015,Rap1 signaling pathway
KCNA2_MOUSE	P63141	Kcna2	Potassium voltage-gated channel subfamily A member 2	0	0	0	0	672.2	742.1	689.8	682.9	639.5	303.291	522.667	670.733		707.15	670.733	1.72332	0.340877	0	2.21152	0.011938	1	1.28329	0.471126	0	GO:0030424,axon;GO:0043679,axon terminus;GO:0044305,calyx of Held;GO:0030425,dendrite;GO:0005789,endoplasmic reticulum membrane;GO:0016021,integral component of membrane;GO:0005887,integral component of plasma membrane;GO:0099056,integral component of presynaptic membrane;GO:0044224,juxtaparanode region of axon;GO:0030027,lamellipodium;GO:0031258,lamellipodium membrane;GO:0032809,neuronal cell bo…	GO:0005251,delayed rectifier potassium channel activity;GO:0019894,kinesin binding;GO:0015271,outward rectifier potassium channel activity;GO:0005249,voltage-gated potassium channel activity	GO:0019228,neuronal action potential;GO:0021633,optic nerve structural organization;GO:0097623,potassium ion export across plasma membrane;GO:0071805,potassium ion transmembrane transport;GO:0051260,protein homooligomerization;GO:0045188,regulation of circadian sleep/wake cycle;GO:0014059,regulation of dopamine secretion;GO:0034765,regulation of ion transmembrane transport;GO:0019233,sensory perc…
E9PXP7_MOUSE	E9PXP7	Ston2	Stonin-2	265.3	270.5	293.7	283	251.7	284.9	225.5	283.9	234.9	276.5	273.2	248.1	276.5	273.2	248.1	0.988065	0.823496	0	0.897288	0.230537	0	0.908126	0.299257	0	GO:0030136,clathrin-coated vesicle;GO:0031410,cytoplasmic vesicle;GO:0005829,cytosol;GO:0043231,intracellular membrane-bounded organelle;GO:0016020,membrane;GO:0043005,neuron projection;GO:0005730,nucleolus;GO:0098793,presynapse;GO:0008021,synaptic vesicle;GO:0005737,cytoplasm	GO:0035615,clathrin adaptor activity	GO:0007268,chemical synaptic transmission;GO:0002244,hematopoietic progenitor cell differentiation;GO:0030100,regulation of endocytosis;GO:0048488,synaptic vesicle endocytosis;GO:0016192,vesicle-mediated transport;GO:0006897,endocytosis;GO:0036465,synaptic vesicle recycling
A0A1Y7VMH7_MOUSE	A0A1Y7VMH7	Kidins220	Kinase D-interacting substrate 220	402	417.6	402.1	469.7	393	406.9	558	649.6	509.1	407.233	423.2	572.233	407.233	423.2	572.233	1.03921	0.544759	0	1.40517	0.016462	1	1.35216	0.034839	1	GO:0016021,integral component of membrane;GO:0005770,late endosome;GO:0032991,protein-containing complex	GO:0030165,PDZ domain binding;GO:0019901,protein kinase binding;GO:0019887,protein kinase regulator activity	GO:1990090,cellular response to nerve growth factor stimulus;GO:0048813,dendrite morphogenesis;GO:0001701,in utero embryonic development;GO:0038180,nerve growth factor signaling pathway;GO:0010976,positive regulation of neuron projection development	mmu:77480,path:mmu04722,Neurotrophin signaling pathway
CO4A2_MOUSE	P08122	Col4a2	Collagen alpha-2(IV) chain	0	0	0	0	904.6	867.5	775.4	849.3	785	230.154	627.508	803.233		886.05	803.233	2.72647	0.210941	0	3.48998	0.001202	1	1.28004	0.535891	0	GO:0005604,basement membrane;GO:0005587,collagen type IV trimer;GO:0062023,collagen-containing extracellular matrix;GO:0031012,extracellular matrix;GO:0005576,extracellular region;GO:0005615,extracellular space	GO:0005201,extracellular matrix structural constituent	GO:0007568,aging;GO:0001525,angiogenesis;GO:0071560,cellular response to transforming growth factor beta stimulus;GO:0038063,collagen-activated tyrosine kinase receptor signaling pathway;GO:0035987,endodermal cell differentiation;GO:0030198,extracellular matrix organization;GO:0016525,negative regulation of angiogenesis;GO:0014823,response to activity;GO:0006351,transcription	mmu:12827,path:mmu04151,PI3K-Akt signaling pathway;mmu:12827,path:mmu04512,ECM-receptor interaction;mmu:12827,path:mmu04510,Focal adhesion;mmu:12827,path:mmu04926,Relaxin signaling pathway;mmu:12827,path:mmu04974,Protein digestion and absorption;mmu:12827,path:mmu05200,Pathways in cancer;mmu:12827,path:mmu05222,Small cell lung cancer;mmu:12827,path:mmu04933,AGE-RAGE signaling pathway in diabetic …
E9Q3X6_MOUSE	E9Q3X6	Maob	Amine oxidase	0	0	0	0	1728.5	1955.8	1704.3	1885.5	1213.8	186.204	1301.44	1601.2		1842.15	1601.2	6.98932	0.110032	0	8.59916	0.002139	1	1.23033	0.632797	0	GO:0016021,integral component of membrane;GO:0005743,mitochondrial inner membrane;GO:0005741,mitochondrial outer membrane;GO:0005739,mitochondrion	GO:0016491,oxidoreductase activity;GO:0050660,flavin adenine dinucleotide binding;GO:0042802,identical protein binding;GO:0008131,primary amine oxidase activity	GO:0014063,negative regulation of serotonin secretion;GO:0042135,neurotransmitter catabolic process;GO:0045964,positive regulation of dopamine metabolic process;GO:0010044,response to aluminum ion;GO:0051412,response to corticosterone;GO:0045471,response to ethanol;GO:0032496,response to lipopolysaccharide;GO:0010269,response to selenium ion	mmu:109731,path:mmu00260,Glycine, serine and threonine metabolism;mmu:109731,path:mmu00330,Arginine and proline metabolism;mmu:109731,path:mmu00340,Histidine metabolism;mmu:109731,path:mmu00350,Tyrosine metabolism;mmu:109731,path:mmu00360,Phenylalanine metabolism;mmu:109731,path:mmu00380,Tryptophan metabolism;mmu:109731,path:mmu00982,Drug metabolism - cytochrome P450;mmu:109731,path:mmu04728,Dopa…
IMA3_MOUSE	O35343	Kpna4	Importin subunit alpha-3	0	0	0	0	0	0	387.3	413	370.5	139.806	176.041	390.267			390.267	1.25919	0.036702	1	2.79149	0.000123	1	2.2169	6.7e-05	1	GO:0005737,cytoplasm;GO:0042025,host cell nucleus;GO:0031965,nuclear membrane;GO:0005654,nucleoplasm;GO:0005634,nucleus	GO:0061608,nuclear import signal receptor activity;GO:0008139,nuclear localization sequence binding	GO:0006606,protein import into nucleus;GO:0006607,NLS-bearing protein import into nucleus;GO:0042542,response to hydrogen peroxide	mmu:16649,path:mmu05132,Salmonella infection
ITPK1_MOUSE	Q8BYN3	Itpk1	Inositol-tetrakisphosphate 1-kinase	0	360.3	0	410.1	398.9	405.5	336.4	321.9	343.5	308.38	404.833	333.933	360.3	404.833	333.933	1.31277	0.023157	1	1.08286	0.405169	0	0.824866	0.000577	-1	GO:0016324,apical plasma membrane;GO:0005737,cytoplasm	GO:0005524,ATP binding;GO:0047325,inositol tetrakisphosphate 1-kinase activity;GO:0052726,inositol-1;GO:0052725,inositol-1;GO:0000287,magnesium ion binding;GO:0016787,hydrolase activity;GO:0000825,inositol tetrakisphosphate 6-kinase activity;GO:0016853,isomerase activity	GO:0032957,inositol trisphosphate metabolic process;GO:0052746,inositol phosphorylation;GO:0070266,necroptotic process;GO:0021915,neural tube development	mmu:217837,path:mmu00562,Inositol phosphate metabolism;mmu:217837,path:mmu04070,Phosphatidylinositol signaling system
KSR2_MOUSE	Q3UVC0	Ksr2	Kinase suppressor of Ras 2	308.6	340.1	339.4	397.4	325.1	329.2	302.8	329.2	303	329.367	350.567	311.667	329.367	350.567	311.667	1.06437	0.454861	0	0.94626	0.262724	0	0.889037	0.195148	0	GO:0005737,cytoplasm;GO:0005829,cytosol;GO:0005886,plasma membrane	GO:0005524,ATP binding;GO:0046872,metal ion binding;GO:0004672,protein kinase activity;GO:0005078,MAP-kinase scaffold activity;GO:0031434,mitogen-activated protein kinase kinase binding;GO:0004674,protein serine/threonine kinase activity	GO:0035556,intracellular signal transduction;GO:0019722,calcium-mediated signaling;GO:0120162,positive regulation of cold-induced thermogenesis;GO:0043410,positive regulation of MAPK cascade;GO:0007265,Ras protein signal transduction;GO:0007165,signal transduction	mmu:333050,path:mmu04014,Ras signaling pathway
DCAKD_MOUSE	Q8BHC4	Dcakd	Dephospho-CoA kinase domain-containing protein	0	0	0	0	331.8	561.3	1085.6	176.7	195.8	144.079	335.812	486.033		446.55	486.033	2.33075	0.216477	0	3.37338	0.318789	0	1.44734	0.669275	0	GO:0005739,mitochondrion	GO:0005524,ATP binding;GO:0004140,dephospho-CoA kinase activity	GO:0015937,coenzyme A biosynthetic process
PYRG1_MOUSE	P70698	Ctps1	CTP synthase 1	0	760.7	0	712.8	647	664.3	622.9	735.7	663.4	453.908	674.7	674	760.7	674.7	674	1.48643	0.226932	0	1.48488	0.233701	0	0.998963	0.986337	0	GO:0097268,cytoophidium;GO:0005737,cytoplasm;GO:0005829,cytosol	GO:0005524,ATP binding;GO:0003883,CTP synthase activity;GO:0042802,identical protein binding	GO:0044210,'de novo' CTP biosynthetic process;GO:0042100,B cell proliferation;GO:0006241,CTP biosynthetic process;GO:0006541,glutamine metabolic process;GO:0019856,pyrimidine nucleobase biosynthetic process;GO:0042098,T cell proliferation	mmu:51797,path:mmu00240,Pyrimidine metabolism
FNTA_MOUSE	Q61239	Fnta	Protein farnesyltransferase/geranylgeranyltransferase type-1 subunit alpha	245.6	262	270.1	252.4	242.7	263.6	230.5	225.5	220.5	259.233	252.9	225.5	259.233	252.9	225.5	0.975569	0.537476	0	0.869873	0.012202	0	0.891657	0.014928	0	GO:0005953,CAAX-protein geranylgeranyltransferase complex;GO:0005737,cytoplasm;GO:0005875,microtubule associated complex;GO:0005965,protein farnesyltransferase complex	GO:0030548,acetylcholine receptor regulator activity;GO:0043014,alpha-tubulin binding;GO:0004662,CAAX-protein geranylgeranyltransferase activity;GO:0008017,microtubule binding;GO:0004660,protein farnesyltransferase activity;GO:0004661,protein geranylgeranyltransferase activity;GO:0004663,Rab geranylgeranyltransferase activity;GO:0030971,receptor tyrosine kinase binding	GO:0043066,negative regulation of apoptotic process;GO:0051771,negative regulation of nitric-oxide synthase biosynthetic process;GO:0045213,neurotransmitter receptor metabolic process;GO:0045787,positive regulation of cell cycle;GO:0008284,positive regulation of cell population proliferation;GO:0090045,positive regulation of deacetylase activity;GO:0051770,positive regulation of nitric-oxide synt…	mmu:14272,path:mmu00900,Terpenoid backbone biosynthesis
AP1S2_MOUSE	Q9DB50	Ap1s2	AP-1 complex subunit sigma-2	287.3	357.4	292.3	331.3	289.4	273.3	275.3	330.3	282.9	312.333	298	296.167	312.333	298	296.167	0.954109	0.640729	0	0.948239	0.59949	0	0.993848	0.943692	0	GO:0030117,membrane coat;GO:0005905,clathrin-coated pit;GO:0030659,cytoplasmic vesicle membrane;GO:0005794,Golgi apparatus;GO:0043231,intracellular membrane-bounded organelle;GO:0098793,presynapse		GO:0006886,intracellular protein transport;GO:0016192,vesicle-mediated transport;GO:0060612,adipose tissue development;GO:0045444,fat cell differentiation;GO:0050885,neuromuscular process controlling balance;GO:0016182,synaptic vesicle budding from endosome;GO:0036465,synaptic vesicle recycling;GO:0008542,visual learning	mmu:108012,path:mmu04142,Lysosome;mmu:108012,path:mmu05170,Human immunodeficiency virus 1 infection
RHOF_MOUSE	Q8BYP3	Rhof	Rho-related GTP-binding protein RhoF	0	0	0	0	0	0	267.6	289.4	260.1	212.077	301.883	272.367			272.367	1.42346	0.040102	1	1.28428	0.006486	1	0.902226	0.38534	0	GO:0005737,cytoplasm;GO:0005856,cytoskeleton;GO:0005886,plasma membrane	GO:0005525,GTP binding;GO:0003924,GTPase activity	GO:0007015,actin filament organization;GO:0016477,cell migration;GO:0007264,small GTPase mediated signal transduction
RABL3_MOUSE	Q9D4V7	Rabl3	Rab-like protein 3	490.4	469	525.7	534.1	499.4	511.4	418.2	447.5	405.7	495.033	514.967	423.8	495.033	514.967	423.8	1.04027	0.362508	0	0.856104	0.026093	0	0.822966	0.00472	-1	GO:0012505,endomembrane system	GO:0005525,GTP binding;GO:0003924,GTPase activity;GO:0042803,protein homodimerization activity	GO:0030183,B cell differentiation;GO:0006886,intracellular protein transport;GO:0001779,natural killer cell differentiation;GO:0050821,protein stabilization;GO:0032482,Rab protein signal transduction;GO:1903059,regulation of protein lipidation;GO:0046578,regulation of Ras protein signal transduction;GO:0033077,T cell differentiation in thymus
SMAP2_MOUSE	Q7TN29	Smap2	Stromal membrane-associated protein 2	0	307.2	0	366.2	300.1	307.6	280.1	319.6	303	285.342	324.633	300.9	307.2	324.633	300.9	1.1377	0.182712	0	1.05452	0.412738	0	0.926892	0.375604	0	GO:0005737,cytoplasm	GO:0005096,GTPase activator activity;GO:0046872,metal ion binding		mmu:69780,path:mmu04144,Endocytosis
IPP2_MOUSE	Q9DCL8	Ppp1r2	Protein phosphatase inhibitor 2	243.7	266.9	293.1	296.6	261.8	273.2	238.1	285	255.3	267.9	277.2	259.467	267.9	277.2	259.467	1.03471	0.62451	0	0.968521	0.691794	0	0.936027	0.358404	0	GO:0005737,cytoplasm;GO:0043197,dendritic spine;GO:0030426,growth cone	GO:0004864,protein phosphatase inhibitor activity;GO:0019904,protein domain specific binding	GO:0009966,regulation of signal transduction;GO:0005977,glycogen metabolic process;GO:0032091,negative regulation of protein binding;GO:0043666,regulation of phosphoprotein phosphatase activity
G3UYG6_MOUSE	G3UYG6	Gigyf2	GRB10-interacting GYF protein 2	0	0	0	0	0	0	271	289.5	272	190.202	264.951	277.5			277.5	1.393	0.313118	0	1.45897	0.040057	1	1.04736	0.840737	0	GO:0005737,cytoplasm;GO:0010494,cytoplasmic stress granule;GO:0005829,cytosol;GO:0005783,endoplasmic reticulum;GO:0005768,endosome;GO:0005794,Golgi apparatus;GO:0016021,integral component of membrane;GO:0043204,perikaryon;GO:0032991,protein-containing complex;GO:1990635,proximal dendrite;GO:0031982,vesicle	GO:0070064,proline-rich region binding	GO:0008344,adult locomotory behavior;GO:0044267,cellular protein metabolic process;GO:0007631,feeding behavior;GO:0048873,homeostasis of number of cells within a tissue;GO:0048009,insulin-like growth factor receptor signaling pathway;GO:0031571,mitotic G1 DNA damage checkpoint;GO:0061157,mRNA destabilization;GO:0035264,multicellular organism growth;GO:0050881,musculoskeletal movement;GO:0017148,n…
TTC9B_MOUSE	Q9D6E4	Ttc9b	Tetratricopeptide repeat protein 9B	0	507.4	0	529.1	521	539.8	461.8	484.4	465.2	334.697	529.967	470.467	507.4	529.967	470.467	1.58342	0.087483	0	1.40565	0.192973	0	0.887729	0.002599	0
A0A1W2P7U1_MOUSE	A0A1W2P7U1	Cdc34	Ubiquitin-conjugating enzyme E2 R1	352.6	407.7	379.4	404.4	370.8	366.8	315.9	391.2	365.7	379.9	380.667	357.6	379.9	380.667	357.6	1.00202	0.971085	0	0.9413	0.458941	0	0.939405	0.410459	0	GO:0005829,cytosol;GO:0016607,nuclear speck	GO:0005524,ATP binding;GO:0061631,ubiquitin conjugating enzyme activity;GO:0004842,ubiquitin-protein transferase activity;GO:0016740,transferase activity	GO:0007049,cell cycle;GO:0035458,cellular response to interferon-beta;GO:0043951,negative regulation of cAMP-mediated signaling;GO:0090261,positive regulation of inclusion body assembly;GO:0043525,positive regulation of neuron apoptotic process;GO:0043161,proteasome-mediated ubiquitin-dependent protein catabolic process;GO:0070936,protein K48-linked ubiquitination;GO:0006513,protein monoubiquitin…	mmu:216150,path:mmu04120,Ubiquitin mediated proteolysis
A0A1Y7VMA0_MOUSE	A0A1Y7VMA0	Nqo2	Ribosyldihydronicotinamide dehydrogenase [quinone] (Fragment)	0	0	0	0	189.5	185.9	183.4	181.9	182.8	191.862	195.215	182.7		187.7	182.7	1.01748	0.729147	0	0.952249	0.135613	0	0.935893	0.174915	0	GO:0005829,cytosol;GO:0005654,nucleoplasm	GO:0031404,chloride ion binding;GO:0001512,dihydronicotinamide riboside quinone reductase activity;GO:0009055,electron transfer activity;GO:0071949,FAD binding;GO:1904408,melatonin binding;GO:0003955,NAD(P)H dehydrogenase (quinone) activity;GO:0016491,oxidoreductase activity;GO:0016661,oxidoreductase activity;GO:0042803,protein homodimerization activity;GO:1905594,resveratrol binding;GO:0008270,z…	GO:0007613,memory;GO:0055114,oxidation-reduction process;GO:0070374,positive regulation of ERK1 and ERK2 cascade;GO:0043525,positive regulation of neuron apoptotic process;GO:2000379,positive regulation of reactive oxygen species metabolic process;GO:1904707,positive regulation of vascular smooth muscle cell proliferation
DACT3_MOUSE	Q0PHV7	Dact3	Dapper homolog 3	69.5	64.7	63.1	60.6	61	79.6	62	53.7	56.4	65.7667	67.0667	57.3667	65.7667	67.0667	57.3667	1.01977	0.852489	0	0.872276	0.054041	0	0.855368	0.2228	0	GO:0005737,cytoplasm	GO:0070097,delta-catenin binding;GO:0042802,identical protein binding;GO:0051018,protein kinase A binding;GO:0005080,protein kinase C binding	GO:0090090,negative regulation of canonical Wnt signaling pathway;GO:0030308,negative regulation of cell growth;GO:0010719,negative regulation of epithelial to mesenchymal transition;GO:0030178,negative regulation of Wnt signaling pathway;GO:0016055,Wnt signaling pathway
A0A0G2JDE3_MOUSE	A0A0G2JDE3	Adgrl2	Adhesion G protein-coupled receptor L2	181.5	189.8	191.1	195	167.3	185.4	178	176.7	174.8	187.467	182.567	176.5	187.467	182.567	176.5	0.973862	0.601733	0	0.941501	0.025245	0	0.96677	0.499179	0	GO:0016021,integral component of membrane;GO:0016020,membrane;GO:0098978,glutamatergic synapse;GO:0005887,integral component of plasma membrane;GO:0099055,integral component of postsynaptic membrane;GO:0043005,neuron projection	GO:0004930,G protein-coupled receptor activity;GO:0030246,carbohydrate binding;GO:0030165,PDZ domain binding	GO:0007166,cell surface receptor signaling pathway;GO:0007189,adenylate cyclase-activating G protein-coupled receptor signaling pathway;GO:0007420,brain development;GO:0051965,positive regulation of synapse assembly;GO:0009617,response to bacterium;GO:0050808,synapse organization
E9Q5M4_MOUSE	E9Q5M4	Zfr2	Zinc finger RNA-binding protein 2	227.1	219.7	214.9	213	210.2	265.1	199.3	195.7	190.6	220.567	229.433	195.2	220.567	229.433	195.2	1.0402	0.651639	0	0.884993	0.004325	0	0.850792	0.130423	0	GO:0005634,nucleus	GO:0003725,double-stranded RNA binding;GO:0003727,single-stranded RNA binding;GO:0008270,zinc ion binding
AB17C_MOUSE	Q8VCV1	Abhd17c	Alpha/beta hydrolase domain-containing protein 17C	142.6	155.9	182.1	164.6	158.2	156.2	133.1	162.1	137.4	160.2	159.667	144.2	160.2	159.667	144.2	0.996671	0.966335	0	0.900125	0.337785	0	0.903132	0.174661	0	GO:0043197,dendritic spine;GO:0010008,endosome membrane;GO:0098978,glutamatergic synapse;GO:0005886,plasma membrane;GO:0014069,postsynaptic density;GO:0098839,postsynaptic density membrane;GO:0055038,recycling endosome membrane	GO:0008474,palmitoyl-(protein) hydrolase activity	GO:1902817,negative regulation of protein localization to microtubule;GO:1905668,positive regulation of protein localization to endosome;GO:0002084,protein depalmitoylation;GO:0018345,protein palmitoylation;GO:0099175,regulation of postsynapse organization
D6RFU9_MOUSE	D6RFU9	Sypl	Synaptophysin-like protein	0	0	0	0	0	0	1607.6	1791.7	1246.7	328.804	221.899	1548.67			1548.67	0.674868	0.090265	0	4.71	0.001805	1	6.97915	0.001204	1	GO:0016020,membrane;GO:0008021,synaptic vesicle
EMC7_MOUSE	Q9EP72	Emc7	ER membrane protein complex subunit 7	0	0	0	0	0	0	443	519.8	469	199.34	215.824	477.267			477.267	1.08269	0.036481	0	2.39424	0.000275	1	2.21137	0.000318	1	GO:0072546,ER membrane protein complex;GO:0016021,integral component of membrane	GO:0030246,carbohydrate binding
SAR1B_MOUSE	Q9CQC9	Sar1b	GTP-binding protein SAR1b	0	0	0	0	0	0	942.6	945.6	847	243.508	193.815	911.733			911.733	0.795931	0.474494	0	3.74417	7e-05	1	4.70414	0.000436	1	GO:0030127,COPII vesicle coat;GO:0005783,endoplasmic reticulum;GO:0070971,endoplasmic reticulum exit site;GO:0005789,endoplasmic reticulum membrane;GO:0032580,Golgi cisterna membrane	GO:0005525,GTP binding;GO:0003924,GTPase activity;GO:0046872,metal ion binding	GO:0006888,endoplasmic reticulum to Golgi vesicle-mediated transport;GO:0006886,intracellular protein transport;GO:0061024,membrane organization;GO:0070863,positive regulation of protein exit from endoplasmic reticulum;GO:0003400,regulation of COPII vesicle coating;GO:0016050,vesicle organization	mmu:66397,path:mmu04141,Protein processing in endoplasmic reticulum;mmu:66397,path:mmu05134,Legionellosis
D19L1_MOUSE	A6X919	Dpy19l1	Probable C-mannosyltransferase DPY19L1	152.5	167.5	160	163.6	164.3	148.1	155.5	173.2	162.4	160	158.667	163.7	160	158.667	163.7	0.991667	0.854823	0	1.02313	0.611677	0	1.03172	0.532742	0	GO:0016021,integral component of membrane;GO:0005637,nuclear inner membrane	GO:0000030,mannosyltransferase activity	GO:0018406,protein C-linked glycosylation via 2'-alpha-mannosyl-L-tryptophan
CAF17_MOUSE	Q8CAK1	Iba57	Putative transferase CAF17 homolog, mitochondrial	375.3	350	443	440.3	357.6	399.5	355.4	445.6	372.9	389.433	399.133	391.3	389.433	399.133	391.3	1.02491	0.804164	0	1.00479	0.964264	0	0.980374	0.840589	0	GO:0005759,mitochondrial matrix;GO:0005739,mitochondrion	GO:0016740,transferase activity	GO:0006783,heme biosynthetic process;GO:0016226,iron-sulfur cluster assembly
SHRPN_MOUSE	Q91WA6	Sharpin	Sharpin	0	0	0	0	0	0	116.8	163.2	135.4	295.377	103.937	138.467			138.467	0.351879	0.099756	0	0.468779	0.154889	0	1.33222	0.150446	0	GO:0005829,cytosol;GO:0030425,dendrite;GO:0071797,LUBAC complex;GO:0014069,postsynaptic density	GO:0042802,identical protein binding;GO:0046872,metal ion binding;GO:0031593,polyubiquitin modification-dependent protein binding;GO:0044877,protein-containing complex binding	GO:0030262,apoptotic nuclear changes;GO:0007420,brain development;GO:0008544,epidermis development;GO:0031424,keratinization;GO:0007005,mitochondrion organization;GO:0050728,negative regulation of inflammatory response;GO:0043123,positive regulation of I-kappaB kinase/NF-kappaB signaling;GO:0097039,protein linear polyubiquitination;GO:2000348,regulation of CD40 signaling pathway;GO:0010803,regula…	mmu:106025,path:mmu04217,Necroptosis;mmu:106025,path:mmu04621,NOD-like receptor signaling pathway
SPE39_MOUSE	Q8BGQ1	Vipas39	Spermatogenesis-defective protein 39 homolog	53.5	44.5	51	52.5	48.5	45.6	45.7	44.9	44.2	49.6667	48.8667	44.9333	49.6667	48.8667	44.9333	0.983893	0.822784	0	0.904698	0.156453	0	0.919509	0.127006	0	GO:0005737,cytoplasm;GO:0005769,early endosome;GO:0005794,Golgi apparatus;GO:0005770,late endosome;GO:0055037,recycling endosome	GO:0044877,protein-containing complex binding	GO:0030154,cell differentiation;GO:0030199,collagen fibril organization;GO:0032963,collagen metabolic process;GO:0008333,endosome to lysosome transport;GO:0006886,intracellular protein transport;GO:0017185,peptidyl-lysine hydroxylation;GO:0043687,post-translational protein modification;GO:0007283,spermatogenesis
MERB1_MOUSE	Q8R1Y2	Bmerb1	bMERB domain-containing protein 1	0	0	0	0	310	317.9	287.3	291.7	304.8	150.203	288.863	294.6		313.95	294.6	1.92315	0.030836	1	1.96135	0.013909	1	1.01986	0.83449	0	GO:0015630,microtubule cytoskeleton		GO:0021822,negative regulation of cell motility involved in cerebral cortex radial glia guided migration;GO:0007026,negative regulation of microtubule depolymerization
KCTD8_MOUSE	Q50H33	Kctd8	BTB/POZ domain-containing protein KCTD8	0	224	0	215.4	198.4	181.9	177.1	205.4	197.9	154.401	198.567	193.467	224	198.567	193.467	1.28605	0.290403	0	1.25302	0.338639	0	0.974316	0.711764	0	GO:0042995,cell projection;GO:0045211,postsynaptic membrane;GO:0042734,presynaptic membrane;GO:0043235,receptor complex		GO:0051260,protein homooligomerization;GO:0008277,regulation of G protein-coupled receptor signaling pathway
S20A2_MOUSE	Q80UP8	Slc20a2	Sodium-dependent phosphate transporter 2	0	409.5	0	415.1	459.5	421.5	394.3	548.8	437.8	318.953	432.033	460.3	409.5	432.033	460.3	1.35453	0.077021	0	1.44316	0.09477	0	1.06543	0.587878	0	GO:0005887,integral component of plasma membrane;GO:0016021,integral component of membrane	GO:0005315,inorganic phosphate transmembrane transporter activity;GO:0015319,sodium	GO:0035435,phosphate ion transmembrane transport;GO:0016032,viral process;GO:0006817,phosphate ion transport
MINY1_MOUSE	Q76LS9	Mindy1	Ubiquitin carboxyl-terminal hydrolase MINDY-1	0	0	0	0	0	0	471.3	474.3	407.6	131.242	163.506	451.067			451.067	1.24584	0.017325	1	3.43691	0.000161	1	2.75872	0.000191	1	GO:0071944,cell periphery;GO:0005829,cytosol;GO:0016604,nuclear body;GO:0005654,nucleoplasm	GO:0016807,cysteine-type carboxypeptidase activity;GO:0036435,K48-linked polyubiquitin modification-dependent protein binding;GO:1990380,Lys48-specific deubiquitinase activity;GO:0004843,thiol-dependent ubiquitin-specific protease activity	GO:0071108,protein K48-linked deubiquitination
PRR12_MOUSE	E9PYL2	Prr12	Proline-rich protein 12	128.2	119.6	135.9	143.3	127.4	124.3	117.7	141.4	117.6	127.9	131.667	125.567	127.9	131.667	125.567	1.02945	0.643462	0	0.981757	0.812503	0	0.953671	0.5698	0	GO:0043005,neuron projection;GO:0005634,nucleus;GO:0014069,postsynaptic density	GO:0003677,DNA binding
EXOG_MOUSE	Q8C163	Exog	Nuclease EXOG, mitochondrial	0	0	0	0	0	0	984.3	1089.1	896.8	306.885	182.586	990.067			990.067	0.594967	0.227545	0	3.22618	0.002607	1	5.42246	0.000153	1	GO:0005743,mitochondrial inner membrane;GO:0005739,mitochondrion;GO:0005634,nucleus;GO:0032991,protein-containing complex	GO:0016787,hydrolase activity;GO:0046872,metal ion binding;GO:0003676,nucleic acid binding;GO:0008409,5'-3' exonuclease activity;GO:0004519,endonuclease activity;GO:0004521,endoribonuclease activity;GO:0004518,nuclease activity;GO:0000014,single-stranded DNA endodeoxyribonuclease activity	GO:0006309,apoptotic DNA fragmentation;GO:0000737,DNA catabolic process
A0A140LIW3_MOUSE	A0A140LIW3	Frmpd3	FERM and PDZ domain-containing 3	58.5	57.7	70.7	66.8	65.8	66.2	59.9	64.6	68.1	62.3	66.2667	64.2	62.3	66.2667	64.2	1.06367	0.400085	0	1.0305	0.714154	0	0.968813	0.43655	0	GO:0005856,cytoskeleton
DHSD_MOUSE	Q9CXV1	Sdhd	Succinate dehydrogenase [ubiquinone] cytochrome b small subunit, mitochondrial	264.9	259.3	312.1	292.6	241.4	256.8	219.5	248	246.3	278.767	263.6	237.933	278.767	263.6	237.933	0.945594	0.53879	0	0.853521	0.099577	0	0.90263	0.22179	0	GO:0016021,integral component of membrane;GO:0005743,mitochondrial inner membrane;GO:0005749,mitochondrial respiratory chain complex II;GO:0005739,mitochondrion	GO:0020037,heme binding;GO:0046872,metal ion binding;GO:0008177,succinate dehydrogenase (ubiquinone) activity;GO:0000104,succinate dehydrogenase activity;GO:0048039,ubiquinone binding	GO:0071456,cellular response to hypoxia;GO:0006121,mitochondrial electron transport;GO:0050433,regulation of catecholamine secretion;GO:0006099,tricarboxylic acid cycle	mmu:66925,path:mmu00020,Citrate cycle (TCA cycle);mmu:66925,path:mmu00190,Oxidative phosphorylation;mmu:66925,path:mmu04714,Thermogenesis;mmu:66925,path:mmu05010,Alzheimer disease;mmu:66925,path:mmu05012,Parkinson disease;mmu:66925,path:mmu05016,Huntington disease;mmu:66925,path:mmu04932,Non-alcoholic fatty liver disease (NAFLD)
TEFF2_MOUSE	Q9QYM9	Tmeff2	Tomoregulin-2	0	0	0	0	0	0	0	0	268.1	159.972	252.934	294.992			268.1	1.58111	0.098147	0	1.84403	0.001779	1	1.16628	0.413877	0	GO:0005604,basement membrane;GO:0016021,integral component of membrane;GO:0005886,plasma membrane		GO:0009887,animal organ morphogenesis;GO:0016358,dendrite development;GO:0008045,motor neuron axon guidance;GO:0030336,negative regulation of cell migration;GO:0045720,negative regulation of integrin biosynthetic process;GO:0051497,negative regulation of stress fiber assembly;GO:0007528,neuromuscular junction development;GO:0043113,receptor clustering;GO:0009888,tissue development;GO:0044319,woun…
PCBP4_MOUSE	P57724	Pcbp4	Poly(rC)-binding protein 4	182.1	175.7	193.9	208.5	187.2	201.4	153.8	185.9	148.8	183.9	199.033	162.833	183.9	199.033	162.833	1.08229	0.139547	0	0.885445	0.174807	0	0.818121	0.051805	0	GO:0005829,cytosol;GO:0005737,cytoplasm;GO:0005634,nucleus	GO:0003723,RNA binding;GO:0003730,mRNA 3'-UTR binding;GO:0003677,DNA binding;GO:0003729,mRNA binding	GO:0043488,regulation of mRNA stability;GO:1902163,negative regulation of DNA damage response;GO:0048025,negative regulation of mRNA splicing;GO:0010468,regulation of gene expression;GO:0051252,regulation of RNA metabolic process
PAQR9_MOUSE	Q6TCG2	Paqr9	Membrane progesterone receptor epsilon	137.6	130.8	159.7	157.7	138.5	139.5	120.4	136.9	126.4	142.7	145.233	127.9	142.7	145.233	127.9	1.01775	0.824885	0	0.896286	0.211768	0	0.880652	0.092859	0	GO:0016021,integral component of membrane;GO:0005886,plasma membrane	GO:0038023,signaling receptor activity;GO:0005496,steroid binding
ALG1_MOUSE	Q921Q3	Alg1	Chitobiosyldiphosphodolichol beta-mannosyltransferase	139.1	133.1	151	143.4	132.6	150.6	137.6	147.2	122.7	141.067	142.2	135.833	141.067	142.2	135.833	1.00803	0.885969	0	0.962902	0.58643	0	0.955227	0.511274	0	GO:0005783,endoplasmic reticulum;GO:0005789,endoplasmic reticulum membrane;GO:0016021,integral component of membrane	GO:0004578,chitobiosyldiphosphodolichol beta-mannosyltransferase activity;GO:0000030,mannosyltransferase activity	GO:0006486,protein glycosylation	mmu:208211,path:mmu00510,N-Glycan biosynthesis;mmu:208211,path:mmu00513,Various types of N-glycan biosynthesis
VWA1_MOUSE	Q8R2Z5	Vwa1	von Willebrand factor A domain-containing protein 1	274.6	278.1	285.2	304	276.6	307.8	248	263.7	251.9	279.3	296.133	254.533	279.3	296.133	254.533	1.06027	0.177895	0	0.911326	0.01189	0	0.859523	0.018849	0	GO:0005604,basement membrane;GO:0062023,collagen-containing extracellular matrix;GO:0031012,extracellular matrix;GO:0005576,extracellular region;GO:0005615,extracellular space;GO:0005614,interstitial matrix	GO:0042802,identical protein binding	GO:0048266,behavioral response to pain;GO:0001867,complement activation;GO:0030198,extracellular matrix organization;GO:0003429,growth plate cartilage chondrocyte morphogenesis
BTBD1_MOUSE	P58544	Btbd1	BTB/POZ domain-containing protein 1	78.9	84.6	93.1	100.7	81.2	83	63.7	85.3	78.9	85.5333	88.3	75.9667	85.5333	88.3	75.9667	1.03235	0.729725	0	0.888153	0.277604	0	0.860325	0.239377	0	GO:0005829,cytosol;GO:0000932,P-body;GO:0032991,protein-containing complex	GO:0097602,cullin family protein binding	GO:0007517,muscle organ development;GO:0022008,neurogenesis;GO:0016567,protein ubiquitination
NDUC2_MOUSE	Q9CQ54	Ndufc2	NADH dehydrogenase [ubiquinone] 1 subunit C2	0	0	0	0	0	0	0	0	642.4	152.536	256.572	322.783			642.4	1.68204	0.048738	1	2.11611	0.347739	0	1.25806	0.707047	0	GO:0016021,integral component of membrane;GO:0005743,mitochondrial inner membrane;GO:0070469,respirasome;GO:0005737,cytoplasm;GO:0005747,mitochondrial respiratory chain complex I;GO:0005739,mitochondrion	GO:0008137,NADH dehydrogenase (ubiquinone) activity	GO:0006120,mitochondrial electron transport;GO:0032981,mitochondrial respiratory chain complex I assembly;GO:0060547,negative regulation of necrotic cell death;GO:1901223,negative regulation of NIK/NF-kappaB signaling;GO:1903427,negative regulation of reactive oxygen species biosynthetic process;GO:2001171,positive regulation of ATP biosynthetic process;GO:0010918,positive regulation of mitochond…	mmu:68197,path:mmu00190,Oxidative phosphorylation;mmu:68197,path:mmu04723,Retrograde endocannabinoid signaling;mmu:68197,path:mmu04714,Thermogenesis;mmu:68197,path:mmu05010,Alzheimer disease;mmu:68197,path:mmu05012,Parkinson disease;mmu:68197,path:mmu05016,Huntington disease;mmu:68197,path:mmu04932,Non-alcoholic fatty liver disease (NAFLD)
Q8CE04_MOUSE	Q8CE04	Cast	Calpain inhibitor	497.4	540.5	572.7	585.4	528.2	500.2	469.6	503.8	478.3	536.867	537.933	483.9	536.867	537.933	483.9	1.00199	0.975932	0	0.901341	0.092942	0	0.899554	0.116845	0	GO:0005829,cytosol;GO:0005783,endoplasmic reticulum;GO:0016020,membrane;GO:0005737,cytoplasm;GO:0005634,nucleus;GO:0014069,postsynaptic density	GO:0010859,calcium-dependent cysteine-type endopeptidase inhibitor activity;GO:0002020,protease binding	GO:0097340,inhibition of cysteine-type endopeptidase activity;GO:2000675,negative regulation of type B pancreatic cell apoptotic process;GO:0007343,egg activation;GO:0043086,negative regulation of catalytic activity;GO:0071157,negative regulation of cell cycle arrest;GO:0010466,negative regulation of peptidase activity;GO:0030163,protein catabolic process
INF2_MOUSE	Q0GNC1	Inf2	Inverted formin-2	141.1	139.3	165.6	182	132.3	163.7	122.2	156.8	122.6	148.667	159.333	133.867	148.667	159.333	133.867	1.07175	0.560196	0	0.900448	0.35806	0	0.840167	0.24059	0	GO:0048471,perinuclear region of cytoplasm	GO:0003779,actin binding;GO:0017048,Rho GTPase binding	GO:0030036,actin cytoskeleton organization;GO:0090140,regulation of mitochondrial fission;GO:0032535,regulation of cellular component size
GFOD1_MOUSE	Q3UHD2	Gfod1	Glucose-fructose oxidoreductase domain-containing protein 1	348	351.2	416.9	404.7	347.5	361.7	325.7	369.9	352.7	372.033	371.3	349.433	372.033	371.3	349.433	0.998029	0.980555	0	0.939253	0.431749	0	0.941108	0.366137	0	GO:0005576,extracellular region	GO:0016491,oxidoreductase activity
DCTN6_MOUSE	Q9WUB4	Dctn6	Dynactin subunit 6	0	0	0	0	0	0	0	0	155.8	323.498	178.431	183.916			155.8	0.551567	0.10063	0	0.568522	0.110179	0	1.03074	0.821332	0	GO:0005813,centrosome;GO:0005869,dynactin complex;GO:0000777,condensed chromosome kinetochore;GO:0005739,mitochondrion	GO:0003824,catalytic activity;GO:0070840,dynein complex binding	GO:0008610,lipid biosynthetic process;GO:0007005,mitochondrion organization;GO:0007052,mitotic spindle organization	mmu:22428,path:mmu04962,Vasopressin-regulated water reabsorption
KNG1_MOUSE	O08677	Kng1	Kininogen-1	246.6	213.2	277.2	200.8	238.6	246.8	195.7	267.2	224.4	245.667	228.733	229.1	245.667	228.733	229.1	0.931072	0.507381	0	0.932564	0.583369	0	1.0016	0.989063	0	GO:0062023,collagen-containing extracellular matrix;GO:0005576,extracellular region;GO:0005615,extracellular space	GO:0004869,cysteine-type endopeptidase inhibitor activity;GO:0004866,endopeptidase inhibitor activity;GO:0005102,signaling receptor binding	GO:0007596,blood coagulation;GO:0006954,inflammatory response;GO:0030195,negative regulation of blood coagulation;GO:0010951,negative regulation of endopeptidase activity;GO:0007204,positive regulation of cytosolic calcium ion concentration;GO:0042311,vasodilation	mmu:16644,path:mmu04071,Sphingolipid signaling pathway;mmu:16644,path:mmu04022,cGMP-PKG signaling pathway;mmu:16644,path:mmu04080,Neuroactive ligand-receptor interaction;mmu:16644,path:mmu04810,Regulation of actin cytoskeleton;mmu:16644,path:mmu04610,Complement and coagulation cascades;mmu:16644,path:mmu04750,Inflammatory mediator regulation of TRP channels;mmu:16644,path:mmu05200,Pathways in can…
PPAC_MOUSE	Q9D358	Acp1	Low molecular weight phosphotyrosine protein phosphatase	388.1	360.3	400.1	396.6	352.9	391	335.3	346.7	334.8	382.833	380.167	338.933	382.833	380.167	338.933	0.993034	0.889968	0	0.885329	0.024076	0	0.891539	0.044569	0	GO:0005737,cytoplasm;GO:0009898,cytoplasmic side of plasma membrane;GO:0005829,cytosol;GO:0042383,sarcolemma	GO:0003993,acid phosphatase activity;GO:0004726,non-membrane spanning protein tyrosine phosphatase activity;GO:0004725,protein tyrosine phosphatase activity;GO:0016791,phosphatase activity		mmu:11431,path:mmu00730,Thiamine metabolism;mmu:11431,path:mmu00740,Riboflavin metabolism;mmu:11431,path:mmu04520,Adherens junction
MTMRC_MOUSE	Q80TA6	Mtmr12	Myotubularin-related protein 12	147	121	149.3	130	130.3	128.9	119.5	124.7	107.8	139.1	129.733	117.333	139.1	129.733	117.333	0.932662	0.360763	0	0.843518	0.103519	0	0.904419	0.068775	0	GO:0005737,cytoplasm;GO:0030017,sarcomere;GO:0016529,sarcoplasmic reticulum	GO:0019208,phosphatase regulator activity;GO:0004438,phosphatidylinositol-3-phosphatase activity	GO:0046856,phosphatidylinositol dephosphorylation;GO:1901998,toxin transport
PSB4_MOUSE	P99026	Psmb4	Proteasome subunit beta type-4	2560.3	2421.9	2264.2	2468.7	2404.3	2526.8	2212.1	2170.2	2049.9	2415.47	2466.6	2144.07	2415.47	2466.6	2144.07	1.02117	0.610084	0	0.887641	0.050926	0	0.86924	0.005828	0	GO:0005737,cytoplasm;GO:0005829,cytosol;GO:0005654,nucleoplasm;GO:0005634,nucleus;GO:0000502,proteasome complex;GO:0005839,proteasome core complex;GO:0019774,proteasome core complex	GO:0004175,endopeptidase activity;GO:0001530,lipopolysaccharide binding;GO:0004298,threonine-type endopeptidase activity	GO:0002862,negative regulation of inflammatory response to antigenic stimulus;GO:0010498,proteasomal protein catabolic process;GO:0010499,proteasomal ubiquitin-independent protein catabolic process;GO:0043161,proteasome-mediated ubiquitin-dependent protein catabolic process	mmu:19172,path:mmu03050,Proteasome
COMD9_MOUSE	Q8K2Q0	Commd9	COMM domain-containing protein 9	0	0	0	0	193.8	184.6	174.9	203	194.9	261.05	171.235	190.933		189.2	190.933	0.655947	0.28156	0	0.731405	0.37563	0	1.11504	0.380173	0	GO:0031410,cytoplasmic vesicle;GO:0005829,cytosol;GO:0005794,Golgi apparatus;GO:0005654,nucleoplasm		GO:0042632,cholesterol homeostasis;GO:0006814,sodium ion transport
XYLK_MOUSE	Q8VCS3	Fam20b	Glycosaminoglycan xylosylkinase	278.7	289.1	322	316.8	289.6	283.8	282.6	336	280.1	296.6	296.733	299.567	296.6	296.733	299.567	1.00045	0.993956	0	1.01	0.90112	0	1.00955	0.898601	0	GO:0062023,collagen-containing extracellular matrix;GO:0005794,Golgi apparatus;GO:0000139,Golgi membrane;GO:0016021,integral component of membrane;GO:0005654,nucleoplasm	GO:0005524,ATP binding;GO:0016301,kinase activity;GO:0046872,metal ion binding;GO:0016773,phosphotransferase activity	GO:0016310,phosphorylation;GO:0030166,proteoglycan biosynthetic process
SHD_MOUSE	O88834	Shd	SH2 domain-containing adapter protein D	131.5	138.1	138.2	136.7	140.3	127	110.8	127.1	118.9	135.933	134.667	118.933	135.933	134.667	118.933	0.990682	0.794447	0	0.874939	0.030839	0	0.883168	0.062962	0		GO:0001784,phosphotyrosine residue binding
LRRT2_MOUSE	Q8BGA3	Lrrtm2	Leucine-rich repeat transmembrane neuronal protein 2	0	0	0	0	323	348.4	293.7	335.9	292.8	341.764	319.102	307.467		335.7	307.467	0.933692	0.636052	0	0.899646	0.46843	0	0.963536	0.640276	0	GO:0016021,integral component of membrane;GO:0060076,excitatory synapse;GO:0005615,extracellular space;GO:0098982,GABA-ergic synapse;GO:0098978,glutamatergic synapse;GO:0098686,hippocampal mossy fiber to CA3 synapse;GO:0099061,integral component of postsynaptic density membrane;GO:0099060,integral component of postsynaptic specialization membrane;GO:0098685,Schaffer collateral - CA1 synapse	GO:0042043,neurexin family protein binding	GO:0060291,long-term synaptic potentiation;GO:0002091,negative regulation of receptor internalization;GO:0051965,positive regulation of synapse assembly;GO:0099151,regulation of postsynaptic density assembly;GO:0050808,synapse organization
B7ZCT1_MOUSE	B7ZCT1	Rgs19	Regulator of G-protein-signaling 19	0	0	0	0	250.9	251.4	229.7	235.9	241	252.672	248.841	235.533		251.15	235.533	0.984839	0.823519	0	0.932171	0.351177	0	0.94652	0.02926	0	GO:0005903,brush border;GO:0030136,clathrin-coated vesicle;GO:0045121,membrane raft;GO:0005737,cytoplasm;GO:0016020,membrane	GO:0001965,G-protein alpha-subunit binding	GO:0045471,response to ethanol;GO:0009968,negative regulation of signal transduction
HEM2_MOUSE	P10518	Alad	Delta-aminolevulinic acid dehydratase	184.4	800.2	225.1	863	775.9	779.1	703.5	816.7	714.2	403.233	806	744.8	403.233	806	744.8	1.99884	0.115435	0	1.84707	0.16624	0	0.924069	0.254067	0	GO:0005829,cytosol;GO:0005615,extracellular space	GO:0042802,identical protein binding;GO:0004655,porphobilinogen synthase activity;GO:1904854,proteasome core complex binding;GO:0008270,zinc ion binding	GO:0071353,cellular response to interleukin-4;GO:0071284,cellular response to lead ion;GO:0006783,heme biosynthetic process;GO:1901799,negative regulation of proteasomal protein catabolic process;GO:0051260,protein homooligomerization;GO:0006782,protoporphyrinogen IX biosynthetic process;GO:0014823,response to activity;GO:0010044,response to aluminum ion;GO:0043200,response to amino acid;GO:00466…	mmu:17025,path:mmu00860,Porphyrin and chlorophyll metabolism
TIM50_MOUSE	Q9D880	Timm50	Mitochondrial import inner membrane translocase subunit TIM50	1463.3	1489.2	1569.5	1557.1	1444.8	1589.6	2036.7	2256	2064.3	1507.33	1530.5	2119	1507.33	1530.5	2119	1.01537	0.691489	0	1.40579	0.001295	1	1.38451	0.001972	1	GO:0016021,integral component of membrane;GO:0005743,mitochondrial inner membrane;GO:0005739,mitochondrion;GO:0016607,nuclear speck;GO:0005654,nucleoplasm;GO:0005744,TIM23 mitochondrial import inner membrane translocase complex	GO:0005134,interleukin-2 receptor binding;GO:0004721,phosphoprotein phosphatase activity;GO:0004722,protein serine/threonine phosphatase activity;GO:0004725,protein tyrosine phosphatase activity;GO:0043021,ribonucleoprotein complex binding	GO:0007006,mitochondrial membrane organization;GO:0006470,protein dephosphorylation;GO:0030150,protein import into mitochondrial matrix;GO:0001836,release of cytochrome c from mitochondria
PTGDS_MOUSE	O09114	Ptgds	Prostaglandin-H2 D-isomerase	0	0	0	0	344.5	353.6	390.1	385.5	341.1	128.184	272.131	372.233		349.05	372.233	2.12297	0.138087	0	2.90389	0.000233	1	1.36785	0.271447	0	GO:0005576,extracellular region;GO:0005615,extracellular space;GO:0005794,Golgi apparatus;GO:0031965,nuclear membrane;GO:0048471,perinuclear region of cytoplasm;GO:0005791,rough endoplasmic reticulum	GO:0005504,fatty acid binding;GO:0004667,prostaglandin-D synthase activity;GO:0005501,retinoid binding	GO:2000255,negative regulation of male germ cell proliferation;GO:0001516,prostaglandin biosynthetic process;GO:0045187,regulation of circadian sleep/wake cycle;GO:0051384,response to glucocorticoid	mmu:19215,path:mmu00590,Arachidonic acid metabolism
CASP3_MOUSE	P70677	Casp3	Caspase-3	444	454.3	460.9	477.6	454.2	459.9	381.1	424.5	392	453.067	463.9	399.2	453.067	463.9	399.2	1.02391	0.275857	0	0.881107	0.018049	0	0.86053	0.012001	0	GO:0005737,cytoplasm;GO:0005829,cytosol;GO:0031264,death-inducing signaling complex;GO:0045121,membrane raft;GO:0043025,neuronal cell body;GO:0005634,nucleus	GO:0004197,cysteine-type endopeptidase activity;GO:0004190,aspartic-type endopeptidase activity;GO:0004861,cyclin-dependent protein serine/threonine kinase inhibitor activity;GO:0097153,cysteine-type endopeptidase activity involved in apoptotic process;GO:0097199,cysteine-type endopeptidase activity involved in apoptotic signaling pathway;GO:0097200,cysteine-type endopeptidase activity involved i…	GO:0061713,anterior neural tube closure;GO:0006915,apoptotic process;GO:0007413,axonal fasciculation;GO:0001782,B cell homeostasis;GO:0045165,cell fate commitment;GO:0006974,cellular response to DNA damage stimulus;GO:0071310,cellular response to organic substance;GO:0072734,cellular response to staurosporine;GO:0030218,erythrocyte differentiation;GO:0097194,execution phase of apoptosis;GO:003434…	mmu:12367,path:mmu04010,MAPK signaling pathway;mmu:12367,path:mmu04668,TNF signaling pathway;mmu:12367,path:mmu04210,Apoptosis;mmu:12367,path:mmu04215,Apoptosis - multiple species;mmu:12367,path:mmu04115,p53 signaling pathway;mmu:12367,path:mmu04650,Natural killer cell mediated cytotoxicity;mmu:12367,path:mmu04657,IL-17 signaling pathway;mmu:12367,path:mmu04726,Serotonergic synapse;mmu:12367,path…
S7A14_MOUSE	Q8BXR1	Slc7a14	Probable cationic amino acid transporter	118.3	148.2	128.7	139.3	141.9	132.2	106.8	142.1	125.6	131.733	137.8	124.833	131.733	137.8	124.833	1.04605	0.546926	0	0.947621	0.634873	0	0.905902	0.288421	0	GO:0016021,integral component of membrane;GO:0005829,cytosol;GO:0043231,intracellular membrane-bounded organelle;GO:0005765,lysosomal membrane;GO:0005654,nucleoplasm;GO:0005886,plasma membrane	GO:0022857,transmembrane transporter activity;GO:0015171,amino acid transmembrane transporter activity	GO:0006865,amino acid transport;GO:0010923,negative regulation of phosphatase activity
ALS2_MOUSE	Q920R0	Als2	Alsin	0	0	0	0	0	0	0	0	127.7	367.083	229.601	127.727			127.7	0.625474	0.104868	0	0.347951	0.000448	-1	0.5563	0.17734	0	GO:0030424,axon;GO:0005813,centrosome;GO:0005737,cytoplasm;GO:0005829,cytosol;GO:0030425,dendrite;GO:0043197,dendritic spine;GO:0005769,early endosome;GO:0030426,growth cone;GO:0043231,intracellular membrane-bounded organelle;GO:0030027,lamellipodium;GO:0016020,membrane;GO:0043005,neuron projection;GO:0043025,neuronal cell body;GO:0005634,nucleus;GO:0014069,postsynaptic density;GO:0032991,protein…	GO:0005096,GTPase activator activity;GO:0042802,identical protein binding;GO:0042803,protein homodimerization activity;GO:0043539,protein serine/threonine kinase activator activity;GO:0017137,Rab GTPase binding;GO:0017112,Rab guanyl-nucleotide exchange factor activity;GO:0048365,Rac GTPase binding;GO:0030676,Rac guanyl-nucleotide exchange factor activity	GO:0007409,axonogenesis;GO:0001662,behavioral fear response;GO:0008219,cell death;GO:0016197,endosomal transport;GO:0007032,endosome organization;GO:0001701,in utero embryonic development;GO:0007626,locomotory behavior;GO:0007041,lysosomal transport;GO:0007528,neuromuscular junction development;GO:0048812,neuron projection morphogenesis;GO:0043547,positive regulation of GTPase activity;GO:0045860…	mmu:74018,path:mmu05014,Amyotrophic lateral sclerosis (ALS)
WDR44_MOUSE	Q6NVE8	Wdr44	WD repeat-containing protein 44	864.4	852.8	886.6	928.5	832.9	856.7	1453.1	1576.5	1431.8	867.933	872.7	1487.13	867.933	872.7	1487.13	1.00549	0.882986	0	1.71342	0.000179	1	1.70406	0.000328	1	GO:0005829,cytosol;GO:0010008,endosome membrane;GO:0005794,Golgi apparatus;GO:0005874,microtubule;GO:0048471,perinuclear region of cytoplasm	GO:0017137,Rab GTPase binding	GO:0030334,regulation of cell migration
A0A087WSS1_MOUSE	A0A087WSS1	Relch	RAB11-binding protein RELCH	0	0	0	0	123.3	118.4	100.9	129.1	92.2	242.01	217.212	107.4		120.85	107.4	0.897532	0.844445	0	0.443783	0.126113	0	0.494448	0.320925	0	GO:0055037,recycling endosome;GO:0005802,trans-Golgi network		GO:0032367,intracellular cholesterol transport
ORN_MOUSE	Q9D8S4	Rexo2	Oligoribonuclease, mitochondrial	0	0	0	0	0	0	647.9	746.4	669.6	268.513	190.105	687.967			687.967	0.707994	0.289777	0	2.56214	0.000207	1	3.61887	0.002039	1	GO:0005925,focal adhesion;GO:0005758,mitochondrial intermembrane space;GO:0005759,mitochondrial matrix;GO:0005739,mitochondrion;GO:0005730,nucleolus;GO:0005634,nucleus	GO:0000175,3'-5'-exoribonuclease activity;GO:0003676,nucleic acid binding;GO:0008408,3'-5' exonuclease activity	GO:0006139,nucleobase-containing compound metabolic process	mmu:104444,path:mmu03008,Ribosome biogenesis in eukaryotes
PYM1_MOUSE	Q8CHP5	Pym1	Partner of Y14 and mago	304.3	297.8	295.6	306.1	305.8	327.8	273	286	263.3	299.233	313.233	274.1	299.233	313.233	274.1	1.04679	0.14467	0	0.916008	0.023754	0	0.875067	0.016294	0	GO:0030054,cell junction;GO:0005737,cytoplasm;GO:0005829,cytosol;GO:0035145,exon-exon junction complex;GO:0005730,nucleolus;GO:0005654,nucleoplasm	GO:0043022,ribosome binding;GO:0003723,RNA binding	GO:1903259,exon-exon junction complex disassembly;GO:0000184,nuclear-transcribed mRNA catabolic process;GO:0045727,positive regulation of translation	mmu:78428,path:mmu03013,RNA transport;mmu:78428,path:mmu03015,mRNA surveillance pathway
RAP2A_MOUSE	Q80ZJ1	Rap2a	Ras-related protein Rap-2a	69.3	83.9	72.6	90.4	92.4	91.4	77.2	89.3	86.6	75.2667	91.4	84.3667	75.2667	91.4	84.3667	1.21435	0.022379	1	1.1209	0.188284	0	0.923049	0.131052	0	GO:0005829,cytosol;GO:0016020,membrane;GO:0030496,midbody;GO:0005886,plasma membrane;GO:0055037,recycling endosome;GO:0055038,recycling endosome membrane	GO:0019003,GDP binding;GO:0005525,GTP binding;GO:0003924,GTPase activity;GO:0000287,magnesium ion binding	GO:0031532,actin cytoskeleton reorganization;GO:0034613,cellular protein localization;GO:0035690,cellular response to drug;GO:0045184,establishment of protein localization;GO:0030033,microvillus assembly;GO:0030336,negative regulation of cell migration;GO:0031954,positive regulation of protein autophosphorylation;GO:0001934,positive regulation of protein phosphorylation;GO:0072659,protein localiz…
RAB30_MOUSE	Q923S9	Rab30	Ras-related protein Rab-30	0	0	0	0	0	0	119.5	127	126.7	239.558	138.251	124.4			124.4	0.577109	0.076139	0	0.519291	0.024153	-1	0.899813	0.642728	0	GO:0005801,cis-Golgi network;GO:0012505,endomembrane system;GO:0031985,Golgi cisterna;GO:0043231,intracellular membrane-bounded organelle;GO:0016020,membrane;GO:0005802,trans-Golgi network	GO:0005525,GTP binding;GO:0003924,GTPase activity	GO:0007030,Golgi organization;GO:0006886,intracellular protein transport;GO:0032482,Rab protein signal transduction
GRIN3_MOUSE	Q8BWS5	Gprin3	G protein-regulated inducer of neurite outgrowth 3	0	0	0	0	0	0	0	0	241.6	162.521	113.052	125.544			241.6	0.695617	0.098491	0	0.772482	0.57747	0	1.1105	0.844412	0
A0A075B5Y1_MOUSE	A0A075B5Y1	Ighv1-74	Immunoglobulin heavy variable V1-74	389.6	434.1	389.5	402.8	347	361	301.9	395.3	367.8	404.4	370.267	355	404.4	370.267	355	0.915595	0.202123	0	0.877844	0.191216	0	0.958768	0.66192	0	GO:0009897,external side of plasma membrane;GO:0042571,immunoglobulin complex	GO:0003823,antigen binding;GO:0034987,immunoglobulin receptor binding	GO:0050853,B cell receptor signaling pathway;GO:0006958,complement activation;GO:0042742,defense response to bacterium;GO:0045087,innate immune response;GO:0006911,phagocytosis;GO:0006910,phagocytosis;GO:0050871,positive regulation of B cell activation
RM37_MOUSE	Q921S7	Mrpl37	39S ribosomal protein L37, mitochondrial	199.3	174.3	193.6	198.1	172.8	200.7	170.1	172.8	150.4	189.067	190.533	164.433	189.067	190.533	164.433	1.00776	0.906123	0	0.869711	0.075931	0	0.863016	0.083142	0	GO:0005762,mitochondrial large ribosomal subunit;GO:0005761,mitochondrial ribosome;GO:0005739,mitochondrion	GO:0003735,structural constituent of ribosome	GO:0006412,translation
RNF41_MOUSE	Q8BH75	Rnf41	E3 ubiquitin-protein ligase NRDP1	125.8	116.4	132.6	128.8	120.6	127.9	108.7	110.1	107.5	124.933	125.767	108.767	124.933	125.767	108.767	1.00667	0.884117	0	0.870598	0.027302	0	0.864829	0.003264	0	GO:0071782,endoplasmic reticulum tubular network;GO:0048471,perinuclear region of cytoplasm	GO:0005128,erythropoietin receptor binding;GO:0042802,identical protein binding;GO:0005135,interleukin-3 receptor binding;GO:0019904,protein domain specific binding;GO:0017160,Ral GTPase binding;GO:0030971,receptor tyrosine kinase binding;GO:0061630,ubiquitin protein ligase activity;GO:0004842,ubiquitin-protein transferase activity;GO:0008270,zinc ion binding	GO:0006914,autophagy;GO:0097191,extrinsic apoptotic signaling pathway;GO:0030336,negative regulation of cell migration;GO:0008285,negative regulation of cell population proliferation;GO:1901525,negative regulation of mitophagy;GO:0051091,positive regulation of DNA-binding transcription factor activity;GO:0045732,positive regulation of protein catabolic process;GO:2000379,positive regulation of re…	mmu:67588,path:mmu04144,Endocytosis
A0A1L1SRX2_MOUSE	A0A1L1SRX2	Ampd3	AMP deaminase	0	0	0	0	0	0	0	0	243.1	252.606	358.281	231.015			243.1	1.41834	0.02791	1	0.914527	0.281641	0	0.644787	0.013197	-1	GO:0005829,cytosol	GO:0003876,AMP deaminase activity;GO:0046872,metal ion binding	GO:0032264,IMP salvage;GO:0046031,ADP metabolic process;GO:0046033,AMP metabolic process;GO:0046034,ATP metabolic process;GO:0097009,energy homeostasis;GO:0034101,erythrocyte homeostasis;GO:0046039,GTP metabolic process;GO:0006188,IMP biosynthetic process	mmu:11717,path:mmu00230,Purine metabolism
FLII_MOUSE	Q9JJ28	Flii	Protein flightless-1 homolog	0	0	0	0	0	0	353.8	369.7	348.6	233.235	162.876	357.367			357.367	0.698336	0.130569	0	1.53222	0.027962	1	2.1941	4.2e-05	1	GO:0015629,actin cytoskeleton;GO:0005903,brush border;GO:0034451,centriolar satellite;GO:0005737,cytoplasm;GO:0005829,cytosol;GO:0005925,focal adhesion;GO:0005654,nucleoplasm;GO:0005634,nucleus	GO:0003779,actin binding;GO:0051015,actin filament binding	GO:0030036,actin cytoskeleton organization;GO:0051014,actin filament severing;GO:0008154,actin polymerization or depolymerization;GO:0007275,multicellular organism development;GO:0030239,myofibril assembly
A2BIN0_MOUSE	A2BIN0	Mup9	Major urinary protein 11	289.9	303.2	354.4	237.1	211.7	169.3	176.9	222.7	169.5	315.833	206.033	189.7	315.833	206.033	189.7	0.652348	0.016998	-1	0.600633	0.008061	-1	0.920725	0.561709	0		GO:0036094,small molecule binding
A2AJ26_MOUSE	A2AJ26	Abca2	ATP-binding cassette sub-family A member 2	64.7	70.5	71.7	74.1	75.1	82.5	63	100.3	65.9	68.9667	77.2333	76.4	68.9667	77.2333	76.4	1.11987	0.072926	0	1.10778	0.574422	0	0.98921	0.949106	0	GO:0005768,endosome;GO:0016021,integral component of membrane;GO:0005764,lysosome;GO:0005886,plasma membrane;GO:0031410,cytoplasmic vesicle;GO:0010008,endosome membrane;GO:0043231,intracellular membrane-bounded organelle;GO:0005765,lysosomal membrane;GO:0005815,microtubule organizing center	GO:0005524,ATP binding;GO:0016887,ATPase activity;GO:0042626,ATPase-coupled transmembrane transporter activity;GO:0099038,ceramide floppase activity;GO:0061135,endopeptidase regulator activity;GO:0005319,lipid transporter activity	GO:0090156,cellular sphingolipid homeostasis;GO:0042632,cholesterol homeostasis;GO:0090370,negative regulation of cholesterol efflux;GO:0150110,negative regulation of cholesterol esterification;GO:1905598,negative regulation of low-density lipoprotein receptor activity;GO:0071072,negative regulation of phospholipid biosynthetic process;GO:1905601,negative regulation of receptor-mediated endocytos…
ARHGH_MOUSE	Q80U35	Arhgef17	Rho guanine nucleotide exchange factor 17	53.8	46.4	54	50.6	66.1	52	47.9	56.9	49.7	51.4	56.2333	51.5	51.4	56.2333	51.5	1.09403	0.432641	0	1.00195	0.979823	0	0.915827	0.450214	0		GO:0005089,Rho guanyl-nucleotide exchange factor activity;GO:0005085,guanyl-nucleotide exchange factor activity	GO:0030036,actin cytoskeleton organization
AAPK2_MOUSE	Q8BRK8	Prkaa2	5'-AMP-activated protein kinase catalytic subunit alpha-2	327.4	307	356.5	342.6	309.6	292	286.7	316	300.8	330.3	314.733	301.167	330.3	314.733	301.167	0.952871	0.492807	0	0.911797	0.155428	0	0.956895	0.471341	0	GO:0016324,apical plasma membrane;GO:0030424,axon;GO:0005737,cytoplasm;GO:0010494,cytoplasmic stress granule;GO:0005829,cytosol;GO:0030425,dendrite;GO:0005794,Golgi apparatus;GO:0043025,neuronal cell body;GO:0016607,nuclear speck;GO:0005654,nucleoplasm;GO:0031588,nucleotide-activated protein kinase complex;GO:0005634,nucleus;GO:0032991,protein-containing complex	GO:0050405,[acetyl-CoA carboxylase] kinase activity;GO:0047322,[hydroxymethylglutaryl-CoA reductase (NADPH)] kinase activity;GO:0004679,AMP-activated protein kinase activity;GO:0005524,ATP binding;GO:0003682,chromatin binding;GO:0035174,histone serine kinase activity;GO:0046872,metal ion binding;GO:0004672,protein kinase activity;GO:0004674,protein serine/threonine kinase activity;GO:0004712,prot…	GO:0006914,autophagy;GO:0071277,cellular response to calcium ion;GO:0035690,cellular response to drug;GO:0042149,cellular response to glucose starvation;GO:0071333,cellular response to glucose stimulus;GO:0031669,cellular response to nutrient levels;GO:0034599,cellular response to oxidative stress;GO:0071380,cellular response to prostaglandin E stimulus;GO:0006695,cholesterol biosynthetic process…	mmu:108079,path:mmu04371,Apelin signaling pathway;mmu:108079,path:mmu04068,FoxO signaling pathway;mmu:108079,path:mmu04151,PI3K-Akt signaling pathway;mmu:108079,path:mmu04152,AMPK signaling pathway;mmu:108079,path:mmu04150,mTOR signaling pathway;mmu:108079,path:mmu04140,Autophagy - animal;mmu:108079,path:mmu04530,Tight junction;mmu:108079,path:mmu04910,Insulin signaling pathway;mmu:108079,path:mm…
SIR3_MOUSE	Q8R104	Sirt3	NAD-dependent protein deacetylase sirtuin-3	0	0	0	0	0	0	318.2	320.4	309.2	245.106	213.299	315.933			315.933	0.870232	0.623223	0	1.28897	0.053219	0	1.48118	0.130566	0	GO:0005737,cytoplasm;GO:0016020,membrane;GO:0005743,mitochondrial inner membrane;GO:0005759,mitochondrial matrix;GO:0005739,mitochondrion;GO:0005634,nucleus;GO:0032991,protein-containing complex	GO:0070403,NAD+ binding;GO:0017136,NAD-dependent histone deacetylase activity;GO:0016740,transferase activity;GO:0008270,zinc ion binding;GO:0019899,enzyme binding;GO:0032041,NAD-dependent histone deacetylase activity (H3-K14 specific);GO:0034979,NAD-dependent protein deacetylase activity;GO:0043565,sequence-specific DNA binding	GO:0009060,aerobic respiration;GO:0070932,histone H3 deacetylation;GO:0070373,negative regulation of ERK1 and ERK2 cascade;GO:2000757,negative regulation of peptidyl-lysine acetylation;GO:2000378,negative regulation of reactive oxygen species metabolic process;GO:0034983,peptidyl-lysine deacetylation;GO:1902553,positive regulation of catalase activity;GO:2000304,positive regulation of ceramide bi…	mmu:64384,path:mmu00760,Nicotinate and nicotinamide metabolism;mmu:64384,path:mmu05230,Central carbon metabolism in cancer
EPHB3_MOUSE	P54754	Ephb3	Ephrin type-B receptor 3	67.9	55.9	63.4	73.2	51.3	63.1	53.2	59.1	331.1	62.4	62.5333	147.8	62.4	62.5333	147.8	1.00214	0.986173	0	2.36859	0.40457	0	2.36354	0.405944	0	GO:0016021,integral component of membrane;GO:0030425,dendrite;GO:0005887,integral component of plasma membrane;GO:0043235,receptor complex	GO:0005524,ATP binding;GO:0005003,ephrin receptor activity;GO:0004714,transmembrane receptor protein tyrosine kinase activity;GO:0008046,axon guidance receptor activity;GO:0005005,transmembrane-ephrin receptor activity	GO:0001525,angiogenesis;GO:0007411,axon guidance;GO:0007413,axonal fasciculation;GO:0016477,cell migration;GO:0021952,central nervous system projection neuron axonogenesis;GO:0022038,corpus callosum development;GO:0060996,dendritic spine development;GO:0060997,dendritic spine morphogenesis;GO:0048546,digestive tract morphogenesis;GO:0048013,ephrin receptor signaling pathway;GO:0007275,multicellul…	mmu:13845,path:mmu04360,Axon guidance
RGS14_MOUSE	P97492	Rgs14	Regulator of G-protein signaling 14	192.1	1589.2	218.5	1993.1	1632.7	1734.3	1442.2	1452	1434.4	666.6	1786.7	1442.87	666.6	1786.7	1442.87	2.68032	0.077265	0	2.16452	0.167772	0	0.80756	0.032863	-1	GO:0005813,centrosome;GO:0005737,cytoplasm;GO:0030425,dendrite;GO:0043197,dendritic spine;GO:0098978,glutamatergic synapse;GO:0005874,microtubule;GO:0016604,nuclear body;GO:0005634,nucleus;GO:0005886,plasma membrane;GO:0016605,PML body;GO:0014069,postsynaptic density;GO:0005819,spindle;GO:0000922,spindle pole	GO:0001965,G-protein alpha-subunit binding;GO:0005092,GDP-dissociation inhibitor activity;GO:0032794,GTPase activating protein binding;GO:0005096,GTPase activator activity;GO:0008017,microtubule binding;GO:0019901,protein kinase binding;GO:0030159,signaling receptor complex adaptor activity	GO:0051301,cell division;GO:0007059,chromosome segregation;GO:0007186,G protein-coupled receptor signaling pathway;GO:0035556,intracellular signal transduction;GO:0007612,learning;GO:0007616,long-term memory;GO:0060291,long-term synaptic potentiation;GO:0000278,mitotic cell cycle;GO:0050804,modulation of chemical synaptic transmission;GO:0070373,negative regulation of ERK1 and ERK2 cascade;GO:004…	mmu:51791,path:mmu04015,Rap1 signaling pathway
A0A0R4J2A2_MOUSE	A0A0R4J2A2	Anks1b	Ankyrin repeat and sterile alpha motif domain-containing protein 1B	162.5	151.6	147.7	180.1	160.3	169.1	137.2	150.4	139.7	153.933	169.833	142.433	153.933	169.833	142.433	1.10329	0.093056	0	0.925292	0.12777	0	0.838665	0.017443	0	GO:0005829,cytosol;GO:0043197,dendritic spine;GO:0098978,glutamatergic synapse;GO:0098686,hippocampal mossy fiber to CA3 synapse;GO:0043231,intracellular membrane-bounded organelle;GO:0005634,nucleus;GO:0005886,plasma membrane;GO:0014069,postsynaptic density;GO:0099092,postsynaptic density;GO:0099523,presynaptic cytosol;GO:0098685,Schaffer collateral - CA1 synapse	GO:0046875,ephrin receptor binding	GO:1900383,regulation of synaptic plasticity by receptor localization to synapse;GO:0048013,ephrin receptor signaling pathway;GO:0099527,postsynapse to nucleus signaling pathway;GO:0097120,receptor localization to synapse
MYG1_MOUSE	Q9JK81	Myg1	MYG1 exonuclease	228.1	228.5	250.3	266.8	232.5	225.7	191	235.1	214.8	235.633	241.667	213.633	235.633	241.667	213.633	1.02561	0.702185	0	0.906635	0.208931	0	0.884	0.194469	0	GO:0005737,cytoplasm;GO:0005759,mitochondrial matrix;GO:0005739,mitochondrion;GO:0005730,nucleolus;GO:0005654,nucleoplasm;GO:0005634,nucleus	GO:0004518,nuclease activity	GO:0035641,locomotory exploration behavior
RETR3_MOUSE	Q9CQV4	Retreg3	Reticulophagy regulator 3	254.8	234.5	223.9	254.1	254.3	288.8	218.9	225.5	202.3	237.733	265.733	215.567	237.733	265.733	215.567	1.11778	0.128941	0	0.906758	0.123587	0	0.811214	0.020254	-1	GO:0016021,integral component of membrane;GO:0032991,protein-containing complex		GO:0010976,positive regulation of neuron projection development;GO:0061709,reticulophagy
F171B_MOUSE	Q14CH0	Fam171b	Protein FAM171B	0	330.9	0	350.5	308.9	318.2	274.2	324.9	307.4	195.238	325.867	302.167	330.9	325.867	302.167	1.66908	0.131632	0	1.54768	0.198928	0	0.927271	0.29089	0	GO:0016021,integral component of membrane
NCK1_MOUSE	Q99M51	Nck1	Cytoplasmic protein NCK1	222.8	244.7	259.4	264.3	226.1	254.9	206	231.9	214.3	242.3	248.433	217.4	242.3	248.433	217.4	1.02531	0.715223	0	0.897235	0.129927	0	0.875084	0.087717	0	GO:0005911,cell-cell junction;GO:0005737,cytoplasm;GO:0005829,cytosol;GO:0005783,endoplasmic reticulum;GO:0005634,nucleus;GO:0005886,plasma membrane;GO:0000164,protein phosphatase type 1 complex;GO:0005840,ribosome;GO:0012506,vesicle membrane	GO:0046875,ephrin receptor binding;GO:0071074,eukaryotic initiation factor eIF2 binding;GO:0019904,protein domain specific binding;GO:0004860,protein kinase inhibitor activity;GO:0030971,receptor tyrosine kinase binding;GO:0005102,signaling receptor binding	GO:0007015,actin filament organization;GO:0016477,cell migration;GO:0048013,ephrin receptor signaling pathway;GO:0030032,lamellipodium assembly;GO:0060548,negative regulation of cell death;GO:1903912,negative regulation of endoplasmic reticulum stress-induced eIF2 alpha phosphorylation;GO:0046627,negative regulation of insulin receptor signaling pathway;GO:0033137,negative regulation of peptidyl-…	mmu:17973,path:mmu04012,ErbB signaling pathway;mmu:17973,path:mmu04660,T cell receptor signaling pathway;mmu:17973,path:mmu04360,Axon guidance
KCNB1_MOUSE	Q03717	Kcnb1	Potassium voltage-gated channel subfamily B member 1	176.4	188.3	207.1	176.9	189.7	172.8	179.1	199.4	169.6	190.6	179.8	182.7	190.6	179.8	182.7	0.943337	0.352908	0	0.958552	0.562728	0	1.01613	0.789405	0	GO:0030424,axon;GO:0009986,cell surface;GO:0030425,dendrite;GO:0032590,dendrite membrane;GO:0005783,endoplasmic reticulum;GO:0016021,integral component of membrane;GO:0016328,lateral plasma membrane;GO:0016020,membrane;GO:0043025,neuronal cell body;GO:0032809,neuronal cell body membrane;GO:0043204,perikaryon;GO:0005886,plasma membrane;GO:0045211,postsynaptic membrane;GO:0042383,sarcolemma;GO:0008…	GO:0005251,delayed rectifier potassium channel activity;GO:0044325,ion channel binding;GO:0015271,outward rectifier potassium channel activity;GO:0046982,protein heterodimerization activity;GO:0047485,protein N-terminus binding;GO:0000149,SNARE binding;GO:0005249,voltage-gated potassium channel activity	GO:0001508,action potential;GO:0071333,cellular response to glucose stimulus;GO:0031669,cellular response to nutrient levels;GO:0042593,glucose homeostasis;GO:0007215,glutamate receptor signaling pathway;GO:0046676,negative regulation of insulin secretion;GO:0045956,positive regulation of calcium ion-dependent exocytosis;GO:0033605,positive regulation of catecholamine secretion;GO:1900454,positiv…
Q6P8N8_MOUSE	Q6P8N8	Clpx	ATP-dependent Clp protease ATP-binding subunit clpX-like, mitochondrial	450.8	456.8	472.4	507.1	466.8	443.5	431.1	452.3	409.3	460	472.467	430.9	460	472.467	430.9	1.0271	0.560475	0	0.936739	0.105897	0	0.912022	0.136337	0	GO:0005829,cytosol;GO:0009368,endopeptidase Clp complex;GO:0009841,mitochondrial endopeptidase Clp complex;GO:0005743,mitochondrial inner membrane;GO:0005759,mitochondrial matrix;GO:0042645,mitochondrial nucleoid;GO:0005739,mitochondrion;GO:0005654,nucleoplasm	GO:0005524,ATP binding;GO:0051082,unfolded protein binding;GO:0004176,ATP-dependent peptidase activity;GO:0016887,ATPase activity;GO:0046872,metal ion binding;GO:0016504,peptidase activator activity	GO:0006457,protein folding;GO:0046034,ATP metabolic process;GO:0030163,protein catabolic process;GO:0006508,proteolysis;GO:0051603,proteolysis involved in cellular protein catabolic process
TLE5_MOUSE	P63002	Tle5	TLE family member 5	0	0	0	0	0	0	0	0	449	210.036	152.697	312.002			449	0.727007	0.181359	0	1.48547	0.215633	0	2.04327	0.108718	0	GO:0005634,nucleus;GO:0005654,nucleoplasm;GO:0005667,transcription regulator complex	GO:0042802,identical protein binding;GO:0070491,repressing transcription factor binding;GO:0003714,transcription corepressor activity	GO:0006355,regulation of transcription;GO:0031668,cellular response to extracellular stimulus;GO:0090090,negative regulation of canonical Wnt signaling pathway;GO:0010629,negative regulation of gene expression;GO:0032091,negative regulation of protein binding;GO:0060761,negative regulation of response to cytokine stimulus;GO:0000122,negative regulation of transcription by RNA polymerase II;GO:004…
DNJB4_MOUSE	Q9D832	Dnajb4	DnaJ homolog subfamily B member 4	114.6	125.6	100.8	117.5	908.6	941.7	1326.2	1381.3	1287.4	113.667	655.933	1331.63	113.667	655.933	1331.63	5.77067	0.114504	0	11.7152	2e-06	1	2.03014	0.067084	0	GO:0005829,cytosol;GO:0005654,nucleoplasm;GO:0005886,plasma membrane	GO:0001671,ATPase activator activity;GO:0051087,chaperone binding;GO:0051082,unfolded protein binding	GO:0051085,chaperone cofactor-dependent protein refolding
ARMD3_MOUSE	Q6PD19	Armh3	Armadillo-like helical domain-containing protein 3	223.5	219.1	229.7	238.5	219.3	227.5	200.8	225.8	208.6	224.1	228.433	211.733	224.1	228.433	211.733	1.01934	0.532778	0	0.944816	0.197016	0	0.926893	0.145167	0	GO:0005829,cytosol;GO:0000139,Golgi membrane;GO:0016021,integral component of membrane		GO:1903358,regulation of Golgi organization
PHLP1_MOUSE	Q8CHE4	Phlpp1	PH domain leucine-rich repeat-containing protein phosphatase 1	230.2	283.4	280.2	306	250.4	250.6	209.2	271.7	205.9	264.6	269	228.933	264.6	269	228.933	1.01663	0.870266	0	0.865205	0.26402	0	0.851053	0.229657	0	GO:0005737,cytoplasm;GO:0005887,integral component of plasma membrane;GO:0034702,ion channel complex;GO:0031965,nuclear membrane;GO:0005654,nucleoplasm;GO:0005886,plasma membrane	GO:0046872,metal ion binding;GO:0004722,protein serine/threonine phosphatase activity;GO:0005225,volume-sensitive anion channel activity	GO:0006915,apoptotic process;GO:0015810,aspartate transmembrane transport;GO:0071470,cellular response to osmotic stress;GO:0009649,entrainment of circadian clock;GO:0070373,negative regulation of ERK1 and ERK2 cascade;GO:0051898,negative regulation of protein kinase B signaling;GO:0090038,negative regulation of protein kinase C signaling;GO:0051897,positive regulation of protein kinase B signali…	mmu:98432,path:mmu04151,PI3K-Akt signaling pathway
RB33A_MOUSE	P97950	Rab33a	Ras-related protein Rab-33A	0	535	0	533.3	500.1	519.9	470.5	484.7	476.7	386.521	517.767	477.3	535	517.767	477.3	1.33956	0.155779	0	1.23486	0.290927	0	0.921844	0.018141	0	GO:0012505,endomembrane system;GO:0005886,plasma membrane	GO:0005525,GTP binding;GO:0003924,GTPase activity	GO:0019882,antigen processing and presentation;GO:0006886,intracellular protein transport;GO:0032482,Rab protein signal transduction
SAP3_MOUSE	Q60648	Gm2a	Ganglioside GM2 activator	250.5	279	273.8	301.5	279.1	265.6	236	277.8	237.1	267.767	282.067	250.3	267.767	282.067	250.3	1.0534	0.354017	0	0.934769	0.344471	0	0.887379	0.139949	0	GO:0016324,apical plasma membrane;GO:0016323,basolateral plasma membrane;GO:0009898,cytoplasmic side of plasma membrane;GO:0005764,lysosome;GO:0005739,mitochondrion	GO:0032428,beta-N-acetylgalactosaminidase activity;GO:0004563,beta-N-acetylhexosaminidase activity;GO:0008047,enzyme activator activity;GO:0005319,lipid transporter activity;GO:0016004,phospholipase activator activity	GO:0006689,ganglioside catabolic process;GO:0007611,learning or memory;GO:0019915,lipid storage;GO:0006869,lipid transport;GO:0050877,nervous system process;GO:0050885,neuromuscular process controlling balance;GO:0009313,oligosaccharide catabolic process;GO:0051345,positive regulation of hydrolase activity	mmu:14667,path:mmu04142,Lysosome
C10_MOUSE	O35127	Grcc10	Protein C10	224.5	261.2	221.6	252.7	236.8	241	206.5	217.1	210.2	235.767	243.5	211.267	235.767	243.5	211.267	1.0328	0.600093	0	0.896084	0.135179	0	0.867625	0.004762	0	GO:0005737,cytoplasm;GO:0016607,nuclear speck		GO:0048593,camera-type eye morphogenesis;GO:0050890,cognition;GO:0021540,corpus callosum morphogenesis;GO:0009791,post-embryonic development;GO:0036343,psychomotor behavior;GO:0014819,regulation of skeletal muscle contraction;GO:0021678,third ventricle development
ZDH14_MOUSE	Q8BQQ1	Zdhhc14	Probable palmitoyltransferase ZDHHC14	192.2	198.5	225.6	247.4	193	235.1	179.2	214.9	206.7	205.433	225.167	200.267	205.433	225.167	200.267	1.09606	0.366532	0	0.97485	0.74599	0	0.889415	0.27475	0	GO:0005783,endoplasmic reticulum;GO:0005794,Golgi apparatus;GO:0016021,integral component of membrane	GO:0016409,palmitoyltransferase activity;GO:0019706,protein-cysteine S-palmitoyltransferase activity	GO:0018230,peptidyl-L-cysteine S-palmitoylation;GO:0018345,protein palmitoylation;GO:0006612,protein targeting to membrane
GASP2_MOUSE	Q8BUY8	Gprasp2	G-protein coupled receptor-associated sorting protein 2	83.5	103.7	95.2	104	97.6	91.5	74.4	101.2	77.9	94.1333	97.7	84.5	94.1333	97.7	84.5	1.03789	0.631447	0	0.897663	0.400449	0	0.864893	0.222696	0	GO:0005737,cytoplasm;GO:0005634,nucleus	GO:0001540,amyloid-beta binding;GO:0001664,G protein-coupled receptor binding
RCN1_MOUSE	Q05186	Rcn1	Reticulocalbin-1	127.7	156.4	143.8	153.2	157.1	121.5	143	186.9	151.7	142.633	143.933	160.533	142.633	143.933	160.533	1.00911	0.930493	0	1.1255	0.320087	0	1.11533	0.397208	0	GO:0005783,endoplasmic reticulum;GO:0005788,endoplasmic reticulum lumen	GO:0005509,calcium ion binding	GO:0043010,camera-type eye development;GO:0001701,in utero embryonic development
MACD1_MOUSE	Q922B1	Macrod1	ADP-ribose glycohydrolase MACROD1	417.3	1347.6	446.1	1433.3	1390.2	1602.4	1361.5	1373.2	1184.1	737	1475.3	1306.27	737	1475.3	1306.27	2.00176	0.077257	0	1.77241	0.141619	0	0.885424	0.130621	0	GO:0005739,mitochondrion;GO:0005654,nucleoplasm;GO:0005634,nucleus	GO:0140293,ADP-ribosylglutamate hydrolase activity;GO:0019213,deacetylase activity;GO:0016798,hydrolase activity	GO:0006974,cellular response to DNA damage stimulus;GO:0140291,peptidyl-glutamate ADP-deribosylation;GO:0051725,protein de-ADP-ribosylation;GO:0042278,purine nucleoside metabolic process
ACTBL_MOUSE	Q8BFZ3	Actbl2	Beta-actin-like protein 2	235.2	199.9	235.3	221.9	227.1	222	190.7	228.2	170.3	223.467	223.667	196.4	223.467	223.667	196.4	1.0009	0.987404	0	0.878878	0.260096	0	0.878092	0.184861	0	GO:0005884,actin filament;GO:0005737,cytoplasm;GO:0098978,glutamatergic synapse;GO:0045202,synapse	GO:0005524,ATP binding;GO:0098973,structural constituent of postsynaptic actin cytoskeleton
PTMS_MOUSE	Q9D0J8	Ptms	Parathymosin	352.1	328.7	390	361.5	8758.5	7183.7	9539.4	6903.1	8361.5	356.933	5434.57	8268	356.933	5434.57	8268	15.2257	0.12012	0	23.164	0.000488	1	1.52137	0.351198	0	GO:0005829,cytosol	GO:0008270,zinc ion binding	GO:0002376,immune system process
B7ZMZ7_MOUSE	B7ZMZ7	Dip2c	Dip2c protein	338.7	380.3	354.8	380	358.3	334	301.6	362.8	318.9	357.933	357.433	327.767	357.933	357.433	327.767	0.998603	0.979144	0	0.91572	0.239941	0	0.917001	0.258566	0		GO:0003824,catalytic activity
BAG1_MOUSE	Q60739	Bag1	BAG family molecular chaperone regulator 1	0	349.7	0	365.3	359.8	338.4	325.3	389	339.1	215.212	354.5	351.133	349.7	354.5	351.133	1.64721	0.109382	0	1.63157	0.124481	0	0.990503	0.88049	0	GO:0005737,cytoplasm;GO:0005829,cytosol;GO:0005739,mitochondrion;GO:0005634,nucleus;GO:0048471,perinuclear region of cytoplasm	GO:0051087,chaperone binding;GO:0000774,adenyl-nucleotide exchange factor activity;GO:0051219,phosphoprotein binding;GO:0031625,ubiquitin protein ligase binding	GO:0006915,apoptotic process;GO:0051085,chaperone cofactor-dependent protein refolding;GO:0043066,negative regulation of apoptotic process;GO:2000672,negative regulation of motor neuron apoptotic process;GO:0001933,negative regulation of protein phosphorylation;GO:0030182,neuron differentiation;GO:0043525,positive regulation of neuron apoptotic process;GO:0014040,positive regulation of Schwann ce…	mmu:12017,path:mmu04141,Protein processing in endoplasmic reticulum
D6RIL1_MOUSE	D6RIL1	Nr3c2	Mineralocorticoid receptor	481.2	559.4	547.5	593.2	516.8	464.1	407.8	517	458.3	529.367	524.7	461.033	529.367	524.7	461.033	0.991184	0.921843	0	0.870915	0.161473	0	0.878661	0.263587	0	GO:0042025,host cell nucleus;GO:0005634,nucleus;GO:0005654,nucleoplasm;GO:0043235,receptor complex;GO:0005737,cytoplasm;GO:0005789,endoplasmic reticulum membrane;GO:0098982,GABA-ergic synapse;GO:0098978,glutamatergic synapse;GO:0099092,postsynaptic density;GO:0098831,presynaptic active zone cytoplasmic component	GO:0003700,DNA-binding transcription factor activity;GO:0043565,sequence-specific DNA binding;GO:0008270,zinc ion binding;GO:0003690,double-stranded DNA binding;GO:0042802,identical protein binding;GO:0044877,protein-containing complex binding;GO:0005496,steroid binding;GO:0003707,steroid hormone receptor activity	GO:1901224,positive regulation of NIK/NF-kappaB signaling;GO:0006883,cellular sodium ion homeostasis;GO:0007588,excretion;GO:0042127,regulation of cell population proliferation;GO:0060078,regulation of postsynaptic membrane potential;GO:2000300,regulation of synaptic vesicle exocytosis	mmu:110784,path:mmu04960,Aldosterone-regulated sodium reabsorption
BGAL_MOUSE	P23780	Glb1	Beta-galactosidase	0	0	0	0	0	0	0	0	179.9	210.625	264.652	148.781			179.9	1.2565	0.181181	0	0.706378	0.145695	0	0.562177	0.006385	-1	GO:0005737,cytoplasm;GO:0005615,extracellular space;GO:0005794,Golgi apparatus;GO:0043231,intracellular membrane-bounded organelle;GO:0005764,lysosome;GO:0005773,vacuole	GO:0004553,hydrolase activity;GO:0004565,beta-galactosidase activity;GO:0016936,galactoside binding;GO:0016787,hydrolase activity;GO:0042803,protein homodimerization activity	GO:0005975,carbohydrate metabolic process;GO:0044262,cellular carbohydrate metabolic process;GO:0019388,galactose catabolic process;GO:0051413,response to cortisone;GO:1904016,response to Thyroglobulin triiodothyronine	mmu:12091,path:mmu00052,Galactose metabolism;mmu:12091,path:mmu00600,Sphingolipid metabolism;mmu:12091,path:mmu00531,Glycosaminoglycan degradation;mmu:12091,path:mmu00604,Glycosphingolipid biosynthesis - ganglio series;mmu:12091,path:mmu00511,Other glycan degradation;mmu:12091,path:mmu04142,Lysosome
RCAN1_MOUSE	Q9JHG6	Rcan1	Calcipressin-1	666.6	632.2	691	691.4	613.5	649.2	597.4	628.6	602.9	663.267	651.367	609.633	663.267	651.367	609.633	0.982058	0.695179	0	0.919138	0.051944	0	0.93593	0.16345	0	GO:0005737,cytoplasm;GO:0005634,nucleus	GO:0008597,calcium-dependent protein serine/threonine phosphatase regulator activity;GO:0042802,identical protein binding;GO:0003676,nucleic acid binding	GO:0033173,calcineurin-NFAT signaling cascade;GO:0031987,locomotion involved in locomotory behavior;GO:0070885,negative regulation of calcineurin-NFAT signaling cascade;GO:0070884,regulation of calcineurin-NFAT signaling cascade;GO:0043666,regulation of phosphoprotein phosphatase activity;GO:0002931,response to ischemia;GO:0006979,response to oxidative stress;GO:0007614,short-term memory;GO:00487…	mmu:54720,path:mmu04921,Oxytocin signaling pathway;mmu:54720,path:mmu04919,Thyroid hormone signaling pathway;mmu:54720,path:mmu05167,Kaposi sarcoma-associated herpesvirus infection
A0A0A6YW53_MOUSE	A0A0A6YW53	Map4k4	Mitogen-activated protein kinase kinase kinase kinase 4	88.6	331.8	79.9	355.5	352.1	336.9	298	294.7	290	166.767	348.167	294.233	166.767	348.167	294.233	2.08775	0.093475	0	1.76434	0.197605	0	0.845093	0.000945	0	GO:0005737,cytoplasm;GO:0005925,focal adhesion	GO:0005524,ATP binding;GO:0004674,protein serine/threonine kinase activity;GO:0004672,protein kinase activity;GO:0004111,creatine kinase activity;GO:0008017,microtubule binding	GO:0061179,negative regulation of insulin secretion involved in cellular response to glucose stimulus;GO:0070571,negative regulation of neuron projection regeneration;GO:0032147,activation of protein kinase activity;GO:0035556,intracellular signal transduction;GO:0043066,negative regulation of apoptotic process;GO:0010977,negative regulation of neuron projection development;GO:0048812,neuron proj…	mmu:26921,path:mmu04010,MAPK signaling pathway
Q62347_MOUSE	Q62347	Creb1	Cyclic AMP-responsive element-binding protein 1	418.6	373.7	441.6	427.5	392.6	399.9	391.1	396.2	377.3	411.3	406.667	388.2	411.3	406.667	388.2	0.988735	0.847528	0	0.943837	0.327408	0	0.95459	0.199686	0	GO:0005634,nucleus;GO:1990589,ATF4-CREB1 transcription factor complex;GO:0030424,axon;GO:0000785,chromatin;GO:0005759,mitochondrial matrix;GO:0005739,mitochondrion;GO:0000790,nuclear chromatin;GO:0005719,nuclear euchromatin;GO:0005654,nucleoplasm;GO:0005667,transcription regulator complex	GO:0003677,DNA binding;GO:0003700,DNA-binding transcription factor activity;GO:1990763,arrestin family protein binding;GO:0035497,cAMP response element binding;GO:0001228,DNA-binding transcription activator activity;GO:0000981,DNA-binding transcription factor activity;GO:0003690,double-stranded DNA binding;GO:0019899,enzyme binding;GO:0035035,histone acetyltransferase binding;GO:0030544,Hsp70 pro…	GO:0007568,aging;GO:0007409,axonogenesis;GO:0071398,cellular response to fatty acid;GO:0071363,cellular response to growth factor stimulus;GO:0035729,cellular response to hepatocyte growth factor stimulus;GO:1990314,cellular response to insulin-like growth factor stimulus;GO:1990830,cellular response to leukemia inhibitory factor;GO:1990090,cellular response to nerve growth factor stimulus;GO:003…	mmu:12912,path:mmu04668,TNF signaling pathway;mmu:12912,path:mmu04024,cAMP signaling pathway;mmu:12912,path:mmu04022,cGMP-PKG signaling pathway;mmu:12912,path:mmu04151,PI3K-Akt signaling pathway;mmu:12912,path:mmu04152,AMPK signaling pathway;mmu:12912,path:mmu04612,Antigen processing and presentation;mmu:12912,path:mmu04911,Insulin secretion;mmu:12912,path:mmu04922,Glucagon signaling pathway;mmu:…
DCUP_MOUSE	P70697	Urod	Uroporphyrinogen decarboxylase	247	233.8	292.8	269.2	244.3	267.2	227.5	268.7	234.9	257.867	260.233	243.7	257.867	260.233	243.7	1.00918	0.909625	0	0.945062	0.553276	0	0.936467	0.331859	0	GO:0005829,cytosol;GO:0005654,nucleoplasm	GO:0004853,uroporphyrinogen decarboxylase activity;GO:0008198,ferrous iron binding	GO:0006779,porphyrin-containing compound biosynthetic process;GO:0006783,heme biosynthetic process;GO:0042168,heme metabolic process;GO:0006782,protoporphyrinogen IX biosynthetic process;GO:0046502,uroporphyrinogen III metabolic process	mmu:22275,path:mmu00860,Porphyrin and chlorophyll metabolism
NDUB1_MOUSE	P0DN34	Ndufb1	NADH dehydrogenase [ubiquinone] 1 beta subcomplex subunit 1	0	0	0	0	0	0	516.4	514.6	481.2	180.054	146.944	504.067			504.067	0.816106	0.522947	0	2.79952	0.000105	1	3.43034	0.001409	1	GO:0016021,integral component of membrane;GO:0005747,mitochondrial respiratory chain complex I;GO:0005739,mitochondrion;GO:0016607,nuclear speck	GO:0003954,NADH dehydrogenase activity	GO:0032981,mitochondrial respiratory chain complex I assembly
RIFK_MOUSE	Q8CFV9	Rfk	Riboflavin kinase	0	0	0	0	0	0	359.6	404.5	352.6	333.97	204.308	372.233			372.233	0.611755	0.078499	0	1.11457	0.473245	0	1.82192	0.00875	1	GO:0005739,mitochondrion	GO:0005524,ATP binding;GO:0046872,metal ion binding;GO:0008531,riboflavin kinase activity	GO:0006915,apoptotic process;GO:0009398,FMN biosynthetic process;GO:0033864,positive regulation of NAD(P)H oxidase activity;GO:0072593,reactive oxygen species metabolic process;GO:0009231,riboflavin biosynthetic process;GO:0006771,riboflavin metabolic process	mmu:54391,path:mmu00740,Riboflavin metabolism
ARL15_MOUSE	Q8BGR6	Arl15	ADP-ribosylation factor-like protein 15	0	0	0	0	1023.4	1173.8	1062.4	877	950.1	226.358	801.437	963.167		1098.6	963.167	3.54057	0.12863	0	4.25505	0.000213	1	1.2018	0.624134	0		GO:0005525,GTP binding
LMAN2_MOUSE	Q9DBH5	Lman2	Vesicular integral-membrane protein VIP36	376	357.8	428.7	405.1	355	368.1	315	373.5	347.9	387.5	376.067	345.467	387.5	376.067	345.467	0.970495	0.683054	0	0.891527	0.196861	0	0.918631	0.24755	0	GO:0009986,cell surface;GO:0030134,COPII-coated ER to Golgi transport vesicle;GO:0005789,endoplasmic reticulum membrane;GO:0005793,endoplasmic reticulum-Golgi intermediate compartment;GO:0005615,extracellular space;GO:0005794,Golgi apparatus;GO:0000139,Golgi membrane;GO:0005887,integral component of plasma membrane	GO:0030246,carbohydrate binding;GO:0031072,heat shock protein binding;GO:0005537,mannose binding;GO:0046872,metal ion binding	GO:0007029,endoplasmic reticulum organization;GO:0006888,endoplasmic reticulum to Golgi vesicle-mediated transport;GO:0007030,Golgi organization;GO:0050766,positive regulation of phagocytosis;GO:0015031,protein transport;GO:0006890,retrograde vesicle-mediated transport	mmu:66890,path:mmu04141,Protein processing in endoplasmic reticulum
RM11_MOUSE	Q9CQF0	Mrpl11	39S ribosomal protein L11, mitochondrial	340.5	360.3	384.7	418.5	377.2	374.2	312.3	403.5	372.8	361.833	389.967	362.867	361.833	389.967	362.867	1.07775	0.216223	0	1.00286	0.973899	0	0.930507	0.422587	0	GO:0005840,ribosome;GO:0015934,large ribosomal subunit;GO:0005762,mitochondrial large ribosomal subunit;GO:0005739,mitochondrion	GO:0003735,structural constituent of ribosome;GO:0070180,large ribosomal subunit rRNA binding;GO:0019843,rRNA binding	GO:0006412,translation;GO:0000027,ribosomal large subunit assembly	mmu:66419,path:mmu03010,Ribosome
ZWINT_MOUSE	Q9CQU5	Zwint	ZW10 interactor	233.4	221.4	254.5	252	242.8	228.4	207.8	235.7	221	236.433	241.067	221.5	236.433	241.067	221.5	1.0196	0.716057	0	0.936839	0.301243	0	0.918833	0.138294	0	GO:0000776,kinetochore;GO:0000777,condensed chromosome kinetochore;GO:0005737,cytoplasm;GO:0005829,cytosol;GO:0030425,dendrite;GO:0043231,intracellular membrane-bounded organelle;GO:0043005,neuron projection;GO:0016604,nuclear body;GO:0005654,nucleoplasm;GO:0005634,nucleus	GO:0047485,protein N-terminus binding	GO:0007093,mitotic cell cycle checkpoint;GO:0051301,cell division;GO:0051649,establishment of localization in cell;GO:0000070,mitotic sister chromatid segregation
MIEN1_MOUSE	Q9CQ86	Mien1	Migration and invasion enhancer 1	0	0	0	0	0	0	258.5	302.5	275.2	269.7	220.966	278.733			278.733	0.819304	0.647507	0	1.0335	0.863661	0	1.26143	0.544899	0	GO:0005829,cytosol;GO:0031235,intrinsic component of the cytoplasmic side of the plasma membrane		GO:0006915,apoptotic process;GO:0043066,negative regulation of apoptotic process;GO:0030335,positive regulation of cell migration;GO:0051491,positive regulation of filopodium assembly
D3YY98_MOUSE	D3YY98	Stx18	Syntaxin-18 (Fragment)	457	470.4	409.4	437.6	470.4	403	415.5	426.3	446	445.6	437	429.267	445.6	437	429.267	0.9807	0.764824	0	0.963345	0.471215	0	0.982304	0.736214	0	GO:0005783,endoplasmic reticulum;GO:0005789,endoplasmic reticulum membrane;GO:0000139,Golgi membrane;GO:0016021,integral component of membrane;GO:0031201,SNARE complex;GO:0016020,membrane	GO:0019904,protein domain specific binding;GO:0005484,SNAP receptor activity	GO:0090158,endoplasmic reticulum membrane organization;GO:0006886,intracellular protein transport;GO:1902953,positive regulation of ER to Golgi vesicle-mediated transport;GO:1902117,positive regulation of organelle assembly;GO:1903358,regulation of Golgi organization;GO:0006890,retrograde vesicle-mediated transport	mmu:71116,path:mmu04130,SNARE interactions in vesicular transport;mmu:71116,path:mmu04145,Phagosome
NOP56_MOUSE	Q9D6Z1	Nop56	Nucleolar protein 56	297.6	292.3	318.1	266.4	285.1	304.6	252.6	288.9	291.7	302.667	285.367	277.733	302.667	285.367	277.733	0.942841	0.270669	0	0.917621	0.168405	0	0.973251	0.672036	0	GO:0031428,box C/D snoRNP complex;GO:0005737,cytoplasm;GO:0001650,fibrillar center;GO:0005654,nucleoplasm;GO:0070761,pre-snoRNP complex;GO:0005732,small nucleolar ribonucleoprotein complex;GO:0032040,small-subunit processome	GO:1990226,histone methyltransferase binding;GO:0030515,snoRNA binding	GO:0042254,ribosome biogenesis	mmu:67134,path:mmu03008,Ribosome biogenesis in eukaryotes;mmu:67134,path:mmu05017,Spinocerebellar ataxia
RPP30_MOUSE	O88796	Rpp30	Ribonuclease P protein subunit p30	87.2	98.3	98.6	96.5	96.5	90.5	88.1	115.2	102.7	94.7	94.5	102	94.7	94.5	102	0.997888	0.964729	0	1.07709	0.447819	0	1.07936	0.405956	0	GO:0030681,multimeric ribonuclease P complex;GO:0005655,nucleolar ribonuclease P complex;GO:0000172,ribonuclease MRP complex	GO:0004526,ribonuclease P activity;GO:0033204,ribonuclease P RNA binding;GO:0003723,RNA binding	GO:0090502,RNA phosphodiester bond hydrolysis;GO:0006364,rRNA processing;GO:0001682,tRNA 5'-leader removal;GO:0008033,tRNA processing	mmu:54364,path:mmu03013,RNA transport;mmu:54364,path:mmu03008,Ribosome biogenesis in eukaryotes
SRSF9_MOUSE	Q9D0B0	Srsf9	Serine/arginine-rich splicing factor 9	225.9	253	254.2	270.1	242.5	228.3	197.1	255.6	236.3	244.367	246.967	229.667	244.367	246.967	229.667	1.01064	0.873809	0	0.939844	0.493585	0	0.92995	0.459048	0	GO:0016607,nuclear speck;GO:0005730,nucleolus;GO:0005654,nucleoplasm;GO:0005634,nucleus	GO:0019904,protein domain specific binding;GO:0003723,RNA binding;GO:0003676,nucleic acid binding	GO:0045292,mRNA cis splicing;GO:0048025,negative regulation of mRNA splicing;GO:0000381,regulation of alternative mRNA splicing;GO:0043279,response to alkaloid;GO:0009636,response to toxic substance	mmu:108014,path:mmu03040,Spliceosome;mmu:108014,path:mmu05168,Herpes simplex virus 1 infection
K22O_MOUSE	Q3UV17	Krt76	Keratin, type II cytoskeletal 2 oral	0	0	0	0	261.2	737.7	271.4	230.3	393.1	161.589	404.977	298.267		499.45	298.267	2.50621	0.220662	0	1.84583	0.058685	0	0.736503	0.572604	0	GO:0045095,keratin filament		GO:0008544,epidermis development;GO:0043473,pigmentation;GO:0048733,sebaceous gland development
PLTP_MOUSE	P55065	Pltp	Phospholipid transfer protein	184	193.9	186	188.2	183.9	192	149.3	190.6	181	187.967	188.033	173.633	187.967	188.033	173.633	1.00036	0.986919	0	0.923745	0.326792	0	0.923418	0.32006	0	GO:0005615,extracellular space;GO:0005576,extracellular region;GO:0034364,high-density lipoprotein particle;GO:0005634,nucleus	GO:0008289,lipid binding;GO:0097001,ceramide binding;GO:0120017,ceramide transfer activity;GO:0140340,cerebroside transfer activity;GO:0120020,cholesterol transfer activity;GO:0140337,diacylglyceride transfer activity;GO:0019992,diacylglycerol binding;GO:0008035,high-density lipoprotein particle binding;GO:0030169,low-density lipoprotein particle binding;GO:0070300,phosphatidic acid binding;GO:19…	GO:0006629,lipid metabolic process;GO:0035627,ceramide transport;GO:0030317,flagellated sperm motility;GO:0046836,glycolipid transport;GO:0034375,high-density lipoprotein particle remodeling;GO:0006869,lipid transport;GO:0015914,phospholipid transport;GO:0010875,positive regulation of cholesterol efflux;GO:0010189,vitamin E biosynthetic process	mmu:18830,path:mmu03320,PPAR signaling pathway;mmu:18830,path:mmu04979,Cholesterol metabolism
ACSL4_MOUSE	Q9QUJ7	Acsl4	Long-chain-fatty-acid--CoA ligase 4	104.7	96.4	107.9	117.2	106.7	122.3	110.8	107.5	678.6	103	115.4	298.967	103	115.4	298.967	1.12039	0.096452	0	2.90259	0.360291	0	2.5907	0.388402	0	GO:0005737,cytoplasm;GO:0005783,endoplasmic reticulum;GO:0005789,endoplasmic reticulum membrane;GO:0016021,integral component of membrane;GO:0005811,lipid droplet;GO:0016020,membrane;GO:0044233,mitochondria-associated endoplasmic reticulum membrane;GO:0031966,mitochondrial membrane;GO:0005741,mitochondrial outer membrane;GO:0005739,mitochondrion;GO:0043025,neuronal cell body;GO:0005778,peroxisoma…	GO:0003996,acyl-CoA ligase activity;GO:0047676,arachidonate-CoA ligase activity;GO:0005524,ATP binding;GO:0102391,decanoate-CoA ligase activity;GO:0004467,long-chain fatty acid-CoA ligase activity;GO:0031957,very long-chain fatty acid-CoA ligase activity	GO:0060996,dendritic spine development;GO:0060136,embryonic process involved in female pregnancy;GO:0006631,fatty acid metabolic process;GO:0015908,fatty acid transport;GO:0008610,lipid biosynthetic process;GO:0006629,lipid metabolic process;GO:0001676,long-chain fatty acid metabolic process;GO:0035338,long-chain fatty-acyl-CoA biosynthetic process;GO:0035336,long-chain fatty-acyl-CoA metabolic p…	mmu:50790,path:mmu00061,Fatty acid biosynthesis;mmu:50790,path:mmu00071,Fatty acid degradation;mmu:50790,path:mmu04146,Peroxisome;mmu:50790,path:mmu04216,Ferroptosis;mmu:50790,path:mmu04920,Adipocytokine signaling pathway;mmu:50790,path:mmu03320,PPAR signaling pathway;mmu:50790,path:mmu04714,Thermogenesis
A0A338P699_MOUSE	A0A338P699	Kng2	Kininogen 2 (Fragment)	210.8	198.8	255.5	252.6	215.5	223.4	151.6	271.6	188.3	221.7	230.5	203.833	221.7	230.5	203.833	1.03969	0.691423	0	0.919411	0.67426	0	0.884309	0.513641	0	GO:0005576,extracellular region;GO:0005615,extracellular space;GO:0062023,collagen-containing extracellular matrix	GO:0004869,cysteine-type endopeptidase inhibitor activity;GO:0004866,endopeptidase inhibitor activity;GO:0005102,signaling receptor binding	GO:0030195,negative regulation of blood coagulation;GO:0010951,negative regulation of endopeptidase activity;GO:0007204,positive regulation of cytosolic calcium ion concentration	mmu:385643,path:mmu04071,Sphingolipid signaling pathway;mmu:385643,path:mmu04022,cGMP-PKG signaling pathway;mmu:385643,path:mmu04080,Neuroactive ligand-receptor interaction;mmu:385643,path:mmu04810,Regulation of actin cytoskeleton;mmu:385643,path:mmu04610,Complement and coagulation cascades;mmu:385643,path:mmu04750,Inflammatory mediator regulation of TRP channels;mmu:385643,path:mmu05200,Pathways…
PGM2_MOUSE	Q7TSV4	Pgm2	Phosphoglucomutase-2	370.8	412.8	396.2	426.2	389.2	364.5	332.2	400.2	355.9	393.267	393.3	362.767	393.267	393.3	362.767	1.00008	0.998848	0	0.922444	0.261916	0	0.922366	0.318268	0	GO:0005737,cytoplasm	GO:0016868,intramolecular transferase activity;GO:0000287,magnesium ion binding;GO:0004614,phosphoglucomutase activity;GO:0008973,phosphopentomutase activity	GO:0005975,carbohydrate metabolic process;GO:0046386,deoxyribose phosphate catabolic process;GO:0006006,glucose metabolic process	mmu:66681,path:mmu00010,Glycolysis / Gluconeogenesis;mmu:66681,path:mmu00030,Pentose phosphate pathway;mmu:66681,path:mmu00052,Galactose metabolism;mmu:66681,path:mmu00500,Starch and sucrose metabolism;mmu:66681,path:mmu00520,Amino sugar and nucleotide sugar metabolism;mmu:66681,path:mmu00230,Purine metabolism
A0A1W2P6X3_MOUSE	A0A1W2P6X3	Fmnl1	Formin-like protein 1	0	0	0	0	0	0	0	0	954.3	228.339	223.779	593.247			954.3	0.980027	0.692259	0	2.59809	0.114248	0	2.65104	0.111017	0	GO:0005829,cytosol;GO:0045335,phagocytic vesicle;GO:0005886,plasma membrane	GO:0003779,actin binding;GO:0017048,Rho GTPase binding;GO:0051015,actin filament binding;GO:0032794,GTPase activating protein binding;GO:0005522,profilin binding;GO:0048365,Rac GTPase binding	GO:0030036,actin cytoskeleton organization;GO:0008360,regulation of cell shape;GO:0007010,cytoskeleton organization;GO:0051014,actin filament severing;GO:0016477,cell migration;GO:0009987,cellular process;GO:0030866,cortical actin cytoskeleton organization;GO:0006929,substrate-dependent cell migration
HYKK_MOUSE	Q5U5V2	Hykk	Hydroxylysine kinase	125.9	149.2	137.8	152.6	144.8	125.2	135.1	149.6	121.9	137.633	140.867	135.533	137.633	140.867	135.533	1.02349	0.774898	0	0.984742	0.850559	0	0.962139	0.664795	0	GO:0005737,cytoplasm	GO:0019202,amino acid kinase activity;GO:0047992,hydroxylysine kinase activity		mmu:235386,path:mmu00310,Lysine degradation
CPNE4_MOUSE	Q8BLR2	Cpne4	Copine-4	163.9	144.5	164.5	150.1	148.2	179.6	1007	1107.8	1005.9	157.633	159.3	1040.23	157.633	159.3	1040.23	1.01057	0.897123	0	6.59907	1.4e-05	1	6.53003	1.5e-05	1	GO:0005886,plasma membrane	GO:0005544,calcium-dependent phospholipid binding;GO:0046872,metal ion binding	GO:0071277,cellular response to calcium ion
H3BK66_MOUSE	H3BK66	Wdr37	WD repeat-containing protein 37 (Fragment)	387.5	349.6	322.3	328.2	394.3	434.9	355.6	310.9	312.8	353.133	385.8	326.433	353.133	385.8	326.433	1.09251	0.420094	0	0.924391	0.326178	0	0.846121	0.158981	0	GO:0005737,cytoplasm;GO:0005634,nucleus;GO:0030687,preribosome
WDR41_MOUSE	Q3UDP0	Wdr41	WD repeat-containing protein 41	464.6	496.4	501.5	545.5	1113.1	1130.8	995.9	1108.2	995.4	487.5	929.8	1033.17	487.5	929.8	1033.17	1.90728	0.083223	0	2.11932	0.000155	1	1.11117	0.625561	0	GO:1990316,Atg1/ULK1 kinase complex;GO:0005737,cytoplasm;GO:0032045,guanyl-nucleotide exchange factor complex;GO:0016021,integral component of membrane	GO:0017112,Rab guanyl-nucleotide exchange factor activity	GO:0006914,autophagy;GO:0010506,regulation of autophagy	mmu:218460,path:mmu04140,Autophagy - animal
TM9S3_MOUSE	Q9ET30	Tm9sf3	Transmembrane 9 superfamily member 3	275.5	679.3	294.3	686	632.4	688.9	638	670.2	610.7	416.367	669.1	639.633	416.367	669.1	639.633	1.607	0.129889	0	1.53623	0.167757	0	0.955961	0.306564	0	GO:0016021,integral component of membrane;GO:0016020,membrane		GO:0072657,protein localization to membrane
NDUF5_MOUSE	A2APY7	Ndufaf5	Arginine-hydroxylase NDUFAF5, mitochondrial	0	0	0	0	0	0	0	0	319.8	225.311	239.415	174.581			319.8	1.0626	0.907296	0	0.774846	0.655626	0	0.729197	0.591716	0	GO:0031314,extrinsic component of mitochondrial inner membrane;GO:0005739,mitochondrion	GO:0008168,methyltransferase activity;GO:0016491,oxidoreductase activity	GO:0032259,methylation;GO:0032981,mitochondrial respiratory chain complex I assembly;GO:0030961,peptidyl-arginine hydroxylation	mmu:69487,path:mmu04714,Thermogenesis
E9PUK3_MOUSE	E9PUK3	Fnbp1l	Formin-binding protein 1-like	113.2	112.8	93.9	132.6	109.7	95.1	105.2	122.4	97.8	106.633	112.467	108.467	106.633	112.467	108.467	1.05471	0.668307	0	1.01719	0.858964	0	0.964434	0.775704	0	GO:0031410,cytoplasmic vesicle;GO:0005829,cytosol;GO:0005938,cell cortex;GO:0005737,cytoplasm;GO:0005856,cytoskeleton;GO:0005886,plasma membrane	GO:0051020,GTPase binding;GO:0008289,lipid binding	GO:0006897,endocytosis;GO:0060271,cilium assembly;GO:0072583,clathrin-dependent endocytosis;GO:0010324,membrane invagination;GO:0097320,plasma membrane tubulation;GO:0051491,positive regulation of filopodium assembly;GO:0006900,vesicle budding from membrane;GO:0030050,vesicle transport along actin filament;GO:0006914,autophagy
GA2L1_MOUSE	Q8JZP9	Gas2l1	GAS2-like protein 1	0	538.3	0	593.2	524.2	511	443.1	538.7	477	308.455	542.8	486.267	538.3	542.8	486.267	1.75974	0.117578	0	1.57646	0.207507	0	0.895849	0.209578	0	GO:0005856,cytoskeleton;GO:0005884,actin filament;GO:0005737,cytoplasm	GO:0008093,cytoskeletal anchor activity;GO:0008017,microtubule binding;GO:0051015,actin filament binding;GO:0046966,thyroid hormone receptor binding	GO:0051764,actin crosslink formation;GO:0007050,cell cycle arrest;GO:0009267,cellular response to starvation;GO:0097067,cellular response to thyroid hormone stimulus;GO:0001578,microtubule bundle formation;GO:0000226,microtubule cytoskeleton organization;GO:0030308,negative regulation of cell growth;GO:0045647,negative regulation of erythrocyte differentiation;GO:0010629,negative regulation of ge…
OTUL_MOUSE	Q3UCV8	Otulin	Ubiquitin thioesterase otulin	149	163.6	154.6	162.4	153	163.3	135.4	158.8	130.3	155.733	159.567	141.5	155.733	159.567	141.5	1.02462	0.51542	0	0.908604	0.218137	0	0.886777	0.12615	0	GO:0005737,cytoplasm	GO:0004843,thiol-dependent ubiquitin-specific protease activity;GO:0008234,cysteine-type peptidase activity	GO:1990108,protein linear deubiquitination;GO:0045087,innate immune response;GO:0050728,negative regulation of inflammatory response;GO:0032088,negative regulation of NF-kappaB transcription factor activity;GO:0070431,nucleotide-binding oligomerization domain containing 2 signaling pathway;GO:0060828,regulation of canonical Wnt signaling pathway;GO:0010803,regulation of tumor necrosis factor-medi…
F177A_MOUSE	Q8BR63	Fam177a1	Protein FAM177A1	0	0	0	0	0	0	839.9	977	799.8	138.806	122.879	872.233			872.233	0.885261	0.29509	0	6.28384	0.000186	1	7.09829	0.000153	1
NDUF3_MOUSE	Q9JKL4	Ndufaf3	NADH dehydrogenase [ubiquinone] 1 alpha subcomplex assembly factor 3	158.1	173.5	182.4	207.6	866.5	895.9	824.6	880.6	827.5	171.333	656.667	844.233	171.333	656.667	844.233	3.83269	0.097009	0	4.92743	4e-06	1	1.28564	0.452175	0	GO:0005743,mitochondrial inner membrane;GO:0005739,mitochondrion;GO:0005634,nucleus		GO:0032981,mitochondrial respiratory chain complex I assembly	mmu:66706,path:mmu04714,Thermogenesis
NAT14_MOUSE	Q8BVG8	Nat14	N-acetyltransferase 14	220.1	212.7	219.7	193.6	184.9	179.6	166.8	187.9	177.2	217.5	186.033	177.3	217.5	186.033	177.3	0.855326	0.002663	0	0.815172	0.003569	-1	0.953055	0.29945	0	GO:0016021,integral component of membrane	GO:0008080,N-acetyltransferase activity;GO:0003677,DNA binding
TINAL_MOUSE	Q99JR5	Tinagl1	Tubulointerstitial nephritis antigen-like	196.4	154.3	197.3	158.8	186	170.3	151.6	177.2	141.3	182.667	171.7	156.7	182.667	171.7	156.7	0.939964	0.536254	0	0.857847	0.217365	0	0.912638	0.321452	0	GO:0062023,collagen-containing extracellular matrix;GO:0005737,cytoplasm;GO:0005615,extracellular space;GO:0005764,lysosome	GO:0008234,cysteine-type peptidase activity;GO:0043236,laminin binding
NUDC1_MOUSE	Q6PIP5	Nudcd1	NudC domain-containing protein 1	640.7	672.4	628.6	751.1	639.9	752.9	629.3	700.1	545.4	647.233	714.633	624.933	647.233	714.633	624.933	1.10414	0.163854	0	0.965546	0.65711	0	0.874481	0.19856	0	GO:0005829,cytosol;GO:0005654,nucleoplasm
RHBT2_MOUSE	Q91V93	Rhobtb2	Rho-related BTB domain-containing protein 2	274.6	177.7	194.1	208	150.9	192.6	195.4	231.6	167.2	215.467	183.833	198.067	215.467	183.833	198.067	0.853187	0.41058	0	0.919245	0.647635	0	1.07743	0.603267	0	GO:0005737,cytoplasm	GO:0005525,GTP binding;GO:0003924,GTPase activity	GO:0007264,small GTPase mediated signal transduction	mmu:246710,path:mmu04120,Ubiquitin mediated proteolysis
P66B_MOUSE	Q8VHR5	Gatad2b	Transcriptional repressor p66-beta	795.6	990.2	846	803.7	801.1	779	704.7	776.6	746	877.267	794.6	742.433	877.267	794.6	742.433	0.905768	0.232705	0	0.846303	0.095007	0	0.934349	0.079049	0	GO:0016607,nuclear speck;GO:0005654,nucleoplasm;GO:0016581,NuRD complex	GO:0043565,sequence-specific DNA binding;GO:0008270,zinc ion binding	GO:0000122,negative regulation of transcription by RNA polymerase II
STX4_MOUSE	P70452	Stx4	Syntaxin-4	305.7	307.1	315.8	304.5	291.4	319.3	258.1	291.5	250.6	309.533	305.067	266.733	309.533	305.067	266.733	0.98557	0.633059	0	0.861727	0.029879	0	0.874344	0.06217	0	GO:0016324,apical plasma membrane;GO:0016323,basolateral plasma membrane;GO:0009986,cell surface;GO:0005737,cytoplasm;GO:0043197,dendritic spine;GO:0012505,endomembrane system;GO:0005768,endosome;GO:0005615,extracellular space;GO:0098978,glutamatergic synapse;GO:0016021,integral component of membrane;GO:0030027,lamellipodium;GO:0043219,lateral loop;GO:0016020,membrane;GO:0035749,myelin sheath ada…	GO:0017137,Rab GTPase binding;GO:0005484,SNAP receptor activity;GO:0000149,SNARE binding;GO:0030507,spectrin binding;GO:0016230,sphingomyelin phosphodiesterase activator activity	GO:0071346,cellular response to interferon-gamma;GO:0034599,cellular response to oxidative stress;GO:1903575,cornified envelope assembly;GO:0098967,exocytic insertion of neurotransmitter receptor to postsynaptic membrane;GO:0006887,exocytosis;GO:0006886,intracellular protein transport;GO:0060291,long-term synaptic potentiation;GO:0061025,membrane fusion;GO:0048284,organelle fusion;GO:0043085,posi…	mmu:20909,path:mmu04130,SNARE interactions in vesicular transport;mmu:20909,path:mmu04962,Vasopressin-regulated water reabsorption
CYRIA_MOUSE	Q8BHZ0	Cyria	CYFIP-related Rac1 interactor A	0	531.9	0	557.1	494.6	563.2	447.3	512.7	417.1	341.03	538.3	459.033	531.9	538.3	459.033	1.57845	0.114662	0	1.34602	0.302063	0	0.852746	0.090758	0	GO:0016020,membrane	GO:0048365,Rac GTPase binding	GO:0030833,regulation of actin filament polymerization
MTX2_MOUSE	O88441	Mtx2	Metaxin-2	555.5	605.2	604.2	573.3	598	641.2	520.2	560.2	498.1	588.3	604.167	526.167	588.3	604.167	526.167	1.02697	0.571026	0	0.894385	0.064114	0	0.870897	0.044167	0	GO:0005739,mitochondrion;GO:0005730,nucleolus;GO:0001401,SAM complex		GO:0015031,protein transport
2ABD_MOUSE	Q925E7	Ppp2r2d	Serine/threonine-protein phosphatase 2A 55 kDa regulatory subunit B delta isoform	0	0	0	0	0	0	0	0	704.9	196.899	167.07	354.348			704.9	0.848507	0.537047	0	1.79964	0.431043	0	2.12095	0.348219	0	GO:0000159,protein phosphatase type 2A complex;GO:0005829,cytosol	GO:0019888,protein phosphatase regulator activity	GO:0051301,cell division;GO:0010458,exit from mitosis;GO:0000278,mitotic cell cycle;GO:0070262,peptidyl-serine dephosphorylation	mmu:52432,path:mmu03015,mRNA surveillance pathway;mmu:52432,path:mmu04390,Hippo signaling pathway;mmu:52432,path:mmu04071,Sphingolipid signaling pathway;mmu:52432,path:mmu04151,PI3K-Akt signaling pathway;mmu:52432,path:mmu04152,AMPK signaling pathway;mmu:52432,path:mmu04530,Tight junction;mmu:52432,path:mmu04261,Adrenergic signaling in cardiomyocytes;mmu:52432,path:mmu04728,Dopaminergic synapse;m…
RM50_MOUSE	Q8VDT9	Mrpl50	39S ribosomal protein L50, mitochondrial	110.2	104.2	136.7	121.3	106.5	105.5	98.8	111.9	110.8	117.033	111.1	107.167	117.033	111.1	107.167	0.949302	0.624782	0	0.915694	0.413818	0	0.964596	0.583844	0	GO:0005762,mitochondrial large ribosomal subunit;GO:0005739,mitochondrion
DJC10_MOUSE	Q9DC23	Dnajc10	DnaJ homolog subfamily C member 10	0	238.9	0	268.1	239.2	226.8	224.2	260.1	259	197.699	244.7	247.767	238.9	244.7	247.767	1.23774	0.126356	0	1.25325	0.10714	0	1.01253	0.865535	0	GO:0005783,endoplasmic reticulum;GO:0034663,endoplasmic reticulum chaperone complex;GO:0005788,endoplasmic reticulum lumen	GO:0001671,ATPase activator activity;GO:0051117,ATPase binding;GO:0051087,chaperone binding;GO:0015036,disulfide oxidoreductase activity;GO:0030544,Hsp70 protein binding;GO:0051787,misfolded protein binding;GO:0016671,oxidoreductase activity;GO:0015035,protein disulfide oxidoreductase activity	GO:0045454,cell redox homeostasis;GO:0070059,intrinsic apoptotic signaling pathway in response to endoplasmic reticulum stress;GO:0001933,negative regulation of protein phosphorylation;GO:0032781,positive regulation of ATPase activity;GO:0034975,protein folding in endoplasmic reticulum;GO:0034976,response to endoplasmic reticulum stress;GO:0030433,ubiquitin-dependent ERAD pathway	mmu:66861,path:mmu04141,Protein processing in endoplasmic reticulum
A0A0G2JDP0_MOUSE	A0A0G2JDP0	Hax1	HCLS1-associated protein X-1	227.3	231.9	225.6	241.2	244	224.8	211.8	228.4	214.1	228.267	236.667	218.1	228.267	236.667	218.1	1.0368	0.251822	0	0.955461	0.139476	0	0.921549	0.079161	0	GO:0031410,cytoplasmic vesicle;GO:0005739,mitochondrion;GO:0031965,nuclear membrane;GO:0016529,sarcoplasmic reticulum;GO:0015629,actin cytoskeleton;GO:0016324,apical plasma membrane;GO:0005938,cell cortex;GO:0030136,clathrin-coated vesicle;GO:0005737,cytoplasm;GO:0005783,endoplasmic reticulum;GO:0043231,intracellular membrane-bounded organelle;GO:0030027,lamellipodium;GO:0005758,mitochondrial int…	GO:0019966,interleukin-1 binding;GO:0019904,protein domain specific binding;GO:0047485,protein N-terminus binding	GO:0043066,negative regulation of apoptotic process;GO:0007166,cell surface receptor signaling pathway;GO:0071345,cellular response to cytokine stimulus;GO:2000251,positive regulation of actin cytoskeleton reorganization;GO:0030854,positive regulation of granulocyte differentiation;GO:0033138,positive regulation of peptidyl-serine phosphorylation;GO:0050731,positive regulation of peptidyl-tyrosin…
SAC2_MOUSE	Q8CDA1	Inpp5f	Phosphatidylinositide phosphatase SAC2	536.5	594.7	645	621.4	558.4	606.1	1140.7	1287.4	1206.8	592.067	595.3	1211.63	592.067	595.3	1211.63	1.00546	0.933927	0	2.04645	0.0003	1	2.03533	0.000187	1	GO:0030424,axon;GO:0045334,clathrin-coated endocytic vesicle;GO:0005905,clathrin-coated pit;GO:0005737,cytoplasm;GO:0030425,dendrite;GO:0005769,early endosome;GO:0043231,intracellular membrane-bounded organelle;GO:0043025,neuronal cell body;GO:0055037,recycling endosome;GO:0016021,integral component of membrane	GO:0008934,inositol monophosphate 1-phosphatase activity;GO:0052832,inositol monophosphate 3-phosphatase activity;GO:0052833,inositol monophosphate 4-phosphatase activity;GO:0034596,phosphatidylinositol phosphate 4-phosphatase activity;GO:0034595,phosphatidylinositol phosphate 5-phosphatase activity;GO:0043812,phosphatidylinositol-4-phosphate phosphatase activity;GO:0042803,protein homodimerizati…	GO:0008344,adult locomotory behavior;GO:0014898,cardiac muscle hypertrophy in response to stress;GO:0072583,clathrin-dependent endocytosis;GO:0048681,negative regulation of axon regeneration;GO:0033137,negative regulation of peptidyl-serine phosphorylation;GO:0042532,negative regulation of tyrosine phosphorylation of STAT protein;GO:0031161,phosphatidylinositol catabolic process;GO:0046856,phosph…	mmu:101490,path:mmu00562,Inositol phosphate metabolism;mmu:101490,path:mmu04070,Phosphatidylinositol signaling system
VMA21_MOUSE	Q78T54	Vma21	Vacuolar ATPase assembly integral membrane protein Vma21	0	0	0	0	0	0	0	0	408.5	237.341	244.157	245.552			408.5	1.02872	0.829885	0	1.03459	0.926374	0	1.00571	0.987742	0	GO:0005789,endoplasmic reticulum membrane;GO:0033116,endoplasmic reticulum-Golgi intermediate compartment membrane;GO:0012507,ER to Golgi transport vesicle membrane;GO:0016021,integral component of membrane;GO:0005773,vacuole;GO:0005764,lysosome		GO:0070072,vacuolar proton-transporting V-type ATPase complex assembly
ARL10_MOUSE	Q9QXJ4	Arl10	ADP-ribosylation factor-like protein 10	533.7	566.5	660.1	689.3	547.4	602.6	502.5	653.2	538.4	586.767	613.1	564.7	586.767	613.1	564.7	1.04488	0.662856	0	0.962393	0.728061	0	0.921057	0.474683	0	GO:0016021,integral component of membrane	GO:0005525,GTP binding
SNR40_MOUSE	Q6PE01	Snrnp40	U5 small nuclear ribonucleoprotein 40 kDa protein	153.5	233.5	168.9	199.7	182.6	192.6	174.4	191.4	471.1	185.3	191.633	278.967	185.3	191.633	278.967	1.03418	0.812524	0	1.50549	0.3988	0	1.45573	0.415845	0	GO:0071013,catalytic step 2 spliceosome;GO:0005829,cytosol;GO:0016607,nuclear speck;GO:0071007,U2-type catalytic step 2 spliceosome		GO:0006397,mRNA processing;GO:0008380,RNA splicing	mmu:66585,path:mmu03040,Spliceosome
EHD4_MOUSE	Q9EQP2	Ehd4	EH domain-containing protein 4	0	0	0	0	0	0	0	0	235.2	125.676	173.046	287.035			235.2	1.37693	0.072513	0	2.28393	0.004741	1	1.65872	0.028446	1	GO:0005769,early endosome;GO:0031901,early endosome membrane;GO:0030139,endocytic vesicle;GO:0005783,endoplasmic reticulum;GO:0043231,intracellular membrane-bounded organelle;GO:0048471,perinuclear region of cytoplasm;GO:0005886,plasma membrane;GO:0055038,recycling endosome membrane	GO:0005524,ATP binding;GO:0005509,calcium ion binding;GO:0005525,GTP binding	GO:0071363,cellular response to growth factor stimulus;GO:0060271,cilium assembly;GO:0032456,endocytic recycling;GO:0006897,endocytosis;GO:0016197,endosomal transport;GO:0006907,pinocytosis;GO:0050731,positive regulation of peptidyl-tyrosine phosphorylation;GO:0051260,protein homooligomerization;GO:0072659,protein localization to plasma membrane;GO:0030100,regulation of endocytosis	mmu:98878,path:mmu04144,Endocytosis
GCSP_MOUSE	Q91W43	Gldc	Glycine dehydrogenase (decarboxylating), mitochondrial	0	0	0	0	0	0	0	0	126.7	202.268	278.81	245.959			126.7	1.37842	0.542646	0	1.21601	0.712076	0	0.882177	0.738895	0	GO:0005960,glycine cleavage complex;GO:0005739,mitochondrion;GO:0005654,nucleoplasm;GO:0005886,plasma membrane	GO:0019899,enzyme binding;GO:0016594,glycine binding;GO:0004375,glycine dehydrogenase (decarboxylating) activity;GO:0016829,lyase activity;GO:0042803,protein homodimerization activity;GO:0070280,pyridoxal binding;GO:0030170,pyridoxal phosphate binding	GO:1990830,cellular response to leukemia inhibitory factor;GO:0006546,glycine catabolic process;GO:0019464,glycine decarboxylation via glycine cleavage system;GO:0065003,protein-containing complex assembly;GO:1903442,response to lipoic acid;GO:0036255,response to methylamine	mmu:104174,path:mmu00630,Glyoxylate and dicarboxylate metabolism;mmu:104174,path:mmu00260,Glycine, serine and threonine metabolism
RB27A_MOUSE	Q9ERI2	Rab27a	Ras-related protein Rab-27A	195.6	203.4	201	212.2	195.3	202.7	158	184.5	184.6	200	203.4	175.7	200	203.4	175.7	1.017	0.563642	0	0.8785	0.056567	0	0.863815	0.051938	0	GO:0016324,apical plasma membrane;GO:0030425,dendrite;GO:0012505,endomembrane system;GO:0070382,exocytic vesicle;GO:0005794,Golgi apparatus;GO:0005770,late endosome;GO:0005764,lysosome;GO:0042470,melanosome;GO:0032585,multivesicular body membrane;GO:0001750,photoreceptor outer segment;GO:0030141,secretory granule;GO:0030667,secretory granule membrane;GO:0033093,Weibel-Palade body	GO:0019003,GDP binding;GO:0005525,GTP binding;GO:0003924,GTPase activity;GO:0031489,myosin V binding;GO:0019904,protein domain specific binding	GO:0019882,antigen processing and presentation;GO:0007596,blood coagulation;GO:0097278,complement-dependent cytotoxicity;GO:0043316,cytotoxic T cell degranulation;GO:0006887,exocytosis;GO:1990182,exosomal secretion;GO:0006886,intracellular protein transport;GO:0030318,melanocyte differentiation;GO:0032400,melanosome localization;GO:0032402,melanosome transport;GO:0036257,multivesicular body organ…
FGF13_MOUSE	P70377	Fgf13	Fibroblast growth factor 13	491.9	511.4	547.2	555.4	518.2	538	457.6	502.2	444.9	516.833	537.2	468.233	516.833	537.2	468.233	1.03941	0.3538	0	0.905966	0.110158	0	0.871618	0.027892	0	GO:0005576,extracellular region;GO:0030424,axon;GO:0005737,cytoplasm;GO:0005829,cytosol;GO:0030425,dendrite;GO:0030175,filopodium;GO:0030426,growth cone;GO:0014704,intercalated disc;GO:0016328,lateral plasma membrane;GO:0005874,microtubule;GO:0043005,neuron projection;GO:0005634,nucleus;GO:0005886,plasma membrane	GO:0008083,growth factor activity;GO:0048487,beta-tubulin binding;GO:0044325,ion channel binding;GO:0008017,microtubule binding;GO:0030295,protein kinase activator activity;GO:0017080,sodium channel regulator activity	GO:0021795,cerebral cortex cell migration;GO:0045200,establishment of neuroblast polarity;GO:0021766,hippocampus development;GO:1904862,inhibitory synapse assembly;GO:0007612,learning;GO:0000165,MAPK cascade;GO:0007613,memory;GO:0046785,microtubule polymerization;GO:0048671,negative regulation of collateral sprouting;GO:0007026,negative regulation of microtubule depolymerization;GO:0001764,neuron…
VP13A_MOUSE	Q5H8C4	Vps13a	Vacuolar protein sorting-associated protein 13A	1604.6	1693.3	1659.2	1860.1	1672.9	1726	1575.2	1590.4	1591.4	1652.37	1753	1585.67	1652.37	1753	1585.67	1.0609	0.176557	0	0.959634	0.064633	0	0.904545	0.040301	0	GO:0031045,dense core granule;GO:0005789,endoplasmic reticulum membrane;GO:0010008,endosome membrane;GO:0019898,extrinsic component of membrane;GO:0005794,Golgi apparatus;GO:0005811,lipid droplet;GO:0005765,lysosomal membrane;GO:0031966,mitochondrial membrane;GO:0005741,mitochondrial outer membrane;GO:0099013,neuronal dense core vesicle lumen;GO:0097225,sperm midpiece		GO:0006914,autophagy;GO:0030317,flagellated sperm motility;GO:0007626,locomotory behavior;GO:1905146,lysosomal protein catabolic process;GO:0007399,nervous system development;GO:0045053,protein retention in Golgi apparatus;GO:0006623,protein targeting to vacuole;GO:0035176,social behavior;GO:0030382,sperm mitochondrion organization
D3Z2V1_MOUSE	D3Z2V1	Dcaf11	DDB1- and CUL4-associated factor 11 (Fragment)	545.6	515.3	578.6	556.5	521.1	502.8	461.5	536	498	546.5	526.8	498.5	546.5	526.8	498.5	0.963952	0.460196	0	0.912168	0.164244	0	0.946279	0.348374	0	GO:0080008,Cul4-RING E3 ubiquitin ligase complex;GO:0005654,nucleoplasm		GO:0043161,proteasome-mediated ubiquitin-dependent protein catabolic process;GO:0016567,protein ubiquitination
TYB10_MOUSE	Q6ZWY8	Tmsb10	Thymosin beta-10	2586.5	2433.7	2483.6	1434.5	3752.2	804.3	2446.4	836.1	2688.2	2501.27	1997	1990.23	2501.27	1997	1990.23	0.798395	0.604159	0	0.79569	0.430223	0	0.996612	0.995249	0	GO:0005737,cytoplasm;GO:0005856,cytoskeleton	GO:0003785,actin monomer binding	GO:0030036,actin cytoskeleton organization;GO:0007015,actin filament organization;GO:0030334,regulation of cell migration;GO:0042989,sequestering of actin monomers
RGS10_MOUSE	Q9CQE5	Rgs10	Regulator of G-protein signaling 10	366.9	323.3	360.1	355.9	316.8	308.4	285.5	286.3	255.2	350.1	327.033	275.667	350.1	327.033	275.667	0.934114	0.311738	0	0.787394	0.011832	-1	0.842931	0.045191	0	GO:0043679,axon terminus;GO:0005829,cytosol;GO:0043197,dendritic spine;GO:0043025,neuronal cell body;GO:0005634,nucleus	GO:0001965,G-protein alpha-subunit binding;GO:0005096,GTPase activator activity	GO:0007213,G protein-coupled acetylcholine receptor signaling pathway;GO:0009968,negative regulation of signal transduction;GO:0043547,positive regulation of GTPase activity;GO:0008277,regulation of G protein-coupled receptor signaling pathway;GO:0001975,response to amphetamine
ADNP_MOUSE	Q9Z103	Adnp	Activity-dependent neuroprotector homeobox protein	153.3	151.1	172.4	171.1	164.6	154.6	142.2	167.9	161.5	158.933	163.433	157.2	158.933	163.433	157.2	1.02831	0.616194	0	0.989094	0.874123	0	0.96186	0.530707	0	GO:0030424,axon;GO:0005737,cytoplasm;GO:0030425,dendrite;GO:0005615,extracellular space;GO:0043025,neuronal cell body;GO:0005634,nucleus	GO:0048487,beta-tubulin binding;GO:0003682,chromatin binding;GO:0005507,copper ion binding;GO:0003677,DNA binding;GO:0042277,peptide binding	GO:0032147,activation of protein kinase activity;GO:0031668,cellular response to extracellular stimulus;GO:0019934,cGMP-mediated signaling;GO:0044849,estrous cycle;GO:0010629,negative regulation of gene expression;GO:0043524,negative regulation of neuron apoptotic process;GO:0032091,negative regulation of protein binding;GO:0050805,negative regulation of synaptic transmission;GO:0033484,nitric ox…
RPB2_MOUSE	Q8CFI7	Polr2b	DNA-directed RNA polymerase II subunit RPB2	592	631.4	630	677.3	610.4	609.8	538.7	595.2	543.2	617.8	632.5	559.033	617.8	632.5	559.033	1.02379	0.600027	0	0.904878	0.057541	0	0.883847	0.063351	0	GO:0000784,nuclear chromosome;GO:0005654,nucleoplasm;GO:0005634,nucleus;GO:0005665,RNA polymerase II	GO:0003682,chromatin binding;GO:0003677,DNA binding;GO:0003899,DNA-directed 5'-3' RNA polymerase activity;GO:0046872,metal ion binding;GO:0032549,ribonucleoside binding	GO:0006366,transcription by RNA polymerase II	mmu:231329,path:mmu03020,RNA polymerase;mmu:231329,path:mmu05016,Huntington disease
CAD10_MOUSE	P70408	Cdh10	Cadherin-10	732.5	792.9	813.5	790.9	736.4	875.8	1260.8	1289.2	1182.1	779.633	801.033	1244.03	779.633	801.033	1244.03	1.02745	0.674309	0	1.59566	0.000321	1	1.55304	0.001017	1	GO:0016021,integral component of membrane;GO:0005886,plasma membrane;GO:0005912,adherens junction;GO:0016342,catenin complex;GO:0098982,GABA-ergic synapse;GO:0098978,glutamatergic synapse;GO:0099060,integral component of postsynaptic specialization membrane;GO:0099059,integral component of presynaptic active zone membrane	GO:0005509,calcium ion binding;GO:0045296,cadherin binding	GO:0007156,homophilic cell adhesion via plasma membrane adhesion molecules;GO:0034332,adherens junction organization;GO:0016339,calcium-dependent cell-cell adhesion via plasma membrane cell adhesion molecules;GO:0000902,cell morphogenesis;GO:0044331,cell-cell adhesion mediated by cadherin;GO:0098742,cell-cell adhesion via plasma-membrane adhesion molecules;GO:0007043,cell-cell junction assembly;G…
KAZRN_MOUSE	Q69ZS8	Kazn	Kazrin	141.3	164	170.9	181	166.4	183.1	150.8	204	138.8	158.733	176.833	164.533	158.733	176.833	164.533	1.11403	0.155836	0	1.03654	0.804564	0	0.930443	0.584562	0	GO:0001533,cornified envelope;GO:0005856,cytoskeleton;GO:0005829,cytosol;GO:0030057,desmosome;GO:0016607,nuclear speck;GO:0005654,nucleoplasm		GO:0031424,keratinization
SERB_MOUSE	Q99LS3	Psph	Phosphoserine phosphatase	277.4	285.7	282.7	315.6	294.2	281.9	246.8	255	236.4	281.933	297.233	246.067	281.933	297.233	246.067	1.05427	0.205847	0	0.872783	0.003709	0	0.827857	0.010339	-1	GO:0005737,cytoplasm;GO:0043005,neuron projection	GO:0004647,phosphoserine phosphatase activity;GO:0005509,calcium ion binding;GO:0042802,identical protein binding;GO:0000287,magnesium ion binding;GO:0016791,phosphatase activity;GO:0042803,protein homodimerization activity	GO:0006564,L-serine biosynthetic process;GO:0016311,dephosphorylation;GO:0001701,in utero embryonic development;GO:0006563,L-serine metabolic process;GO:0009612,response to mechanical stimulus;GO:0031667,response to nutrient levels;GO:0033574,response to testosterone	mmu:100678,path:mmu00260,Glycine, serine and threonine metabolism
MIO_MOUSE	Q8VE19	Mios	GATOR complex protein MIOS	309	309.9	347.1	340.5	295.4	298.5	268.6	314.3	310	322	311.467	297.633	322	311.467	297.633	0.967288	0.612671	0	0.924327	0.273892	0	0.955586	0.538427	0	GO:0030054,cell junction;GO:0005737,cytoplasm;GO:0005829,cytosol;GO:0061700,GATOR2 complex;GO:0005765,lysosomal membrane;GO:0005654,nucleoplasm		GO:0034629,cellular protein-containing complex localization;GO:0034198,cellular response to amino acid starvation;GO:0032008,positive regulation of TOR signaling	mmu:252875,path:mmu04150,mTOR signaling pathway
THSD4_MOUSE	Q3UTY6	Thsd4	Thrombospondin type-1 domain-containing protein 4	104.9	96.9	122.5	105.5	119.8	145.5	114.5	97.2	82.2	108.1	123.6	97.9667	108.1	123.6	97.9667	1.14339	0.328273	0	0.90626	0.446348	0	0.792611	0.161951	0	GO:0031012,extracellular matrix;GO:0001527,microfibril	GO:0008233,peptidase activity	GO:0048251,elastic fiber assembly	mmu:207596,path:mmu04350,TGF-beta signaling pathway
TCP4_MOUSE	P11031	Sub1	Activated RNA polymerase II transcriptional coactivator p15	1938.7	1958.4	2080.4	2129.3	3542.3	3545.6	3574.1	3670.9	3439.6	1992.5	3072.4	3561.53	1992.5	3072.4	3561.53	1.54198	0.084781	0	1.78747	4.1e-05	1	1.1592	0.362485	0	GO:0005730,nucleolus;GO:0005654,nucleoplasm;GO:0005634,nucleus;GO:0005667,transcription regulator complex	GO:0033613,activating transcription factor binding;GO:0003678,DNA helicase activity;GO:0042802,identical protein binding;GO:0000978,RNA polymerase II cis-regulatory region sequence-specific DNA binding;GO:0003697,single-stranded DNA binding;GO:0003713,transcription coactivator activity	GO:0051053,negative regulation of DNA metabolic process;GO:0060261,positive regulation of transcription initiation from RNA polymerase II promoter;GO:0051260,protein homooligomerization;GO:0006357,regulation of transcription by RNA polymerase II;GO:0060395,SMAD protein signal transduction
ETFD_MOUSE	Q921G7	Etfdh	Electron transfer flavoprotein-ubiquinone oxidoreductase, mitochondrial	1696.8	2826	1772.1	3180	3627.4	3925.7	3445	3768.6	3810.9	2098.3	3577.7	3674.83	2098.3	3577.7	3674.83	1.70505	0.025151	1	1.75134	0.014577	1	1.02715	0.712647	0	GO:0031305,integral component of mitochondrial inner membrane;GO:0016020,membrane;GO:0017133,mitochondrial electron transfer flavoprotein complex;GO:0005743,mitochondrial inner membrane;GO:0031966,mitochondrial membrane;GO:0005739,mitochondrion	GO:0051539,4 iron;GO:0004174,electron-transferring-flavoprotein dehydrogenase activity;GO:0046872,metal ion binding;GO:0009055,electron transfer activity;GO:0051536,iron-sulfur cluster binding;GO:0016491,oxidoreductase activity;GO:0043783,oxidoreductase activity;GO:0048038,quinone binding;GO:0048039,ubiquinone binding	GO:0022900,electron transport chain;GO:0033539,fatty acid beta-oxidation using acyl-CoA dehydrogenase;GO:0022904,respiratory electron transport chain;GO:0006979,response to oxidative stress
K1C18_MOUSE	P05784	Krt18	Keratin, type I cytoskeletal 18	743.7	875.5	1210.2	936.8	3631.4	1392.1	1159.4	4106	1433.4	943.133	1986.77	2232.93	943.133	1986.77	2232.93	2.10656	0.284025	0	2.36757	0.246135	0	1.1239	0.854138	0	GO:0071944,cell periphery;GO:0034451,centriolar satellite;GO:0005737,cytoplasm;GO:0005829,cytosol;GO:0005882,intermediate filament;GO:0045095,keratin filament;GO:0005815,microtubule organizing center;GO:0016363,nuclear matrix;GO:0005730,nucleolus	GO:0097110,scaffold protein binding;GO:0005198,structural molecule activity	GO:0097191,extrinsic apoptotic signaling pathway;GO:0043000,Golgi to plasma membrane CFTR protein transport;GO:0097284,hepatocyte apoptotic process;GO:0045104,intermediate filament cytoskeleton organization;GO:0043066,negative regulation of apoptotic process;GO:0033209,tumor necrosis factor-mediated signaling pathway	mmu:16668,path:mmu04915,Estrogen signaling pathway;mmu:16668,path:mmu05150,Staphylococcus aureus infection
MYLK_MOUSE	Q6PDN3	Mylk	Myosin light chain kinase, smooth muscle	265.5	1217.7	285.5	1403.2	1201.4	1087.9	1052.3	1140.3	1135.7	589.567	1230.83	1109.43	589.567	1230.83	1109.43	2.08769	0.121717	0	1.88178	0.174661	0	0.901368	0.276957	0	GO:0032154,cleavage furrow;GO:0005737,cytoplasm;GO:0030027,lamellipodium;GO:0001725,stress fiber;GO:0015629,actin cytoskeleton;GO:0005911,cell-cell junction;GO:0005886,plasma membrane	GO:0005524,ATP binding;GO:0004687,myosin light chain kinase activity;GO:0003779,actin binding;GO:0005516,calmodulin binding;GO:0019899,enzyme binding;GO:0046872,metal ion binding;GO:0004672,protein kinase activity	GO:0060414,aorta smooth muscle tissue morphogenesis;GO:0032060,bleb assembly;GO:0071476,cellular hypotonic response;GO:0051928,positive regulation of calcium ion transport;GO:0030335,positive regulation of cell migration;GO:0090303,positive regulation of wound healing;GO:0072358,cardiovascular system development;GO:0071277,cellular response to calcium ion;GO:0035690,cellular response to drug;GO:0…	mmu:107589,path:mmu04371,Apelin signaling pathway;mmu:107589,path:mmu04020,Calcium signaling pathway;mmu:107589,path:mmu04022,cGMP-PKG signaling pathway;mmu:107589,path:mmu04510,Focal adhesion;mmu:107589,path:mmu04810,Regulation of actin cytoskeleton;mmu:107589,path:mmu04611,Platelet activation;mmu:107589,path:mmu04921,Oxytocin signaling pathway;mmu:107589,path:mmu04270,Vascular smooth muscle con…
CCDC6_MOUSE	D3YZP9	Ccdc6	Coiled-coil domain-containing protein 6	2197.9	2240.4	2381	2428.1	2276.7	2320.6	2023.1	2223.8	2005.4	2273.1	2341.8	2084.1	2273.1	2341.8	2084.1	1.03022	0.389842	0	0.916854	0.101622	0	0.889956	0.036357	0	GO:0005856,cytoskeleton;GO:0005829,cytosol	GO:0017124,SH3 domain binding		mmu:76551,path:mmu05200,Pathways in cancer;mmu:76551,path:mmu05216,Thyroid cancer
ACY2_MOUSE	Q8R3P0	Aspa	Aspartoacylase	499.1	594.2	547	580.4	2429	2633.6	2240.9	2766.8	1871.9	546.767	1881	2293.2	546.767	1881	2293.2	3.44022	0.110754	0	4.19411	0.002598	1	1.21914	0.588988	0	GO:0005737,cytoplasm;GO:0005829,cytosol;GO:0005634,nucleus	GO:0016788,hydrolase activity;GO:0004046,aminoacylase activity;GO:0019807,aspartoacylase activity;GO:0016811,hydrolase activity;GO:0042802,identical protein binding;GO:0046872,metal ion binding	GO:0006083,acetate metabolic process;GO:0022010,central nervous system myelination;GO:0048714,positive regulation of oligodendrocyte differentiation	mmu:11484,path:mmu00250,Alanine, aspartate and glutamate metabolism;mmu:11484,path:mmu00340,Histidine metabolism
ENTP2_MOUSE	O55026	Entpd2	Ectonucleoside triphosphate diphosphohydrolase 2	648.3	1547.5	636.7	1649.6	1600	1521.1	1550.9	1648	1570.8	944.167	1590.23	1589.9	944.167	1590.23	1589.9	1.68427	0.100746	0	1.68392	0.100187	0	0.99979	0.994761	0	GO:0005604,basement membrane;GO:0044297,cell body;GO:0031253,cell projection membrane;GO:0009986,cell surface;GO:0016021,integral component of membrane;GO:0005886,plasma membrane	GO:0043262,adenosine-diphosphatase activity;GO:0005524,ATP binding;GO:0016887,ATPase activity;GO:0042802,identical protein binding;GO:0017110,nucleoside-diphosphatase activity;GO:0017111,nucleoside-triphosphatase activity	GO:0071354,cellular response to interleukin-6;GO:0007186,G protein-coupled receptor signaling pathway;GO:0030168,platelet activation;GO:0009181,purine ribonucleoside diphosphate catabolic process	mmu:12496,path:mmu00230,Purine metabolism;mmu:12496,path:mmu04742,Taste transduction
BT3L4_MOUSE	Q9CQH7	Btf3l4	Transcription factor BTF3 homolog 4	1360.4	1259.5	1356.3	1441.6	1340.4	1439.4	1260.2	1255.4	1092.8	1325.4	1407.13	1202.8	1325.4	1407.13	1202.8	1.06167	0.15643	0	0.9075	0.128535	0	0.854788	0.033682	0
PALM2_MOUSE	Q8BR92	Palm2	Paralemmin-2	1775.3	1734.6	1869.6	2554.3	1773.5	2011.9	1706.2	1943.7	1616.7	1793.17	2113.23	1755.53	1793.17	2113.23	1755.53	1.17849	0.243947	0	0.979013	0.739189	0	0.830733	0.226919	0	GO:0005886,plasma membrane		GO:0008360,regulation of cell shape
Q5FWJ7_MOUSE	Q5FWJ7	Vti1a	Vesicle transport through interaction with t-SNAREs homolog 1A	616.3	676.5	672.8	684.5	1144	1213.5	1040.9	1179.1	1035.9	655.2	1014	1085.3	655.2	1014	1085.3	1.54762	0.098297	0	1.65644	0.001067	1	1.07032	0.700516	0	GO:0005776,autophagosome;GO:0030136,clathrin-coated vesicle;GO:0005829,cytosol;GO:0005789,endoplasmic reticulum membrane;GO:0005768,endosome;GO:0012507,ER to Golgi transport vesicle membrane;GO:0005794,Golgi apparatus;GO:0000139,Golgi membrane;GO:0016021,integral component of membrane;GO:0043231,intracellular membrane-bounded organelle;GO:0031902,late endosome membrane;GO:0044306,neuron projectio…	GO:0005484,SNAP receptor activity;GO:0000149,SNARE binding	GO:0006914,autophagy;GO:0006888,endoplasmic reticulum to Golgi vesicle-mediated transport;GO:0090161,Golgi ribbon formation;GO:0006896,Golgi to vacuole transport;GO:0006891,intra-Golgi vesicle-mediated transport;GO:0006623,protein targeting to vacuole;GO:0042147,retrograde transport;GO:0016189,synaptic vesicle to endosome fusion;GO:0048280,vesicle fusion with Golgi apparatus;GO:0050882,voluntary …	mmu:53611,path:mmu04130,SNARE interactions in vesicular transport
SYLM_MOUSE	Q8VDC0	Lars2	Probable leucine--tRNA ligase, mitochondrial	828.9	1401.7	817.9	1502.6	1374.3	1417.7	1289.8	1384.5	1351.6	1016.17	1431.53	1341.97	1016.17	1431.53	1341.97	1.40876	0.101975	0	1.32062	0.169713	0	0.937433	0.128173	0	GO:0005759,mitochondrial matrix;GO:0005739,mitochondrion	GO:0002161,aminoacyl-tRNA editing activity;GO:0005524,ATP binding;GO:0004823,leucine-tRNA ligase activity	GO:0006429,leucyl-tRNA aminoacylation;GO:0032543,mitochondrial translation	mmu:102436,path:mmu00970,Aminoacyl-tRNA biosynthesis
STX1A_MOUSE	O35526	Stx1a	Syntaxin-1A	4099	4074.8	3396	3389.5	3551.6	2507.3	3885.4	3477.4	3772.2	3856.6	3149.47	3711.67	3856.6	3149.47	3711.67	0.816643	0.150226	0	0.962419	0.607653	0	1.17851	0.180029	0	GO:0001669,acrosomal vesicle;GO:0042641,actomyosin;GO:0030424,axon;GO:0012505,endomembrane system;GO:0098978,glutamatergic synapse;GO:0016021,integral component of membrane;GO:0005887,integral component of plasma membrane;GO:0099056,integral component of presynaptic membrane;GO:0030285,integral component of synaptic vesicle membrane;GO:0043229,intracellular organelle;GO:0016020,membrane;GO:004300…	GO:0043008,ATP-dependent protein binding;GO:0019855,calcium channel inhibitor activity;GO:0048306,calcium-dependent protein binding;GO:0019869,chloride channel inhibitor activity;GO:0042802,identical protein binding;GO:0044325,ion channel binding;GO:0019900,kinase binding;GO:0017022,myosin binding;GO:0032028,myosin head/neck binding;GO:0019904,protein domain specific binding;GO:0047485,protein N-…	GO:0017156,calcium-ion regulated exocytosis;GO:0006887,exocytosis;GO:0046879,hormone secretion;GO:0030073,insulin secretion;GO:0006886,intracellular protein transport;GO:0098815,modulation of excitatory postsynaptic potential;GO:0045956,positive regulation of calcium ion-dependent exocytosis;GO:0033605,positive regulation of catecholamine secretion;GO:2000463,positive regulation of excitatory pos…	mmu:20907,path:mmu04130,SNARE interactions in vesicular transport;mmu:20907,path:mmu04911,Insulin secretion;mmu:20907,path:mmu04721,Synaptic vesicle cycle;mmu:20907,path:mmu05031,Amphetamine addiction
B1AR74_MOUSE	B1AR74	Bcas3	Breast carcinoma-amplified sequence 3 homolog	508.8	999.6	543.6	1041.9	1079.9	1262.1	1000.4	996.4	955.7	684	1127.97	984.167	684	1127.97	984.167	1.64907	0.061351	0	1.43884	0.13165	0	0.872514	0.107134	0	GO:0031252,cell leading edge;GO:0071944,cell periphery;GO:0005737,cytoplasm;GO:0005881,cytoplasmic microtubule;GO:0045111,intermediate filament cytoskeleton;GO:0005634,nucleus;GO:0035327,transcriptionally active chromatin	GO:0010698,acetyltransferase activator activity;GO:0048487,beta-tubulin binding;GO:0003682,chromatin binding;GO:0035035,histone acetyltransferase binding;GO:0042393,histone binding;GO:0035257,nuclear hormone receptor binding;GO:0008134,transcription factor binding	GO:0090630,activation of GTPase activity;GO:0001525,angiogenesis;GO:0071391,cellular response to estrogen stimulus;GO:0007030,Golgi organization;GO:0031023,microtubule organizing center organization;GO:0051895,negative regulation of focal adhesion assembly;GO:0034260,negative regulation of GTPase activity;GO:2000251,positive regulation of actin cytoskeleton reorganization;GO:0043085,positive regu…
S4R248_MOUSE	S4R248	Arhgap12	Rho GTPase-activating protein 12	2672.6	2437.2	2765.5	2709.2	2473	2598.2	2291.9	2249.2	2157.3	2625.1	2593.47	2232.8	2625.1	2593.47	2232.8	0.98795	0.803778	0	0.850558	0.020479	0	0.860933	0.01027	0	GO:0005737,cytoplasm;GO:0001891,phagocytic cup	GO:0005096,GTPase activator activity	GO:0007165,signal transduction;GO:0007015,actin filament organization;GO:0002011,morphogenesis of an epithelial sheet;GO:0051058,negative regulation of small GTPase mediated signal transduction;GO:0006911,phagocytosis;GO:0043087,regulation of GTPase activity
BCAM_MOUSE	Q9R069	Bcam	Basal cell adhesion molecule	1178	1204.5	1313.1	1295.7	1271.3	1118.7	1099.9	1302.6	1116.4	1231.87	1228.57	1172.97	1231.87	1228.57	1172.97	0.997321	0.964202	0	0.952186	0.487055	0	0.954744	0.550469	0	GO:0009986,cell surface;GO:0005887,integral component of plasma membrane;GO:0005886,plasma membrane	GO:0043236,laminin binding;GO:0005055,laminin receptor activity;GO:0008022,protein C-terminus binding	GO:0007155,cell adhesion;GO:0007160,cell-matrix adhesion
EFTS_MOUSE	Q9CZR8	Tsfm	Elongation factor Ts, mitochondrial	1019.9	1171.5	1180.3	1206.4	3383.1	3458	3146.8	3621	3269.4	1123.9	2682.5	3345.73	1123.9	2682.5	3345.73	2.38678	0.102995	0	2.9769	0.000125	1	1.24724	0.427564	0	GO:0005739,mitochondrion;GO:0005759,mitochondrial matrix;GO:0005654,nucleoplasm	GO:0003746,translation elongation factor activity	GO:0070125,mitochondrial translational elongation;GO:0070129,regulation of mitochondrial translation;GO:0006414,translational elongation
J3QN89_MOUSE	J3QN89	Aamp	Angio-associated migratory protein	539.8	532.3	554.3	594.4	558.7	552.2	493.8	584.8	489.9	542.133	568.433	522.833	542.133	568.433	522.833	1.04851	0.146452	0	0.9644	0.575159	0	0.91978	0.247026	0	GO:0009986,cell surface;GO:0005829,cytosol;GO:0045171,intercellular bridge;GO:0015630,microtubule cytoskeleton	GO:0008201,heparin binding
KHDR1_MOUSE	Q60749	Khdrbs1	KH domain-containing, RNA-binding, signal transduction-associated protein 1	2368.9	2128.3	1831.7	1974.1	2236	1828.8	2568.1	2385.7	2499.6	2109.63	2012.97	2484.47	2109.63	2012.97	2484.47	0.954178	0.64737	0	1.17768	0.084542	0	1.23423	0.022485	1	GO:0005737,cytoplasm;GO:0070618,Grb2-Sos complex;GO:0016020,membrane;GO:0005654,nucleoplasm;GO:0005634,nucleus;GO:0032991,protein-containing complex	GO:0042802,identical protein binding;GO:0003729,mRNA binding;GO:0008143,poly(A) binding;GO:0008266,poly(U) RNA binding;GO:0019904,protein domain specific binding;GO:1990782,protein tyrosine kinase binding;GO:0044877,protein-containing complex binding;GO:0003723,RNA binding;GO:0017124,SH3 domain binding;GO:0035591,signaling adaptor activity	GO:0007049,cell cycle;GO:0007166,cell surface receptor signaling pathway;GO:0006397,mRNA processing;GO:0000122,negative regulation of transcription by RNA polymerase II;GO:0046833,positive regulation of RNA export from nucleus;GO:0045948,positive regulation of translational initiation;GO:0000381,regulation of alternative mRNA splicing;GO:0048024,regulation of mRNA splicing;GO:0046831,regulation o…
PP4R4_MOUSE	Q8C0Y0	Ppp4r4	Serine/threonine-protein phosphatase 4 regulatory subunit 4	630.2	687.3	729.6	723.8	693.3	657.6	605.4	746.8	681.6	682.367	691.567	677.933	682.367	691.567	677.933	1.01348	0.803322	0	0.993503	0.933595	0	0.980286	0.777574	0	GO:0005737,cytoplasm;GO:0005829,cytosol;GO:0008287,protein serine/threonine phosphatase complex	GO:0019888,protein phosphatase regulator activity	GO:0001835,blastocyst hatching;GO:0032515,negative regulation of phosphoprotein phosphatase activity;GO:0080163,regulation of protein serine/threonine phosphatase activity
K3W4L3_MOUSE	K3W4L3	Psap	Prosaposin	3789	10384.9	4040.2	10941	12735	12520.1	11520	12864.4	10676.1	6071.37	12065.4	11686.8	6071.37	12065.4	11686.8	1.98726	0.054838	0	1.92491	0.067077	0	0.968626	0.679814	0	GO:0016235,aggresome;GO:0005737,cytoplasm;GO:0005576,extracellular region;GO:0005615,extracellular space;GO:0043231,intracellular membrane-bounded organelle;GO:0005770,late endosome;GO:0005764,lysosome;GO:0005739,mitochondrion;GO:0032991,protein-containing complex	GO:0004565,beta-galactosidase activity;GO:0001664,G protein-coupled receptor binding;GO:1905573,ganglioside GM1 binding;GO:1905574,ganglioside GM2 binding;GO:1905575,ganglioside GM3 binding;GO:1905577,ganglioside GP1c binding;GO:1905576,ganglioside GT1b binding;GO:0042802,identical protein binding;GO:0030882,lipid antigen binding;GO:0005543,phospholipid binding;GO:0002020,protease binding;GO:0042…	GO:0007193,adenylate cyclase-inhibiting G protein-coupled receptor signaling pathway;GO:0019882,antigen processing and presentation;GO:0071310,cellular response to organic substance;GO:0006672,ceramide metabolic process;GO:0021702,cerebellar Purkinje cell differentiation;GO:0090102,cochlea development;GO:0003335,corneocyte development;GO:1903575,cornified envelope assembly;GO:0048589,developmenta…	mmu:19156,path:mmu04142,Lysosome
G3X920_MOUSE	G3X920	Armc8	Armadillo repeat-containing protein 8	690.7	1299.5	741.5	1413.5	1301.7	1392.3	1186	1282.5	1209	910.567	1369.17	1225.83	910.567	1369.17	1225.83	1.50364	0.081489	0	1.34623	0.18509	0	0.895313	0.0333	0	GO:0005737,cytoplasm;GO:0005634,nucleus;GO:0000151,ubiquitin ligase complex;GO:0034657,GID complex		GO:0043161,proteasome-mediated ubiquitin-dependent protein catabolic process
NLTP_MOUSE	P32020	Scp2	Non-specific lipid-transfer protein	1028.2	2732.8	1102.7	2892.9	2751.2	2748.3	2557.8	2802.3	2668.8	1621.23	2797.47	2676.3	1621.23	2797.47	2676.3	1.72552	0.102835	0	1.65078	0.133006	0	0.956687	0.228429	0	GO:0005829,cytosol;GO:0005783,endoplasmic reticulum;GO:0019898,extrinsic component of membrane;GO:0031315,extrinsic component of mitochondrial outer membrane;GO:0043231,intracellular membrane-bounded organelle;GO:0016020,membrane;GO:0005739,mitochondrion;GO:0005654,nucleoplasm;GO:0005634,nucleus;GO:0005782,peroxisomal matrix;GO:0005777,peroxisome;GO:0032991,protein-containing complex	GO:0016747,transferase activity;GO:0003824,catalytic activity;GO:0003988,acetyl-CoA C-acyltransferase activity;GO:0050633,acetyl-CoA C-myristoyltransferase activity;GO:0015485,cholesterol binding;GO:0120020,cholesterol transfer activity;GO:0000062,fatty-acyl-CoA binding;GO:0042802,identical protein binding;GO:0036042,long-chain fatty acyl-CoA binding;GO:0070538,oleic acid binding;GO:0120019,phosp…	GO:0006637,acyl-CoA metabolic process;GO:0007568,aging;GO:0008206,bile acid metabolic process;GO:0006635,fatty acid beta-oxidation;GO:0032959,inositol trisphosphate biosynthetic process;GO:1901373,lipid hydroperoxide transport;GO:0007031,peroxisome organization;GO:0015914,phospholipid transport;GO:0043065,positive regulation of apoptotic process;GO:0045542,positive regulation of cholesterol biosy…	mmu:20280,path:mmu00120,Primary bile acid biosynthesis;mmu:20280,path:mmu01040,Biosynthesis of unsaturated fatty acids;mmu:20280,path:mmu04146,Peroxisome;mmu:20280,path:mmu03320,PPAR signaling pathway
CATD_MOUSE	P18242	Ctsd	Cathepsin D	3320.5	3503.5	3525.4	3740.8	3748.9	3634.2	3210.3	3702.3	4766.8	3449.8	3707.97	3893.13	3449.8	3707.97	3893.13	1.07483	0.02595	0	1.12851	0.393371	0	1.04994	0.708364	0	GO:0062023,collagen-containing extracellular matrix;GO:0010008,endosome membrane;GO:0005615,extracellular space;GO:0005765,lysosomal membrane;GO:0005764,lysosome;GO:0042470,melanosome;GO:0045121,membrane raft;GO:0005739,mitochondrion	GO:0004190,aspartic-type endopeptidase activity;GO:0070001,aspartic-type peptidase activity;GO:0004175,endopeptidase activity;GO:0016787,hydrolase activity;GO:0008233,peptidase activity;GO:0042277,peptide binding	GO:0000045,autophagosome assembly;GO:0042159,lipoprotein catabolic process;GO:0043065,positive regulation of apoptotic process;GO:0043280,positive regulation of cysteine-type endopeptidase activity involved in apoptotic process;GO:0030163,protein catabolic process;GO:0006508,proteolysis;GO:0070201,regulation of establishment of protein localization	mmu:13033,path:mmu04071,Sphingolipid signaling pathway;mmu:13033,path:mmu04142,Lysosome;mmu:13033,path:mmu04140,Autophagy - animal;mmu:13033,path:mmu04210,Apoptosis;mmu:13033,path:mmu04915,Estrogen signaling pathway;mmu:13033,path:mmu05152,Tuberculosis
COX41_MOUSE	P19783	Cox4i1	Cytochrome c oxidase subunit 4 isoform 1, mitochondrial	8802.9	8692.4	9228.1	8699.6	8361.3	8973.1	7395.1	7510	8290.5	8907.8	8678	7731.87	8907.8	8678	7731.87	0.974202	0.393923	0	0.867988	0.022446	0	0.890973	0.046528	0	GO:0016021,integral component of membrane;GO:0005829,cytosol;GO:0005743,mitochondrial inner membrane;GO:0031966,mitochondrial membrane;GO:0005751,mitochondrial respiratory chain complex IV;GO:0005739,mitochondrion;GO:0005654,nucleoplasm	GO:0004129,cytochrome-c oxidase activity	GO:0006123,mitochondrial electron transport;GO:0007584,response to nutrient	mmu:12857,path:mmu00190,Oxidative phosphorylation;mmu:12857,path:mmu04260,Cardiac muscle contraction;mmu:12857,path:mmu04714,Thermogenesis;mmu:12857,path:mmu05010,Alzheimer disease;mmu:12857,path:mmu05012,Parkinson disease;mmu:12857,path:mmu05016,Huntington disease;mmu:12857,path:mmu04932,Non-alcoholic fatty liver disease (NAFLD)
SCAM4_MOUSE	Q9JKV5	Scamp4	Secretory carrier-associated membrane protein 4	693	657.7	758.5	723.8	2363	2313.5	2140.5	2474.6	2207.8	703.067	1800.1	2274.3	703.067	1800.1	2274.3	2.56035	0.111608	0	3.23483	0.000122	1	1.26343	0.43561	0	GO:0016021,integral component of membrane;GO:0005794,Golgi apparatus;GO:0000139,Golgi membrane;GO:0055038,recycling endosome membrane;GO:0032588,trans-Golgi network membrane;GO:0030133,transport vesicle		GO:0015031,protein transport
GBRB2_MOUSE	P63137	Gabrb2	Gamma-aminobutyric acid receptor subunit beta-2	465.6	464.7	474.9	513.8	1354.7	1459.9	1437.8	1424.4	1292.9	468.4	1109.47	1385.03	468.4	1109.47	1385.03	2.36863	0.098954	0	2.95695	3.9e-05	1	1.24838	0.414446	0	GO:0034707,chloride channel complex;GO:0031410,cytoplasmic vesicle;GO:0005829,cytosol;GO:1902710,GABA receptor complex;GO:1902711,GABA-A receptor complex;GO:0098982,GABA-ergic synapse;GO:0005887,integral component of plasma membrane;GO:0099060,integral component of postsynaptic specialization membrane;GO:0016020,membrane;GO:0043005,neuron projection;GO:0005886,plasma membrane;GO:0045202,synapse	GO:0005254,chloride channel activity;GO:0004890,GABA-A receptor activity;GO:0022851,GABA-gated chloride ion channel activity;GO:0005237,inhibitory extracellular ligand-gated ion channel activity;GO:0030594,neurotransmitter receptor activity;GO:1904315,transmitter-gated ion channel activity involved in regulation of postsynaptic membrane potential	GO:0071420,cellular response to histamine;GO:0007268,chemical synaptic transmission;GO:1902476,chloride transmembrane transport;GO:0090102,cochlea development;GO:0007214,gamma-aminobutyric acid signaling pathway;GO:1904862,inhibitory synapse assembly;GO:0060119,inner ear receptor cell development;GO:0060384,innervation;GO:0034220,ion transmembrane transport;GO:0043524,negative regulation of neuro…	mmu:14401,path:mmu04080,Neuroactive ligand-receptor interaction;mmu:14401,path:mmu04727,GABAergic synapse;mmu:14401,path:mmu04726,Serotonergic synapse;mmu:14401,path:mmu04723,Retrograde endocannabinoid signaling;mmu:14401,path:mmu05032,Morphine addiction;mmu:14401,path:mmu05033,Nicotine addiction
RS6_MOUSE	P62754	Rps6	40S ribosomal protein S6	1382.7	2932.2	1439.7	3025.5	2740.4	2766.5	2677.2	3141	2805.6	1918.2	2844.13	2874.6	1918.2	2844.13	2874.6	1.48271	0.146808	0	1.49859	0.143036	0	1.01071	0.862915	0	GO:0044297,cell body;GO:0005737,cytoplasm;GO:0036464,cytoplasmic ribonucleoprotein granule;GO:0005829,cytosol;GO:0022627,cytosolic small ribosomal subunit;GO:0030425,dendrite;GO:0005783,endoplasmic reticulum;GO:0005730,nucleolus;GO:0005634,nucleus;GO:0048471,perinuclear region of cytoplasm;GO:0005844,polysome;GO:1990904,ribonucleoprotein complex;GO:0005840,ribosome;GO:0015935,small ribosomal subu…	GO:0003729,mRNA binding;GO:0019901,protein kinase binding;GO:0003735,structural constituent of ribosome	GO:0006924,activation-induced cell death of T cells;GO:0048821,erythrocyte development;GO:0000082,G1/S transition of mitotic cell cycle;GO:0007369,gastrulation;GO:0042593,glucose homeostasis;GO:0022605,mammalian oogenesis stage;GO:0000278,mitotic cell cycle;GO:0007093,mitotic cell cycle checkpoint;GO:0043066,negative regulation of apoptotic process;GO:0001890,placenta development;GO:0043065,posit…	mmu:20104,path:mmu03010,Ribosome;mmu:20104,path:mmu04371,Apelin signaling pathway;mmu:20104,path:mmu04066,HIF-1 signaling pathway;mmu:20104,path:mmu04151,PI3K-Akt signaling pathway;mmu:20104,path:mmu04150,mTOR signaling pathway;mmu:20104,path:mmu04910,Insulin signaling pathway;mmu:20104,path:mmu04714,Thermogenesis;mmu:20104,path:mmu05205,Proteoglycans in cancer;mmu:20104,path:mmu01521,EGFR tyrosi…
PGM5_MOUSE	Q8BZF8	Pgm5	Phosphoglucomutase-like protein 5	443	448.3	478.4	489.4	443.2	445.6	2209.5	2356	2236.9	456.567	459.4	2267.47	456.567	459.4	2267.47	1.00621	0.88647	0	4.96634	3e-06	1	4.93571	3e-06	1	GO:0005912,adherens junction;GO:0030055,cell-substrate junction;GO:0043034,costamere;GO:0009898,cytoplasmic side of plasma membrane;GO:0005829,cytosol;GO:0016010,dystrophin-associated glycoprotein complex;GO:0005925,focal adhesion;GO:0014704,intercalated disc;GO:0042383,sarcolemma;GO:0005914,spot adherens junction;GO:0001725,stress fiber;GO:0030018,Z disc	GO:0000287,magnesium ion binding	GO:0005975,carbohydrate metabolic process;GO:0007155,cell adhesion;GO:0006006,glucose metabolic process;GO:0030239,myofibril assembly;GO:0014706,striated muscle tissue development
RPAB1_MOUSE	Q80UW8	Polr2e	DNA-directed RNA polymerases I, II, and III subunit RPABC1	645.3	697.9	705.5	729.9	671.6	693.3	599.2	739.6	630	682.9	698.267	656.267	682.9	698.267	656.267	1.0225	0.578536	0	0.961	0.598373	0	0.939851	0.411718	0	GO:0042025,host cell nucleus;GO:0005654,nucleoplasm;GO:0005634,nucleus;GO:0005736,RNA polymerase I complex;GO:0005665,RNA polymerase II;GO:0005666,RNA polymerase III complex	GO:0003677,DNA binding;GO:0003899,DNA-directed 5'-3' RNA polymerase activity	GO:0006366,transcription by RNA polymerase II	mmu:66420,path:mmu03020,RNA polymerase;mmu:66420,path:mmu04623,Cytosolic DNA-sensing pathway;mmu:66420,path:mmu05016,Huntington disease
COQ6_MOUSE	Q8R1S0	Coq6	Ubiquinone biosynthesis monooxygenase COQ6, mitochondrial	744.2	754.8	826.1	832.4	765.6	814.3	649.8	752.8	645.5	775.033	804.1	682.7	775.033	804.1	682.7	1.0375	0.422269	0	0.880865	0.100988	0	0.849024	0.039594	0	GO:0042995,cell projection;GO:0031314,extrinsic component of mitochondrial inner membrane;GO:0005794,Golgi apparatus;GO:0005739,mitochondrion	GO:0071949,FAD binding;GO:0016709,oxidoreductase activity;GO:0016712,oxidoreductase activity;GO:0050660,flavin adenine dinucleotide binding;GO:0016491,oxidoreductase activity	GO:0006744,ubiquinone biosynthetic process	mmu:217707,path:mmu00130,Ubiquinone and other terpenoid-quinone biosynthesis
STT3A_MOUSE	P46978	Stt3a	Dolichyl-diphosphooligosaccharide--protein glycosyltransferase subunit STT3A	1240.7	1140.9	1309.2	1228.6	1282.1	1381.3	1088.8	1232.1	1546.5	1230.27	1297.33	1289.13	1230.27	1297.33	1289.13	1.05451	0.368626	0	1.04785	0.703109	0	0.993679	0.956835	0	GO:0016021,integral component of membrane;GO:0016020,membrane;GO:0008250,oligosaccharyltransferase complex;GO:0035000,oligosaccharyltransferase III complex	GO:0004579,dolichyl-diphosphooligosaccharide-protein glycotransferase activity;GO:0046872,metal ion binding;GO:0004576,oligosaccharyl transferase activity	GO:0043686,co-translational protein modification;GO:0043687,post-translational protein modification;GO:0006487,protein N-linked glycosylation;GO:0018279,protein N-linked glycosylation via asparagine;GO:0006486,protein glycosylation	mmu:16430,path:mmu00510,N-Glycan biosynthesis;mmu:16430,path:mmu00513,Various types of N-glycan biosynthesis;mmu:16430,path:mmu04141,Protein processing in endoplasmic reticulum
RIT2_MOUSE	P70425	Rit2	GTP-binding protein Rit2	862.5	916.5	889.7	865.7	835.6	852	794.4	866.6	1213.1	889.567	851.1	958.033	889.567	851.1	958.033	0.956758	0.097466	0	1.07697	0.626695	0	1.12564	0.455412	0	GO:0016020,membrane;GO:0044297,cell body;GO:0005737,cytoplasm;GO:0097447,dendritic tree;GO:0045121,membrane raft;GO:0043005,neuron projection;GO:0005634,nucleus;GO:0005886,plasma membrane	GO:0005525,GTP binding;GO:0003924,GTPase activity;GO:0005516,calmodulin binding;GO:0003682,chromatin binding;GO:0019003,GDP binding;GO:0030215,semaphorin receptor binding	GO:0007165,signal transduction;GO:0007189,adenylate cyclase-activating G protein-coupled receptor signaling pathway;GO:0035556,intracellular signal transduction;GO:0032507,maintenance of protein location in cell;GO:0010977,negative regulation of neuron projection development;GO:0043410,positive regulation of MAPK cascade;GO:0010976,positive regulation of neuron projection development;GO:0045944,p…
CAH14_MOUSE	Q9WVT6	Ca14	Carbonic anhydrase 14	882.2	859.7	857.4	897.4	866	840.5	769.8	791.3	728.9	866.433	867.967	763.333	866.433	867.967	763.333	1.00177	0.937106	0	0.881006	0.006647	0	0.87945	0.013143	0	GO:0016021,integral component of membrane;GO:0005886,plasma membrane	GO:0004089,carbonate dehydratase activity;GO:0016836,hydro-lyase activity;GO:0008270,zinc ion binding	GO:0015670,carbon dioxide transport;GO:0006730,one-carbon metabolic process;GO:0006885,regulation of pH	mmu:23831,path:mmu00910,Nitrogen metabolism
E9PZ88_MOUSE	E9PZ88	Man2c1	Alpha-mannosidase	731.2	760.2	771.4	797.5	757.1	815.3	686.9	768.2	669.7	754.267	789.967	708.267	754.267	789.967	708.267	1.04733	0.163957	0	0.939014	0.231674	0	0.896578	0.079386	0	GO:0005737,cytoplasm;GO:0005654,nucleoplasm	GO:0004559,alpha-mannosidase activity;GO:0030246,carbohydrate binding;GO:0046872,metal ion binding	GO:0006013,mannose metabolic process;GO:0009313,oligosaccharide catabolic process	mmu:73744,path:mmu00511,Other glycan degradation
GTPB1_MOUSE	O08582	Gtpbp1	GTP-binding protein 1	466.7	515.4	468.6	573.9	477.6	519.9	458.3	496.7	418	483.567	523.8	457.667	483.567	523.8	457.667	1.0832	0.2783	0	0.94644	0.403434	0	0.873743	0.139716	0	GO:0000177,cytoplasmic exosome (RNase complex);GO:0005829,cytosol	GO:0005525,GTP binding;GO:0003924,GTPase activity;GO:0003746,translation elongation factor activity	GO:0046039,GTP metabolic process;GO:0061014,positive regulation of mRNA catabolic process;GO:0006414,translational elongation
CYGB_MOUSE	Q9CX80	Cygb	Cytoglobin	624.1	1407.3	661.5	1357.5	1295.7	1336.2	1197.2	1330.5	1196.9	897.633	1329.8	1241.53	897.633	1329.8	1241.53	1.48145	0.166274	0	1.38312	0.254813	0	0.933624	0.139991	0	GO:0005737,cytoplasm;GO:0043005,neuron projection;GO:0043025,neuronal cell body	GO:0004096,catalase activity;GO:0047888,fatty acid peroxidase activity;GO:0020037,heme binding;GO:0005506,iron ion binding;GO:0019825,oxygen binding;GO:0005344,oxygen carrier activity;GO:0004601,peroxidase activity	GO:0019395,fatty acid oxidation;GO:0032966,negative regulation of collagen biosynthetic process;GO:0010764,negative regulation of fibroblast migration;GO:2000490,negative regulation of hepatic stellate cell activation;GO:0001666,response to hypoxia;GO:0006979,response to oxidative stress
A0A1Y7VN19_MOUSE	A0A1Y7VN19	Dhrs7	Dehydrogenase/reductase SDR family member 7 (Fragment)	2479.5	2781.7	2661.8	2642.9	2597.3	2409.3	2384.7	2835	2434.2	2641	2549.83	2551.3	2641	2549.83	2551.3	0.96548	0.466003	0	0.966036	0.620605	0	1.00057	0.993103	0		GO:0016491,oxidoreductase activity
PUR8_MOUSE	P54822	Adsl	Adenylosuccinate lyase	1459.2	1455	1518.5	1559.7	1455.1	1524.8	1315.1	1476.1	1573.6	1477.57	1513.2	1454.93	1477.57	1513.2	1454.93	1.02412	0.389545	0	0.984682	0.786393	0	0.961494	0.513674	0	GO:0005829,cytosol;GO:0005739,mitochondrion;GO:0032991,protein-containing complex	GO:0003824,catalytic activity;GO:0070626,(S)-2-(5-amino-1-(5-phospho-D-ribosyl)imidazole-4-carboxamido)succinate AMP-lyase (fumarate-forming) activity;GO:0004018,N6-(1;GO:0042802,identical protein binding	GO:0044208,'de novo' AMP biosynthetic process;GO:0006189,'de novo' IMP biosynthetic process;GO:0009152,purine ribonucleotide biosynthetic process;GO:0009060,aerobic respiration;GO:0006167,AMP biosynthetic process;GO:0006163,purine nucleotide metabolic process;GO:0001666,response to hypoxia;GO:0014850,response to muscle activity;GO:0007584,response to nutrient;GO:0042594,response to starvation;GO:…	mmu:11564,path:mmu00230,Purine metabolism;mmu:11564,path:mmu00250,Alanine, aspartate and glutamate metabolism
RAB35_MOUSE	Q6PHN9	Rab35	Ras-related protein Rab-35	1592.4	4016	1668.7	4265.2	4133.9	4109.5	3871.6	3842.4	3677.5	2425.7	4169.53	3797.17	2425.7	4169.53	3797.17	1.7189	0.09388	0	1.56539	0.160705	0	0.910693	0.008574	0	GO:0098993,anchored component of synaptic vesicle membrane;GO:0031253,cell projection membrane;GO:0045334,clathrin-coated endocytic vesicle;GO:0005905,clathrin-coated pit;GO:0012505,endomembrane system;GO:0010008,endosome membrane;GO:0045171,intercellular bridge;GO:0042470,melanosome;GO:0005739,mitochondrion;GO:0005886,plasma membrane	GO:0019003,GDP binding;GO:0005525,GTP binding;GO:0003924,GTPase activity;GO:0005546,phosphatidylinositol-4	GO:0019882,antigen processing and presentation;GO:1990090,cellular response to nerve growth factor stimulus;GO:0032456,endocytic recycling;GO:0016197,endosomal transport;GO:0006886,intracellular protein transport;GO:0000281,mitotic cytokinesis;GO:0031175,neuron projection development;GO:0048227,plasma membrane to endosome transport;GO:0008104,protein localization;GO:0036010,protein localization t…	mmu:77407,path:mmu04144,Endocytosis
S10AD_MOUSE	P97352	S100a13	Protein S100-A13	1492.1	4535.8	1395.4	4337.3	4403.1	4393.6	4077.4	3983.3	3767.2	2474.43	4378	3942.63	2474.43	4378	3942.63	1.76929	0.138654	0	1.59335	0.229075	0	0.900556	0.00983	0	GO:0062023,collagen-containing extracellular matrix;GO:0005737,cytoplasm;GO:0005829,cytosol;GO:0005615,extracellular space;GO:0005730,nucleolus;GO:0005654,nucleoplasm;GO:0005634,nucleus;GO:0048471,perinuclear region of cytoplasm;GO:0005886,plasma membrane	GO:0005509,calcium ion binding;GO:0005507,copper ion binding;GO:0017134,fibroblast growth factor binding;GO:0008289,lipid binding;GO:0042803,protein homodimerization activity;GO:0050786,RAGE receptor binding;GO:0008270,zinc ion binding	GO:0050663,cytokine secretion;GO:0050703,interleukin-1 alpha secretion;GO:0008284,positive regulation of cell population proliferation;GO:0043123,positive regulation of I-kappaB kinase/NF-kappaB signaling;GO:0008360,regulation of cell shape
A0A0R4J138_MOUSE	A0A0R4J138	Arsb	Arylsulfatase B	324.6	363.1	322.5	357.4	337.6	389.6	947.8	1006.8	960.3	336.733	361.533	971.633	336.733	361.533	971.633	1.07365	0.284684	0	2.88547	9e-06	1	2.68754	1.3e-05	1	GO:0009986,cell surface;GO:0005794,Golgi apparatus;GO:0005764,lysosome;GO:0005739,mitochondrion;GO:0005791,rough endoplasmic reticulum	GO:0003943,N-acetylgalactosamine-4-sulfatase activity;GO:0004065,arylsulfatase activity;GO:0046872,metal ion binding;GO:0008484,sulfuric ester hydrolase activity	GO:0006914,autophagy;GO:0007417,central nervous system development;GO:0061580,colon epithelial cell migration;GO:0010976,positive regulation of neuron projection development;GO:0010632,regulation of epithelial cell migration;GO:0043627,response to estrogen;GO:0051597,response to methylmercury;GO:0007584,response to nutrient;GO:0009268,response to pH;GO:0097065,anterior head development	mmu:11881,path:mmu00531,Glycosaminoglycan degradation;mmu:11881,path:mmu04142,Lysosome
HS12B_MOUSE	Q9CZJ2	Hspa12b	Heat shock 70 kDa protein 12B	1298.4	1383.8	1388.2	1442.8	1332.3	1296.7	1249	1306.2	1222.4	1356.8	1357.27	1259.2	1356.8	1357.27	1259.2	1.00034	0.993373	0	0.928066	0.063336	0	0.927747	0.123863	0		GO:0005524,ATP binding
K1109_MOUSE	A2AAE1	Kiaa1109	Transmembrane protein KIAA1109	1094.8	1191.6	1238.2	2250.8	2351.4	1385.1	1158.2	1819.2	1423.8	1174.87	1995.77	1467.07	1174.87	1995.77	1467.07	1.69872	0.056896	0	1.24871	0.211452	0	0.735089	0.217806	0	GO:0016021,integral component of membrane;GO:0005634,nucleus;GO:0098793,presynapse		GO:0060612,adipose tissue development;GO:0032456,endocytic recycling;GO:0016197,endosomal transport;GO:0045444,fat cell differentiation;GO:0006629,lipid metabolic process;GO:0019915,lipid storage;GO:0051647,nucleus localization;GO:0006909,phagocytosis;GO:0001558,regulation of cell growth;GO:0007283,spermatogenesis;GO:0048488,synaptic vesicle endocytosis
PEX14_MOUSE	Q9R0A0	Pex14	Peroxisomal membrane protein PEX14	1163	1239.4	1295.5	1370.3	1276.1	1247.5	1186	1299	1142.4	1232.63	1297.97	1209.13	1232.63	1297.97	1209.13	1.053	0.28823	0	0.980935	0.717182	0	0.93156	0.210426	0	GO:0005778,peroxisomal membrane;GO:0001650,fibrillar center;GO:0016021,integral component of membrane;GO:1990429,peroxisomal importomer complex;GO:0005777,peroxisome;GO:0032991,protein-containing complex	GO:0048487,beta-tubulin binding;GO:0042802,identical protein binding;GO:0008017,microtubule binding;GO:0047485,protein N-terminus binding;GO:0005102,signaling receptor binding;GO:0003714,transcription corepressor activity	GO:0016560,protein import into peroxisome matrix;GO:0034453,microtubule anchoring;GO:0043433,negative regulation of DNA-binding transcription factor activity;GO:0032091,negative regulation of protein binding;GO:0045892,negative regulation of transcription;GO:0007031,peroxisome organization;GO:0036250,peroxisome transport along microtubule;GO:0016558,protein import into peroxisome matrix;GO:004472…	mmu:56273,path:mmu04146,Peroxisome
SNX16_MOUSE	Q8C080	Snx16	Sorting nexin-16	630.1	629.6	667.4	658.2	619.1	609.2	565	617.5	589.8	642.367	628.833	590.767	642.367	628.833	590.767	0.978932	0.525975	0	0.919672	0.058535	0	0.939465	0.148439	0	GO:0005829,cytosol;GO:0005769,early endosome;GO:0031901,early endosome membrane;GO:0031313,extrinsic component of endosome membrane;GO:0043231,intracellular membrane-bounded organelle;GO:0005770,late endosome;GO:0031902,late endosome membrane;GO:0005764,lysosome	GO:0042802,identical protein binding;GO:0035091,phosphatidylinositol binding	GO:0045022,early endosome to late endosome transport;GO:0008333,endosome to lysosome transport;GO:0006622,protein targeting to lysosome
SCN2B_MOUSE	Q56A07	Scn2b	Sodium channel subunit beta-2	1096.4	1123.4	1101.8	1211.7	1132.5	1224.4	1111.1	1200.9	1049.6	1107.2	1189.53	1120.53	1107.2	1189.53	1120.53	1.07436	0.051238	0	1.01204	0.78033	0	0.941994	0.259069	0	GO:0001518,voltage-gated sodium channel complex	GO:0017080,sodium channel regulator activity;GO:0005244,voltage-gated ion channel activity;GO:0005248,voltage-gated sodium channel activity;GO:0086006,voltage-gated sodium channel activity involved in cardiac muscle cell action potential	GO:0086002,cardiac muscle cell action potential involved in contraction;GO:0060048,cardiac muscle contraction;GO:0086012,membrane depolarization during cardiac muscle cell action potential;GO:0007399,nervous system development;GO:0060371,regulation of atrial cardiac muscle cell membrane depolarization;GO:0086091,regulation of heart rate by cardiac conduction;GO:2000649,regulation of sodium ion tr…
B7ZNF6_MOUSE	B7ZNF6	Ctnnd2	Catenin delta-2	5017.4	5694.8	5184	5713.2	5698.9	5987.6	5074.1	5320.6	5063.6	5298.73	5799.9	5152.77	5298.73	5799.9	5152.77	1.09458	0.089276	0	0.972453	0.544022	0	0.888423	0.00681	0	GO:0043204,perikaryon;GO:0005912,adherens junction;GO:0005911,cell-cell junction;GO:0005737,cytoplasm;GO:0030425,dendrite;GO:0043005,neuron projection;GO:0005634,nucleus;GO:0005886,plasma membrane;GO:0014069,postsynaptic density	GO:0008013,beta-catenin binding;GO:0045296,cadherin binding	GO:0098609,cell-cell adhesion;GO:0060997,dendritic spine morphogenesis;GO:0060828,regulation of canonical Wnt signaling pathway;GO:0007043,cell-cell junction assembly;GO:0007612,learning;GO:0001763,morphogenesis of a branching structure;GO:0048167,regulation of synaptic plasticity;GO:0050808,synapse organization	mmu:18163,path:mmu04310,Wnt signaling pathway
STX1B_MOUSE	P61264	Stx1b	Syntaxin-1B	6680.7	8497.4	6461.7	8277.3	8103.1	8386.9	8581.3	7657	7931.9	7213.27	8255.77	8056.73	7213.27	8255.77	8056.73	1.14453	0.18425	0	1.11693	0.295202	0	0.975892	0.525087	0	GO:0030424,axon;GO:0005813,centrosome;GO:0005737,cytoplasm;GO:0012505,endomembrane system;GO:0016021,integral component of membrane;GO:0099056,integral component of presynaptic membrane;GO:0016020,membrane;GO:0031594,neuromuscular junction;GO:0005652,nuclear lamina;GO:0005654,nucleoplasm;GO:0005634,nucleus;GO:0005886,plasma membrane;GO:0098793,presynapse;GO:0048787,presynaptic active zone membran…	GO:0019904,protein domain specific binding;GO:0019901,protein kinase binding;GO:0005102,signaling receptor binding;GO:0005484,SNAP receptor activity;GO:0000149,SNARE binding	GO:0048791,calcium ion-regulated exocytosis of neurotransmitter;GO:0098967,exocytic insertion of neurotransmitter receptor to postsynaptic membrane;GO:0006887,exocytosis;GO:0006886,intracellular protein transport;GO:1905302,negative regulation of macropinocytosis;GO:0010977,negative regulation of neuron projection development;GO:1903422,negative regulation of synaptic vesicle recycling;GO:2000463…	mmu:56216,path:mmu04130,SNARE interactions in vesicular transport;mmu:56216,path:mmu04721,Synaptic vesicle cycle
Q8C2Q8_MOUSE	Q8C2Q8	Atp5c1	ATP synthase subunit gamma	3087.6	7367.6	3439.1	8376.5	9838.5	10536.4	10840.5	11355.3	10906.9	4631.43	9583.8	11034.2	4631.43	9583.8	11034.2	2.06929	0.03065	1	2.38247	0.009769	1	1.15134	0.091727	0	GO:0045261,proton-transporting ATP synthase complex	GO:0046933,proton-transporting ATP synthase activity	GO:0015986,ATP synthesis coupled proton transport
KC1G1_MOUSE	Q8BTH8	Csnk1g1	Casein kinase I isoform gamma-1	1550.4	1576.7	1701.4	1668.2	1514.7	1539.9	1359.8	1429.2	1390.7	1609.5	1574.27	1393.23	1609.5	1574.27	1393.23	0.978109	0.624489	0	0.865631	0.013008	0	0.885005	0.024696	0	GO:0005737,cytoplasm;GO:0005829,cytosol;GO:0005634,nucleus;GO:0005886,plasma membrane	GO:0005524,ATP binding;GO:0004674,protein serine/threonine kinase activity	GO:0018105,peptidyl-serine phosphorylation;GO:0090263,positive regulation of canonical Wnt signaling pathway;GO:0046777,protein autophosphorylation;GO:0006468,protein phosphorylation;GO:0016055,Wnt signaling pathway	mmu:214897,path:mmu04340,Hedgehog signaling pathway
A0A1B0GRA5_MOUSE	A0A1B0GRA5	Stim1	Stromal interaction molecule 1	897.5	909	950.5	947.7	1682.7	1925	1529.7	1592	1988.3	919	1518.47	1703.33	919	1518.47	1703.33	1.6523	0.111307	0	1.85346	0.005589	1	1.12175	0.602097	0	GO:0032541,cortical endoplasmic reticulum;GO:0005783,endoplasmic reticulum;GO:0030426,growth cone;GO:0030176,integral component of endoplasmic reticulum membrane;GO:0005887,integral component of plasma membrane;GO:0005874,microtubule;GO:0005886,plasma membrane;GO:0044853,plasma membrane raft;GO:0032991,protein-containing complex;GO:0033017,sarcoplasmic reticulum membrane	GO:0005246,calcium channel regulator activity;GO:0005509,calcium ion binding;GO:0042802,identical protein binding;GO:0051010,microtubule plus-end binding;GO:0002020,protease binding;GO:0015279,store-operated calcium channel activity	GO:0032237,activation of store-operated calcium channel activity;GO:0006812,cation transport;GO:0006874,cellular calcium ion homeostasis;GO:0005513,detection of calcium ion;GO:0070166,enamel mineralization;GO:0014902,myotube differentiation;GO:0045762,positive regulation of adenylate cyclase activity;GO:0045766,positive regulation of angiogenesis;GO:0051924,regulation of calcium ion transport;GO:…	mmu:20866,path:mmu04020,Calcium signaling pathway;mmu:20866,path:mmu04611,Platelet activation
F6W7I2_MOUSE	F6W7I2	Dhps	Deoxyhypusine synthase (Fragment)	683.2	636.4	696.3	718.3	655.8	697.3	610	573	613.4	671.967	690.467	598.8	671.967	690.467	598.8	1.02753	0.513609	0	0.891116	0.030531	0	0.86724	0.015088	0	GO:0005737,cytoplasm	GO:0034038,deoxyhypusine synthase activity;GO:0042802,identical protein binding	GO:0008612,peptidyl-lysine modification to peptidyl-hypusine;GO:0042593,glucose homeostasis;GO:0042102,positive regulation of T cell proliferation;GO:0046203,spermidine catabolic process;GO:0008216,spermidine metabolic process
MLEC_MOUSE	Q6ZQI3	Mlec	Malectin	530.3	525.7	650.7	601.4	507.1	612	527.9	685	545.6	568.9	573.5	586.167	568.9	573.5	586.167	1.00809	0.934743	0	1.03035	0.80176	0	1.02209	0.842684	0	GO:0005783,endoplasmic reticulum;GO:0005789,endoplasmic reticulum membrane;GO:0016021,integral component of membrane	GO:0030246,carbohydrate binding;GO:0019899,enzyme binding	GO:0005975,carbohydrate metabolic process
ETHE1_MOUSE	Q9DCM0	Ethe1	Persulfide dioxygenase ETHE1, mitochondrial	296.9	1007	452.3	1128.6	996.1	1175.2	1781.5	1998.7	1657.7	585.4	1099.97	1812.63	585.4	1099.97	1812.63	1.879	0.081417	0	3.0964	0.006659	1	1.6479	0.003251	1	GO:0005737,cytoplasm;GO:0005759,mitochondrial matrix;GO:0005739,mitochondrion;GO:0005654,nucleoplasm	GO:0016788,hydrolase activity;GO:0005506,iron ion binding;GO:0050313,sulfur dioxygenase activity	GO:0006749,glutathione metabolic process;GO:0070813,hydrogen sulfide metabolic process	mmu:66071,path:mmu00920,Sulfur metabolism
CISD1_MOUSE	Q91WS0	Cisd1	CDGSH iron-sulfur domain-containing protein 1	1441.6	1862.1	1533.7	2140.5	1870.1	2038.8	1862.9	1902	1822.7	1612.47	2016.47	1862.53	1612.47	2016.47	1862.53	1.25055	0.054482	0	1.15508	0.126	0	0.923662	0.134091	0	GO:0032473,cytoplasmic side of mitochondrial outer membrane;GO:0016021,integral component of membrane;GO:0005741,mitochondrial outer membrane;GO:0005739,mitochondrion	GO:0051537,2 iron;GO:0042802,identical protein binding;GO:0005506,iron ion binding	GO:0043457,regulation of cellular respiration
A2AEX6_MOUSE	A2AEX6	Fhl1	Four and a half LIM domains protein 1	642.8	690.5	627.9	691.3	1827.3	1976.7	1573.6	1797.4	1494.1	653.733	1498.43	1621.7	653.733	1498.43	1621.7	2.29212	0.106144	0	2.48068	0.000476	1	1.08226	0.781686	0	GO:0005829,cytosol;GO:0005634,nucleus;GO:0005886,plasma membrane;GO:0005737,cytoplasm	GO:0046872,metal ion binding;GO:0044325,ion channel binding	GO:0007517,muscle organ development;GO:0030308,negative regulation of cell growth;GO:2000134,negative regulation of G1/S transition of mitotic cell cycle;GO:0010972,negative regulation of G2/M transition of mitotic cell cycle;GO:0043268,positive regulation of potassium ion transport;GO:0003254,regulation of membrane depolarization;GO:1901016,regulation of potassium ion transmembrane transporter a…	mmu:14199,path:mmu04630,Jak-STAT signaling pathway
PP1G_MOUSE	P63087	Ppp1cc	Serine/threonine-protein phosphatase PP1-gamma catalytic subunit	731.1	746.1	699.4	773	744.3	767	649.8	661.9	614.2	725.533	761.433	641.967	725.533	761.433	641.967	1.04948	0.092479	0	0.88482	0.013611	0	0.843103	0.002054	0	GO:0000164,protein phosphatase type 1 complex;GO:0032154,cleavage furrow;GO:0000777,condensed chromosome kinetochore;GO:0005737,cytoplasm;GO:0043197,dendritic spine;GO:0098978,glutamatergic synapse;GO:0030496,midbody;GO:0005741,mitochondrial outer membrane;GO:0005739,mitochondrion;GO:0000784,nuclear chromosome;GO:0016607,nuclear speck;GO:0005730,nucleolus;GO:0005634,nucleus;GO:0098794,postsynapse…	GO:0046872,metal ion binding;GO:0004722,protein serine/threonine phosphatase activity;GO:0005521,lamin binding;GO:0016791,phosphatase activity;GO:0008022,protein C-terminus binding;GO:0019904,protein domain specific binding;GO:0019901,protein kinase binding;GO:0047485,protein N-terminus binding;GO:0008157,protein phosphatase 1 binding;GO:0019903,protein phosphatase binding;GO:0044877,protein-cont…	GO:0007049,cell cycle;GO:0051301,cell division;GO:0032922,circadian regulation of gene expression;GO:0043153,entrainment of circadian clock by photoperiod;GO:0005977,glycogen metabolic process;GO:0030182,neuron differentiation;GO:0060252,positive regulation of glial cell proliferation;GO:0006470,protein dephosphorylation;GO:0042752,regulation of circadian rhythm;GO:0046822,regulation of nucleocyt…	mmu:19047,path:mmu03015,mRNA surveillance pathway;mmu:19047,path:mmu04390,Hippo signaling pathway;mmu:19047,path:mmu04024,cAMP signaling pathway;mmu:19047,path:mmu04022,cGMP-PKG signaling pathway;mmu:19047,path:mmu04114,Oocyte meiosis;mmu:19047,path:mmu04218,Cellular senescence;mmu:19047,path:mmu04510,Focal adhesion;mmu:19047,path:mmu04810,Regulation of actin cytoskeleton;mmu:19047,path:mmu04611,…
A0A1W2P729_MOUSE	A0A1W2P729	Cnpy2	Protein canopy homolog 2 (Fragment)	196.8	1185.1	299.9	1238.7	1141.2	1190.9	1059.4	1212.5	986.6	560.6	1190.27	1086.17	560.6	1190.27	1086.17	2.1232	0.116194	0	1.93751	0.176544	0	0.912541	0.22321	0	GO:0005783,endoplasmic reticulum		GO:0010629,negative regulation of gene expression;GO:0045716,positive regulation of low-density lipoprotein particle receptor biosynthetic process;GO:0010988,regulation of low-density lipoprotein particle clearance
B0QZN5_MOUSE	B0QZN5	Vamp2	Synaptobrevin-2	1470.8	1574.8	1496.4	1652.2	3520.6	3837.2	3452.6	3111	3312.9	1514	3003.33	3292.17	1514	3003.33	3292.17	1.98371	0.094494	0	2.17448	6.9e-05	1	1.09617	0.696555	0	GO:0030136,clathrin-coated vesicle;GO:0005737,cytoplasm;GO:0031410,cytoplasmic vesicle;GO:0030659,cytoplasmic vesicle membrane;GO:0030285,integral component of synaptic vesicle membrane;GO:0043231,intracellular membrane-bounded organelle;GO:0043229,intracellular organelle;GO:0016020,membrane;GO:0043005,neuron projection;GO:0044306,neuron projection terminus;GO:0048471,perinuclear region of cytopl…	GO:0048306,calcium-dependent protein binding;GO:0005516,calmodulin binding;GO:0042802,identical protein binding;GO:0044325,ion channel binding;GO:0017022,myosin binding;GO:0005543,phospholipid binding;GO:0008022,protein C-terminus binding;GO:0044877,protein-containing complex binding;GO:0005484,SNAP receptor activity;GO:0000149,SNARE binding;GO:0019905,syntaxin binding;GO:0017075,syntaxin-1 bindi…	GO:0017156,calcium-ion regulated exocytosis;GO:0032869,cellular response to insulin stimulus;GO:0043308,eosinophil degranulation;GO:0098967,exocytic insertion of neurotransmitter receptor to postsynaptic membrane;GO:0043001,Golgi to plasma membrane protein transport;GO:0046879,hormone secretion;GO:0060291,long-term synaptic potentiation;GO:0061025,membrane fusion;GO:0090316,positive regulation of…	mmu:22318,path:mmu04130,SNARE interactions in vesicular transport;mmu:22318,path:mmu04911,Insulin secretion;mmu:22318,path:mmu04970,Salivary secretion;mmu:22318,path:mmu04962,Vasopressin-regulated water reabsorption;mmu:22318,path:mmu04721,Synaptic vesicle cycle
SMCA2_MOUSE	Q6DIC0	Smarca2	Probable global transcription activator SNF2L2	762.6	1119.1	927.3	1099.5	1029.7	811.9	743.2	915.5	816.2	936.333	980.367	824.967	936.333	980.367	824.967	1.04703	0.759936	0	0.881061	0.385718	0	0.841488	0.195051	0	GO:0016514,SWI/SNF complex;GO:0045111,intermediate filament cytoskeleton;GO:0005654,nucleoplasm;GO:0043231,intracellular membrane-bounded organelle;GO:0071565,nBAF complex;GO:0071564,npBAF complex;GO:0000790,nuclear chromatin;GO:0005634,nucleus	GO:0016887,ATPase activity;GO:0042393,histone binding;GO:0005524,ATP binding;GO:0003682,chromatin binding;GO:0003713,transcription coactivator activity;GO:0003677,DNA binding;GO:0008094,DNA-dependent ATPase activity;GO:0004386,helicase activity;GO:0000976,transcription regulatory region sequence-specific DNA binding	GO:0006338,chromatin remodeling;GO:0006355,regulation of transcription;GO:0030308,negative regulation of cell growth;GO:0008285,negative regulation of cell population proliferation;GO:0045892,negative regulation of transcription;GO:0045944,positive regulation of transcription by RNA polymerase II;GO:0007286,spermatid development;GO:0035887,aortic smooth muscle cell differentiation;GO:0043044,ATP-…	mmu:67155,path:mmu04714,Thermogenesis;mmu:67155,path:mmu05225,Hepatocellular carcinoma
A0A087WS40_MOUSE	A0A087WS40	Cacna1c	Voltage-dependent L-type calcium channel subunit alpha	527.2	527.8	549.3	553.8	479.3	535.5	460.2	495	464.6	534.767	522.867	473.267	534.767	522.867	473.267	0.977747	0.640105	0	0.884997	0.009433	0	0.905138	0.11764	0	GO:0005891,voltage-gated calcium channel complex;GO:0005737,cytoplasm;GO:1990454,L-type voltage-gated calcium channel complex;GO:0014069,postsynaptic density;GO:0002095,caveolar macromolecular signaling complex;GO:0009986,cell surface;GO:0030425,dendrite;GO:0043198,dendritic shaft;GO:0098978,glutamatergic synapse;GO:0016021,integral component of membrane;GO:0005887,integral component of plasma me…	GO:0005245,voltage-gated calcium channel activity;GO:0051393,alpha-actinin binding;GO:0005516,calmodulin binding;GO:0008331,high voltage-gated calcium channel activity;GO:0086056,voltage-gated calcium channel activity involved in AV node cell action potential;GO:0019899,enzyme binding;GO:0044325,ion channel binding;GO:0046872,metal ion binding;GO:0019904,protein domain specific binding;GO:0051721…	GO:0034765,regulation of ion transmembrane transport;GO:0061577,calcium ion transmembrane transport via high voltage-gated calcium channel;GO:0043010,camera-type eye development;GO:0035115,embryonic forelimb morphogenesis;GO:0007507,heart development;GO:0002520,immune system development;GO:0098912,membrane depolarization during atrial cardiac muscle cell action potential;GO:0007204,positive regul…	mmu:12288,path:mmu04010,MAPK signaling pathway;mmu:12288,path:mmu04020,Calcium signaling pathway;mmu:12288,path:mmu04024,cAMP signaling pathway;mmu:12288,path:mmu04022,cGMP-PKG signaling pathway;mmu:12288,path:mmu04911,Insulin secretion;mmu:12288,path:mmu04929,GnRH secretion;mmu:12288,path:mmu04912,GnRH signaling pathway;mmu:12288,path:mmu04921,Oxytocin signaling pathway;mmu:12288,path:mmu04935,G…
Q7M6W1_MOUSE	Q7M6W1	Rtn1	Reticulon	4075.6	4104.7	4066.4	3334.8	3370.5	3585.5	3501.8	3614.4	3379.3	4082.23	3430.27	3498.5	4082.23	3430.27	3498.5	0.840292	0.001184	0	0.857006	0.001062	0	1.01989	0.546232	0	GO:0005783,endoplasmic reticulum;GO:0005789,endoplasmic reticulum membrane;GO:0000139,Golgi membrane;GO:0016021,integral component of membrane;GO:0005790,smooth endoplasmic reticulum
SNG1_MOUSE	O55100	Syngr1	Synaptogyrin-1	3311.2	3406.3	3800	3860.8	3325.8	3504.8	3316.4	3560.5	3371.3	3505.83	3563.8	3416.07	3505.83	3563.8	3416.07	1.01653	0.80262	0	0.974395	0.6192	0	0.958546	0.443077	0	GO:0016021,integral component of membrane;GO:0030285,integral component of synaptic vesicle membrane;GO:0042470,melanosome;GO:0031594,neuromuscular junction;GO:0008021,synaptic vesicle;GO:0030672,synaptic vesicle membrane		GO:1990830,cellular response to leukemia inhibitory factor;GO:0006605,protein targeting;GO:0045055,regulated exocytosis;GO:0048169,regulation of long-term neuronal synaptic plasticity;GO:0048172,regulation of short-term neuronal synaptic plasticity;GO:0048499,synaptic vesicle membrane organization
RAB7A_MOUSE	P51150	Rab7a	Ras-related protein Rab-7a	10297.5	12989	9253	12928.5	12115.1	11713.5	12082.3	12692.1	12002.7	10846.5	12252.4	12259	10846.5	12252.4	12259	1.12962	0.295389	0	1.13023	0.280876	0	1.00054	0.988053	0	GO:0097208,alveolar lamellar body;GO:0098993,anchored component of synaptic vesicle membrane;GO:0000421,autophagosome membrane;GO:0005737,cytoplasm;GO:0031410,cytoplasmic vesicle;GO:0005829,cytosol;GO:0012505,endomembrane system;GO:0005768,endosome;GO:0010008,endosome membrane;GO:0032419,extrinsic component of lysosome membrane;GO:0005794,Golgi apparatus;GO:0005770,late endosome;GO:0031902,late e…	GO:0019003,GDP binding;GO:0005525,GTP binding;GO:0003924,GTPase activity;GO:0048365,Rac GTPase binding;GO:1905394,retromer complex binding	GO:0000045,autophagosome assembly;GO:0045453,bone resorption;GO:0045022,early endosome to late endosome transport;GO:0008333,endosome to lysosome transport;GO:0007174,epidermal growth factor catabolic process;GO:0051650,establishment of vesicle localization;GO:0006886,intracellular protein transport;GO:0016042,lipid catabolic process;GO:0061724,lipophagy;GO:1903542,negative regulation of exosomal…	mmu:19349,path:mmu04144,Endocytosis;mmu:19349,path:mmu04145,Phagosome;mmu:19349,path:mmu04140,Autophagy - animal;mmu:19349,path:mmu04137,Mitophagy - animal;mmu:19349,path:mmu05132,Salmonella infection;mmu:19349,path:mmu05152,Tuberculosis;mmu:19349,path:mmu05146,Amoebiasis
A0A6I8MX30_MOUSE	A0A6I8MX30	Trhde	Thyrotropin-releasing hormone-degrading ectoenzyme	880.2	817.6	976.6	916.8	806.9	803.6	716.5	759.5	748.8	891.467	842.433	741.6	891.467	842.433	741.6	0.944997	0.45511	0	0.831888	0.035486	-1	0.880307	0.062591	0	GO:0005737,cytoplasm;GO:0016021,integral component of membrane;GO:0005886,plasma membrane	GO:0070006,metalloaminopeptidase activity;GO:0042277,peptide binding;GO:0008270,zinc ion binding	GO:0043171,peptide catabolic process;GO:0006508,proteolysis
SELO_MOUSE	Q9DBC0	Selenoo	Protein adenylyltransferase SelO, mitochondrial	1106.2	1843.9	1142.7	1838.4	1760.6	1810.4	1600.7	1828.2	1656.5	1364.27	1803.13	1695.13	1364.27	1803.13	1695.13	1.32169	0.142862	0	1.24252	0.255644	0	0.940104	0.208702	0	GO:0005739,mitochondrion	GO:0005524,ATP binding;GO:0046872,metal ion binding;GO:0070733,protein adenylyltransferase activity	GO:0018117,protein adenylylation
RHOB_MOUSE	P62746	Rhob	Rho-related GTP-binding protein RhoB	1385.4	1344.4	1243.6	1311.2	3401.3	3545	3628.6	3883.4	3407.6	1324.47	2752.5	3639.87	1324.47	2752.5	3639.87	2.0782	0.11949	0	2.74817	8.7e-05	1	1.32239	0.293718	0	GO:0032154,cleavage furrow;GO:0005737,cytoplasm;GO:0005829,cytosol;GO:0005769,early endosome;GO:0010008,endosome membrane;GO:0005770,late endosome;GO:0031902,late endosome membrane;GO:0016020,membrane;GO:0005634,nucleus;GO:0005886,plasma membrane	GO:0019003,GDP binding;GO:0005525,GTP binding;GO:0003924,GTPase activity	GO:0001525,angiogenesis;GO:0006915,apoptotic process;GO:0007155,cell adhesion;GO:0030154,cell differentiation;GO:0016477,cell migration;GO:0070301,cellular response to hydrogen peroxide;GO:0071479,cellular response to ionizing radiation;GO:0008333,endosome to lysosome transport;GO:0061154,endothelial tube morphogenesis;GO:0006886,intracellular protein transport;GO:0000281,mitotic cytokinesis;GO:0…	mmu:11852,path:mmu05132,Salmonella infection
LZTL1_MOUSE	Q9JHQ5	Lztfl1	Leucine zipper transcription factor-like protein 1	1056	1962	1190.7	2129.3	1931.4	2038.7	2382.7	2689	2414.9	1402.9	2033.13	2495.53	1402.9	2033.13	2495.53	1.44924	0.093852	0	1.77884	0.021573	1	1.22743	0.014845	1	GO:0005737,cytoplasm;GO:0005829,cytosol	GO:0042802,identical protein binding;GO:0044877,protein-containing complex binding	GO:1903568,negative regulation of protein localization to ciliary membrane;GO:1903565,negative regulation of protein localization to cilium
Q3UHC1_MOUSE	Q3UHC1	Rapgef1	Rap guanine nucleotide exchange factor (GEF) 1	671.8	677.6	718	756	684	709.5	625.3	690.8	596	689.133	716.5	637.367	689.133	716.5	637.367	1.03971	0.34529	0	0.924881	0.176365	0	0.889556	0.086993	0	GO:0005737,cytoplasm;GO:0005769,early endosome;GO:0043231,intracellular membrane-bounded organelle;GO:0048471,perinuclear region of cytoplasm;GO:0030670,phagocytic vesicle membrane;GO:0032991,protein-containing complex;GO:0005829,cytosol	GO:0005085,guanyl-nucleotide exchange factor activity;GO:0017034,Rap guanyl-nucleotide exchange factor activity	GO:0090630,activation of GTPase activity;GO:0001568,blood vessel development;GO:0098609,cell-cell adhesion;GO:0071320,cellular response to cAMP;GO:1990090,cellular response to nerve growth factor stimulus;GO:0061028,establishment of endothelial barrier;GO:0090090,negative regulation of canonical Wnt signaling pathway;GO:0070373,negative regulation of ERK1 and ERK2 cascade;GO:2000178,negative regu…	mmu:107746,path:mmu04015,Rap1 signaling pathway;mmu:107746,path:mmu04510,Focal adhesion;mmu:107746,path:mmu04910,Insulin signaling pathway;mmu:107746,path:mmu04722,Neurotrophin signaling pathway;mmu:107746,path:mmu05211,Renal cell carcinoma
TTC19_MOUSE	Q8CC21	Ttc19	Tetratricopeptide repeat protein 19, mitochondrial	534.5	554.5	564.4	574.1	546.1	558.4	472	516.9	548	551.133	559.533	512.3	551.133	559.533	512.3	1.01524	0.521113	0	0.929539	0.177339	0	0.915584	0.114815	0	GO:0005743,mitochondrial inner membrane;GO:0005739,mitochondrion;GO:0070469,respirasome		GO:0034551,mitochondrial respiratory chain complex III assembly;GO:0055114,oxidation-reduction process
AKAP1_MOUSE	O08715	Akap1	A-kinase anchor protein 1, mitochondrial	526	957.9	623.8	970.9	910.3	876.1	807.4	938.6	851.5	702.567	919.1	865.833	702.567	919.1	865.833	1.3082	0.180532	0	1.23239	0.297145	0	0.942045	0.324683	0	GO:0005783,endoplasmic reticulum;GO:0016021,integral component of membrane;GO:0005811,lipid droplet;GO:0030061,mitochondrial crista;GO:0005741,mitochondrial outer membrane;GO:0005739,mitochondrion;GO:0031594,neuromuscular junction;GO:0045211,postsynaptic membrane	GO:0048487,beta-tubulin binding;GO:0008017,microtubule binding;GO:0060090,molecular adaptor activity;GO:0034237,protein kinase A regulatory subunit binding;GO:0019901,protein kinase binding;GO:0030346,protein phosphatase 2B binding;GO:0019903,protein phosphatase binding;GO:0003723,RNA binding	GO:0140374,antiviral innate immune response;GO:0010614,negative regulation of cardiac muscle hypertrophy;GO:0035308,negative regulation of protein dephosphorylation;GO:0042308,negative regulation of protein import into nucleus;GO:0010738,regulation of protein kinase A signaling
TCTP_MOUSE	P63028	Tpt1	Translationally-controlled tumor protein	3717.1	3436.6	2694.5	3642.7	3690.5	3486.6	3610.4	3222.3	3467.9	3282.73	3606.6	3433.53	3282.73	3606.6	3433.53	1.09866	0.356794	0	1.04594	0.667184	0	0.952014	0.250785	0	GO:0005737,cytoplasm;GO:0005881,cytoplasmic microtubule;GO:0005829,cytosol;GO:0005615,extracellular space;GO:0005771,multivesicular body;GO:0005654,nucleoplasm;GO:0005634,nucleus;GO:0000922,spindle pole	GO:0005509,calcium ion binding;GO:0008134,transcription factor binding	GO:2000384,negative regulation of ectoderm development;GO:1902230,negative regulation of intrinsic apoptotic signaling pathway in response to DNA damage;GO:0007283,spermatogenesis;GO:0019827,stem cell population maintenance
AGK_MOUSE	Q9ESW4	Agk	Acylglycerol kinase, mitochondrial	2896.7	4348.9	2986.2	4865.9	4267	4656	4232.7	4549.1	4107.5	3410.6	4596.3	4296.43	3410.6	4596.3	4296.43	1.34765	0.077318	0	1.25973	0.143602	0	0.934759	0.243119	0	GO:0031305,integral component of mitochondrial inner membrane;GO:0043231,intracellular membrane-bounded organelle;GO:0016020,membrane;GO:0005743,mitochondrial inner membrane;GO:0005758,mitochondrial intermembrane space;GO:0031966,mitochondrial membrane;GO:0005739,mitochondrion;GO:0042721,TIM22 mitochondrial import inner membrane insertion complex	GO:0047620,acylglycerol kinase activity;GO:0005524,ATP binding;GO:0001729,ceramide kinase activity;GO:0004143,diacylglycerol kinase activity;GO:0102773,dihydroceramide kinase activity;GO:0001727,lipid kinase activity;GO:0003951,NAD+ kinase activity	GO:0046513,ceramide biosynthetic process;GO:0046486,glycerolipid metabolic process;GO:0046834,lipid phosphorylation;GO:0016310,phosphorylation;GO:0045039,protein insertion into mitochondrial inner membrane;GO:0006665,sphingolipid metabolic process	mmu:69923,path:mmu00561,Glycerolipid metabolism
2A5G_MOUSE	Q60996	Ppp2r5c	Serine/threonine-protein phosphatase 2A 56 kDa regulatory subunit gamma isoform	331.5	776.9	363.1	872.3	774.1	811.9	731.5	785.3	730.6	490.5	819.433	749.133	490.5	819.433	749.133	1.67061	0.087824	0	1.52729	0.148244	0	0.914209	0.106302	0	GO:0000159,protein phosphatase type 2A complex;GO:0000775,chromosome;GO:0005829,cytosol;GO:0005794,Golgi apparatus;GO:0005654,nucleoplasm;GO:0005634,nucleus	GO:0019888,protein phosphatase regulator activity;GO:0072542,protein phosphatase activator activity	GO:0007165,signal transduction;GO:0008285,negative regulation of cell population proliferation;GO:0043161,proteasome-mediated ubiquitin-dependent protein catabolic process;GO:0006470,protein dephosphorylation;GO:0031952,regulation of protein autophosphorylation	mmu:26931,path:mmu03015,mRNA surveillance pathway;mmu:26931,path:mmu04071,Sphingolipid signaling pathway;mmu:26931,path:mmu04151,PI3K-Akt signaling pathway;mmu:26931,path:mmu04152,AMPK signaling pathway;mmu:26931,path:mmu04114,Oocyte meiosis;mmu:26931,path:mmu04261,Adrenergic signaling in cardiomyocytes;mmu:26931,path:mmu04728,Dopaminergic synapse;mmu:26931,path:mmu05165,Human papillomavirus infe…
ARF4_MOUSE	P61750	Arf4	ADP-ribosylation factor 4	1242.6	2853	1276.9	3100.3	3098.3	3130.4	2675.8	2903.4	2560.1	1790.83	3109.67	2713.1	1790.83	3109.67	2713.1	1.73644	0.068037	0	1.51499	0.163241	0	0.872473	0.017366	0	GO:0016021,integral component of membrane;GO:0005737,cytoplasm;GO:0005829,cytosol;GO:0043197,dendritic spine;GO:0098978,glutamatergic synapse;GO:0005794,Golgi apparatus;GO:0005886,plasma membrane;GO:0032587,ruffle membrane	GO:0005525,GTP binding;GO:0005154,epidermal growth factor receptor binding	GO:0031584,activation of phospholipase D activity;GO:0045176,apical protein localization;GO:0007420,brain development;GO:0016477,cell migration;GO:0060996,dendritic spine development;GO:0007173,epidermal growth factor receptor signaling pathway;GO:0045197,establishment or maintenance of epithelial cell apical/basal polarity;GO:0006886,intracellular protein transport;GO:0007612,learning;GO:0043066…
H3BJY2_MOUSE	H3BJY2	Asap1	Arf-GAP with SH3 domain, ANK repeat and PH domain-containing protein 1	1032.4	996.7	1150.8	1115.2	994.9	1053.5	1065.2	938.5	942.2	1059.97	1054.53	981.967	1059.97	1054.53	981.967	0.994874	0.929985	0	0.926413	0.279873	0	0.931186	0.251755	0	GO:0031253,cell projection membrane;GO:0005829,cytosol;GO:0043197,dendritic spine;GO:0002102,podosome	GO:0005096,GTPase activator activity;GO:0046872,metal ion binding;GO:0005547,phosphatidylinositol-3;GO:0005546,phosphatidylinositol-4;GO:0001786,phosphatidylserine binding	GO:0060271,cilium assembly;GO:0061000,negative regulation of dendritic spine development;GO:1903527,positive regulation of membrane tubulation;GO:0071803,positive regulation of podosome assembly	mmu:13196,path:mmu04144,Endocytosis;mmu:13196,path:mmu04666,Fc gamma R-mediated phagocytosis
TOLIP_MOUSE	Q9QZ06	Tollip	Toll-interacting protein	602.2	608.8	636.7	669.4	610	651.1	1015.6	1094.9	1011.2	615.9	643.5	1040.57	615.9	643.5	1040.57	1.04481	0.249431	0	1.68951	0.00013	1	1.61704	0.000254	1	GO:0005737,cytoplasm;GO:0016604,nuclear body;GO:0048471,perinuclear region of cytoplasm;GO:0032991,protein-containing complex	GO:0005150,interleukin-1;GO:0019900,kinase binding;GO:0032183,SUMO binding;GO:0035325,Toll-like receptor binding;GO:0043130,ubiquitin binding;GO:0031624,ubiquitin conjugating enzyme binding;GO:0031625,ubiquitin protein ligase binding	GO:0006914,autophagy;GO:0030855,epithelial cell differentiation;GO:0006954,inflammatory response;GO:0045087,innate immune response;GO:0070498,interleukin-1-mediated signaling pathway;GO:0016310,phosphorylation;GO:0033235,positive regulation of protein sumoylation;GO:0036010,protein localization to endosome;GO:0007165,signal transduction;GO:0006511,ubiquitin-dependent protein catabolic process	mmu:54473,path:mmu04620,Toll-like receptor signaling pathway
LUC7L_MOUSE	Q9CYI4	Luc7l	Putative RNA-binding protein Luc7-like 1	554	455.2	566.6	543.1	515.3	528.2	503.8	572.5	476.3	525.267	528.867	517.533	525.267	528.867	517.533	1.00685	0.925416	0	0.985277	0.872945	0	0.978571	0.722283	0	GO:0005685,U1 snRNP;GO:0005634,nucleus;GO:0071004,U2-type prespliceosome	GO:0003729,mRNA binding;GO:0042802,identical protein binding;GO:0050733,RS domain binding	GO:0006376,mRNA splice site selection;GO:0045843,negative regulation of striated muscle tissue development
E9Q6H8_MOUSE	E9Q6H8	Plekha5	Pleckstrin homology domain-containing, family A member 5	801.6	817.3	828.9	944.5	1226.1	1285.5	1474.6	1701.2	1511.3	815.933	1152.03	1562.37	815.933	1152.03	1562.37	1.41192	0.033322	1	1.91482	0.000454	1	1.35618	0.031532	1	GO:0005829,cytosol;GO:0098978,glutamatergic synapse;GO:0016021,integral component of membrane;GO:0005654,nucleoplasm;GO:0014069,postsynaptic density	GO:0080025,phosphatidylinositol-3;GO:0032266,phosphatidylinositol-3-phosphate binding;GO:0070273,phosphatidylinositol-4-phosphate binding;GO:0010314,phosphatidylinositol-5-phosphate binding	GO:0061458,reproductive system development
PUF60_MOUSE	Q3UEB3	Puf60	Poly(U)-binding-splicing factor PUF60	558.1	554.9	641.7	625.5	1411.4	1453.7	1249	1289	1231.6	584.9	1163.53	1256.53	584.9	1163.53	1256.53	1.98929	0.09944	0	2.14829	3.5e-05	1	1.07993	0.747707	0	GO:0030054,cell junction;GO:0005654,nucleoplasm	GO:0003677,DNA binding;GO:0042802,identical protein binding;GO:0003723,RNA binding	GO:0000380,alternative mRNA splicing;GO:0006915,apoptotic process;GO:0006376,mRNA splice site selection;GO:0000381,regulation of alternative mRNA splicing	mmu:67959,path:mmu03040,Spliceosome
CMBL_MOUSE	Q8R1G2	Cmbl	Carboxymethylenebutenolidase homolog	1271.9	1375.5	1412.6	1377.3	1275.5	1250.8	1808.9	2247.2	2083.1	1353.33	1301.2	2046.4	1353.33	1301.2	2046.4	0.961478	0.41359	0	1.51212	0.006749	1	1.5727	0.005062	1	GO:0005829,cytosol	GO:0016787,hydrolase activity
1433T_MOUSE	P68254	Ywhaq	14-3-3 protein theta	2933.8	2831.9	3077.6	3176.6	2946.7	3069.3	2634.3	2864.4	2653.4	2947.77	3064.2	2717.37	2947.77	3064.2	2717.37	1.0395	0.298032	0	0.921839	0.087945	0	0.886811	0.025002	0	GO:0005737,cytoplasm;GO:0005829,cytosol;GO:0032991,protein-containing complex;GO:0045202,synapse	GO:0071889,14-3-3 protein binding;GO:0042802,identical protein binding;GO:0044325,ion channel binding;GO:0008022,protein C-terminus binding;GO:0019904,protein domain specific binding;GO:0047485,protein N-terminus binding	GO:0034766,negative regulation of ion transmembrane transport;GO:0045892,negative regulation of transcription;GO:0006605,protein targeting;GO:0007165,signal transduction;GO:0007264,small GTPase mediated signal transduction	mmu:22630,path:mmu04390,Hippo signaling pathway;mmu:22630,path:mmu04151,PI3K-Akt signaling pathway;mmu:22630,path:mmu04110,Cell cycle;mmu:22630,path:mmu04114,Oocyte meiosis;mmu:22630,path:mmu05203,Viral carcinogenesis;mmu:22630,path:mmu05161,Hepatitis B;mmu:22630,path:mmu05160,Hepatitis C
NB5R1_MOUSE	Q9DB73	Cyb5r1	NADH-cytochrome b5 reductase 1	1616.3	2184.4	1762.2	2362.6	2212.5	2255.7	3109.2	3036.1	2913.9	1854.3	2276.93	3019.73	1854.3	2276.93	3019.73	1.22792	0.074342	0	1.6285	0.002909	1	1.32623	0.000508	1	GO:0016021,integral component of membrane;GO:0005739,mitochondrion	GO:0016491,oxidoreductase activity;GO:0004128,cytochrome-b5 reductase activity;GO:0071949,FAD binding	GO:0016126,sterol biosynthetic process	mmu:72017,path:mmu00520,Amino sugar and nucleotide sugar metabolism
BCLF1_MOUSE	Q8K019	Bclaf1	Bcl-2-associated transcription factor 1	2532.1	2452.7	2525.3	2595.5	2498.5	2604.8	2346.6	2400.3	2310.4	2503.37	2566.27	2352.43	2503.37	2566.27	2352.43	1.02513	0.212424	0	0.939708	0.014349	0	0.916675	0.007551	0	GO:0005634,nucleus;GO:0005737,cytoplasm;GO:0016592,mediator complex;GO:0016607,nuclear speck;GO:0005654,nucleoplasm	GO:0003677,DNA binding;GO:0003712,transcription coregulator activity	GO:0006915,apoptotic process;GO:0045892,negative regulation of transcription;GO:2001022,positive regulation of response to DNA damage stimulus;GO:1990830,cellular response to leukemia inhibitory factor;GO:0043065,positive regulation of apoptotic process;GO:2000144,positive regulation of DNA-templated transcription;GO:2001244,positive regulation of intrinsic apoptotic signaling pathway;GO:0045944,…
ABHDA_MOUSE	Q6PE15	Abhd10	Mycophenolic acid acyl-glucuronide esterase, mitochondrial	890.9	1770.8	912.4	1847.1	1675.8	1769.3	1613.8	1706.1	1667.9	1191.37	1764.07	1662.6	1191.37	1764.07	1662.6	1.48071	0.12323	0	1.39554	0.180704	0	0.942481	0.145828	0	GO:0005829,cytosol;GO:0005739,mitochondrion	GO:0004553,hydrolase activity;GO:0102390,mycophenolic acid acyl-glucuronide esterase activity	GO:0019391,glucuronoside catabolic process
A0A087WQF0_MOUSE	A0A087WQF0	Plppr2	Phospholipid phosphatase-related protein type 2	509.4	507.2	542.7	559	451.2	466.5	605.8	700.6	660.2	519.767	492.233	655.533	519.767	492.233	655.533	0.947028	0.482201	0	1.26121	0.010335	1	1.33175	0.01981	1	GO:0016021,integral component of membrane;GO:0005887,integral component of plasma membrane	GO:0008195,phosphatidate phosphatase activity;GO:0042577,lipid phosphatase activity;GO:0016791,phosphatase activity	GO:0006644,phospholipid metabolic process;GO:0046839,phospholipid dephosphorylation;GO:0007165,signal transduction
FXR1_MOUSE	Q61584	Fxr1	Fragile X mental retardation syndrome-related protein 1	527.1	545	509.8	546.3	507.1	526	467.7	511.9	475.5	527.3	526.467	485.033	527.3	526.467	485.033	0.99842	0.958937	0	0.919843	0.067688	0	0.921299	0.079414	0	GO:0030424,axon;GO:0043034,costamere;GO:0005737,cytoplasm;GO:0036464,cytoplasmic ribonucleoprotein granule;GO:0005829,cytosol;GO:0030425,dendrite;GO:1902737,dendritic filopodium;GO:0043197,dendritic spine;GO:0044326,dendritic spine neck;GO:0098978,glutamatergic synapse;GO:0030426,growth cone;GO:0043025,neuronal cell body;GO:0005634,nucleus;GO:0048471,perinuclear region of cytoplasm;GO:0005844,pol…	GO:0003729,mRNA binding;GO:0002151,G-quadruplex RNA binding;GO:0003730,mRNA 3'-UTR binding;GO:0046982,protein heterodimerization activity;GO:0042803,protein homodimerization activity;GO:0033592,RNA strand annealing activity;GO:0045182,translation regulator activity	GO:0006417,regulation of translation;GO:0030154,cell differentiation;GO:0007517,muscle organ development;GO:0017148,negative regulation of translation;GO:2000637,positive regulation of gene silencing by miRNA;GO:0001934,positive regulation of protein phosphorylation;GO:2001022,positive regulation of response to DNA damage stimulus;GO:0045727,positive regulation of translation;GO:0000381,regulatio…	mmu:14359,path:mmu03013,RNA transport
Q8CAD1_MOUSE	Q8CAD1	Araf	Non-specific serine/threonine protein kinase	610.8	664.2	644.2	670.2	652.7	638	613	638.5	621.3	639.733	653.633	624.267	639.733	653.633	624.267	1.02173	0.486351	0	0.975823	0.421636	0	0.955072	0.070015	0	GO:0005829,cytosol;GO:0005739,mitochondrion	GO:0005524,ATP binding;GO:0004672,protein kinase activity;GO:0046872,metal ion binding;GO:0004674,protein serine/threonine kinase activity;GO:0004709,MAP kinase kinase kinase activity	GO:0035556,intracellular signal transduction;GO:0043066,negative regulation of apoptotic process;GO:0033138,positive regulation of peptidyl-serine phosphorylation;GO:0006468,protein phosphorylation;GO:0032434,regulation of proteasomal ubiquitin-dependent protein catabolic process;GO:0032006,regulation of TOR signaling	mmu:11836,path:mmu04010,MAPK signaling pathway;mmu:11836,path:mmu04012,ErbB signaling pathway;mmu:11836,path:mmu04068,FoxO signaling pathway;mmu:11836,path:mmu04810,Regulation of actin cytoskeleton;mmu:11836,path:mmu04650,Natural killer cell mediated cytotoxicity;mmu:11836,path:mmu04910,Insulin signaling pathway;mmu:11836,path:mmu04914,Progesterone-mediated oocyte maturation;mmu:11836,path:mmu049…
TMX1_MOUSE	Q8VBT0	Tmx1	Thioredoxin-related transmembrane protein 1	888	826.2	927.6	867	871.6	848.8	775.3	909.1	730.5	880.6	862.467	804.967	880.6	862.467	804.967	0.979408	0.581948	0	0.914112	0.284314	0	0.933331	0.347748	0	GO:0005789,endoplasmic reticulum membrane;GO:0016021,integral component of membrane	GO:0015036,disulfide oxidoreductase activity	GO:0045454,cell redox homeostasis;GO:0034976,response to endoplasmic reticulum stress
A2AVR6_MOUSE	A2AVR6	Acot11	Acyl-coenzyme A thioesterase 11	975	1949.9	1045.8	2229.7	2019.3	2143.6	2010.8	2103.5	1953.2	1323.57	2130.87	2022.5	1323.57	2130.87	2022.5	1.60994	0.065008	0	1.52807	0.092063	0	0.949144	0.222717	0	GO:0005829,cytosol;GO:0005737,cytoplasm;GO:0005759,mitochondrial matrix	GO:0016790,thiolester hydrolase activity;GO:0008289,lipid binding;GO:0047617,acyl-CoA hydrolase activity;GO:0052689,carboxylic ester hydrolase activity;GO:0000062,fatty-acyl-CoA binding;GO:0052816,long-chain acyl-CoA hydrolase activity;GO:0036042,long-chain fatty acyl-CoA binding;GO:0102991,myristoyl-CoA hydrolase activity;GO:0016290,palmitoyl-CoA hydrolase activity	GO:0006637,acyl-CoA metabolic process;GO:0006631,fatty acid metabolic process;GO:0035556,intracellular signal transduction;GO:0120163,negative regulation of cold-induced thermogenesis;GO:0009409,response to cold;GO:0009266,response to temperature stimulus
SYTC_MOUSE	Q9D0R2	Tars1	Threonine--tRNA ligase 1, cytoplasmic	2676.4	2941.5	2680.3	3274.2	3897.8	4285.6	3575.1	3896.4	3509.7	2766.07	3819.2	3660.4	2766.07	3819.2	3660.4	1.38073	0.02663	1	1.32332	0.003805	1	0.958421	0.643648	0	GO:0015629,actin cytoskeleton;GO:0005737,cytoplasm;GO:0005829,cytosol	GO:0004812,aminoacyl-tRNA ligase activity;GO:0005524,ATP binding;GO:0042802,identical protein binding;GO:0004829,threonine-tRNA ligase activity;GO:0008270,zinc ion binding	GO:0006435,threonyl-tRNA aminoacylation;GO:0006418,tRNA aminoacylation for protein translation	mmu:110960,path:mmu00970,Aminoacyl-tRNA biosynthesis
ROA1_MOUSE	P49312	Hnrnpa1	Heterogeneous nuclear ribonucleoprotein A1	1272.2	4350.8	1287.8	3847.8	4243.7	3624.3	4039	3848.1	3948.4	2303.6	3905.27	3945.17	2303.6	3905.27	3945.17	1.69529	0.198216	0	1.71261	0.184548	0	1.01022	0.843368	0	GO:0071013,catalytic step 2 spliceosome;GO:0005737,cytoplasm;GO:0005654,nucleoplasm;GO:0005634,nucleus;GO:1990904,ribonucleoprotein complex;GO:0005681,spliceosomal complex	GO:0098505,G-rich strand telomeric DNA binding;GO:0035198,miRNA binding;GO:0036002,pre-mRNA binding;GO:0019904,protein domain specific binding;GO:0061752,telomeric repeat-containing RNA binding;GO:0003729,mRNA binding;GO:0003723,RNA binding;GO:0003697,single-stranded DNA binding	GO:0042149,cellular response to glucose starvation;GO:1903936,cellular response to sodium arsenite;GO:0051170,import into nucleus;GO:0032211,negative regulation of telomere maintenance via telomerase;GO:0051168,nuclear export;GO:0032212,positive regulation of telomere maintenance via telomerase;GO:0000381,regulation of alternative mRNA splicing;GO:0000380,alternative mRNA splicing;GO:0051028,mRNA…	mmu:15382,path:mmu03040,Spliceosome
Q3TYE5_MOUSE	Q3TYE5	Lsamp	Limbic system-associated membrane protein	3764.4	6349.7	3355.8	6462.8	6008.9	6424.1	8984.3	11027.7	9135.4	4489.97	6298.6	9715.8	4489.97	6298.6	9715.8	1.40282	0.129219	0	2.16389	0.010303	1	1.54253	0.007103	1	GO:0016021,integral component of membrane;GO:0005829,cytosol;GO:0031225,anchored component of membrane;GO:0005886,plasma membrane		GO:0007155,cell adhesion;GO:0035641,locomotory exploration behavior
CK5P3_MOUSE	Q99LM2	Cdk5rap3	CDK5 regulatory subunit-associated protein 3	460	923.1	431.2	1043.2	958.7	974	867	985.5	835.9	604.767	991.967	896.133	604.767	991.967	896.133	1.64025	0.074544	0	1.48178	0.15364	0	0.903391	0.141803	0	GO:0005813,centrosome;GO:0005737,cytoplasm;GO:0005829,cytosol;GO:0043231,intracellular membrane-bounded organelle;GO:0005874,microtubule;GO:0005730,nucleolus;GO:0005634,nucleus;GO:0032991,protein-containing complex	GO:0030332,cyclin binding;GO:0097371,MDM2/MDM4 family protein binding;GO:0051019,mitogen-activated protein kinase binding;GO:0051059,NF-kappaB binding;GO:0019901,protein kinase binding;GO:0044877,protein-containing complex binding;GO:0044389,ubiquitin-like protein ligase binding	GO:0030262,apoptotic nuclear changes;GO:0008283,cell population proliferation;GO:0030968,endoplasmic reticulum unfolded protein response;GO:0007095,mitotic G2 DNA damage checkpoint;GO:0044818,mitotic G2/M transition checkpoint;GO:1903363,negative regulation of cellular protein catabolic process;GO:0043407,negative regulation of MAP kinase activity;GO:0032088,negative regulation of NF-kappaB trans…
DCNL1_MOUSE	Q9QZ73	Dcun1d1	DCN1-like protein 1	1367.8	1291.6	1297.7	1464.5	1378.9	1514	1389.7	1523.4	1239.9	1319.03	1452.47	1384.33	1319.03	1452.47	1384.33	1.10116	0.045265	0	1.04951	0.487368	0	0.953091	0.495189	0	GO:0005829,cytosol;GO:0005654,nucleoplasm;GO:0000151,ubiquitin ligase complex	GO:0097602,cullin family protein binding;GO:0031624,ubiquitin conjugating enzyme binding;GO:0032182,ubiquitin-like protein binding	GO:2000436,positive regulation of protein neddylation;GO:0051443,positive regulation of ubiquitin-protein transferase activity;GO:0045116,protein neddylation
VMA5A_MOUSE	Q99KC8	Vwa5a	von Willebrand factor A domain-containing protein 5A	709.3	671.3	735.5	764.6	708.4	774.7	647.3	723.4	581.7	705.367	749.233	650.8	705.367	749.233	650.8	1.06219	0.189682	0	0.922641	0.291864	0	0.868621	0.098295	0	GO:0062023,collagen-containing extracellular matrix;GO:0005654,nucleoplasm
HID1_MOUSE	Q8R1F6	Hid1	Protein HID1	772.5	769.7	784.8	827.7	769.7	850.3	704.3	844.2	708.4	775.667	815.9	752.3	775.667	815.9	752.3	1.05187	0.17517	0	0.969875	0.639606	0	0.922049	0.287275	0	GO:0005737,cytoplasm;GO:0005881,cytoplasmic microtubule;GO:0005829,cytosol;GO:0090498,extrinsic component of Golgi membrane;GO:0005794,Golgi apparatus;GO:0005797,Golgi medial cisterna;GO:0000138,Golgi trans cisterna;GO:0016020,membrane
RHG17_MOUSE	Q3UIA2	Arhgap17	Rho GTPase-activating protein 17	360.6	419.1	392	474.2	431.8	390.7	367.8	464.9	392.1	390.567	432.233	408.267	390.567	432.233	408.267	1.10668	0.229914	0	1.04532	0.62735	0	0.944552	0.56093	0	GO:0005737,cytoplasm;GO:0005923,bicellular tight junction;GO:0005829,cytosol;GO:0005654,nucleoplasm;GO:0005886,plasma membrane	GO:0005096,GTPase activator activity;GO:0048365,Rac GTPase binding;GO:0017124,SH3 domain binding	GO:0007165,signal transduction;GO:0007015,actin filament organization;GO:0017156,calcium-ion regulated exocytosis;GO:0032956,regulation of actin cytoskeleton organization;GO:0035020,regulation of Rac protein signal transduction	mmu:70497,path:mmu04530,Tight junction
F8WI57_MOUSE	F8WI57	Actl6b	Actin-like protein 6B	734.3	1648.5	765.6	1894.5	3142.1	3118.2	2709.2	3144.4	2925.6	1049.47	2718.27	2926.4	1049.47	2718.27	2926.4	2.59014	0.030615	1	2.78846	0.00446	1	1.07657	0.654162	0	GO:0071565,nBAF complex;GO:0035267,NuA4 histone acetyltransferase complex;GO:0005634,nucleus;GO:0016514,SWI/SNF complex	GO:0003682,chromatin binding	GO:0043044,ATP-dependent chromatin remodeling;GO:0006333,chromatin assembly or disassembly;GO:0006338,chromatin remodeling;GO:0016358,dendrite development;GO:0043967,histone H4 acetylation;GO:0007399,nervous system development;GO:0042551,neuron maturation;GO:0006357,regulation of transcription by RNA polymerase II;GO:0021510,spinal cord development	mmu:83766,path:mmu04714,Thermogenesis;mmu:83766,path:mmu05225,Hepatocellular carcinoma
E9PVU7_MOUSE	E9PVU7	Pde4d	Phosphodiesterase	1015.4	975.4	1097.1	1070.9	1023.6	1028.1	954.7	994.4	953.9	1029.3	1040.87	967.667	1029.3	1040.87	967.667	1.01124	0.780764	0	0.940121	0.182187	0	0.929674	0.022096	0	GO:0016324,apical plasma membrane;GO:0034704,calcium channel complex;GO:0005813,centrosome;GO:0005829,cytosol;GO:0005891,voltage-gated calcium channel complex	GO:0004114,3';GO:0046872,metal ion binding;GO:0004115,3';GO:0051117,ATPase binding;GO:0030552,cAMP binding;GO:0008144,drug binding;GO:0044325,ion channel binding;GO:0097110,scaffold protein binding	GO:0007165,signal transduction;GO:0007568,aging;GO:0006198,cAMP catabolic process;GO:0071872,cellular response to epinephrine stimulus;GO:0071222,cellular response to lipopolysaccharide;GO:0061028,establishment of endothelial barrier;GO:0050900,leukocyte migration;GO:0035264,multicellular organism growth;GO:0043951,negative regulation of cAMP-mediated signaling;GO:0045822,negative regulation of h…	mmu:238871,path:mmu00230,Purine metabolism;mmu:238871,path:mmu04024,cAMP signaling pathway;mmu:238871,path:mmu04928,Parathyroid hormone synthesis, secretion and action;mmu:238871,path:mmu05032,Morphine addiction
E0CZD9_MOUSE	E0CZD9	Zfpl1	Zinc finger protein-like 1 (Fragment)	485.6	506.3	538.8	533.7	495.3	524.1	421.8	452.5	414.3	510.233	517.7	429.533	510.233	517.7	429.533	1.01463	0.718675	0	0.841837	0.014142	0	0.829695	0.005812	-1	GO:0005794,Golgi apparatus;GO:0016021,integral component of membrane	GO:0046872,metal ion binding	GO:0016192,vesicle-mediated transport
RANG_MOUSE	P34022	Ranbp1	Ran-specific GTPase-activating protein	6388.5	6442.5	5698.8	6076	6404.7	5988.8	5705.2	5428.8	5770.8	6176.6	6156.5	5634.93	6176.6	6156.5	5634.93	0.996746	0.944402	0	0.912303	0.106907	0	0.915282	0.033753	0	GO:1904115,axon cytoplasm;GO:0005813,centrosome;GO:0005737,cytoplasm;GO:0005829,cytosol;GO:0005643,nuclear pore;GO:0005634,nucleus;GO:0032838,plasma membrane bounded cell projection cytoplasm	GO:0005092,GDP-dissociation inhibitor activity;GO:0005096,GTPase activator activity;GO:0008536,Ran GTPase binding	GO:0046907,intracellular transport;GO:0035690,cellular response to drug;GO:0072750,cellular response to leptomycin B;GO:0046604,positive regulation of mitotic centrosome separation;GO:0010976,positive regulation of neuron projection development;GO:0051592,response to calcium ion;GO:0007051,spindle organization	mmu:19385,path:mmu05203,Viral carcinogenesis;mmu:19385,path:mmu05166,Human T-cell leukemia virus 1 infection
VISL1_MOUSE	P62761	Vsnl1	Visinin-like protein 1	9925.4	9941.4	10221.5	10295.2	12092.2	12982.9	11936.7	11706.3	10867	10029.4	11790.1	11503.3	10029.4	11790.1	11503.3	1.17555	0.091508	0	1.14696	0.012174	0	0.975677	0.754084	0	GO:0005829,cytosol;GO:0016020,membrane	GO:0005509,calcium ion binding	GO:0046676,negative regulation of insulin secretion;GO:0045921,positive regulation of exocytosis;GO:0035774,positive regulation of insulin secretion involved in cellular response to glucose stimulus
AT1B1_MOUSE	P14094	Atp1b1	Sodium/potassium-transporting ATPase subunit beta-1	3043.3	2634.9	3008.6	3088.3	7286.5	7625.6	9747.6	9845.3	11262.2	2895.6	6000.13	10285	2895.6	6000.13	10285	2.07215	0.101449	0	3.55195	0.000128	1	1.71413	0.049612	1	GO:0005890,sodium;GO:0016324,apical plasma membrane;GO:0016323,basolateral plasma membrane;GO:0005901,caveola;GO:0014704,intercalated disc;GO:0016328,lateral plasma membrane;GO:0016020,membrane;GO:0043209,myelin sheath;GO:0031090,organelle membrane;GO:0005886,plasma membrane;GO:0042383,sarcolemma;GO:0036126,sperm flagellum;GO:0030315,T-tubule	GO:0005524,ATP binding;GO:0001671,ATPase activator activity;GO:0016887,ATPase activity;GO:0051117,ATPase binding;GO:0030955,potassium ion binding;GO:0008022,protein C-terminus binding;GO:0046982,protein heterodimerization activity;GO:0019901,protein kinase binding;GO:0031402,sodium ion binding;GO:0005391,sodium	GO:0006813,potassium ion transport;GO:0006814,sodium ion transport;GO:0046034,ATP metabolic process;GO:0060048,cardiac muscle contraction;GO:0098655,cation transmembrane transport;GO:0007155,cell adhesion;GO:0006874,cellular calcium ion homeostasis;GO:0030007,cellular potassium ion homeostasis;GO:0006883,cellular sodium ion homeostasis;GO:0086009,membrane repolarization;GO:0030001,metal ion trans…	mmu:11931,path:mmu04024,cAMP signaling pathway;mmu:11931,path:mmu04022,cGMP-PKG signaling pathway;mmu:11931,path:mmu04911,Insulin secretion;mmu:11931,path:mmu04918,Thyroid hormone synthesis;mmu:11931,path:mmu04919,Thyroid hormone signaling pathway;mmu:11931,path:mmu04925,Aldosterone synthesis and secretion;mmu:11931,path:mmu04260,Cardiac muscle contraction;mmu:11931,path:mmu04261,Adrenergic signa…
MAGD1_MOUSE	Q9QYH6	Maged1	Melanoma-associated antigen D1	434.9	430.3	469	482.6	464.8	452.6	398.9	450.7	409.2	444.733	466.667	419.6	444.733	466.667	419.6	1.04932	0.217374	0	0.943487	0.277063	0	0.899143	0.05975	0	GO:0000785,chromatin;GO:0005829,cytosol;GO:0005634,nucleus;GO:0005886,plasma membrane;GO:0032991,protein-containing complex	GO:0042802,identical protein binding;GO:0003713,transcription coactivator activity	GO:0032922,circadian regulation of gene expression;GO:0050680,negative regulation of epithelial cell proliferation;GO:1900181,negative regulation of protein localization to nucleus;GO:0045892,negative regulation of transcription;GO:2001235,positive regulation of apoptotic signaling pathway;GO:0090190,positive regulation of branching involved in ureteric bud morphogenesis;GO:0043406,positive regul…	mmu:94275,path:mmu04722,Neurotrophin signaling pathway
NACAD_MOUSE	Q5SWP3	Nacad	NAC-alpha domain-containing protein 1	772	904.4	844.6	859.3	832.1	809.4	740.7	866.8	721.4	840.333	833.6	776.3	840.333	833.6	776.3	0.991987	0.877243	0	0.9238	0.342647	0	0.931262	0.296955	0	GO:0005854,nascent polypeptide-associated complex;GO:0005737,cytoplasm;GO:0005634,nucleus	GO:0051082,unfolded protein binding	GO:0006612,protein targeting to membrane
PLCE_MOUSE	Q9D1E8	Agpat5	1-acyl-sn-glycerol-3-phosphate acyltransferase epsilon	591.9	578.9	610.9	626.4	576.6	602.6	535	541.5	517	593.9	601.867	531.167	593.9	601.867	531.167	1.01341	0.665915	0	0.894371	0.006081	0	0.882532	0.011871	0	GO:0012505,endomembrane system;GO:0005783,endoplasmic reticulum;GO:0005789,endoplasmic reticulum membrane;GO:0016021,integral component of membrane;GO:0005739,mitochondrion;GO:0005635,nuclear envelope	GO:0016746,transferase activity;GO:0003841,1-acylglycerol-3-phosphate O-acyltransferase activity	GO:0006639,acylglycerol metabolic process;GO:0016024,CDP-diacylglycerol biosynthetic process;GO:0002244,hematopoietic progenitor cell differentiation;GO:0036149,phosphatidylinositol acyl-chain remodeling	mmu:52123,path:mmu00561,Glycerolipid metabolism;mmu:52123,path:mmu00564,Glycerophospholipid metabolism;mmu:52123,path:mmu04072,Phospholipase D signaling pathway
A0A0M3HEQ0_MOUSE	A0A0M3HEQ0	Txnrd2	Thioredoxin-disulfide reductase	430.2	465.4	482.3	517.3	842	835.5	742.6	830.5	710.3	459.3	731.6	761.133	459.3	731.6	761.133	1.59286	0.065689	0	1.65716	0.00151	1	1.04037	0.806763	0	GO:0030424,axon;GO:0005737,cytoplasm;GO:0005829,cytosol;GO:0030425,dendrite;GO:0005739,mitochondrion;GO:0043025,neuronal cell body	GO:0050660,flavin adenine dinucleotide binding;GO:0042803,protein homodimerization activity;GO:0044877,protein-containing complex binding;GO:0004791,thioredoxin-disulfide reductase activity;GO:0016668,oxidoreductase activity	GO:0045454,cell redox homeostasis;GO:0007507,heart development;GO:0030097,hemopoiesis;GO:0000305,response to oxygen radical	mmu:26462,path:mmu00450,Selenocompound metabolism;mmu:26462,path:mmu05200,Pathways in cancer;mmu:26462,path:mmu05225,Hepatocellular carcinoma
DOC11_MOUSE	A2AF47	Dock11	Dedicator of cytokinesis protein 11	669.7	663.5	717.3	709.6	626.7	636.3	549.5	674.8	595.1	683.5	657.533	606.467	683.5	657.533	606.467	0.962009	0.452231	0	0.887296	0.128991	0	0.922336	0.319954	0		GO:0005085,guanyl-nucleotide exchange factor activity;GO:0017048,Rho GTPase binding;GO:0005089,Rho guanyl-nucleotide exchange factor activity	GO:0007264,small GTPase mediated signal transduction;GO:0001782,B cell homeostasis;GO:0002315,marginal zone B cell differentiation;GO:0051491,positive regulation of filopodium assembly;GO:0043547,positive regulation of GTPase activity
RHOA_MOUSE	Q9QUI0	Rhoa	Transforming protein RhoA	419.8	441.8	421.8	448.6	410	472.4	1957.3	2106.3	1786.8	427.8	443.667	1950.13	427.8	443.667	1950.13	1.03709	0.461299	0	4.55852	8e-05	1	4.39549	8.9e-05	1	GO:0043296,apical junction complex;GO:0030424,axon;GO:0005938,cell cortex;GO:0071944,cell periphery;GO:0032154,cleavage furrow;GO:0005737,cytoplasm;GO:0005856,cytoskeleton;GO:0005829,cytosol;GO:0043197,dendritic spine;GO:0005768,endosome;GO:0031234,extrinsic component of cytoplasmic side of plasma membrane;GO:0098978,glutamatergic synapse;GO:0030027,lamellipodium;GO:0016020,membrane;GO:0030496,mi…	GO:0005525,GTP binding;GO:0003924,GTPase activity;GO:0019003,GDP binding;GO:0017022,myosin binding;GO:0019904,protein domain specific binding;GO:0051022,Rho GDP-dissociation inhibitor binding	GO:0007264,small GTPase mediated signal transduction;GO:0030036,actin cytoskeleton organization;GO:0031532,actin cytoskeleton reorganization;GO:0002363,alpha-beta T cell lineage commitment;GO:0030521,androgen receptor signaling pathway;GO:0001998,angiotensin-mediated vasoconstriction involved in regulation of systemic arterial blood pressure;GO:0043297,apical junction assembly;GO:0038027,apolipop…	mmu:11848,path:mmu04014,Ras signaling pathway;mmu:11848,path:mmu04015,Rap1 signaling pathway;mmu:11848,path:mmu04310,Wnt signaling pathway;mmu:11848,path:mmu04350,TGF-beta signaling pathway;mmu:11848,path:mmu04072,Phospholipase D signaling pathway;mmu:11848,path:mmu04071,Sphingolipid signaling pathway;mmu:11848,path:mmu04024,cAMP signaling pathway;mmu:11848,path:mmu04022,cGMP-PKG signaling pathwa…
ARPC2_MOUSE	Q9CVB6	Arpc2	Actin-related protein 2/3 complex subunit 2	10099.3	8603.9	8758.6	8757.2	8809.1	8922.7	8930.7	8123	8471.9	9153.93	8829.67	8508.53	9153.93	8829.67	8508.53	0.964576	0.534177	0	0.929495	0.289671	0	0.96363	0.250107	0	GO:0005885,Arp2/3 protein complex;GO:0005737,cytoplasm;GO:0061834,actin filament branch point;GO:0097440,apical dendrite;GO:0043679,axon terminus;GO:0031252,cell leading edge;GO:0009986,cell surface;GO:0061830,concave side of sperm head;GO:0043198,dendritic shaft;GO:0043197,dendritic spine;GO:0005768,endosome;GO:0031941,filamentous actin;GO:0005925,focal adhesion;GO:0098978,glutamatergic synapse;…	GO:0003779,actin binding;GO:0051015,actin filament binding;GO:0051117,ATPase binding;GO:0035254,glutamate receptor binding;GO:0044877,protein-containing complex binding;GO:0005200,structural constituent of cytoskeleton	GO:0030041,actin filament polymerization;GO:0034314,Arp2/3 complex-mediated actin nucleation;GO:0071364,cellular response to epidermal growth factor stimulus;GO:0036120,cellular response to platelet-derived growth factor stimulus;GO:0072752,cellular response to rapamycin;GO:2000251,positive regulation of actin cytoskeleton reorganization;GO:0030838,positive regulation of actin filament polymeriza…	mmu:76709,path:mmu04144,Endocytosis;mmu:76709,path:mmu04810,Regulation of actin cytoskeleton;mmu:76709,path:mmu04666,Fc gamma R-mediated phagocytosis;mmu:76709,path:mmu05132,Salmonella infection;mmu:76709,path:mmu05100,Bacterial invasion of epithelial cells
A0A494BAK4_MOUSE	A0A494BAK4	Ergic1	Endoplasmic reticulum-Golgi intermediate compartment protein 1	978.7	960.6	1012.4	982.2	2627.8	2715.4	2454.2	2569.2	2425.6	983.9	2108.47	2483	983.9	2108.47	2483	2.14297	0.116882	0	2.52363	5e-06	1	1.17763	0.543924	0	GO:0016021,integral component of membrane;GO:0030134,COPII-coated ER to Golgi transport vesicle;GO:0005783,endoplasmic reticulum;GO:0005793,endoplasmic reticulum-Golgi intermediate compartment;GO:0033116,endoplasmic reticulum-Golgi intermediate compartment membrane;GO:0030176,integral component of endoplasmic reticulum membrane;GO:0030173,integral component of Golgi membrane;GO:0043231,intracellu…		GO:0006888,endoplasmic reticulum to Golgi vesicle-mediated transport;GO:0006890,retrograde vesicle-mediated transport
A0A3Q4EI12_MOUSE	A0A3Q4EI12	Rab18	Ras-related protein Rab-18	4812.9	4573.9	4321	4598.4	4405.3	4934.8	5204.9	5167.2	5267.6	4569.27	4646.17	5213.23	4569.27	4646.17	5213.23	1.01683	0.73278	0	1.14093	0.011325	0	1.12205	0.022729	0	GO:0016324,apical plasma membrane;GO:0012505,endomembrane system;GO:0071782,endoplasmic reticulum tubular network;GO:0005794,Golgi apparatus;GO:0005811,lipid droplet;GO:0045202,synapse	GO:0005525,GTP binding;GO:0003924,GTPase activity;GO:0019003,GDP binding	GO:0007420,brain development;GO:0071786,endoplasmic reticulum tubular network organization;GO:0001654,eye development;GO:0051170,import into nucleus;GO:0006886,intracellular protein transport;GO:0034389,lipid droplet organization;GO:0032482,Rab protein signal transduction
NUCB1_MOUSE	Q02819	Nucb1	Nucleobindin-1	1481.6	1627.5	1636.8	1767.6	2645.4	2654.2	2810	3414.3	2934.6	1581.97	2355.73	3052.97	1581.97	2355.73	3052.97	1.48912	0.060456	0	1.92986	0.001528	1	1.29597	0.114896	0	GO:0005801,cis-Golgi network;GO:0005737,cytoplasm;GO:0005769,early endosome;GO:0005793,endoplasmic reticulum-Golgi intermediate compartment;GO:0005576,extracellular region;GO:0005615,extracellular space;GO:0090498,extrinsic component of Golgi membrane;GO:0005794,Golgi apparatus;GO:0032580,Golgi cisterna membrane;GO:0005798,Golgi-associated vesicle;GO:0098547,lumenal side of Golgi membrane;GO:0005…	GO:0005509,calcium ion binding;GO:0003677,DNA binding;GO:0001965,G-protein alpha-subunit binding;GO:0005085,guanyl-nucleotide exchange factor activity	GO:1903533,regulation of protein targeting;GO:0072718,response to cisplatin;GO:0007264,small GTPase mediated signal transduction
B2RQ57_MOUSE	B2RQ57	Abl2	Tyrosine-protein kinase	824.5	704.4	726	780.6	789.2	784.9	732.7	609	642	751.633	784.9	661.233	751.633	784.9	661.233	1.04426	0.419964	0	0.879729	0.158881	0	0.842443	0.028929	0	GO:0015629,actin cytoskeleton;GO:0031410,cytoplasmic vesicle;GO:0043197,dendritic spine;GO:0098978,glutamatergic synapse;GO:0030027,lamellipodium;GO:0001891,phagocytic cup;GO:0098794,postsynapse	GO:0005524,ATP binding;GO:0004715,non-membrane spanning protein tyrosine kinase activity;GO:0000287,magnesium ion binding;GO:0030145,manganese ion binding;GO:0001784,phosphotyrosine residue binding;GO:0004713,protein tyrosine kinase activity	GO:0071300,cellular response to retinoic acid;GO:0007204,positive regulation of cytosolic calcium ion concentration;GO:0010976,positive regulation of neuron projection development;GO:0051353,positive regulation of oxidoreductase activity;GO:0010863,positive regulation of phospholipase C activity;GO:0030036,actin cytoskeleton organization;GO:0051017,actin filament bundle assembly;GO:0007015,actin …	mmu:11352,path:mmu04014,Ras signaling pathway;mmu:11352,path:mmu04012,ErbB signaling pathway;mmu:11352,path:mmu05416,Viral myocarditis
BIRC6_MOUSE	O88738	Birc6	Baculoviral IAP repeat-containing protein 6	895.2	911.9	819.1	869.5	838.3	810.6	713.3	932.3	808	875.4	839.467	817.867	875.4	839.467	817.867	0.958952	0.340547	0	0.934278	0.454585	0	0.974269	0.758665	0	GO:0005768,endosome;GO:0090543,Flemming body;GO:0016020,membrane;GO:0005815,microtubule organizing center;GO:0030496,midbody;GO:0005634,nucleus;GO:0000922,spindle pole;GO:0005802,trans-Golgi network	GO:0004842,ubiquitin-protein transferase activity;GO:0004869,cysteine-type endopeptidase inhibitor activity;GO:0061631,ubiquitin conjugating enzyme activity	GO:0006915,apoptotic process;GO:0032465,regulation of cytokinesis;GO:0007049,cell cycle;GO:0051301,cell division;GO:0060711,labyrinthine layer development;GO:0043066,negative regulation of apoptotic process;GO:2001237,negative regulation of extrinsic apoptotic signaling pathway;GO:0001890,placenta development;GO:0008284,positive regulation of cell population proliferation;GO:0016567,protein ubiqu…	mmu:12211,path:mmu04120,Ubiquitin mediated proteolysis;mmu:12211,path:mmu04215,Apoptosis - multiple species
Q6NZD2_MOUSE	Q6NZD2	Snx1	Sorting nexin-1	636.6	1467.8	636.9	1443.4	1406.9	1378.7	1835.2	2025.3	1869.2	913.767	1409.67	1909.9	913.767	1409.67	1909.9	1.5427	0.14863	0	2.09014	0.024488	1	1.35486	0.001239	1	GO:0005829,cytosol;GO:0031901,early endosome membrane;GO:0005764,lysosome;GO:0030905,retromer;GO:0030904,retromer complex;GO:0005737,cytoplasm;GO:0043197,dendritic spine;GO:0005769,early endosome;GO:0005768,endosome;GO:0010008,endosome membrane;GO:0098999,extrinsic component of postsynaptic endosome membrane;GO:0005794,Golgi apparatus;GO:0043231,intracellular membrane-bounded organelle;GO:0030027…	GO:0005154,epidermal growth factor receptor binding;GO:0005158,insulin receptor binding;GO:1990460,leptin receptor binding;GO:0035091,phosphatidylinositol binding;GO:0046982,protein heterodimerization activity;GO:0042803,protein homodimerization activity;GO:1990459,transferrin receptor binding;GO:0042802,identical protein binding	GO:0034498,early endosome to Golgi transport;GO:0006886,intracellular protein transport;GO:0072673,lamellipodium morphogenesis;GO:0045732,positive regulation of protein catabolic process;GO:0031623,receptor internalization;GO:0042147,retrograde transport;GO:0030512,negative regulation of transforming growth factor beta receptor signaling pathway;GO:0031175,neuron projection development	mmu:56440,path:mmu04144,Endocytosis
WASC5_MOUSE	Q8C2E7	Washc5	WASH complex subunit 5	660.9	662.1	740	717.6	644.8	668.3	619.6	686	591.9	687.667	676.9	632.5	687.667	676.9	632.5	0.984343	0.766261	0	0.919777	0.222853	0	0.934407	0.275826	0	GO:0005737,cytoplasm;GO:0005829,cytosol;GO:0005769,early endosome;GO:0005783,endoplasmic reticulum;GO:0005768,endosome;GO:0043005,neuron projection;GO:0043025,neuronal cell body;GO:0005654,nucleoplasm;GO:0071203,WASH complex	GO:0042802,identical protein binding	GO:0034629,cellular protein-containing complex localization;GO:0042632,cholesterol homeostasis;GO:0016197,endosomal transport;GO:0140285,endosome fission;GO:0006887,exocytosis;GO:0007040,lysosome organization;GO:0001556,oocyte maturation;GO:0006909,phagocytosis;GO:0040038,polar body extrusion after meiotic divisions;GO:0010976,positive regulation of neuron projection development;GO:0015031,protei…	mmu:223593,path:mmu04144,Endocytosis
TSN7_MOUSE	Q62283	Tspan7	Tetraspanin-7	532.9	498	667.4	610.9	501.4	520.3	542.4	570.4	501	566.1	544.2	537.933	566.1	544.2	537.933	0.961314	0.740622	0	0.950244	0.638133	0	0.988485	0.881183	0	GO:0005887,integral component of plasma membrane;GO:0016021,integral component of membrane			mmu:21912,path:mmu05202,Transcriptional misregulation in cancer
LAMA4_MOUSE	P97927	Lama4	Laminin subunit alpha-4	373.5	809	473	836.4	1175.4	1269	1117.3	1287.6	1175.2	551.833	1093.6	1193.37	551.833	1093.6	1193.37	1.98176	0.043616	1	2.16255	0.010398	1	1.09123	0.517129	0	GO:0005604,basement membrane;GO:0062023,collagen-containing extracellular matrix;GO:0005576,extracellular region;GO:0031594,neuromuscular junction;GO:0043083,synaptic cleft	GO:0005102,signaling receptor binding	GO:0001568,blood vessel development;GO:0050873,brown fat cell differentiation;GO:0007155,cell adhesion;GO:0120163,negative regulation of cold-induced thermogenesis;GO:0030155,regulation of cell adhesion;GO:0030334,regulation of cell migration;GO:0045995,regulation of embryonic development	mmu:16775,path:mmu04151,PI3K-Akt signaling pathway;mmu:16775,path:mmu04512,ECM-receptor interaction;mmu:16775,path:mmu04510,Focal adhesion;mmu:16775,path:mmu05200,Pathways in cancer;mmu:16775,path:mmu05222,Small cell lung cancer;mmu:16775,path:mmu05165,Human papillomavirus infection;mmu:16775,path:mmu05146,Amoebiasis;mmu:16775,path:mmu05145,Toxoplasmosis;mmu:16775,path:mmu05143,African trypanosom…
A0A1Y7VM56_MOUSE	A0A1Y7VM56	Sirt5	NAD-dependent protein deacylase sirtuin-5, mitochondrial	738.4	762.1	818	789.3	731.9	802.9	715	753.6	689	772.833	774.7	719.2	772.833	774.7	719.2	1.00242	0.956412	0	0.930602	0.149873	0	0.928359	0.125581	0	GO:0005829,cytosol;GO:0005743,mitochondrial inner membrane;GO:0005758,mitochondrial intermembrane space;GO:0005759,mitochondrial matrix;GO:0005739,mitochondrion;GO:0005634,nucleus	GO:0070403,NAD+ binding;GO:0061697,protein-glutaryllysine deglutarylase activity;GO:0036054,protein-malonyllysine demalonylase activity;GO:0036055,protein-succinyllysine desuccinylase activity;GO:0016740,transferase activity;GO:0008270,zinc ion binding;GO:0034979,NAD-dependent protein deacetylase activity	GO:0010667,negative regulation of cardiac muscle cell apoptotic process;GO:2000378,negative regulation of reactive oxygen species metabolic process;GO:0036047,peptidyl-lysine demalonylation;GO:0036049,peptidyl-lysine desuccinylation;GO:0006476,protein deacetylation;GO:0061698,protein deglutarylation;GO:0036046,protein demalonylation;GO:0036048,protein desuccinylation;GO:0010566,regulation of keto…	mmu:68346,path:mmu00760,Nicotinate and nicotinamide metabolism
A0A0R4J1Z3_MOUSE	A0A0R4J1Z3	Tmem33	Transmembrane protein 33	526.1	597.7	583.7	523.9	512.5	467.3	489.9	574.4	477.9	569.167	501.233	514.067	569.167	501.233	514.067	0.880644	0.071639	0	0.903192	0.215116	0	1.0256	0.731997	0	GO:0005783,endoplasmic reticulum;GO:0005789,endoplasmic reticulum membrane;GO:0030176,integral component of endoplasmic reticulum membrane;GO:0042470,melanosome;GO:0005635,nuclear envelope;GO:0016021,integral component of membrane		GO:0071786,endoplasmic reticulum tubular network organization;GO:0061024,membrane organization;GO:1903896,positive regulation of IRE1-mediated unfolded protein response;GO:1903899,positive regulation of PERK-mediated unfolded protein response;GO:1903371,regulation of endoplasmic reticulum tubular network organization;GO:0034976,response to endoplasmic reticulum stress
S2546_MOUSE	Q9CQS4	Slc25a46	Solute carrier family 25 member 46	443.9	474.6	512.8	521.2	475.8	484	429.1	451	443.6	477.1	493.667	441.233	477.1	493.667	441.233	1.03472	0.533413	0	0.924824	0.161921	0	0.893788	0.027038	0	GO:0016021,integral component of membrane;GO:0005741,mitochondrial outer membrane;GO:0005739,mitochondrion		GO:0000422,autophagy of mitochondrion;GO:0021702,cerebellar Purkinje cell differentiation;GO:0016358,dendrite development;GO:0031987,locomotion involved in locomotory behavior;GO:0090149,mitochondrial membrane fission;GO:0006839,mitochondrial transport;GO:0007005,mitochondrion organization;GO:0022011,myelination in peripheral nervous system;GO:0021554,optic nerve development;GO:0048936,peripheral…
NU214_MOUSE	Q80U93	Nup214	Nuclear pore complex protein Nup214	546.5	623	596.9	647.4	1032.3	542.8	503	518	553.6	588.8	740.833	524.867	588.8	740.833	524.867	1.25821	0.369585	0	0.891418	0.07703	0	0.708481	0.222289	0	GO:1990876,cytoplasmic side of nuclear pore;GO:0005635,nuclear envelope;GO:0005643,nuclear pore	GO:0005049,nuclear export signal receptor activity;GO:0008139,nuclear localization sequence binding;GO:0017056,structural constituent of nuclear pore	GO:0000278,mitotic cell cycle;GO:0006406,mRNA export from nucleus;GO:0006611,protein export from nucleus;GO:0006606,protein import into nucleus;GO:0051726,regulation of cell cycle;GO:0046822,regulation of nucleocytoplasmic transport;GO:0006405,RNA export from nucleus	mmu:227720,path:mmu03013,RNA transport
NOCT_MOUSE	O35710	Noct	Nocturnin	375.3	344.5	429.3	412.5	382.5	391.5	311.8	385.6	334.2	383.033	395.5	343.867	383.033	395.5	343.867	1.03255	0.660542	0	0.897746	0.301418	0	0.869448	0.093767	0	GO:0005737,cytoplasm;GO:0005739,mitochondrion;GO:0005634,nucleus;GO:0000932,P-body;GO:0048471,perinuclear region of cytoplasm	GO:0004535,poly(A)-specific ribonuclease activity;GO:0000175,3'-5'-exoribonuclease activity;GO:0046872,metal ion binding;GO:0003729,mRNA binding;GO:0019178,NADP phosphatase activity;GO:0102757,NADPH phosphatase activity	GO:0032922,circadian regulation of gene expression;GO:0007623,circadian rhythm;GO:0033962,cytoplasmic mRNA processing body assembly;GO:0000290,deadenylation-dependent decapping of nuclear-transcribed mRNA;GO:0048255,mRNA stabilization;GO:0006739,NADP metabolic process;GO:0010629,negative regulation of gene expression;GO:0045668,negative regulation of osteoblast differentiation;GO:0045600,positive…
APOA1_MOUSE	Q00623	Apoa1	Apolipoprotein A-I	2043	1964.3	2045.3	1970.6	2927.1	2770.2	2950	3938.5	4280	2017.53	2555.97	3722.83	2017.53	2555.97	3722.83	1.26688	0.144429	0	1.84524	0.012985	1	1.45653	0.078597	0	GO:0009986,cell surface;GO:0042627,chylomicron;GO:0031410,cytoplasmic vesicle;GO:0005829,cytosol;GO:0034365,discoidal high-density lipoprotein particle;GO:0030139,endocytic vesicle;GO:0005576,extracellular region;GO:0005615,extracellular space;GO:0034364,high-density lipoprotein particle;GO:0034363,intermediate-density lipoprotein particle;GO:0034362,low-density lipoprotein particle;GO:0005634,nu…	GO:0001540,amyloid-beta binding;GO:0034191,apolipoprotein A-I receptor binding;GO:0034190,apolipoprotein receptor binding;GO:0045499,chemorepellent activity;GO:0015485,cholesterol binding;GO:0120020,cholesterol transfer activity;GO:0019899,enzyme binding;GO:0031072,heat shock protein binding;GO:0008035,high-density lipoprotein particle binding;GO:0070653,high-density lipoprotein particle receptor…	GO:0030325,adrenal gland development;GO:0031100,animal organ regeneration;GO:0043534,blood vessel endothelial cell migration;GO:0006695,cholesterol biosynthetic process;GO:0033344,cholesterol efflux;GO:0042632,cholesterol homeostasis;GO:0070508,cholesterol import;GO:0008203,cholesterol metabolic process;GO:0030301,cholesterol transport;GO:0001935,endothelial cell proliferation;GO:0007186,G protei…	mmu:11806,path:mmu03320,PPAR signaling pathway;mmu:11806,path:mmu04975,Fat digestion and absorption;mmu:11806,path:mmu04979,Cholesterol metabolism;mmu:11806,path:mmu04977,Vitamin digestion and absorption;mmu:11806,path:mmu05143,African trypanosomiasis
ARL2_MOUSE	Q9D0J4	Arl2	ADP-ribosylation factor-like protein 2	597.2	665.8	654.6	630.2	601.5	597.9	578.5	654.8	553.7	639.2	609.867	595.667	639.2	609.867	595.667	0.954109	0.281377	0	0.931894	0.305809	0	0.976716	0.681015	0	GO:0005813,centrosome;GO:0005737,cytoplasm;GO:0005829,cytosol;GO:0005925,focal adhesion;GO:0005794,Golgi apparatus;GO:0016328,lateral plasma membrane;GO:0015630,microtubule cytoskeleton;GO:0005758,mitochondrial intermembrane space;GO:0005730,nucleolus;GO:0005654,nucleoplasm;GO:0005634,nucleus	GO:0019003,GDP binding;GO:0005525,GTP binding;GO:0003924,GTPase activity	GO:0015870,acetylcholine transport;GO:0070830,bicellular tight junction assembly;GO:0007098,centrosome cycle;GO:0051457,maintenance of protein location in nucleus;GO:0034260,negative regulation of GTPase activity;GO:0010811,positive regulation of cell-substrate adhesion;GO:0031116,positive regulation of microtubule polymerization;GO:0031113,regulation of microtubule polymerization
RUFY1_MOUSE	Q8BIJ7	Rufy1	RUN and FYVE domain-containing protein 1	1011.7	1116.3	1112.1	1176.8	1096.4	1068.3	985.8	1139.1	1008.8	1080.03	1113.83	1044.57	1080.03	1113.83	1044.57	1.0313	0.513332	0	0.967162	0.578376	0	0.937812	0.296562	0	GO:0005737,cytoplasm;GO:0031901,early endosome membrane;GO:0005768,endosome;GO:0043231,intracellular membrane-bounded organelle;GO:0016607,nuclear speck	GO:0008289,lipid binding;GO:0046872,metal ion binding;GO:0042169,SH2 domain binding;GO:0017124,SH3 domain binding	GO:0006897,endocytosis;GO:0015031,protein transport;GO:0030100,regulation of endocytosis;GO:0007264,small GTPase mediated signal transduction	mmu:216724,path:mmu04144,Endocytosis
ZDH17_MOUSE	Q80TN5	Zdhhc17	Palmitoyltransferase ZDHHC17	494.8	511	530.1	550.5	492.4	511.7	460.6	510.5	458.8	511.967	518.2	476.633	511.967	518.2	476.633	1.01218	0.769737	0	0.930985	0.148521	0	0.919786	0.15912	0	GO:0016235,aggresome;GO:0042995,cell projection;GO:0030659,cytoplasmic vesicle membrane;GO:0005794,Golgi apparatus;GO:0000139,Golgi membrane;GO:0030660,Golgi-associated vesicle membrane;GO:0016021,integral component of membrane;GO:0043231,intracellular membrane-bounded organelle;GO:0042734,presynaptic membrane	GO:0015095,magnesium ion transmembrane transporter activity;GO:0016409,palmitoyltransferase activity;GO:0042802,identical protein binding;GO:0019705,protein-cysteine S-myristoyltransferase activity;GO:0019706,protein-cysteine S-palmitoyltransferase activity;GO:0140439,protein-cysteine S-stearoyltransferase activity	GO:0042953,lipoprotein transport;GO:0018230,peptidyl-L-cysteine S-palmitoylation;GO:0018345,protein palmitoylation
GNPI1_MOUSE	O88958	Gnpda1	Glucosamine-6-phosphate isomerase 1	915.8	2014.8	929	2275	2104.6	2112.5	1994.4	2106.3	1919.9	1286.53	2164.03	2006.87	1286.53	2164.03	2006.87	1.68206	0.075811	0	1.5599	0.122033	0	0.927373	0.112725	0	GO:0005737,cytoplasm	GO:0004342,glucosamine-6-phosphate deaminase activity;GO:0042802,identical protein binding	GO:0005975,carbohydrate metabolic process;GO:0006044,N-acetylglucosamine metabolic process;GO:0007340,acrosome reaction;GO:0006002,fructose 6-phosphate metabolic process;GO:0046370,fructose biosynthetic process;GO:0006091,generation of precursor metabolites and energy;GO:0006043,glucosamine catabolic process;GO:0006041,glucosamine metabolic process;GO:0006046,N-acetylglucosamine catabolic process…	mmu:26384,path:mmu00520,Amino sugar and nucleotide sugar metabolism
G3UX92_MOUSE	G3UX92	Polr1c	DNA-directed RNA polymerases I and III subunit RPAC1	598.8	678.3	672.5	754.8	648.7	636.6	558.1	697.6	596.2	649.867	680.033	617.3	649.867	680.033	617.3	1.04642	0.543048	0	0.949887	0.541584	0	0.90775	0.325781	0	GO:0005654,nucleoplasm;GO:0005736,RNA polymerase I complex;GO:0005666,RNA polymerase III complex	GO:0003899,DNA-directed 5'-3' RNA polymerase activity;GO:0046983,protein dimerization activity;GO:0003677,DNA binding	GO:0006351,transcription;GO:0006360,transcription by RNA polymerase I;GO:0006366,transcription by RNA polymerase II;GO:0006383,transcription by RNA polymerase III	mmu:20016,path:mmu03020,RNA polymerase;mmu:20016,path:mmu04623,Cytosolic DNA-sensing pathway
RAB5C_MOUSE	P35278	Rab5c	Ras-related protein Rab-5C	4829.6	4715.7	4968	5032.9	4671.4	4849.9	4269.8	4670.9	4213.6	4837.77	4851.4	4384.77	4837.77	4851.4	4384.77	1.00282	0.919886	0	0.906362	0.048487	0	0.903815	0.058547	0	GO:0005768,endosome;GO:0005811,lipid droplet;GO:0098993,anchored component of synaptic vesicle membrane;GO:0031901,early endosome membrane;GO:0030139,endocytic vesicle;GO:0012505,endomembrane system;GO:0042470,melanosome;GO:0005886,plasma membrane	GO:0005525,GTP binding;GO:0003924,GTPase activity;GO:0019003,GDP binding	GO:0048227,plasma membrane to endosome transport;GO:0007032,endosome organization;GO:0006886,intracellular protein transport;GO:0032482,Rab protein signal transduction;GO:0030100,regulation of endocytosis	mmu:19345,path:mmu04014,Ras signaling pathway;mmu:19345,path:mmu04144,Endocytosis;mmu:19345,path:mmu04145,Phagosome;mmu:19345,path:mmu04962,Vasopressin-regulated water reabsorption;mmu:19345,path:mmu05132,Salmonella infection;mmu:19345,path:mmu05152,Tuberculosis;mmu:19345,path:mmu05146,Amoebiasis
A0A0R4J0U5_MOUSE	A0A0R4J0U5	Abcd2	ATP-binding cassette sub-family D member 2	353.5	380.8	380.2	433.6	382.1	394.7	347.7	432	367	371.5	403.467	382.233	371.5	403.467	382.233	1.08605	0.14908	0	1.02889	0.711694	0	0.947373	0.516034	0	GO:0016021,integral component of membrane;GO:0005777,peroxisome;GO:0005739,mitochondrion;GO:0005778,peroxisomal membrane	GO:0005524,ATP binding;GO:0016887,ATPase activity;GO:0042626,ATPase-coupled transmembrane transporter activity;GO:0042803,protein homodimerization activity	GO:0006635,fatty acid beta-oxidation;GO:0032000,positive regulation of fatty acid beta-oxidation;GO:0042760,very long-chain fatty acid catabolic process;GO:0043217,myelin maintenance;GO:1900016,negative regulation of cytokine production involved in inflammatory response;GO:1903427,negative regulation of reactive oxygen species biosynthetic process;GO:1990535,neuron projection maintenance;GO:20012…	mmu:26874,path:mmu02010,ABC transporters;mmu:26874,path:mmu04146,Peroxisome
E9PYH2_MOUSE	E9PYH2	Acot7	Cytosolic acyl coenzyme A thioester hydrolase	6281.2	9221.6	9232	10664.1	10938.7	11534	13319.7	10707.4	14265.9	8244.93	11045.6	12764.3	8244.93	11045.6	12764.3	1.33968	0.050871	0	1.54814	0.035481	1	1.1556	0.191476	0	GO:0005829,cytosol;GO:0005654,nucleoplasm;GO:0044297,cell body;GO:0005737,cytoplasm;GO:0043005,neuron projection	GO:0036042,long-chain fatty acyl-CoA binding;GO:0016290,palmitoyl-CoA hydrolase activity;GO:0042803,protein homodimerization activity;GO:0047617,acyl-CoA hydrolase activity;GO:0052689,carboxylic ester hydrolase activity;GO:0000062,fatty-acyl-CoA binding;GO:0042802,identical protein binding;GO:0102991,myristoyl-CoA hydrolase activity	GO:0015937,coenzyme A biosynthetic process;GO:0036116,long-chain fatty-acyl-CoA catabolic process;GO:0051792,medium-chain fatty acid biosynthetic process;GO:0036114,medium-chain fatty-acyl-CoA catabolic process;GO:1900535,palmitic acid biosynthetic process;GO:0006637,acyl-CoA metabolic process;GO:0009062,fatty acid catabolic process;GO:0006631,fatty acid metabolic process	mmu:70025,path:mmu00062,Fatty acid elongation;mmu:70025,path:mmu01040,Biosynthesis of unsaturated fatty acids
Q4KL52_MOUSE	Q4KL52	Zfyve19	Abscission/NoCut checkpoint regulator	490.8	560.8	486.4	553.8	520.8	512	468	539.1	480.1	512.667	528.867	495.733	512.667	528.867	495.733	1.0316	0.584206	0	0.96697	0.630947	0	0.93735	0.26178	0	GO:0005813,centrosome;GO:0032154,cleavage furrow;GO:0005737,cytoplasm;GO:0090543,Flemming body;GO:0030496,midbody	GO:0046872,metal ion binding;GO:0032266,phosphatidylinositol-3-phosphate binding	GO:0009838,abscission;GO:0051301,cell division;GO:0044878,mitotic cytokinesis checkpoint;GO:0032466,negative regulation of cytokinesis
D9HP81_MOUSE	D9HP81	Rims2	Regulating synaptic membrane exocytosis 2	1296	1328.4	1396.9	1409.7	1322.1	1361.8	1152.9	1289.1	1128.5	1340.43	1364.53	1190.17	1340.43	1364.53	1190.17	1.01798	0.570655	0	0.887897	0.061055	0	0.872215	0.035777	0	GO:0016020,membrane;GO:0048786,presynaptic active zone;GO:0048788,cytoskeleton of presynaptic active zone;GO:0098982,GABA-ergic synapse;GO:0098978,glutamatergic synapse;GO:0060077,inhibitory synapse;GO:0043005,neuron projection;GO:0098684,photoreceptor ribbon synapse;GO:0098831,presynaptic active zone cytoplasmic component;GO:0042734,presynaptic membrane;GO:0032991,protein-containing complex;GO:0…	GO:0046872,metal ion binding;GO:0017137,Rab GTPase binding;GO:0044325,ion channel binding;GO:0019904,protein domain specific binding;GO:0044877,protein-containing complex binding;GO:0098882,structural constituent of presynaptic active zone	GO:0048791,calcium ion-regulated exocytosis of neurotransmitter;GO:0006886,intracellular protein transport;GO:1903861,positive regulation of dendrite extension;GO:0017157,regulation of exocytosis;GO:0017156,calcium-ion regulated exocytosis;GO:0019933,cAMP-mediated signaling;GO:0030073,insulin secretion;GO:0007269,neurotransmitter secretion;GO:2000463,positive regulation of excitatory postsynaptic…	mmu:116838,path:mmu04911,Insulin secretion
KKCC1_MOUSE	Q8VBY2	Camkk1	Calcium/calmodulin-dependent protein kinase kinase 1	1476	1392.8	1580.9	1577.9	3316.4	2918.9	2821.3	2613.7	6479.9	1483.23	2604.4	3971.63	1483.23	2604.4	3971.63	1.75589	0.101286	0	2.67769	0.118796	0	1.52497	0.372022	0	GO:0005737,cytoplasm;GO:0005829,cytosol;GO:0005654,nucleoplasm	GO:0005524,ATP binding;GO:0004674,protein serine/threonine kinase activity;GO:0005516,calmodulin binding;GO:0004683,calmodulin-dependent protein kinase activity	GO:0032147,activation of protein kinase activity;GO:0035556,intracellular signal transduction;GO:0045860,positive regulation of protein kinase activity	mmu:55984,path:mmu05034,Alcoholism
THOC3_MOUSE	Q8VE80	Thoc3	THO complex subunit 3	598	537.7	616.7	601.1	579.5	590.3	518.4	551.4	503.2	584.133	590.3	524.333	584.133	590.3	524.333	1.01056	0.814693	0	0.897626	0.097514	0	0.888249	0.013192	0	GO:0000784,nuclear chromosome;GO:0016607,nuclear speck;GO:0000445,THO complex part of transcription export complex;GO:0000346,transcription export complex	GO:0003723,RNA binding	GO:0006406,mRNA export from nucleus;GO:0006397,mRNA processing;GO:0008380,RNA splicing;GO:0046784,viral mRNA export from host cell nucleus	mmu:73666,path:mmu03040,Spliceosome;mmu:73666,path:mmu03013,RNA transport
MSRA_MOUSE	Q9D6Y7	Msra	Mitochondrial peptide methionine sulfoxide reductase	1551.8	1600.7	1653.3	1686	1576.4	1701.9	1472.1	1539.8	1407	1601.93	1654.77	1472.97	1601.93	1654.77	1472.97	1.03298	0.342882	0	0.919493	0.055661	0	0.890136	0.0298	0	GO:0015629,actin cytoskeleton;GO:0005737,cytoplasm;GO:0005829,cytosol;GO:0045171,intercellular bridge;GO:0016020,membrane;GO:0005739,mitochondrion;GO:0016604,nuclear body;GO:0005654,nucleoplasm	GO:0008113,peptide-methionine (S)-S-oxide reductase activity;GO:0036456,L-methionine-(S)-S-oxide reductase activity	GO:0007568,aging;GO:0034599,cellular response to oxidative stress
AASS_MOUSE	Q99K67	Aass	Alpha-aminoadipic semialdehyde synthase, mitochondrial	660.5	684.7	708.4	738.6	665.5	701.3	574.1	700.8	589.7	684.533	701.8	621.533	684.533	701.8	621.533	1.02522	0.53134	0	0.907966	0.209905	0	0.885627	0.149914	0	GO:0005737,cytoplasm;GO:0043231,intracellular membrane-bounded organelle;GO:0005739,mitochondrion	GO:0016491,oxidoreductase activity;GO:0047131,saccharopine dehydrogenase (NAD+;GO:0047130,saccharopine dehydrogenase (NADP+	GO:0006091,generation of precursor metabolites and energy;GO:0019477,L-lysine catabolic process;GO:0033512,L-lysine catabolic process to acetyl-CoA via saccharopine	mmu:30956,path:mmu00310,Lysine degradation
RL27_MOUSE	P61358	Rpl27	60S ribosomal protein L27	1543.1	3052.2	1397.2	3466.7	3339.6	3326.2	3269.5	3017.1	3146	1997.5	3377.5	3144.2	1997.5	3377.5	3144.2	1.69086	0.060095	0	1.57407	0.098281	0	0.930925	0.052551	0	GO:0005840,ribosome;GO:0098556,cytoplasmic side of rough endoplasmic reticulum membrane;GO:0022625,cytosolic large ribosomal subunit;GO:0015934,large ribosomal subunit;GO:1990904,ribonucleoprotein complex	GO:0003735,structural constituent of ribosome	GO:0006412,translation;GO:1904044,response to aldosterone;GO:0006364,rRNA processing	mmu:108167922,path:mmu03010,Ribosome;mmu:19942,path:mmu03010,Ribosome
SGIP1_MOUSE	Q8VD37	Sgip1	SH3-containing GRB2-like protein 3-interacting protein 1	4376.2	7445.7	4791.7	7849.4	7441.6	8334.9	6858.2	7415.5	6554.1	5537.87	7875.3	6942.6	5537.87	7875.3	6942.6	1.42208	0.078686	0	1.25366	0.230457	0	0.881566	0.061066	0	GO:0030122,AP-2 adaptor complex;GO:0005905,clathrin-coated pit;GO:0030136,clathrin-coated vesicle;GO:0005737,cytoplasm;GO:0005856,cytoskeleton;GO:0005886,plasma membrane;GO:0098793,presynapse	GO:0008092,cytoskeletal protein binding;GO:0008017,microtubule binding;GO:0005543,phospholipid binding;GO:0017124,SH3 domain binding;GO:0015631,tubulin binding	GO:0072583,clathrin-dependent endocytosis;GO:0048268,clathrin coat assembly;GO:0097009,energy homeostasis;GO:0097320,plasma membrane tubulation;GO:1904000,positive regulation of eating behavior;GO:2000253,positive regulation of feeding behavior;GO:0040018,positive regulation of multicellular organism growth;GO:0048260,positive regulation of receptor-mediated endocytosis;GO:0002021,response to die…
ARL1_MOUSE	P61211	Arl1	ADP-ribosylation factor-like protein 1	346.8	363.2	370.4	389.9	677.7	674.3	637.7	708.2	700.5	360.133	580.633	682.133	360.133	580.633	682.133	1.61227	0.082409	0	1.89411	0.000161	1	1.17481	0.358623	0	GO:0005737,cytoplasm;GO:0005829,cytosol;GO:0005794,Golgi apparatus;GO:0000139,Golgi membrane;GO:0005802,trans-Golgi network	GO:0005525,GTP binding;GO:0008047,enzyme activator activity;GO:0003924,GTPase activity;GO:0046872,metal ion binding;GO:0019904,protein domain specific binding	GO:0031584,activation of phospholipase D activity;GO:0007030,Golgi organization;GO:0048193,Golgi vesicle transport;GO:0006886,intracellular protein transport;GO:0034067,protein localization to Golgi apparatus;GO:0042147,retrograde transport;GO:0009404,toxin metabolic process;GO:0016192,vesicle-mediated transport
[truncated: 3,833 more rows]
