# Supplementary material for: Proteomic Analysis Reveals That Mitochondria Dominate the Hippocampal Hypoxic Response in Mice
Source: Int J Mol Sci. 2022 Nov 15;23(22):14094. doi: 10.3390/ijms232214094 (PMC9697535; doi:10.3390/ijms232214094)
Supplement: Supplementary file 1 [file ijms-23-14094-s001.zip › Table S2.xlsx]

## Sheet: BP
GO-BP Term
TermID	Term	bg_pro_num	bg_term_num	fg_pronum	fg_termnum	Ratio	pvalue	Enrichment	FDR	IDs	GeneSymbol	cluster	GoType
GO:0006893	Golgi to plasma membrane transport	47180	61	748	6	0.0983607	0.0004121	3.385	0.108319	G8JL54_MOUSE,EXC6B_MOUSE,EXOC8_MOUSE,RABE1_MOUSE,EXOC2_MOUSE,GOGA7_MOUSE	Commd1,Exoc6b,Exoc8,Rabep1,Exoc2,Golga7	2	BP
GO:0010976	positive regulation of neuron projection development	47180	585	748	20	0.034188	0.0012562	2.90094	0.193607	WASC5_MOUSE,X3CL1_MOUSE,HSPB1_MOUSE,RAP1A_MOUSE,RELN_MOUSE,LYN_MOUSE,KTNB1_MOUSE,KCC2B_MOUSE,TIAM1_MOUSE,CNTN1_MOUSE,DMD_MOUSE,A0A087WQ70_MOUSE,KIF3C_MOUSE,FYN_MOUSE,A0A1B0GR18_MOUSE,PCP4_MOUSE,BIP_MOUSE,STMN2_MOUSE,SCRB2_MOUSE,PTN_MOUSE	Washc5,Cx3cl1,Hspb1,Rap1a,Reln,Lyn,Katnb1,Camk2b,Tiam1,Cntn1,Dmd,Serpine2,Kif3c,Fyn,Mob2,Pcp4,Hspa5,Stmn2,Scarb2,Ptn	2	BP
GO:0000398	mRNA splicing, via spliceosome	47180	433	1434	25	0.0577367	0.00188093	2.72563	0.159043	RUXE_MOUSE,SRSF9_MOUSE,RBM10_MOUSE,RSMB_MOUSE,U520_MOUSE,H7BX95_MOUSE,PRP6_MOUSE,SF3B6_MOUSE,A0A0B4J1E2_MOUSE,PRP8_MOUSE,SRSF2_MOUSE,LSM8_MOUSE,RED_MOUSE,PPIL1_MOUSE,E0CYW1_MOUSE,SNRPA_MOUSE,SRSF6_MOUSE,RU2A_MOUSE,SNUT1_MOUSE,IF4A3_MOUSE,A0A1B0GRU8_MOUSE,A0A0G2JFX7_MOUSE,PLRG1_MOUSE,CDC5L_MOUSE,SPF45_MOUSE	Snrpe,Srsf9,Rbm10,Snrpb,Snrnp200,Srsf1,Prpf6,Sf3b6,Snw1,Prpf8,Srsf2,Lsm8,Ik,Ppil1,Ubl5,Snrpa,Srsf6,Snrpa1,Sart1,Eif4a3,Prpf40a,Rbm8a,Plrg1,Cdc5l,Rbm17	3	BP
GO:1901673	regulation of mitotic spindle assembly	47180	43	1434	6	0.139535	0.00181707	2.74063	0.159043	CCSAP_MOUSE,CHM2B_MOUSE,CHMP5_MOUSE,CHM4B_MOUSE,HS71A_MOUSE,CH1B1_MOUSE	Ccsap,Chmp2b,Chmp5,Chmp4b,Hspa1a,Chmp1b1	3	BP
GO:0061952	midbody abscission	47180	34	1434	6	0.176471	0.000505593	3.2962	0.0769512	CHM2B_MOUSE,CHMP5_MOUSE,PDC6I_MOUSE,CHM4B_MOUSE,CH1B1_MOUSE,CHMP6_MOUSE	Chmp2b,Chmp5,Pdcd6ip,Chmp4b,Chmp1b1,Chmp6	3	BP
GO:0039702	viral budding via host ESCRT complex	47180	19	1434	5	0.263158	0.00020981	3.67817	0.0542646	CHM2B_MOUSE,PDC6I_MOUSE,CHM4B_MOUSE,CH1B1_MOUSE,CHMP6_MOUSE	Chmp2b,Pdcd6ip,Chmp4b,Chmp1b1,Chmp6	3	BP
GO:0007080	mitotic metaphase plate congression	47180	90	1434	10	0.111111	0.000411782	3.38533	0.0696369	CDC23_MOUSE,CHM2B_MOUSE,F8WJ93_MOUSE,CHMP5_MOUSE,CHM4B_MOUSE,NUP62_MOUSE,CUL3_MOUSE,CH1B1_MOUSE,IMB1_MOUSE,CHMP6_MOUSE	Cdc23,Chmp2b,Eml4,Chmp5,Chmp4b,Nup62,Cul3,Chmp1b1,Kpnb1,Chmp6	3	BP
GO:0006413	translational initiation	47180	54	1434	9	0.166667	3.34922e-05	4.47506	0.0218465	EIF3F_MOUSE,EIF3I_MOUSE,EIF3C_MOUSE,EIF3G_MOUSE,EIF3L_MOUSE,EIF3D_MOUSE,EIF3H_MOUSE,IF2G_MOUSE,EI2BD_MOUSE	Eif3f,Eif3i,Eif3c,Eif3g,Eif3l,Eif3d,Eif3h,Eif2s3x,Eif2b4	3	BP
GO:0060292	long-term synaptic depression	47180	48	1434	8	0.166667	9.13894e-05	4.0391	0.0333429	ABHD6_MOUSE,SRF_MOUSE,A0A1C7ZMY3_MOUSE,PTEN_MOUSE,GRIA1_MOUSE,CD38_MOUSE,D3YYS6_MOUSE,Q14BI1_MOUSE	Abhd6,Srf,Shank2,Pten,Gria1,Cd38,Mgll,Slc24a2	3	BP
GO:0006207	'de novo' pyrimidine nucleobase biosynthetic process	47180	18	1434	4	0.222222	0.00184879	2.73311	0.159043	PYRD_MOUSE,E9QAI5_MOUSE,UMPS_MOUSE,KCY_MOUSE	Dhodh,Cad,Umps,Cmpk1	3	BP
GO:0001919	regulation of receptor recycling	47180	24	1434	5	0.208333	0.000675941	3.17009	0.0992164	CHMP5_MOUSE,GRIA2_MOUSE,B0QZW1_MOUSE,GRIA1_MOUSE,GRIA3_MOUSE	Chmp5,Gria2,Gria3,Gria1,Gria3	3	BP
GO:0033146	regulation of intracellular estrogen receptor signaling pathway	47180	26	1434	5	0.192308	0.000994715	3.0023	0.110777	CARM1_MOUSE,DDRGK_MOUSE,A0A1B0GSM1_MOUSE,UFL1_MOUSE,SRC_MOUSE	Carm1,Ddrgk1,Ufsp2,Ufl1,Src	3	BP
GO:2000300	regulation of synaptic vesicle exocytosis	47180	214	1434	17	0.0794393	0.0003231	3.49066	0.0622044	A2A517_MOUSE,D6RIL1_MOUSE,D9HP81_MOUSE,E9QAQ5_MOUSE,E9Q175_MOUSE,KPCE_MOUSE,CSPG5_MOUSE,A0A087WPQ9_MOUSE,D3Z079_MOUSE,GIT1_MOUSE,KPCB_MOUSE,A0A286YCW7_MOUSE,KPCG_MOUSE,CACB4_MOUSE,ADCY1_MOUSE,RIMS1_MOUSE,NRX3A_MOUSE	Cyth1,Nr3c2,Rims2,Gsk3b,Myo6,Prkce,Cspg5,Nrxn3,Stxbp5,Git1,Prkcb,Nrn1,Prkcg,Cacnb4,Adcy1,Rims1,Nrxn3	3	BP
GO:0099175	regulation of postsynapse organization	47180	98	1434	10	0.102041	0.000810903	3.09103	0.108084	A2BDQ4_MOUSE,AB17C_MOUSE,CHM2B_MOUSE,CHM4B_MOUSE,E9QAF9_MOUSE,A0A0G2JGW6_MOUSE,RPGF4_MOUSE,A0A2I3BPP1_MOUSE,RHEB_MOUSE,VHL_MOUSE	Epha7,Abhd17c,Chmp2b,Chmp4b,Tanc1,Cdkl5,Rapgef4,Tsc2,Rheb,Vhl	3	BP
GO:0042026	protein refolding	47180	28	1434	5	0.178571	0.00141329	2.84977	0.140284	DNJA4_MOUSE,HS71A_MOUSE,DNJB2_MOUSE,DNJA2_MOUSE,HSP13_MOUSE	Dnaja4,Hspa1a,Dnajb2,Dnaja2,Hspa13	3	BP
GO:0007032	endosome organization	47180	116	1434	12	0.103448	0.000223038	3.65162	0.0542646	HOOK1_MOUSE,RAB5C_MOUSE,RAB5B_MOUSE,VP33B_MOUSE,CHM2B_MOUSE,BIG2_MOUSE,A2AI52_MOUSE,A2ARZ7_MOUSE,F6W8Z8_MOUSE,WASC4_MOUSE,VPS11_MOUSE,F8WHJ1_MOUSE	Hook1,Rab5c,Rab5b,Vps33b,Chmp2b,Arfgef2,Usp8,Rab22a,Dnm1,Washc4,Vps11,Fam160a2	3	BP
GO:0098974	postsynaptic actin cytoskeleton organization	47180	73	1434	8	0.109589	0.00166974	2.77735	0.15248	WASF2_MOUSE,DBNL_MOUSE,SI1L1_MOUSE,H3BKQ7_MOUSE,WASL_MOUSE,CAPON_MOUSE,ARHG7_MOUSE,AGRB1_MOUSE	Wasf2,Dbnl,Sipa1l1,Ppp1r9a,Wasl,Nos1ap,Arhgef7,Adgrb1	3	BP
GO:0032543	mitochondrial translation	47180	80	1434	10	0.125	0.000155708	3.80769	0.0444353	RT11_MOUSE,GATC_MOUSE,G3UX79_MOUSE,RT15_MOUSE,Q5RL20_MOUSE,RT34_MOUSE,GATB_MOUSE,NDUA7_MOUSE,E9PUY1_MOUSE,B1B1D8_MOUSE	Mrps11,Gatc,Mrps18b,Mrps15,Mrpl43,Mrps34,Gatb,Ndufa7,Mrps12,Mrpl2	3	BP
GO:0098883	synapse pruning	47180	12	1434	4	0.333333	0.000345961	3.46097	0.0622044	NGEF_MOUSE,EPHA4_MOUSE,C1QC_MOUSE,C1QB_MOUSE	Ngef,Epha4,C1qc,C1qb	3	BP
GO:0006470	protein dephosphorylation	47180	332	1434	24	0.0722892	9.52982e-05	4.02092	0.0333429	NCEH1_MOUSE,PP2BC_MOUSE,PHLP1_MOUSE,PP1G_MOUSE,STK11_MOUSE,Q99NF7_MOUSE,A0A1W2P750_MOUSE,SSH2_MOUSE,PPM1E_MOUSE,B1AQF4_MOUSE,PTEN_MOUSE,PTN11_MOUSE,PPM1G_MOUSE,PPM1F_MOUSE,PPP6_MOUSE,E0CZ78_MOUSE,MYPT1_MOUSE,2A5A_MOUSE,PTN5_MOUSE,A2AJQ0_MOUSE,PTN12_MOUSE,A0A1B0GRT6_MOUSE,LHPP_MOUSE,ILKAP_MOUSE	Nceh1,Ppp3cc,Phlpp1,Ppp1cc,Stk11,Ppm1b,Ppp1r12a,Ssh2,Ppm1e,Dusp3,Pten,Ptpn11,Ppm1g,Ppm1f,Ppp6c,Ppp3cb,Ppp1r12a,Ppp2r5a,Ptpn5,Pdp1,Ptpn12,Ptpre,Lhpp,Ilkap	3	BP
GO:0032456	endocytic recycling	47180	117	1434	11	0.0940171	0.00090408	3.04379	0.108084	A2A6M1_MOUSE,DEN1A_MOUSE,CCD22_MOUSE,Q78ZM0_MOUSE,VPS29_MOUSE,VPS51_MOUSE,VPS50_MOUSE,PTN23_MOUSE,SNX4_MOUSE,EIPR1_MOUSE,A0A338P6P6_MOUSE	Snf8,Dennd1a,Ccdc22,Snx3,Vps29,Vps51,Vps50,Ptpn23,Snx4,Eipr1,Acap2	3	BP
GO:0007409	axonogenesis	47180	396	1434	30	0.0757576	5.5174e-06	5.25827	0.00629811	SLIK3_MOUSE,ACTBL_MOUSE,ZDH17_MOUSE,STK11_MOUSE,D3YWV5_MOUSE,S4R1P5_MOUSE,E9QAQ5_MOUSE,TAOK2_MOUSE,A2ARP8_MOUSE,KALRN_MOUSE,D3YXA6_MOUSE,A2A9M4_MOUSE,PTN11_MOUSE,G3UZJ2_MOUSE,MAP1S_MOUSE,D3Z079_MOUSE,A0A286YCW7_MOUSE,L2GL1_MOUSE,AMGO1_MOUSE,DCLK1_MOUSE,B2RUG9_MOUSE,FLOT1_MOUSE,BRSK1_MOUSE,E9PX29_MOUSE,ADCY1_MOUSE,E9QAW9_MOUSE,CCKN_MOUSE,A0A087WNU5_MOUSE,BC11B_MOUSE,SLIK1_MOUSE	Slitrk3,Actbl2,Zdhhc17,Stk11,Sema4a,Dst,Gsk3b,Taok2,Map1a,Kalrn,Trim46,Dock7,Ptpn11,Map2,Map1s,Stxbp5,Nrn1,Llgl1,Amigo1,Dclk1,Apc,Flot1,Brsk1,Sptbn4,Adcy1,Slit1,Cck,Ank3,Bcl11b,Slitrk1	3	BP
GO:0032482	Rab protein signal transduction	47180	36	1434	6	0.166667	0.000695341	3.1578	0.0992164	RB39B_MOUSE,A2CG35_MOUSE,RAB21_MOUSE,RAB9A_MOUSE,RAB4A_MOUSE,RAB4B_MOUSE	Rab39b,Rab12,Rab21,Rab9a,Rab4a,Rab4b	3	BP
GO:0001732	formation of cytoplasmic translation initiation complex	47180	35	1434	10	0.285714	5.98652e-08	7.22283	9.11149e-05	EIF3F_MOUSE,EIF3I_MOUSE,EIF3C_MOUSE,EIF3G_MOUSE,EIF3A_MOUSE,EIF3L_MOUSE,EIF3D_MOUSE,EI3JB_MOUSE,EIF3H_MOUSE,IF5_MOUSE	Eif3f,Eif3i,Eif3c,Eif3g,Eif3a,Eif3l,Eif3d,Eif3j2,Eif3h,Eif5	3	BP
GO:0075525	viral translational termination-reinitiation	47180	9	1434	4	0.444444	9.47493e-05	4.02342	0.0333429	EIF3G_MOUSE,EIF3A_MOUSE,EIF3L_MOUSE,EIF3D_MOUSE	Eif3g,Eif3a,Eif3l,Eif3d	3	BP
GO:0001731	formation of translation preinitiation complex	47180	30	1434	5	0.166667	0.00194894	2.7102	0.161797	DHX29_MOUSE,DENR_MOUSE,RS2_MOUSE,IF5_MOUSE,IF2G_MOUSE	Dhx29,Denr,Rps2,Eif5,Eif2s3x	3	BP
GO:0099641	anterograde axonal protein transport	47180	26	1434	6	0.230769	0.000106505	3.97263	0.0333429	A2ARP8_MOUSE,E9Q6E0_MOUSE,KIF5C_MOUSE,KINH_MOUSE,KIF5A_MOUSE,RB27B_MOUSE	Map1a,Mapk8ip3,Kif5c,Kif5b,Kif5a,Rab27b	3	BP
GO:0031333	negative regulation of protein-containing complex assembly	47180	106	1434	10	0.0943396	0.00148428	2.82848	0.144197	CRYAB_MOUSE,GLCM_MOUSE,TFP11_MOUSE,E9QAQ5_MOUSE,HDAC6_MOUSE,IMPCT_MOUSE,SORL_MOUSE,A0A0U1RNF2_MOUSE,D3Z600_MOUSE,SRC_MOUSE	Cryab,Gba,Tfip11,Gsk3b,Hdac6,Impact,Sorl1,Lcmt1,Pex5,Src	3	BP
GO:0048814	regulation of dendrite morphogenesis	47180	100	1434	10	0.1	0.00094923	3.02263	0.108355	STK11_MOUSE,E9QAQ5_MOUSE,SI1L1_MOUSE,B2RQ80_MOUSE,A0A1L1STC6_MOUSE,NEDD4_MOUSE,A2AI21_MOUSE,G5E843_MOUSE,AGRB3_MOUSE,HECW2_MOUSE	Stk11,Gsk3b,Sipa1l1,Tnik,Syne1,Nedd4,Grin1,Robo1,Adgrb3,Hecw2	3	BP
GO:0032225	regulation of synaptic transmission, dopaminergic	47180	7	1434	3	0.428571	0.0008947	3.04832	0.108084	A0A0R4J1J1_MOUSE,D3YWB9_MOUSE,PNKD_MOUSE	Pnkd,Cntnap4,Pnkd	3	BP
GO:0071985	multivesicular body sorting pathway	47180	17	1434	6	0.352941	7.23893e-06	5.14033	0.0066106	A2A6M1_MOUSE,RB27A_MOUSE,CHMP5_MOUSE,VPS25_MOUSE,VTA1_MOUSE,RB27B_MOUSE	Snf8,Rab27a,Chmp5,Vps25,Vta1,Rab27b	3	BP
GO:0006616	SRP-dependent cotranslational protein targeting to membrane, translocation	47180	18	1434	4	0.222222	0.00184879	2.73311	0.159043	SRP54_MOUSE,Q9CYJ6_MOUSE,SC61B_MOUSE,ZFN2B_MOUSE	Srp54,Sec61a2,Sec61b,Zfand2b	3	BP
GO:2001311	lysobisphosphatidic acid metabolic process	47180	2	1434	2	1	0.000923185	3.03471	0.108084	ABHD6_MOUSE,PPA6_MOUSE	Abhd6,Acp6	3	BP
GO:0035508	positive regulation of myosin-light-chain-phosphatase activity	47180	2	1434	2	1	0.000923185	3.03471	0.108084	A0A1W2P750_MOUSE,MYPT1_MOUSE	Ppp1r12a,Ppp1r12a	3	BP
GO:0006610	ribosomal protein import into nucleus	47180	4	1434	3	0.75	0.000109536	3.96044	0.0333429	IPO5_MOUSE,IMB1_MOUSE,IPO11_MOUSE	Ipo5,Kpnb1,Ipo11	3	BP
GO:0002184	cytoplasmic translational termination	47180	5	1434	3	0.6	0.000267621	3.57248	0.0603643	ERF1_MOUSE,ERF3B_MOUSE,ERF3A_MOUSE	Etf1,Gspt2,Gspt1	3	BP
GO:0006606	protein import into nucleus	47180	272	1434	21	0.0772059	0.000102225	3.99044	0.0333429	A0A1D5RMG4_MOUSE,AGAP3_MOUSE,TNPO1_MOUSE,TNPO3_MOUSE,IPO7_MOUSE,TNPO2_MOUSE,NUP88_MOUSE,NUP62_MOUSE,NXT2_MOUSE,SEC13_MOUSE,IPO4_MOUSE,XPO2_MOUSE,DP13A_MOUSE,NUP93_MOUSE,NU133_MOUSE,IPO5_MOUSE,PHB2_MOUSE,A0A2I3BPP1_MOUSE,IMB1_MOUSE,NUP85_MOUSE,IPO11_MOUSE	Agap3,Agap3,Tnpo1,Tnpo3,Ipo7,Tnpo2,Nup88,Nup62,Nxt2,Sec13,Ipo4,Cse1l,Appl1,Nup93,Nup133,Ipo5,Phb2,Tsc2,Kpnb1,Nup85,Ipo11	3	BP
GO:0046755	viral budding	47180	33	1434	6	0.181818	0.000427285	3.36928	0.069678	CHMP5_MOUSE,PDC6I_MOUSE,CHM4B_MOUSE,NEDD4_MOUSE,LRSM1_MOUSE,VTA1_MOUSE	Chmp5,Pdcd6ip,Chmp4b,Nedd4,Lrsam1,Vta1	3	BP
GO:0015031	protein transport	47180	1327	1434	79	0.0595328	1.52252e-08	7.81744	3.47591e-05	HOOK1_MOUSE,A2A6M1_MOUSE,AKAP8_MOUSE,MTX2_MOUSE,RB39B_MOUSE,WASC2_MOUSE,YKT6_MOUSE,SCAM3_MOUSE,A0A0A6YX21_MOUSE,VP33B_MOUSE,DEN1A_MOUSE,CHM2B_MOUSE,RAB2B_MOUSE,NECP2_MOUSE,COPD_MOUSE,CCD22_MOUSE,CHMP5_MOUSE,PDC6I_MOUSE,AP3S2_MOUSE,H7BX09_MOUSE,MYO1D_MOUSE,AGAP1_MOUSE,PRAF2_MOUSE,P85B_MOUSE,E9Q175_MOUSE,A0A5H1ZRL1_MOUSE,BIG2_MOUSE,D3Z4U5_MOUSE,EXOC3_MOUSE,A16L1_MOUSE,COG8_MOUSE,E9Q1K0_MOUSE,D3Z079…	Hook1,Snf8,Akap8,Mtx2,Rab39b,Washc2,Ykt6,Scamp3,Sft2d2,Vps33b,Dennd1a,Chmp2b,Rab2b,Necap2,Arcn1,Ccdc22,Chmp5,Pdcd6ip,Ap3s2,Grip1,Myo1d,Agap1,Praf2,Pik3r2,Myo6,Spire1,Arfgef2,Jakmip1,Exoc3,Atg16l1,Cog8,Snx25,Stxbp5,Ist1,Exoc6,Ap2s1,Snx3,Vps29,Vps51,Nup93,Ktn1,Synrg,Arfgap1,Arl8b,Chmp1b1,Vps50,Rab9a,Itsn1,Mtx1,Ptpn23,Exoc7,Washc4,Vps33a,Myh9,Kif3a,Atg9a,Snx4,Mon2,Sec61a2,Ppt1,Fam160a2,Snx30,Cetn2,S…	3	BP
GO:0048013	ephrin receptor signaling pathway	47180	121	1434	12	0.0991736	0.000330511	3.48081	0.0622044	A2BDQ4_MOUSE,NCK1_MOUSE,A0A5F8MPY3_MOUSE,SI1L1_MOUSE,EFNB3_MOUSE,PTN11_MOUSE,NGEF_MOUSE,GIT1_MOUSE,CRK_MOUSE,CHIN_MOUSE,EPHA4_MOUSE,EPHB1_MOUSE	Epha7,Nck1,Ptk2,Sipa1l1,Efnb3,Ptpn11,Ngef,Git1,Crk,Chn1,Epha4,Ephb1	3	BP
GO:0007040	lysosome organization	47180	151	1434	13	0.0860927	0.000745874	3.12733	0.103202	HOOK1_MOUSE,GLCM_MOUSE,CHMP5_MOUSE,A0A5F8MPS7_MOUSE,GRN_MOUSE,T106B_MOUSE,HEXB_MOUSE,PPT1_MOUSE,F8WHJ1_MOUSE,VPS35_MOUSE,CLVS2_MOUSE,G5E8Q0_MOUSE,HEXA_MOUSE	Hook1,Gba,Chmp5,Acp2,Grn,Tmem106b,Hexb,Ppt1,Fam160a2,Vps35,Clvs2,Lyst,Hexa	3	BP
GO:0031204	posttranslational protein targeting to membrane, translocation	47180	15	1434	4	0.266667	0.000886899	3.05213	0.108084	SEC62_MOUSE,SEC63_MOUSE,Q9CYJ6_MOUSE,SC61B_MOUSE	Sec62,Sec63,Sec61a2,Sec61b	3	BP
GO:0007420	brain development	47180	793	1434	43	0.0542245	0.000225805	3.64627	0.0542646	PP2BC_MOUSE,A2BDQ4_MOUSE,RSMB_MOUSE,BAG3_MOUSE,E9PV41_MOUSE,A0A1C7ZMY3_MOUSE,CTTB2_MOUSE,SCOT1_MOUSE,D3Z4J9_MOUSE,E9Q5E1_MOUSE,PTN11_MOUSE,MAP1S_MOUSE,A0A1L1SVK0_MOUSE,ABR_MOUSE,HNMT_MOUSE,GBRA5_MOUSE,GIT1_MOUSE,S38A3_MOUSE,A0A1B0GR08_MOUSE,GNAI3_MOUSE,E9Q6A0_MOUSE,SNAA_MOUSE,L2GL1_MOUSE,BAG6_MOUSE,ROGDI_MOUSE,ARL6_MOUSE,AMGO1_MOUSE,DCLK1_MOUSE,B1B0C7_MOUSE,E9Q0N0_MOUSE,MACD2_MOUSE,IRS2_MOUSE,PPT…	Ppp3cc,Epha7,Snrpb,Bag3,Diaph1,Shank2,Cttnbp2,Oxct1,Eml1,Pcdh19,Ptpn11,Map1s,Pafah1b2,Abr,Hnmt,Gabra5,Git1,Slc38a3,Tubgcp2,Gnai3,Robo2,Napa,Llgl1,Bag6,Rogdi,Arl6,Amigo1,Dclk1,Hspg2,Itsn1,Macrod2,Irs2,Ppt1,Acsl3,Htt,Nfib,Adcy1,Mbd3,Tbc1d23,Cd9,Srr,Adgrg1,Adgrl3	3	BP
GO:0048167	regulation of synaptic plasticity	47180	193	1434	16	0.0829016	0.000297574	3.52641	0.0617601	D9HP81_MOUSE,A2ARP8_MOUSE,SI1L1_MOUSE,E9Q175_MOUSE,GRIA1_MOUSE,JPH3_MOUSE,A0A0A6YWG7_MOUSE,VGF_MOUSE,A2AI21_MOUSE,NMDE1_MOUSE,BRSK1_MOUSE,G3X9H5_MOUSE,RGRF1_MOUSE,AGRB1_MOUSE,JPH4_MOUSE,RIMS1_MOUSE	Rims2,Map1a,Sipa1l1,Myo6,Gria1,Jph3,Rapgef2,Vgf,Grin1,Grin2a,Brsk1,Htt,Rasgrf1,Adgrb1,Jph4,Rims1	3	BP
GO:0030838	positive regulation of actin filament polymerization	47180	126	577	8	0.0634921	0.000169462	3.77093	0.0697939	A0A3Q4L2V5_MOUSE,BAG4_MOUSE,BIN1_MOUSE,MTOR_MOUSE,FAK2_MOUSE,NCKP1_MOUSE,NCK2_MOUSE,PROF1_MOUSE	Mlst8,Bag4,Bin1,Mtor,Ptk2b,Nckap1,Nck2,Pfn1	5	BP
GO:0006417	regulation of translation	47180	227	577	10	0.0440529	0.000534216	3.27228	0.154014	CYFP1_MOUSE,A0A2I3BQZ9_MOUSE,GCN1_MOUSE,TCOF_MOUSE,PP1A_MOUSE,TSC1_MOUSE,PA2G4_MOUSE,AKT1_MOUSE,A0A0R4IZZ1_MOUSE,CNOT1_MOUSE	Cyfip1,App,Gcn1,Tcof1,Ppp1ca,Tsc1,Pa2g4,Akt1,Aplp1,Cnot1	5	BP
GO:0005979	regulation of glycogen biosynthetic process	47180	21	577	4	0.190476	0.000112307	3.9496	0.0539633	PP1B_MOUSE,MTOR_MOUSE,PP1A_MOUSE,AKT1_MOUSE	Ppp1cb,Mtor,Ppp1ca,Akt1	5	BP
GO:0006449	regulation of translational termination	47180	8	577	3	0.375	9.73477e-05	4.01167	0.0539633	D3YTU2_MOUSE,SHFL_MOUSE,RENT1_MOUSE	Ogfod1,Shfl,Upf1	5	BP
GO:1990592	protein K69-linked ufmylation	47180	13	577	3	0.230769	0.000474987	3.32332	0.154014	UFM1_MOUSE,UFC1_MOUSE,UBA5_MOUSE	Ufm1,Ufc1,Uba5	5	BP
GO:0070327	thyroid hormone transport	47180	18	577	3	0.166667	0.00129493	2.88776	0.209199	LAT2_MOUSE,CRYM_MOUSE,Q66L38_MOUSE	Slc7a8,Crym,Slco1c1	5	BP
GO:0000055	ribosomal large subunit export from nucleus	47180	19	577	3	0.157895	0.00152382	2.81707	0.209199	RAN_MOUSE,NPM_MOUSE,RRS1_MOUSE	Ran,Npm1,Rrs1	5	BP
GO:0015827	tryptophan transport	47180	14	577	3	0.214286	0.000599046	3.22254	0.157004	LAT2_MOUSE,F6X479_MOUSE,4F2_MOUSE	Slc7a8,Ace2,Slc3a2	5	BP
GO:0009257	10-formyltetrahydrofolate biosynthetic process	47180	4	577	2	0.5	0.000881374	3.05484	0.1815	C1TC_MOUSE,C1TM_MOUSE	Mthfd1,Mthfd1l	5	BP
GO:1902630	regulation of membrane hyperpolarization	47180	5	577	2	0.4	0.00145704	2.83653	0.209199	HCN1_MOUSE,A0A2U3TZ49_MOUSE	Hcn1,Cacnb3	5	BP
GO:0061709	reticulophagy	47180	36	577	5	0.138889	7.40998e-05	4.13018	0.0539633	RETR3_MOUSE,UFM1_MOUSE,F7CC56_MOUSE,UFC1_MOUSE,UBA5_MOUSE	Retreg3,Ufm1,Rb1cc1,Ufc1,Uba5	5	BP
GO:0002265	astrocyte activation involved in immune response	47180	17	577	3	0.176471	0.00108896	2.96299	0.209199	A0A2I3BQZ9_MOUSE,PSN1_MOUSE,A0A0R4J0I9_MOUSE	App,Psen1,Lrp1	5	BP
GO:0034063	stress granule assembly	47180	82	577	6	0.0731707	0.000520116	3.2839	0.154014	UBP2L_MOUSE,DDX3X_MOUSE,D3YTU2_MOUSE,BICD1_MOUSE,DYHC1_MOUSE,IF2A_MOUSE	Ubap2l,Ddx3x,Ogfod1,Bicd1,Dync1h1,Eif2s1	5	BP
GO:0035584	calcium-mediated signaling using intracellular calcium source	47180	58	577	5	0.0862069	0.000722237	3.14132	0.173517	A0A1Y7VJP1_MOUSE,AGRL1_MOUSE,E9Q4S7_MOUSE,TEN2_MOUSE,NTRK2_MOUSE	Ryr2,Adgrl1,Ptprj,Tenm2,Ntrk2	5	BP
GO:0010501	RNA secondary structure unwinding	47180	19	577	3	0.157895	0.00152382	2.81707	0.209199	AGO2_MOUSE,DDX3X_MOUSE,E9QNN1_MOUSE	Ago2,Ddx3x,Dhx9	5	BP
GO:0030032	lamellipodium assembly	47180	133	577	7	0.0526316	0.00130457	2.88453	0.209199	KIT_MOUSE,CYFP1_MOUSE,ARHG4_MOUSE,NCKP1_MOUSE,NCK2_MOUSE,A0A0J9YV30_MOUSE,A0A571BF78_MOUSE	Kit,Cyfip1,Arhgef4,Nckap1,Nck2,Pxn,Wasf3	5	BP
GO:1905606	regulation of presynapse assembly	47180	122	577	7	0.057377	0.000787676	3.10365	0.174682	NLGN2_MOUSE,LRC4B_MOUSE,A0A2I3BQZ9_MOUSE,GPC4_MOUSE,MDGA1_MOUSE,LRFN3_MOUSE,J3QNA0_MOUSE	Nlgn2,Lrrc4b,App,Gpc4,Mdga1,Lrfn3,Ntng2	5	BP
GO:0048524	positive regulation of viral process	47180	5	577	2	0.4	0.00145704	2.83653	0.209199	STOM_MOUSE,VPS4A_MOUSE	Stom,Vps4a	5	BP
GO:0031175	neuron projection development	47180	568	748	25	0.0440141	5.88862e-06	5.22999	0.0100607	A2AER8_MOUSE,WASF1_MOUSE,MECP2_MOUSE,LYN_MOUSE,VAPA_MOUSE,GRIN1_MOUSE,LAMB2_MOUSE,CAPZB_MOUSE,NEB2_MOUSE,HDGR3_MOUSE,CNTN1_MOUSE,SEPT2_MOUSE,CDK5_MOUSE,BIG1_MOUSE,Q3UH59_MOUSE,MK09_MOUSE,A0A494BAG7_MOUSE,STMN2_MOUSE,A0A0G2JG35_MOUSE,NCDN_MOUSE,E9PZP8_MOUSE,ATG7_MOUSE,D3YVM8_MOUSE,CDK16_MOUSE,WDR5_MOUSE	Pqbp1,Wasf1,Mecp2,Lyn,Vapa,Gprin1,Lamb2,Capzb,Ppp1r9b,Hdgfl3,Cntn1,Septin2,Cdk5,Arfgef1,Myh10,Mapk9,Bloc1s2,Stmn2,Map4,Ncdn,Herc1,Atg7,Bloc1s1,Cdk16,Wdr5	2	BP
GO:0050808	synapse organization	47180	263	748	15	0.0570342	2.37885e-05	4.62363	0.0162571	A0A0G2JDE3_MOUSE,LRRT2_MOUSE,CBLN1_MOUSE,A1L3P4_MOUSE,S4R2K9_MOUSE,LAMB2_MOUSE,BSN_MOUSE,SYUG_MOUSE,E9PW06_MOUSE,LIPA3_MOUSE,SYUA_MOUSE,F7CYX4_MOUSE,NAC2_MOUSE,Q3UHH0_MOUSE,LRRT1_MOUSE	Adgrl2,Lrrtm2,Cbln1,Slc9a6,Ank3,Lamb2,Bsn,Sncg,Nfasc,Ppfia3,Snca,Ppfia2,Slc8a2,Atp2b2,Lrrtm1	2	BP
GO:0016601	Rac protein signal transduction	47180	72	748	7	0.0972222	0.000147644	3.83079	0.0720712	ALS2_MOUSE,WASF1_MOUSE,EPS8_MOUSE,ELMO1_MOUSE,TIAM1_MOUSE,Q3TLP8_MOUSE,BRK1_MOUSE	Als2,Wasf1,Eps8,Elmo1,Tiam1,Rac1,Brk1	2	BP
GO:0006622	protein targeting to lysosome	47180	51	748	5	0.0980392	0.00127117	2.8958	0.193607	SNX16_MOUSE,HGS_MOUSE,MPRD_MOUSE,SCRB2_MOUSE,SORT_MOUSE	Snx16,Hgs,M6pr,Scarb2,Sort1	2	BP
GO:0098962	regulation of postsynaptic neurotransmitter receptor activity	47180	53	748	5	0.0943396	0.00151313	2.82012	0.209547	NPTX2_MOUSE,DLGP1_MOUSE,DLGP2_MOUSE,B1AS06_MOUSE,SHSA6_MOUSE	Nptx2,Dlgap1,Dlgap2,Dlgap3,Shisa6	2	BP
GO:0002181	cytoplasmic translation	47180	93	748	9	0.0967742	1.77265e-05	4.75138	0.0151429	RL29_MOUSE,RL8_MOUSE,RL9_MOUSE,RL11_MOUSE,RS23_MOUSE,DRG1_MOUSE,A0A3B2WDD2_MOUSE,RL26_MOUSE,RL19_MOUSE	Rpl29,Rpl8,Rpl9,Rpl11,Rps23,Drg1,Rpl10a,Rpl26,Rpl19	2	BP
GO:0006412	translation	47180	454	748	28	0.061674	1.51993e-09	8.81818	5.1936e-06	EGFR_MOUSE,RM13_MOUSE,RS9_MOUSE,RL29_MOUSE,RS27L_MOUSE,RS3_MOUSE,RL3_MOUSE,EFTU_MOUSE,RL13A_MOUSE,Q9CQM8_MOUSE,RS8_MOUSE,RL9_MOUSE,RL32_MOUSE,RL11_MOUSE,RL13_MOUSE,RL14_MOUSE,RS23_MOUSE,G3X9Q6_MOUSE,A0A3B2WDD2_MOUSE,RL26_MOUSE,RL23A_MOUSE,RL19_MOUSE,Q91V55_MOUSE,RL34_MOUSE,RT09_MOUSE,EIF3M_MOUSE,RT63_MOUSE,RL35_MOUSE	Egfr,Mrpl13,Rps9,Rpl29,Rps27l,Rps3,Rpl3,Tufm,Rpl13a,Rpl21,Rps8,Rpl9,Rpl32,Rpl11,Rpl13,Rpl14,Rps23,Larp4,Rpl10a,Rpl26,Rpl23a,Rpl19,Rps5,Rpl34,Mrps9,Eif3m,Mrpl57,Rpl35	2	BP
GO:0006997	nucleus organization	47180	56	748	7	0.125	2.89259e-05	4.53871	0.0164733	Q6P1B9_MOUSE,H33_MOUSE,E9QMU3_MOUSE,VPS4B_MOUSE,LMNA_MOUSE,CHM1A_MOUSE,H11_MOUSE	Bin1,H3-3a,Map7,Vps4b,Lmna,Chmp1a,H1-1	2	BP
GO:0060291	long-term synaptic potentiation	47180	187	748	13	0.0695187	1.03775e-05	4.98391	0.0118199	LRRT2_MOUSE,MECP2_MOUSE,RELN_MOUSE,D3YZU4_MOUSE,GFAP_MOUSE,KCC2B_MOUSE,A0A087WQ70_MOUSE,SHAN3_MOUSE,SYUA_MOUSE,MK01_MOUSE,NAC2_MOUSE,PTN_MOUSE,LRRT1_MOUSE	Lrrtm2,Mecp2,Reln,Shank1,Gfap,Camk2b,Serpine2,Shank3,Snca,Mapk1,Slc8a2,Ptn,Lrrtm1	2	BP
GO:0034314	Arp2/3 complex-mediated actin nucleation	47180	44	748	5	0.113636	0.000643659	3.19134	0.144034	ARPC2_MOUSE,ARPC4_MOUSE,ARC1A_MOUSE,ARPC3_MOUSE,WASH1_MOUSE	Arpc2,Arpc4,Arpc1a,Arpc3,Washc1	2	BP
GO:0008333	endosome to lysosome transport	47180	130	748	9	0.0692308	0.000241795	3.61655	0.0779772	SNX16_MOUSE,HGS_MOUSE,Q6P1B9_MOUSE,STX8_MOUSE,CHMP3_MOUSE,TGFA1_MOUSE,SORT_MOUSE,VPS41_MOUSE,VPS18_MOUSE	Snx16,Hgs,Bin1,Stx8,Chmp3,Tgfbrap1,Sort1,Vps41,Vps18	2	BP
GO:0090314	positive regulation of protein targeting to membrane	47180	123	748	8	0.0650407	0.000800892	3.09643	0.144034	ARPC2_MOUSE,HPCA_MOUSE,S4R2K9_MOUSE,CDK5_MOUSE,AKT2_MOUSE,FYN_MOUSE,RASH_MOUSE,MYO1C_MOUSE	Arpc2,Hpca,Ank3,Cdk5,Akt2,Fyn,Hras,Myo1c	2	BP
GO:0035418	protein localization to synapse	47180	73	748	6	0.0821918	0.00107661	2.96794	0.183938	DLGP1_MOUSE,RELN_MOUSE,D3YZU4_MOUSE,BSN_MOUSE,CDK5_MOUSE,LRRT1_MOUSE	Dlgap1,Reln,Shank1,Bsn,Cdk5,Lrrtm1	2	BP
GO:0000045	autophagosome assembly	47180	173	748	9	0.0520231	0.00187067	2.728	0.24585	EMC6_MOUSE,BECN1_MOUSE,UBX2B_MOUSE,ATG2B_MOUSE,GBRL2_MOUSE,Q9D4I9_MOUSE,ATG3_MOUSE,ATG7_MOUSE,E9Q7E9_MOUSE	Emc6,Becn1,Ubxn2b,Atg2b,Gabarapl2,Rab23,Atg3,Atg7,Pacs2	2	BP
GO:1902065	response to L-glutamate	47180	20	748	4	0.2	0.000248059	3.60544	0.0779772	Q62347_MOUSE,HPCA_MOUSE,B1AU25_MOUSE,PCNA_MOUSE	Creb1,Hpca,Aifm1,Pcna	2	BP
GO:1904373	response to kainic acid	47180	3	748	2	0.666667	0.000745134	3.12777	0.144034	NEB2_MOUSE,PTN_MOUSE	Ppp1r9b,Ptn	2	BP
GO:0016260	selenocysteine biosynthetic process	47180	2	748	2	1	0.000251024	3.60028	0.0779772	SPS2_MOUSE,SPS1_MOUSE	Sephs2,Sephs1	2	BP
GO:0006427	histidyl-tRNA aminoacylation	47180	3	748	2	0.666667	0.000745134	3.12777	0.144034	HARS1_MOUSE,G5E823_MOUSE	Hars1,Hars2	2	BP
GO:0051402	neuron apoptotic process	47180	134	748	9	0.0671642	0.000302992	3.51857	0.0862768	BNIP3_MOUSE,B1AU25_MOUSE,NICA_MOUSE,CDK5_MOUSE,F162A_MOUSE,BIP_MOUSE,SCN2A_MOUSE,S4R1W8_MOUSE,TNR21_MOUSE	Bnip3,Aifm1,Ncstn,Cdk5,Fam162a,Hspa5,Scn2a,Gapdh,Tnfrsf21	2	BP
GO:0002218	activation of innate immune response	47180	94	748	7	0.0744681	0.000760547	3.11887	0.144034	A2AER8_MOUSE,MAVS_MOUSE,HS90A_MOUSE,MATR3_MOUSE,RBM14_MOUSE,NONO_MOUSE,TOM70_MOUSE	Pqbp1,Mavs,Hsp90aa1,Matr3,Rbm14,Nono,Tomm70	2	BP
GO:0006164	purine nucleotide biosynthetic process	47180	39	1434	6	0.153846	0.00107794	2.96741	0.115742	IMDH2_MOUSE,PRPS2_MOUSE,KPRB_MOUSE,PUR2_MOUSE,KPRA_MOUSE,Q8CIH9_MOUSE	Impdh2,Prps2,Prpsap2,Gart,Prpsap1,Ppat	3	BP
GO:0051028	mRNA transport	47180	197	1434	15	0.0761421	0.00108999	2.96258	0.115742	QKI_MOUSE,H7BX95_MOUSE,FUBP2_MOUSE,Q6AXB7_MOUSE,NUP62_MOUSE,NXT2_MOUSE,SEC13_MOUSE,KIF5C_MOUSE,NCBP3_MOUSE,NUP93_MOUSE,IF4A3_MOUSE,A0A0G2JFX7_MOUSE,G3X9H5_MOUSE,CETN2_MOUSE,NUP85_MOUSE	Qki,Srsf1,Khsrp,Fmr1,Nup62,Nxt2,Sec13,Kif5c,Ncbp3,Nup93,Eif4a3,Rbm8a,Htt,Cetn2,Nup85	3	BP
GO:0009083	branched-chain amino acid catabolic process	47180	41	1434	6	0.146341	0.00141094	2.85049	0.140284	ODBB_MOUSE,Q3U3J1_MOUSE,3HIDH_MOUSE,A0A1B0GX27_MOUSE,A0A0U1RNL7_MOUSE,A0A0R4J023_MOUSE	Bckdhb,Bckdha,Hibadh,Bcat2,Bckdk,Auh	3	BP
GO:0006635	fatty acid beta-oxidation	47180	126	1434	11	0.0873016	0.00165538	2.7811	0.15248	THIC_MOUSE,DECR_MOUSE,ACADM_MOUSE,CPT1C_MOUSE,ECI1_MOUSE,HCDH_MOUSE,ECHD1_MOUSE,A0A0R4J023_MOUSE,D3Z600_MOUSE,OCTC_MOUSE,CPT1A_MOUSE	Acat2,Decr1,Acadm,Cpt1c,Eci1,Hadh,Echdc1,Auh,Pex5,Crot,Cpt1a	3	BP
GO:0007416	synapse assembly	47180	206	557	9	0.0436893	0.000829275	3.0813	0.113155	CRKL_MOUSE,NRX2A_MOUSE,ADDB_MOUSE,GPM6A_MOUSE,M0QWP1_MOUSE,A0A0A0MQC7_MOUSE,Q68FG2_MOUSE,A2AGI2_MOUSE,CADM1_MOUSE	Crkl,Nrxn2,Add2,Gpm6a,Agrn,Mapt,Sptbn2,Nlgn3,Cadm1	6	BP
GO:0017157	regulation of exocytosis	47180	102	557	6	0.0588235	0.00136402	2.86518	0.14317	STX1B_MOUSE,B0QZN5_MOUSE,A0A5F8MP96_MOUSE,A0A338P769_MOUSE,RALA_MOUSE,D3YZ62_MOUSE	Stx1b,Vamp2,Septin4,Septin5,Rala,Myo5a	6	BP
GO:0061732	mitochondrial acetyl-CoA biosynthetic process from pyruvate	47180	15	557	3	0.2	0.000669936	3.17397	0.107544	ODPX_MOUSE,ODPB_MOUSE,D3YWY6_MOUSE	Pdhx,Pdhb,Mpc1	6	BP
GO:0051491	positive regulation of filopodium assembly	47180	127	557	7	0.0551181	0.000813192	3.08981	0.113155	CDC42_MOUSE,B1AR74_MOUSE,RALA_MOUSE,GPM6A_MOUSE,A2ANL9_MOUSE,M0QWP1_MOUSE,P85A_MOUSE	Cdc42,Bcas3,Rala,Gpm6a,Tenm1,Agrn,Pik3r1	6	BP
GO:0007015	actin filament organization	47180	472	557	14	0.029661	0.00165918	2.78011	0.161073	CDC42_MOUSE,RHOF_MOUSE,RHOB_MOUSE,RHG17_MOUSE,TMOD2_MOUSE,F8WID5_MOUSE,DREB_MOUSE,D3Z2H9_MOUSE,RHOG_MOUSE,SHPS1_MOUSE,D3YZ62_MOUSE,TYB4_MOUSE,COR1C_MOUSE,D3Z6I8_MOUSE	Cdc42,Rhof,Rhob,Arhgap17,Tmod2,Tpm1,Dbn1,Tpm3-rs7,Rhog,Sirpa,Myo5a,Tmsb4x,Coro1c,Tpm3	6	BP
GO:0048488	synaptic vesicle endocytosis	47180	176	557	9	0.0511364	0.000265752	3.57552	0.0805818	K1109_MOUSE,B0QZN5_MOUSE,TBC24_MOUSE,A0A0R4J2C2_MOUSE,SH3G2_MOUSE,E9QLK9_MOUSE,F7BQW7_MOUSE,A0A668KM31_MOUSE,A2AGI2_MOUSE	Kiaa1109,Vamp2,Tbc1d24,Syt2,Sh3gl2,Snap91,Synj1,Amph,Nlgn3	6	BP
GO:0051260	protein homooligomerization	47180	254	557	11	0.0433071	0.000245619	3.60974	0.0805818	A0A3B2WC92_MOUSE,KCNA2_MOUSE,KCTD8_MOUSE,HEM2_MOUSE,TCP4_MOUSE,EHD1_MOUSE,KCD16_MOUSE,ATLA3_MOUSE,A0A0A0MQC7_MOUSE,A0A171KXD3_MOUSE,ATLA1_MOUSE	Spast,Kcna2,Kctd8,Alad,Sub1,Ehd1,Kctd16,Atl3,Mapt,Prmt1,Atl1	6	BP
GO:1905653	positive regulation of artery morphogenesis	47180	3	557	2	0.666667	0.000414119	3.38287	0.0869331	MK_MOUSE,AKT3_MOUSE	Mdk,Akt3	6	BP
GO:0007626	locomotory behavior	47180	371	557	12	0.032345	0.00171166	2.76658	0.161073	FIG4_MOUSE,A2AJ26_MOUSE,CKAP5_MOUSE,CALB1_MOUSE,LYAG_MOUSE,ARLY_MOUSE,APBA1_MOUSE,SCN8A_MOUSE,HPRT_MOUSE,S4R1C4_MOUSE,A2AIR9_MOUSE,A0A1B0GSA5_MOUSE	Fig4,Abca2,Ckap5,Calb1,Gaa,Asl,Apba1,Scn8a,Hprt1,Atp2b2,Cacna1b,Ddhd2	6	BP
GO:0032956	regulation of actin cytoskeleton organization	47180	250	557	12	0.048	4.90938e-05	4.30897	0.0791779	D3Z6D2_MOUSE,RHOF_MOUSE,RHOB_MOUSE,RHG17_MOUSE,ILK_MOUSE,PAK3_MOUSE,RHOG_MOUSE,A0A3Q4EGR2_MOUSE,DEMA_MOUSE,COR2B_MOUSE,GPM6B_MOUSE,A0A6I8MX08_MOUSE	Stau2,Rhof,Rhob,Arhgap17,Ilk,Pak3,Rhog,Rock1,Dmtn,Coro2b,Gpm6b,Ccdc88a	6	BP
GO:0120183	positive regulation of focal adhesion disassembly	47180	33	557	4	0.121212	0.000599334	3.22233	0.102224	A0A0A6YW53_MOUSE,D3YYK8_MOUSE,P85A_MOUSE,A0A1D5RM83_MOUSE	Map4k4,Mapre2,Pik3r1,Iqsec1	6	BP
GO:0019322	pentose biosynthetic process	47180	3	557	2	0.666667	0.000414119	3.38287	0.0869331	G6PD1_MOUSE,6PGD_MOUSE	G6pdx,Pgd	6	BP
GO:0006233	dTDP biosynthetic process	47180	3	557	2	0.666667	0.000414119	3.38287	0.0869331	CMPK2_MOUSE,KTHY_MOUSE	Cmpk2,Dtymk	6	BP
GO:0045634	regulation of melanocyte differentiation	47180	2	557	2	1	0.000139131	3.85658	0.0805818	GNAQ_MOUSE,GNA11_MOUSE	Gnaq,Gna11	6	BP
GO:0002926	tRNA wobble base 5-methoxycarbonylmethyl-2-thiouridinylation	47180	3	557	2	0.666667	0.000414119	3.38287	0.0869331	A0A286YDB8_MOUSE,ELP1_MOUSE	Elp3,Elp1	6	BP
GO:0046390	ribose phosphate biosynthetic process	47180	5	557	2	0.4	0.00135886	2.86682	0.14317	TKT_MOUSE,G6PD1_MOUSE	Tkt,G6pdx	6	BP
GO:0003433	chondrocyte development involved in endochondral bone morphogenesis	47180	5	557	2	0.4	0.00135886	2.86682	0.14317	NSMA2_MOUSE,SERPH_MOUSE	Smpd3,Serpinh1	6	BP
GO:0010975	regulation of neuron projection development	47180	132	557	8	0.0606061	0.000183845	3.73555	0.0805818	NDEL1_MOUSE,PAK3_MOUSE,GSK3A_MOUSE,DPYL2_MOUSE,G3UWV4_MOUSE,MARK1_MOUSE,Q6NXL5_MOUSE,A0A6I8MX08_MOUSE	Ndel1,Pak3,Gsk3a,Dpysl2,Brsk2,Mark1,Acap3,Ccdc88a	6	BP
GO:0048066	developmental pigmentation	47180	44	557	4	0.0909091	0.00179501	2.74593	0.163286	GNAQ_MOUSE,H9H9S3_MOUSE,GNA11_MOUSE,D3YZ62_MOUSE	Gnaq,Zeb2,Gna11,Myo5a	6	BP
GO:1904825	protein localization to microtubule plus-end	47180	14	557	3	0.214286	0.00054068	3.26706	0.102224	GA2L1_MOUSE,D3YYK8_MOUSE,MARE3_MOUSE	Gas2l1,Mapre2,Mapre3	6	BP
GO:0031110	regulation of microtubule polymerization or depolymerization	47180	60	557	5	0.0833333	0.000720701	3.14224	0.109266	GA2L1_MOUSE,STMN1_MOUSE,D3YYK8_MOUSE,MARE3_MOUSE,A0A0A0MQC7_MOUSE	Gas2l1,Stmn1,Mapre2,Mapre3,Mapt	6	BP
GO:0006637	acyl-CoA metabolic process	47180	71	557	5	0.0704225	0.00154537	2.81097	0.156197	SCP2_MOUSE,A2AVR6_MOUSE,E9PYH2_MOUSE,ACOT9_MOUSE,HMGCL_MOUSE	Scp2,Acot11,Acot7,Acot9,Hmgcl	6	BP
GO:0008277	regulation of G protein-coupled receptor signaling pathway	47180	120	557	7	0.0583333	0.000580861	3.23593	0.102224	KCTD8_MOUSE,RGS14_MOUSE,Q5F2D9_MOUSE,ITB1_MOUSE,KCD16_MOUSE,PHF24_MOUSE,GPSM1_MOUSE	Kctd8,Rgs14,Arrb2,Itgb1,Kctd16,Phf24,Gpsm1	6	BP
GO:0008089	anterograde axonal transport	47180	102	557	7	0.0686275	0.0002162	3.66515	0.0805818	A0A3B2WC92_MOUSE,AP3D1_MOUSE,AP3B1_MOUSE,G3UW47_MOUSE,AP3M2_MOUSE,NFL_MOUSE,ARL8A_MOUSE	Spast,Ap3d1,Ap3b1,Kif1a,Ap3m2,Nefl,Arl8a	6	BP
GO:0006098	pentose-phosphate shunt	47180	23	557	4	0.173913	0.000142386	3.84653	0.0805818	TKT_MOUSE,G6PD1_MOUSE,TALDO_MOUSE,6PGD_MOUSE	Tkt,G6pdx,Taldo1,Pgd	6	BP
GO:1902635	1-phosphatidyl-1D-myo-inositol 4,5-bisphosphate biosynthetic process	47180	5	557	2	0.4	0.00135886	2.86682	0.14317	PI42B_MOUSE,PI42C_MOUSE	Pip4k2b,Pip4k2c	6	BP
GO:0090217	negative regulation of 1-phosphatidylinositol-4-phosphate 5-kinase activity	47180	5	557	2	0.4	0.00135886	2.86682	0.14317	PI42B_MOUSE,PI42C_MOUSE	Pip4k2b,Pip4k2c	6	BP
GO:0060996	dendritic spine development	47180	74	401	5	0.0675676	0.000430746	3.36578	0.0537524	EPHB3_MOUSE,ACSL4_MOUSE,KCC2A_MOUSE,PAK2_MOUSE,G5E884_MOUSE	Ephb3,Acsl4,Camk2a,Pak2,Pak1	1	BP
GO:0006888	endoplasmic reticulum to Golgi vesicle-mediated transport	47180	307	401	14	0.0456026	4.85052e-07	6.31421	0.000534042	A0A140LHN0_MOUSE,SAR1B_MOUSE,E9PUQ5_MOUSE,E9QNT8_MOUSE,TMEDA_MOUSE,E9Q7G1_MOUSE,VAPB_MOUSE,Q91XH6_MOUSE,SC31A_MOUSE,TERA_MOUSE,USO1_MOUSE,COPG2_MOUSE,PDCD6_MOUSE,RAB1B_MOUSE	Yif1b,Sar1b,Golga2,Ank1,Tmed10,Tmed7,Vapb,Vti1b,Sec31a,Vcp,Uso1,Copg2,Pdcd6,Rab1b	1	BP
GO:0050770	regulation of axonogenesis	47180	98	401	6	0.0612245	0.000197896	3.70356	0.0394457	EPHB3_MOUSE,LRC4C_MOUSE,RHG35_MOUSE,PAK2_MOUSE,G5E884_MOUSE,E9PYX3_MOUSE	Ephb3,Lrrc4c,Arhgap35,Pak2,Pak1,Mark2	1	BP
GO:0097062	dendritic spine maintenance	47180	29	401	3	0.103448	0.00188972	2.7236	0.110129	PICK1_MOUSE,SRC8_MOUSE,IP3KA_MOUSE	Pick1,Cttn,Itpka	1	BP
GO:1900271	regulation of long-term synaptic potentiation	47180	43	401	4	0.0930233	0.000488215	3.31139	0.0537524	CALB2_MOUSE,CP46A_MOUSE,G5E884_MOUSE,RAB3A_MOUSE	Calb2,Cyp46a1,Pak1,Rab3a	1	BP
GO:0016197	endosomal transport	47180	177	401	7	0.039548	0.000846511	3.07237	0.0745607	EHD4_MOUSE,SNP25_MOUSE,ITSN2_MOUSE,PICAL_MOUSE,VPS16_MOUSE,D3Z2E3_MOUSE,RHG01_MOUSE	Ehd4,Snap25,Itsn2,Picalm,Vps16,Reps1,Arhgap1	1	BP
GO:1902600	proton transmembrane transport	47180	93	401	6	0.0645161	0.000148492	3.8283	0.0363454	COX15_MOUSE,VATE1_MOUSE,A0A0G2JGX4_MOUSE,ATPB_MOUSE,VATB2_MOUSE,VATA_MOUSE	Cox15,Atp6v1e1,Atp1a3,Atp5f1b,Atp6v1b2,Atp6v1a	1	BP
GO:1903078	positive regulation of protein localization to plasma membrane	47180	181	401	8	0.0441989	0.000173008	3.76193	0.0380964	E9Q828_MOUSE,A0A286YCI8_MOUSE,H7BWY4_MOUSE,NRX1A_MOUSE,PTN9_MOUSE,E9QN98_MOUSE,ARP3_MOUSE,RER1_MOUSE	Atp2b4,Sorbs1,Dlg1,Nrxn1,Ptpn9,Dpp10,Actr3,Rer1	1	BP
GO:0032981	mitochondrial respiratory chain complex I assembly	47180	139	401	8	0.057554	2.71418e-05	4.56636	0.0138698	NDUB1_MOUSE,NDUA8_MOUSE,NDUAA_MOUSE,NDUS8_MOUSE,NDUF2_MOUSE,BCS1_MOUSE,A0A0R3P9C8_MOUSE,NDUA6_MOUSE	Ndufb1,Ndufa8,Ndufa10,Ndufs8,Ndufaf2,Bcs1l,Ndufa9,Ndufa6	1	BP
GO:0006541	glutamine metabolic process	47180	49	401	4	0.0816327	0.000805269	3.09406	0.0738834	GLSK_MOUSE,GUAA_MOUSE,DHE3_MOUSE,SERA_MOUSE	Gls,Gmps,Glud1,Phgdh	1	BP
GO:0061003	positive regulation of dendritic spine morphogenesis	47180	115	401	6	0.0521739	0.000468848	3.32897	0.0537524	LIS1_MOUSE,E9Q9C3_MOUSE,ARP3_MOUSE,ARP2_MOUSE,CSKP_MOUSE,IP3KA_MOUSE	Pafah1b1,Afdn,Actr3,Actr2,Cask,Itpka	1	BP
GO:0007017	microtubule-based process	47180	58	401	4	0.0689655	0.00151864	2.81854	0.101335	TBB4B_MOUSE,TBB5_MOUSE,PFD3_MOUSE,LIS1_MOUSE	Tubb4b,Tubb5,Vbp1,Pafah1b1	1	BP
GO:0030100	regulation of endocytosis	47180	118	401	6	0.0508475	0.000537514	3.26961	0.0563622	EHD4_MOUSE,RIT2_MOUSE,A0A0A0MQE8_MOUSE,Q3TGS7_MOUSE,PICAL_MOUSE,HIP1R_MOUSE	Ehd4,Rit2,Arhgap21,Snx12,Picalm,Hip1r	1	BP
GO:0006749	glutathione metabolic process	47180	163	401	9	0.0552147	1.19708e-05	4.92188	0.00878656	ETHE1_MOUSE,GPX4_MOUSE,PRAF3_MOUSE,IDHC_MOUSE,GDAP1_MOUSE,EF1G_MOUSE,GSTO1_MOUSE,A0A0A6YY34_MOUSE,MAAI_MOUSE	Ethe1,Gpx4,Arl6ip5,Idh1,Gdap1,Eef1g,Gsto1,Gpx1,Gstz1	1	BP
GO:0099170	postsynaptic modulation of chemical synaptic transmission	47180	26	401	3	0.115385	0.00137022	2.86321	0.0973299	CANB1_MOUSE,GRM5_MOUSE,PLCB1_MOUSE	Ppp3r1,Grm5,Plcb1	1	BP
GO:0072583	clathrin-dependent endocytosis	47180	80	401	6	0.075	6.42183e-05	4.19234	0.0202013	SAC2_MOUSE,AP2A1_MOUSE,AP2A2_MOUSE,PICAL_MOUSE,AP2B1_MOUSE,CLH1_MOUSE	Inpp5f,Ap2a1,Ap2a2,Picalm,Ap2b1,Cltc	1	BP
GO:0048268	clathrin coat assembly	47180	82	401	5	0.0609756	0.000690309	3.16096	0.0678306	PICAL_MOUSE,Q5SUH7_MOUSE,AP2B1_MOUSE,HIP1R_MOUSE,CLH1_MOUSE	Picalm,Clint1,Ap2b1,Hip1r,Cltc	1	BP
GO:0006898	receptor-mediated endocytosis	47180	208	401	8	0.0384615	0.000440902	3.35566	0.0537524	AP2A1_MOUSE,AP2A2_MOUSE,SRC8_MOUSE,PICAL_MOUSE,ATPB_MOUSE,D3Z2E3_MOUSE,HIP1R_MOUSE,CLH1_MOUSE	Ap2a1,Ap2a2,Cttn,Picalm,Atp5f1b,Reps1,Hip1r,Cltc	1	BP
GO:0099590	neurotransmitter receptor internalization	47180	16	401	3	0.1875	0.00031432	3.50263	0.0461421	SNP25_MOUSE,CCG2_MOUSE,AP2B1_MOUSE	Snap25,Cacng2,Ap2b1	1	BP
GO:0048211	Golgi vesicle docking	47180	5	401	2	0.4	0.000708494	3.14966	0.0678306	NSF_MOUSE,USO1_MOUSE	Nsf,Uso1	1	BP
GO:1902618	cellular response to fluoride	47180	3	401	2	0.666667	0.000214963	3.66764	0.0394457	PLCB1_MOUSE,CO1A1_MOUSE	Plcb1,Col1a1	1	BP
GO:0033206	meiotic cytokinesis	47180	8	401	2	0.25	0.00195051	2.70985	0.110129	ARP3_MOUSE,ARP2_MOUSE	Actr3,Actr2	1	BP
GO:0008356	asymmetric cell division	47180	23	401	3	0.130435	0.000951116	3.02177	0.0775688	E9PUQ5_MOUSE,ARP3_MOUSE,ARP2_MOUSE	Golga2,Actr3,Actr2	1	BP
GO:2001260	regulation of semaphorin-plexin signaling pathway	47180	8	401	2	0.25	0.00195051	2.70985	0.110129	A0A0A6YY91_MOUSE,E9QB01_MOUSE	Ncam1,Ncam1	1	BP
GO:0006886	intracellular protein transport	47180	853	401	30	0.03517	8.67692e-11	10.0616	1.91066e-07	PICK1_MOUSE,SAR1B_MOUSE,A0A3Q4EI12_MOUSE,Q6NZD2_MOUSE,ARF3_MOUSE,TBC9B_MOUSE,AP2A1_MOUSE,RAB2A_MOUSE,TMEDA_MOUSE,SORC2_MOUSE,NSF_MOUSE,E9Q7G1_MOUSE,AP2A2_MOUSE,Q8BH40_MOUSE,Q91XH6_MOUSE,SRC8_MOUSE,RBGP1_MOUSE,VP26A_MOUSE,SC31A_MOUSE,AP2B1_MOUSE,E9QKZ2_MOUSE,A0A286YDR2_MOUSE,TBC17_MOUSE,VPS16_MOUSE,AP3S1_MOUSE,USO1_MOUSE,COPG2_MOUSE,PDCD6_MOUSE,RAB1B_MOUSE,CLH1_MOUSE	Pick1,Sar1b,Rab18,Snx1,Arf3,Tbc1d9b,Ap2a1,Rab2a,Tmed10,Sorcs2,Nsf,Tmed7,Ap2a2,Stx7,Vti1b,Cttn,Rabgap1,Vps26a,Sec31a,Ap2b1,Ipo9,Rab3c,Tbc1d17,Vps16,Ap3s1,Uso1,Copg2,Pdcd6,Rab1b,Cltc	1	BP
GO:0009448	gamma-aminobutyric acid metabolic process	47180	7	401	2	0.285714	0.00147115	2.83234	0.101233	SSDH_MOUSE,SERA_MOUSE	Aldh5a1,Phgdh	1	BP
GO:0031161	phosphatidylinositol catabolic process	47180	8	401	2	0.25	0.00195051	2.70985	0.110129	SAC2_MOUSE,PLCB1_MOUSE	Inpp5f,Plcb1	1	BP
GO:0007413	axonal fasciculation	47180	59	401	5	0.0847458	0.000148551	3.82813	0.0363454	EPHB3_MOUSE,RHG35_MOUSE,NCAM2_MOUSE,A0A0A6YY91_MOUSE,E9QB01_MOUSE	Ephb3,Arhgap35,Ncam2,Ncam1,Ncam1	1	BP
GO:0099553	trans-synaptic signaling by endocannabinoid, modulating synaptic transmission	47180	8	401	2	0.25	0.00195051	2.70985	0.110129	G5E884_MOUSE,GRM5_MOUSE	Pak1,Grm5	1	BP
GO:0098712	L-glutamate import across plasma membrane	47180	16	401	3	0.1875	0.00031432	3.50263	0.0461421	GRM1_MOUSE,PRAF3_MOUSE,EAA2_MOUSE	Grm1,Arl6ip5,Slc1a2	1	BP
GO:0071218	cellular response to misfolded protein	47180	25	401	3	0.12	0.00121977	2.91372	0.0895308	CHIP_MOUSE,DJB14_MOUSE,DJB12_MOUSE	Stub1,Dnajb14,Dnajb12	1	BP
GO:0030433	ubiquitin-dependent ERAD pathway	47180	240	401	9	0.0375	0.000236708	3.62579	0.0400948	FBX2_MOUSE,CHIP_MOUSE,DJB14_MOUSE,UFD1_MOUSE,TERA_MOUSE,UBE4B_MOUSE,CCD47_MOUSE,DJB12_MOUSE,ERLN2_MOUSE	Fbxo2,Stub1,Dnajb14,Ufd1,Vcp,Ube4b,Ccdc47,Dnajb12,Erlin2	1	BP
GO:0007216	G protein-coupled glutamate receptor signaling pathway	47180	52	401	4	0.0769231	0.00100855	2.9963	0.0793154	GRM1_MOUSE,GRM7_MOUSE,HOME1_MOUSE,GRM5_MOUSE	Grm1,Grm7,Homer1,Grm5	1	BP
GO:1903076	regulation of protein localization to plasma membrane	47180	92	401	5	0.0543478	0.00116112	2.93512	0.0881654	RACK1_MOUSE,KCC2A_MOUSE,A0A0G2JGS4_MOUSE,Q8BH40_MOUSE,Q91XH6_MOUSE	Rack1,Camk2a,Camk2d,Stx7,Vti1b	1	BP
GO:0051966	regulation of synaptic transmission, glutamatergic	47180	101	401	5	0.049505	0.0017577	2.75506	0.110129	GRM1_MOUSE,GRM7_MOUSE,HOME1_MOUSE,GRM5_MOUSE,KAPCA_MOUSE	Grm1,Grm7,Homer1,Grm5,Prkaca	1	BP
GO:0006897	endocytosis	47180	595	310	13	0.0218487	0.000182132	3.73961	0.0230739	NDKA_MOUSE,KC1E_MOUSE,SYPH_MOUSE,E9PUD2_MOUSE,E9QLL2_MOUSE,DNM1L_MOUSE,AP2M1_MOUSE,RAB5A_MOUSE,A0A0J9YUN4_MOUSE,EHD3_MOUSE,SH3K1_MOUSE,S4R2T7_MOUSE,MTMR6_MOUSE	Nme1,Csnk1e,Syp,Dnm1l,Dnm3,Dnm1l,Ap2m1,Rab5a,Dnm1,Ehd3,Sh3kbp1,Ank2,Mtmr6	4	BP
GO:0098885	modification of postsynaptic actin cytoskeleton	47180	32	310	3	0.09375	0.00120993	2.91724	0.0510941	COF1_MOUSE,WASF3_MOUSE,PROF2_MOUSE	Cfl1,Wasf3,Pfn2	4	BP
GO:0008360	regulation of cell shape	47180	486	310	12	0.0246914	0.000104669	3.98018	0.0163203	RHBT2_MOUSE,E41L3_MOUSE,ANXA7_MOUSE,ALDOA_MOUSE,WASF3_MOUSE,NHRF1_MOUSE,COR1A_MOUSE,RADI_MOUSE,EZRI_MOUSE,B1AZ46_MOUSE,SH3K1_MOUSE,ERMIN_MOUSE	Rhobtb2,Epb41l3,Anxa7,Aldoa,Wasf3,Slc9a3r1,Coro1a,Rdx,Ezr,Baiap2,Sh3kbp1,Ermn	4	BP
GO:0008637	apoptotic mitochondrial changes	47180	69	310	4	0.057971	0.00112954	2.9471	0.0497733	NDUS1_MOUSE,CH60_MOUSE,PP2AB_MOUSE,ADT1_MOUSE	Ndufs1,Hspd1,Ppp2cb,Slc25a4	4	BP
GO:0045921	positive regulation of exocytosis	47180	103	310	5	0.0485437	0.000613639	3.21209	0.031362	STX1A_MOUSE,FIBG_MOUSE,STXB1_MOUSE,RAB5A_MOUSE,Q4VA93_MOUSE	Stx1a,Fgg,Stxbp1,Rab5a,Prkca	4	BP
GO:0006086	acetyl-CoA biosynthetic process from pyruvate	47180	5	310	2	0.4	0.00042475	3.37187	0.0304934	ODP2_MOUSE,ODPA_MOUSE	Dlat,Pdha1	4	BP
GO:0006099	tricarboxylic acid cycle	47180	76	310	9	0.118421	1.96885e-09	8.70579	1.70307e-06	SDHA_MOUSE,ODP2_MOUSE,B2RXT3_MOUSE,A0A1L1STE6_MOUSE,ACON_MOUSE,ODO1_MOUSE,ODPA_MOUSE,IDHG1_MOUSE,CISY_MOUSE	Sdha,Dlat,Ogdhl,Idh3a,Aco2,Ogdh,Pdha1,Idh3g,Cs	4	BP
GO:1904666	regulation of ubiquitin protein ligase activity	47180	8	310	2	0.25	0.00117387	2.93038	0.0506264	E9PUD2_MOUSE,DNM1L_MOUSE	Dnm1l,Dnm1l	4	BP
GO:0048488	synaptic vesicle endocytosis	47180	176	310	12	0.0681818	2.52057e-09	8.5985	1.70307e-06	STX1A_MOUSE,SYPH_MOUSE,E9PUD2_MOUSE,E9QLL2_MOUSE,DNM1L_MOUSE,AP2M1_MOUSE,SYUB_MOUSE,SNAB_MOUSE,A0A0J9YUN4_MOUSE,SYT1_MOUSE,PACN1_MOUSE,SYT5_MOUSE	Stx1a,Syp,Dnm1l,Dnm3,Dnm1l,Ap2m1,Sncb,Napb,Dnm1,Syt1,Pacsin1,Syt5	4	BP
GO:0014012	peripheral nervous system axon regeneration	47180	10	310	2	0.2	0.00187025	2.7281	0.0642542	MAP1B_MOUSE,TENA_MOUSE	Map1b,Tnc	4	BP
GO:1903146	regulation of autophagy of mitochondrion	47180	23	310	3	0.130435	0.000451309	3.34553	0.0304934	VDAC1_MOUSE,E9PUD2_MOUSE,DNM1L_MOUSE	Vdac1,Dnm1l,Dnm1l	4	BP
GO:0006102	isocitrate metabolic process	47180	23	310	3	0.130435	0.000451309	3.34553	0.0304934	A0A1L1STE6_MOUSE,ACON_MOUSE,IDHG1_MOUSE	Idh3a,Aco2,Idh3g	4	BP
GO:0042776	mitochondrial ATP synthesis coupled proton transport	47180	19	310	7	0.368421	2.32679e-11	10.6332	4.71641e-08	ATP5I_MOUSE,ATP5E_MOUSE,ATP5H_MOUSE,AT5F1_MOUSE,ATPA_MOUSE,ATPD_MOUSE,ATPO_MOUSE	Atp5me,Atp5f1e,Atp5pd,Atp5pb,Atp5f1a,Atp5f1d,Atp5po	4	BP
GO:0043524	negative regulation of neuron apoptotic process	47180	527	310	14	0.0265655	1.26416e-05	4.8982	0.00284718	STXB1_MOUSE,MAG_MOUSE,COR1A_MOUSE,PTPRZ_MOUSE,SYUB_MOUSE,PRDX3_MOUSE,PARK7_MOUSE,CH60_MOUSE,APOE_MOUSE,G6PI_MOUSE,PRDX2_MOUSE,MT3_MOUSE,RASK_MOUSE,MT1_MOUSE	Stxbp1,Mag,Coro1a,Ptprz1,Sncb,Prdx3,Park7,Hspd1,Apoe,Gpi,Prdx2,Mt3,Kras,Mt1	4	BP
GO:0007263	nitric oxide mediated signal transduction	47180	27	310	3	0.111111	0.000731037	3.13606	0.0352813	MT2_MOUSE,APOE_MOUSE,MT1_MOUSE	Mt2,Apoe,Mt1	4	BP
GO:0003374	dynamin family protein polymerization involved in mitochondrial fission	47180	33	310	4	0.121212	6.43621e-05	4.19137	0.0108718	E9PUD2_MOUSE,E9QLL2_MOUSE,DNM1L_MOUSE,A0A0J9YUN4_MOUSE	Dnm1l,Dnm3,Dnm1l,Dnm1	4	BP
GO:1903423	positive regulation of synaptic vesicle recycling	47180	24	310	3	0.125	0.00051328	3.28965	0.031362	E9QLL2_MOUSE,PLAP_MOUSE,A0A0J9YUN4_MOUSE	Dnm3,Plaa,Dnm1	4	BP
GO:0061621	canonical glycolysis	47180	28	310	3	0.107143	0.000814796	3.08895	0.0384091	ENOA_MOUSE,Q8C605_MOUSE,G6PI_MOUSE	Eno1,Pfkp,Gpi	4	BP
GO:0061025	membrane fusion	47180	102	310	5	0.0490196	0.000586969	3.23139	0.031362	E9PUD2_MOUSE,ANXA7_MOUSE,E9QLL2_MOUSE,DNM1L_MOUSE,A0A0J9YUN4_MOUSE	Dnm1l,Anxa7,Dnm3,Dnm1l,Dnm1	4	BP
GO:0090149	mitochondrial membrane fission	47180	5	310	2	0.4	0.00042475	3.37187	0.0304934	E9PUD2_MOUSE,DNM1L_MOUSE	Dnm1l,Dnm1l	4	BP
GO:0036466	synaptic vesicle recycling via endosome	47180	9	310	2	0.222222	0.00150272	2.82312	0.0597256	E9PUD2_MOUSE,DNM1L_MOUSE	Dnm1l,Dnm1l	4	BP
GO:0006103	2-oxoglutarate metabolic process	47180	41	310	5	0.121951	7.31961e-06	5.13551	0.00185461	B2RXT3_MOUSE,A0A1L1STE6_MOUSE,ODO1_MOUSE,AATM_MOUSE,IDHG1_MOUSE	Ogdhl,Idh3a,Ogdh,Got2,Idh3g	4	BP
GO:0045956	positive regulation of calcium ion-dependent exocytosis	47180	57	310	4	0.0701754	0.000548943	3.26047	0.031362	KCNB1_MOUSE,STX1A_MOUSE,STXB1_MOUSE,SYT1_MOUSE	Kcnb1,Stx1a,Stxbp1,Syt1	4	BP
GO:0006096	glycolytic process	47180	127	310	8	0.0629921	2.16162e-06	5.66522	0.000730268	ALDOA_MOUSE,ODO1_MOUSE,ENOA_MOUSE,KPYM_MOUSE,TPIS_MOUSE,Q8C605_MOUSE,G6PI_MOUSE,A0A0A0MQF6_MOUSE	Aldoa,Ogdh,Eno1,Pkm,Tpi1,Pfkp,Gpi,Gapdh	4	BP
GO:0044794	positive regulation by host of viral process	47180	19	310	3	0.157895	0.000251786	3.59897	0.0259418	COF1_MOUSE,PPIB_MOUSE,APOE_MOUSE	Cfl1,Ppib,Apoe	4	BP
GO:0015986	ATP synthesis coupled proton transport	47180	21	310	6	0.285714	3.82891e-09	8.41693	1.9403e-06	ATP5E_MOUSE,ATP5H_MOUSE,AT5F1_MOUSE,ATPA_MOUSE,ATPD_MOUSE,ATPO_MOUSE	Atp5f1e,Atp5pd,Atp5pb,Atp5f1a,Atp5f1d,Atp5po	4	BP
GO:0045321	leukocyte activation	47180	6	310	2	0.333333	0.000634357	3.19767	0.031362	PRDX1_MOUSE,PRDX2_MOUSE	Prdx1,Prdx2	4	BP
GO:0140300	serine import into mitochondrion	47180	6	310	2	0.333333	0.000634357	3.19767	0.031362	SFXN1_MOUSE,SFXN3_MOUSE	Sfxn1,Sfxn3	4	BP
GO:2000277	positive regulation of oxidative phosphorylation uncoupler activity	47180	6	310	2	0.333333	0.000634357	3.19767	0.031362	PARK7_MOUSE,ADT1_MOUSE	Park7,Slc25a4	4	BP
GO:1904579	cellular response to thapsigargin	47180	6	310	2	0.333333	0.000634357	3.19767	0.031362	E9PUD2_MOUSE,DNM1L_MOUSE	Dnm1l,Dnm1l	4	BP
GO:0010273	detoxification of copper ion	47180	16	310	4	0.25	3.12623e-06	5.50498	0.000905266	MT2_MOUSE,PARK7_MOUSE,MT3_MOUSE,MT1_MOUSE	Mt2,Park7,Mt3,Mt1	4	BP
GO:0007412	axon target recognition	47180	6	310	2	0.333333	0.000634357	3.19767	0.031362	STXB1_MOUSE,UCHL1_MOUSE	Stxbp1,Uchl1	4	BP
GO:0034111	negative regulation of homotypic cell-cell adhesion	47180	9	310	2	0.222222	0.00150272	2.82312	0.0597256	MP2K1_MOUSE,RADI_MOUSE	Map2k1,Rdx	4	BP
GO:1903578	regulation of ATP metabolic process	47180	4	310	2	0.5	0.000255963	3.59182	0.0259418	E9PUD2_MOUSE,DNM1L_MOUSE	Dnm1l,Dnm1l	4	BP
GO:0097214	positive regulation of lysosomal membrane permeability	47180	10	310	2	0.2	0.00187025	2.7281	0.0642542	HSP7C_MOUSE,MT3_MOUSE	Hspa8,Mt3	4	BP
GO:0048026	positive regulation of mRNA splicing, via spliceosome	47180	94	310	5	0.0531915	0.000403675	3.39397	0.0304934	PRP19_MOUSE,F8WJG3_MOUSE,CELF4_MOUSE,HSP7C_MOUSE,Q8BG13_MOUSE	Prpf19,Tra2b,Celf4,Hspa8,Rbm3	4	BP
GO:0042407	cristae formation	47180	49	310	5	0.102041	1.78416e-05	4.74857	0.00328773	MIC25_MOUSE,MIC13_MOUSE,MIC26_MOUSE,MIC60_MOUSE,MIC19_MOUSE	Chchd6,Micos13,Apoo,Immt,Chchd3	4	BP
GO:1905395	response to flavonoid	47180	4	310	2	0.5	0.000255963	3.59182	0.0259418	E9PUD2_MOUSE,DNM1L_MOUSE	Dnm1l,Dnm1l	4	BP
GO:1902177	positive regulation of oxidative stress-induced intrinsic apoptotic signaling pathway	47180	10	310	2	0.2	0.00187025	2.7281	0.0642542	SFPQ_MOUSE,PARK7_MOUSE	Sfpq,Park7	4	BP
GO:1903861	positive regulation of dendrite extension	47180	130	310	5	0.0384615	0.0017383	2.75987	0.0642542	B2M1R6_MOUSE,E9PWP6_MOUSE,PLAP_MOUSE,SYT1_MOUSE,Q3UYN2_MOUSE	Hnrnpk,Rims1,Plaa,Syt1,Cpne6	4	BP
GO:0006904	vesicle docking involved in exocytosis	47180	80	310	4	0.05	0.00195316	2.70926	0.0659841	KCNB1_MOUSE,STXB1_MOUSE,RAB10_MOUSE,A2A7Z6_MOUSE	Kcnb1,Stxbp1,Rab10,Rab3b	4	BP
GO:0051592	response to calcium ion	47180	254	310	7	0.0275591	0.00154988	2.8097	0.0604154	GDIA_MOUSE,SAHH2_MOUSE,FIBG_MOUSE,ANXA7_MOUSE,ANXA5_MOUSE,PEBP1_MOUSE,SYT1_MOUSE	Gdi1,Ahcyl1,Fgg,Anxa7,Anxa5,Pebp1,Syt1	4	BP
GO:0050821	protein stabilization	47180	585	310	13	0.0222222	0.00015449	3.8111	0.0208768	STXB1_MOUSE,CALR_MOUSE,PARK7_MOUSE,TCPG_MOUSE,STX12_MOUSE,RL5_MOUSE,CH60_MOUSE,PPIB_MOUSE,A0A0A0MQF6_MOUSE,TCPB_MOUSE,S4R2T7_MOUSE,MT3_MOUSE,PROF2_MOUSE	Stxbp1,Calr,Park7,Cct3,Stx12,Rpl5,Hspd1,Ppib,Gapdh,Cct2,Ank2,Mt3,Pfn2	4	BP
GO:0045926	negative regulation of growth	47180	22	310	3	0.136364	0.000394356	3.40411	0.0304934	MT2_MOUSE,IDHG1_MOUSE,MT1_MOUSE	Mt2,Idh3g,Mt1	4	BP
GO:0050804	modulation of chemical synaptic transmission	47180	335	310	9	0.0268657	0.000414064	3.38293	0.0304934	PACN2_MOUSE,AKA7G_MOUSE,B2M1R6_MOUSE,KAP3_MOUSE,A0A0J9YUN4_MOUSE,NPTN_MOUSE,A4GZ26_MOUSE,B1AZ46_MOUSE,A2AFG7_MOUSE	Pacsin2,Akap7,Hnrnpk,Prkar2b,Dnm1,Nptn,Iqsec2,Baiap2,L1cam	4	BP
GO:0010807	regulation of synaptic vesicle priming	47180	24	310	3	0.125	0.00051328	3.28965	0.031362	STX1A_MOUSE,STXB1_MOUSE,SNAB_MOUSE	Stx1a,Stxbp1,Napb	4	BP
GO:1900244	positive regulation of synaptic vesicle endocytosis	47180	48	310	4	0.0833333	0.000283238	3.54785	0.0273392	E9PUD2_MOUSE,DNM1L_MOUSE,AP2M1_MOUSE,A0A0J9YUN4_MOUSE	Dnm1l,Dnm1l,Ap2m1,Dnm1	4	BP
GO:1902115	regulation of organelle assembly	47180	10	310	2	0.2	0.00187025	2.7281	0.0642542	RADI_MOUSE,EZRI_MOUSE	Rdx,Ezr	4	BP
GO:0006730	one-carbon metabolic process	47180	68	310	4	0.0588235	0.00106953	2.97081	0.0481765	SAHH2_MOUSE,SFXN1_MOUSE,SFXN3_MOUSE,CAH2_MOUSE	Ahcyl1,Sfxn1,Sfxn3,Ca2	4	BP
GO:0045454	cell redox homeostasis	47180	83	310	5	0.060241	0.000226434	3.64506	0.0259418	PRDX4_MOUSE,PRDX3_MOUSE,PRDX1_MOUSE,PRDX2_MOUSE,THIO_MOUSE	Prdx4,Prdx3,Prdx1,Prdx2,Txn	4	BP
GO:0072659	protein localization to plasma membrane	47180	567	310	13	0.0229277	0.000113752	3.94404	0.0164697	KCNB1_MOUSE,E41L3_MOUSE,STXB1_MOUSE,SPTB2_MOUSE,NHRF1_MOUSE,RADI_MOUSE,EZRI_MOUSE,EHD3_MOUSE,RAB10_MOUSE,A2A7Z6_MOUSE,PACN1_MOUSE,K3W4Q8_MOUSE,S4R2T7_MOUSE	Kcnb1,Epb41l3,Stxbp1,Sptbn1,Slc9a3r1,Rdx,Ezr,Ehd3,Rab10,Rab3b,Pacsin1,Bsg,Ank2	4	BP
GO:0016192	vesicle-mediated transport	47180	562	401	16	0.0284698	3.14936e-05	4.50178	0.0138698	SYT13_MOUSE,ARF3_MOUSE,AP2A1_MOUSE,RAB2A_MOUSE,NSF_MOUSE,AP2A2_MOUSE,Q8BH40_MOUSE,Q91XH6_MOUSE,PICAL_MOUSE,Q5SUH7_MOUSE,RTN3_MOUSE,AP2B1_MOUSE,G3X9Y1_MOUSE,MLC1_MOUSE,AP3S1_MOUSE,CLH1_MOUSE	Syt13,Arf3,Ap2a1,Rab2a,Nsf,Ap2a2,Stx7,Vti1b,Picalm,Clint1,Rtn3,Ap2b1,Syt3,Mlc1,Ap3s1,Cltc	1	BP
GO:0006979	response to oxidative stress	47180	376	310	9	0.0239362	0.000939183	3.02725	0.0432664	PRDX4_MOUSE,MP2K1_MOUSE,PEBP1_MOUSE,PRDX3_MOUSE,PARK7_MOUSE,PRDX1_MOUSE,APOE_MOUSE,PRDX2_MOUSE,MT3_MOUSE	Prdx4,Map2k1,Pebp1,Prdx3,Park7,Prdx1,Apoe,Prdx2,Mt3	4	BP
GO:0006457	protein folding	47180	263	310	8	0.0304183	0.000381687	3.41829	0.0304934	TBCD_MOUSE,AHSA1_MOUSE,CALR_MOUSE,TCPG_MOUSE,HSP7C_MOUSE,CH60_MOUSE,PPIB_MOUSE,TCPB_MOUSE	Tbcd,Ahsa1,Calr,Cct3,Hspa8,Hspd1,Ppib,Cct2	4	BP
GO:0042744	hydrogen peroxide catabolic process	47180	51	401	4	0.0784314	0.000937198	3.02817	0.0775688	PRDX5_MOUSE,Q91VB8_MOUSE,A0A0A6YY34_MOUSE,Q6GT24_MOUSE	Prdx5,Hba-a1,Gpx1,Prdx6	1	BP
GO:0046034	ATP metabolic process	47180	115	310	8	0.0695652	1.02108e-06	5.99094	0.000413946	ATP5I_MOUSE,ATP5H_MOUSE,KAD4_MOUSE,NDUS1_MOUSE,ATPA_MOUSE,HSP7C_MOUSE,ATPD_MOUSE,ATPO_MOUSE	Atp5me,Atp5pd,Ak4,Ndufs1,Atp5f1a,Hspa8,Atp5f1d,Atp5po	4	BP
GO:0006754	ATP biosynthetic process	47180	48	310	5	0.104167	1.61073e-05	4.79298	0.00326495	ALDOA_MOUSE,ATPA_MOUSE,KPYM_MOUSE,F8WHP8_MOUSE,ATPO_MOUSE	Aldoa,Atp5f1a,Pkm,Atp5j2,Atp5po	4	BP
GO:0006734	NADH metabolic process	47180	36	310	3	0.0833333	0.00170828	2.76744	0.0642542	A0A1L1STE6_MOUSE,ODO1_MOUSE,IDHG1_MOUSE	Idh3a,Ogdh,Idh3g	4	BP

## Sheet: CC
GO-CC Term
TermID	Term	bg_pro_num	bg_term_num	fg_pronum	fg_termnum	Ratio	pvalue	Enrichment	FDR	IDs	GeneSymbol	cluster	GoType
GO:0016020	membrane	50309	4993	416	70	0.0140196	8.55896e-06	5.06758	0.000313829	PICK1_MOUSE,F8WIZ7_MOUSE,GBG13_MOUSE,D6RFU9_MOUSE,SIR3_MOUSE,ACSL4_MOUSE,KHDR1_MOUSE,RIT2_MOUSE,AT1B1_MOUSE,RHOA_MOUSE,Q6NZD2_MOUSE,FBX2_MOUSE,SNP25_MOUSE,E9QNT8_MOUSE,GNAS2_MOUSE,GNAO_MOUSE,LRC4C_MOUSE,CN37_MOUSE,VATF_MOUSE,D3Z601_MOUSE,GRM7_MOUSE,GRB2_MOUSE,SNP47_MOUSE,RAB2A_MOUSE,E9Q828_MOUSE,A0A0G2JGX4_MOUSE,HOME1_MOUSE,SBP1_MOUSE,S6A11_MOUSE,A0A286YCI8_MOUSE,KCC2A_MOUSE,A3KGU9_MOUSE,PRAF3_MO…	Pick1,Osbpl6,Gng13,Sypl,Sirt3,Acsl4,Khdrbs1,Rit2,Atp1b1,Rhoa,Snx1,Fbxo2,Snap25,Ank1,Gnas,Gnao1,Lrrc4c,Cnp,Atp6v1f,Clstn3,Grm7,Grb2,Snap47,Rab2a,Atp2b4,Atp1a3,Homer1,Selenbp1,Slc6a11,Sorbs1,Camk2a,Sptan1,Arl6ip5,Vapb,Lin7a,Pak2,Apmap,Capza1,Gnai2,Ndufs8,Dpp10,Ndufaf2,Adcy9,Ank2,Cyrib,Picalm,Pak1,Clint1,Grm5,Rap2b,Atp5f1b,Ncam1,Atp2a2,Dock9,Prkaca,Sorbs2,Slc1a4,Anxa6,Fibp,Plcb1,Ap3s1,Kcnab1,Slc1a2,…	1	CC
GO:0098685	Schaffer collateral - CA1 synapse	50309	456	416	14	0.0307018	3.27764e-05	4.48444	0.0010015	CAD11_MOUSE,LRC4C_MOUSE,GRM1_MOUSE,CANB1_MOUSE,CCG2_MOUSE,KCC2A_MOUSE,TENR_MOUSE,NRX1A_MOUSE,PICAL_MOUSE,GRM5_MOUSE,A0A0A6YY91_MOUSE,SYN1_MOUSE,CSKP_MOUSE,E9QB01_MOUSE	Cdh11,Lrrc4c,Grm1,Ppp3r1,Cacng2,Camk2a,Tnr,Nrxn1,Picalm,Grm5,Ncam1,Syn1,Cask,Ncam1	1	CC
GO:0005747	mitochondrial respiratory chain complex I	50309	115	416	6	0.0521739	0.000406398	3.39105	0.00827848	NDUB1_MOUSE,NDUA8_MOUSE,NDUAA_MOUSE,NDUS8_MOUSE,A0A0R3P9C8_MOUSE,NDUA6_MOUSE	Ndufb1,Ndufa8,Ndufa10,Ndufs8,Ndufa9,Ndufa6	1	CC
GO:0005793	endoplasmic reticulum-Golgi intermediate compartment	50309	269	416	8	0.0297398	0.00193202	2.71399	0.0231002	A0A140LHN0_MOUSE,H3BJG4_MOUSE,NUCB1_MOUSE,TMEDA_MOUSE,E9Q7G1_MOUSE,COPG2_MOUSE,RER1_MOUSE,RAB1B_MOUSE	Yif1b,Trip11,Nucb1,Tmed10,Tmed7,Copg2,Rer1,Rab1b	1	CC
GO:0030134	COPII-coated ER to Golgi transport vesicle	50309	123	416	6	0.0487805	0.000580801	3.23597	0.010648	A0A140LHN0_MOUSE,E9PUQ5_MOUSE,G3X928_MOUSE,TMEDA_MOUSE,E9Q7G1_MOUSE,SC31A_MOUSE	Yif1b,Golga2,Sec23ip,Tmed10,Tmed7,Sec31a	1	CC
GO:0033180	proton-transporting V-type ATPase, V1 domain	50309	32	416	4	0.125	0.000137952	3.86027	0.0031614	VATF_MOUSE,VATC1_MOUSE,VATB2_MOUSE,VATA_MOUSE	Atp6v1f,Atp6v1c1,Atp6v1b2,Atp6v1a	1	CC
GO:0005794	Golgi apparatus	50309	3255	416	44	0.0135177	0.000992064	3.00346	0.0165344	H15_MOUSE,A0A1W2P7A1_MOUSE,A0A140LHN0_MOUSE,PICK1_MOUSE,A1AT2_MOUSE,H3BJG4_MOUSE,XYLK_MOUSE,WDR44_MOUSE,A0A0R4J138_MOUSE,A0A3Q4EI12_MOUSE,NUCB1_MOUSE,Q6NZD2_MOUSE,E9PUQ5_MOUSE,ARF3_MOUSE,A0A0A0MQE8_MOUSE,MAP6_MOUSE,G3X928_MOUSE,GRM7_MOUSE,GRB2_MOUSE,RAB2A_MOUSE,TMEDA_MOUSE,SCYL2_MOUSE,A0A0G2JGX4_MOUSE,VCAM1_MOUSE,NSF_MOUSE,E9Q7G1_MOUSE,H7BWY4_MOUSE,VAPB_MOUSE,ARFG2_MOUSE,Q91XH6_MOUSE,SRC8_MOUSE,P…	H1-5,Rps12,Yif1b,Pick1,Serpina1b,Trip11,Fam20b,Wdr44,Arsb,Rab18,Nucb1,Snx1,Golga2,Arf3,Arhgap21,Map6,Sec23ip,Grm7,Grb2,Rab2a,Tmed10,Scyl2,Atp1a3,Vcam1,Nsf,Tmed7,Dlg1,Vapb,Arfgap2,Vti1b,Cttn,Picalm,Clint1,Atp6v0a1,Rtn3,Mink1,Prkaca,Cpe,Syn1,Uso1,Ganab,Rer1,Rab1b,Col1a1	1	CC
GO:0061831	apical ectoplasmic specialization	50309	8	416	2	0.25	0.00184802	2.73329	0.0226586	AT2A2_MOUSE,ARP3_MOUSE	Atp2a2,Actr3	1	CC
GO:0005801	cis-Golgi network	50309	154	416	6	0.038961	0.00185389	2.73192	0.0226586	H3BJG4_MOUSE,NUCB1_MOUSE,E9PUQ5_MOUSE,MAP6_MOUSE,G3X928_MOUSE,TMEDA_MOUSE	Trip11,Nucb1,Golga2,Map6,Sec23ip,Tmed10	1	CC
GO:0005759	mitochondrial matrix	50309	580	416	19	0.0327586	5.12661e-07	6.29017	2.3497e-05	FDX2_MOUSE,ORN_MOUSE,SIR3_MOUSE,ETHE1_MOUSE,BDH_MOUSE,GLSK_MOUSE,ALDH2_MOUSE,NDUAA_MOUSE,MCCA_MOUSE,GRP75_MOUSE,PNPT1_MOUSE,A0A0R3P9C8_MOUSE,PPIF_MOUSE,KAD3_MOUSE,THIM_MOUSE,DHE3_MOUSE,MDHM_MOUSE,ETFB_MOUSE,A0A0R4J1N9_MOUSE	Fdx2,Rexo2,Sirt3,Ethe1,Bdh1,Gls,Aldh2,Ndufa10,Mccc1,Hspa9,Pnpt1,Ndufa9,Ppif,Ak3,Acaa2,Glud1,Mdh2,Etfb,Tfam	1	CC
GO:0030117	membrane coat	50309	73	416	5	0.0684932	0.000357292	3.44698	0.0075581	AP2A1_MOUSE,AP2A2_MOUSE,AP2B1_MOUSE,AP3S1_MOUSE,CLH1_MOUSE	Ap2a1,Ap2a2,Ap2b1,Ap3s1,Cltc	1	CC
GO:0030658	transport vesicle membrane	50309	93	416	5	0.0537634	0.00108055	2.96636	0.0174794	MAP6_MOUSE,TMEDA_MOUSE,LIN7A_MOUSE,CBPE_MOUSE,G3X9Y1_MOUSE	Map6,Tmed10,Lin7a,Cpe,Syt3	1	CC
GO:0043025	neuronal cell body	50309	2078	416	42	0.0202117	1.19638e-07	6.92213	9.40011e-06	ACSL4_MOUSE,SAC2_MOUSE,PDE1A_MOUSE,E9PUQ5_MOUSE,SNP25_MOUSE,Q80VX2_MOUSE,GNAS2_MOUSE,GRM1_MOUSE,GRM7_MOUSE,SNP47_MOUSE,RAB2A_MOUSE,RACK1_MOUSE,SHRM2_MOUSE,A0A0G2JGX4_MOUSE,HOME1_MOUSE,KCC2A_MOUSE,A0A0G2JGS4_MOUSE,NRX1A_MOUSE,Q91XH6_MOUSE,LIS1_MOUSE,PICAL_MOUSE,ROA2_MOUSE,OGT1_MOUSE,A0A0A6YY91_MOUSE,A0A668KLC6_MOUSE,SRBS2_MOUSE,SATT_MOUSE,CBPE_MOUSE,KCRB_MOUSE,VPS16_MOUSE,KCAB1_MOUSE,HIP1R_MOUSE,E…	Acsl4,Inpp5f,Pde1a,Golga2,Snap25,Cd200,Gnas,Grm1,Grm7,Snap47,Rab2a,Rack1,Shroom2,Atp1a3,Homer1,Camk2a,Camk2d,Nrxn1,Vti1b,Pafah1b1,Picalm,Hnrnpa2b1,Ogt,Ncam1,Map2,Sorbs2,Slc1a4,Cpe,Ckb,Vps16,Kcnab1,Hip1r,Slc12a2,Hsp90ab1,Cnn3,Ass1,Cask,Ncam1,C4b,Chat,Cplx2,Atp5mc1	1	CC
GO:0030425	dendrite	50309	1938	416	40	0.0206398	1.42217e-07	6.84705	9.7774e-06	PICK1_MOUSE,GBG13_MOUSE,A0A0R4J102_MOUSE,EPHB3_MOUSE,SAC2_MOUSE,CALB2_MOUSE,VIAAT_MOUSE,GNAS2_MOUSE,GNAO_MOUSE,GLRX3_MOUSE,MAP6_MOUSE,GRM1_MOUSE,A0A0R4J0W7_MOUSE,NCHL1_MOUSE,D3Z601_MOUSE,GRM7_MOUSE,SNP47_MOUSE,RACK1_MOUSE,UBC9_MOUSE,HOME1_MOUSE,KCC2A_MOUSE,H7BWY4_MOUSE,CP46A_MOUSE,GNAI2_MOUSE,ADCY9_MOUSE,G5E884_MOUSE,A0A668KLC6_MOUSE,MINK1_MOUSE,SRBS2_MOUSE,SATT_MOUSE,CBPE_MOUSE,KCRB_MOUSE,SYN1_M…	Pick1,Gng13,Cpeb3,Ephb3,Inpp5f,Calb2,Slc32a1,Gnas,Gnao1,Glrx3,Map6,Grm1,Lmtk3,Chl1,Clstn3,Grm7,Snap47,Rack1,Ube2i,Homer1,Camk2a,Dlg1,Cyp46a1,Gnai2,Adcy9,Pak1,Map2,Mink1,Sorbs2,Slc1a4,Cpe,Ckb,Syn1,Arhgap44,Mark2,Cnn3,Hnrnpr,Cask,C4b,Cplx2	1	CC
GO:0098839	postsynaptic density membrane	50309	149	416	6	0.0402685	0.00156865	2.80448	0.0210428	GRM1_MOUSE,CCG2_MOUSE,SORC2_MOUSE,H7BWY4_MOUSE,LIN7A_MOUSE,GRM5_MOUSE	Grm1,Cacng2,Sorcs2,Dlg1,Lin7a,Grm5	1	CC
GO:0032991	protein-containing complex	50309	2796	416	44	0.0157368	3.74796e-05	4.42621	0.00103069	PICK1_MOUSE,A0A1Y7VMH7_MOUSE,EXOG_MOUSE,SIR3_MOUSE,KHDR1_MOUSE,TOLIP_MOUSE,Q6NZD2_MOUSE,SGT1_MOUSE,E9PUQ5_MOUSE,RUVB1_MOUSE,GPX4_MOUSE,GNAO_MOUSE,AP2A1_MOUSE,D3Z601_MOUSE,GRM7_MOUSE,HS105_MOUSE,GRB2_MOUSE,E9Q828_MOUSE,Q8K1M3_MOUSE,DCAF7_MOUSE,A3KGU9_MOUSE,A0A0G2JGS4_MOUSE,TBB5_MOUSE,NRX1A_MOUSE,AL1L1_MOUSE,G5E884_MOUSE,PPIA_MOUSE,OGT1_MOUSE,CLUS_MOUSE,A0A668KLC6_MOUSE,AT2A2_MOUSE,KAPCA_MOUSE,ANXA…	Pick1,Kidins220,Exog,Sirt3,Khdrbs1,Tollip,Snx1,Sugt1,Golga2,Ruvbl1,Gpx4,Gnao1,Ap2a1,Clstn3,Grm7,Hsph1,Grb2,Atp2b4,Prkar2a,Dcaf7,Sptan1,Camk2d,Tubb5,Nrxn1,Aldh1l1,Pak1,Ppia,Ogt,Clu,Map2,Atp2a2,Prkaca,Anxa6,Plcb1,Vcp,Uba3,Smad3,Ywhab,Hsp90ab1,Tfam,Cask,Cltc,Rab3a,Erlin2	1	CC
GO:0044297	cell body	50309	354	416	12	0.0338983	4.64368e-05	4.33314	0.0012162	RIT2_MOUSE,Q80VX2_MOUSE,GNAO_MOUSE,RACK1_MOUSE,TBB5_MOUSE,GNAI2_MOUSE,A0A668KLC6_MOUSE,GSTO1_MOUSE,EAA2_MOUSE,TCPH_MOUSE,E9QM38_MOUSE,LZTS1_MOUSE	Rit2,Cd200,Gnao1,Rack1,Tubb5,Gnai2,Map2,Gsto1,Slc1a2,Cct7,Slc12a2,Lzts1	1	CC
GO:0098993	anchored component of synaptic vesicle membrane	50309	40	416	4	0.1	0.000332781	3.47784	0.00732118	RAB2A_MOUSE,A0A286YDR2_MOUSE,SYN1_MOUSE,RAB3A_MOUSE	Rab2a,Rab3c,Syn1,Rab3a	1	CC
GO:0043005	neuron projection	50309	1709	416	44	0.0257461	4.04675e-11	10.3929	5.56428e-09	PICK1_MOUSE,A0A0R4J102_MOUSE,EPHB3_MOUSE,RIT2_MOUSE,SNP25_MOUSE,Q80VX2_MOUSE,CALB2_MOUSE,E9QNT8_MOUSE,VIAAT_MOUSE,GNAO_MOUSE,MAP6_MOUSE,GRM1_MOUSE,A0A2R8W6V9_MOUSE,RACK1_MOUSE,E9Q828_MOUSE,HOME1_MOUSE,S6A11_MOUSE,RPGP2_MOUSE,KCC2A_MOUSE,F6ZYH6_MOUSE,H7BWY4_MOUSE,A0A0G2JGS4_MOUSE,A0A5F8MP75_MOUSE,S4R2R5_MOUSE,LIS1_MOUSE,PICAL_MOUSE,GRM5_MOUSE,ROA2_MOUSE,ROA3_MOUSE,OGT1_MOUSE,NCAM2_MOUSE,A0A0A6YY91…	Pick1,Cpeb3,Ephb3,Rit2,Snap25,Cd200,Calb2,Ank1,Slc32a1,Gnao1,Map6,Grm1,Septin3,Rack1,Atp2b4,Homer1,Slc6a11,Rap1gap2,Camk2a,Gabrb3,Dlg1,Camk2d,Mapk10,Ank2,Pafah1b1,Picalm,Grm5,Hnrnpa2b1,Hnrnpa3,Ogt,Ncam2,Ncam1,Clu,Map2,Nap1l1,Prkaca,Slc1a2,Slc12a2,Gabrg2,Ass1,Camkk2,Ncam1,Chat,Lzts1	1	CC
GO:0042470	melanosome	50309	263	416	13	0.0494297	3.7239e-07	6.429	2.04815e-05	CN37_MOUSE,RAB2A_MOUSE,TMEDA_MOUSE,PDIA3_MOUSE,VPP1_MOUSE,VATB2_MOUSE,NP1L1_MOUSE,SATT_MOUSE,ANXA6_MOUSE,1433B_MOUSE,GANAB_MOUSE,HS90B_MOUSE,CLH1_MOUSE	Cnp,Rab2a,Tmed10,Pdia3,Atp6v0a1,Atp6v1b2,Nap1l1,Slc1a4,Anxa6,Ywhab,Ganab,Hsp90ab1,Cltc	1	CC
GO:0048471	perinuclear region of cytoplasm	50309	2612	416	50	0.0191424	3.74057e-08	7.42706	3.42886e-06	SLIRP_MOUSE,PICK1_MOUSE,WDR44_MOUSE,EHD4_MOUSE,TOLIP_MOUSE,Q6NZD2_MOUSE,E9PUQ5_MOUSE,SNP25_MOUSE,ARF3_MOUSE,PRDX5_MOUSE,GNAS2_MOUSE,MAP6_MOUSE,G3X928_MOUSE,CN37_MOUSE,SNP47_MOUSE,RAB2A_MOUSE,RACK1_MOUSE,D3Z396_MOUSE,Q8K1M3_MOUSE,H7BWY4_MOUSE,A0A0G2JGS4_MOUSE,MYO1B_MOUSE,PAK2_MOUSE,Q8BH40_MOUSE,Q91XH6_MOUSE,S4R2R5_MOUSE,KAPCB_MOUSE,LIS1_MOUSE,SC31A_MOUSE,Q5SUH7_MOUSE,VPP1_MOUSE,CLUS_MOUSE,AT2A2_MO…	Slirp,Pick1,Wdr44,Ehd4,Tollip,Snx1,Golga2,Snap25,Arf3,Prdx5,Gnas,Map6,Sec23ip,Cnp,Snap47,Rab2a,Rack1,Ntm,Prkar2a,Dlg1,Camk2d,Myo1b,Pak2,Stx7,Vti1b,Ank2,Prkacb,Pafah1b1,Sec31a,Clint1,Atp6v0a1,Clu,Atp2a2,Prkaca,Sorbs2,Actr3,Rab3c,Anxa6,Vcp,Mlc1,Uso1,Hip1r,Arhgap1,Ywhab,Prdx6,Serbp1,Hsp90ab1,Cask,Rab1b,Rab3a	1	CC
GO:0042734	presynaptic membrane	50309	333	416	11	0.033033	0.000119789	3.92158	0.00286452	PICK1_MOUSE,SNP25_MOUSE,IGS21_MOUSE,GRM1_MOUSE,A0A2R8W6V9_MOUSE,GRM7_MOUSE,H7BWY4_MOUSE,NRX1A_MOUSE,PICAL_MOUSE,EAA2_MOUSE,CSKP_MOUSE	Pick1,Snap25,Igsf21,Grm1,Septin3,Grm7,Dlg1,Nrxn1,Picalm,Slc1a2,Cask	1	CC
GO:0030122	AP-2 adaptor complex	50309	43	416	4	0.0930233	0.000440687	3.35587	0.00835785	AP2A1_MOUSE,AP2A2_MOUSE,PICAL_MOUSE,AP2B1_MOUSE	Ap2a1,Ap2a2,Picalm,Ap2b1	1	CC
GO:0005905	clathrin-coated pit	50309	266	416	8	0.0300752	0.00180192	2.74426	0.0226586	SAC2_MOUSE,AAK1_MOUSE,ITSN2_MOUSE,SRC8_MOUSE,PICAL_MOUSE,D3Z2E3_MOUSE,HIP1R_MOUSE,CLH1_MOUSE	Inpp5f,Aak1,Itsn2,Cttn,Picalm,Reps1,Hip1r,Cltc	1	CC
GO:0070033	synaptobrevin 2-SNAP-25-syntaxin-1a-complexin II complex	50309	7	416	2	0.285714	0.00139363	2.85585	0.0199893	SNP25_MOUSE,CPLX2_MOUSE	Snap25,Cplx2	1	CC
GO:0005952	cAMP-dependent protein kinase complex	50309	27	416	3	0.111111	0.0014167	2.84872	0.0199893	Q8K1M3_MOUSE,KAPCB_MOUSE,KAPCA_MOUSE	Prkar2a,Prkacb,Prkaca	1	CC
GO:0031982	vesicle	50309	504	416	15	0.0297619	2.47178e-05	4.60699	0.000799695	H15_MOUSE,RHOA_MOUSE,Q6NZD2_MOUSE,RABX5_MOUSE,1433G_MOUSE,MYO1B_MOUSE,NRX1A_MOUSE,Q8BH40_MOUSE,Q91XH6_MOUSE,LIS1_MOUSE,PICAL_MOUSE,VP26A_MOUSE,A0A286YDR2_MOUSE,EAA2_MOUSE,CSKP_MOUSE	H1-5,Rhoa,Snx1,Rabgef1,Ywhag,Myo1b,Nrxn1,Stx7,Vti1b,Pafah1b1,Picalm,Vps26a,Rab3c,Slc1a2,Cask	1	CC
GO:0043229	intracellular organelle	50309	37	416	5	0.135135	1.32298e-05	4.87845	0.000454775	SNP25_MOUSE,VIAAT_MOUSE,VPP1_MOUSE,SYN1_MOUSE,RAB3A_MOUSE	Snap25,Slc32a1,Atp6v0a1,Syn1,Rab3a	1	CC
GO:0060077	inhibitory synapse	50309	96	416	5	0.0520833	0.0012455	2.90466	0.0190285	IGS21_MOUSE,VIAAT_MOUSE,F6ZYH6_MOUSE,NRX1A_MOUSE,GBRG2_MOUSE	Igsf21,Slc32a1,Gabrb3,Nrxn1,Gabrg2	1	CC
GO:0030285	integral component of synaptic vesicle membrane	50309	120	320	6	0.05	0.000125657	3.90081	0.00193197	STX1A_MOUSE,SYPH_MOUSE,STX12_MOUSE,ZNT3_MOUSE,SYT1_MOUSE,SV2A_MOUSE	Stx1a,Syp,Stx12,Slc30a3,Syt1,Sv2a	4	CC
GO:0008021	synaptic vesicle	50309	590	320	17	0.0288136	3.20431e-07	6.49427	1.4332e-05	STX1A_MOUSE,VDAC1_MOUSE,SYPH_MOUSE,ANXA5_MOUSE,RAB5A_MOUSE,PEBP1_MOUSE,A0A0J9YUN4_MOUSE,STX12_MOUSE,ZNT3_MOUSE,G3UX26_MOUSE,HSP7C_MOUSE,SYT1_MOUSE,SV2A_MOUSE,RAB10_MOUSE,J3QMG3_MOUSE,A2A7Z6_MOUSE,MT3_MOUSE	Stx1a,Vdac1,Syp,Anxa5,Rab5a,Pebp1,Dnm1,Stx12,Slc30a3,Vdac2,Hspa8,Syt1,Sv2a,Rab10,Vdac3,Rab3b,Mt3	4	CC
GO:0043679	axon terminus	50309	286	320	8	0.027972	0.000537486	3.26963	0.00601007	B2M1R6_MOUSE,ANXA5_MOUSE,RAB5A_MOUSE,PEBP1_MOUSE,DCE1_MOUSE,SYUB_MOUSE,PACN1_MOUSE,E9Q1G8_MOUSE	Hnrnpk,Anxa5,Rab5a,Pebp1,Gad1,Sncb,Pacsin1,Septin7	4	CC
GO:0031680	G-protein beta/gamma-subunit complex	50309	21	320	3	0.142857	0.000311438	3.50663	0.0039289	GBG7_MOUSE,A0A0N4SW28_MOUSE,GBG3_MOUSE	Gng7,Gng12,Gng3	4	CC
GO:0044327	dendritic spine head	50309	68	320	4	0.0588235	0.000949675	3.02242	0.00881585	G3UXT7_MOUSE,E9QLL2_MOUSE,A0A0J9YUN4_MOUSE,NEUG_MOUSE	Fus,Dnm3,Dnm1,Nrgn	4	CC
GO:0030672	synaptic vesicle membrane	50309	276	320	10	0.0362319	1.27401e-05	4.89483	0.000284914	STX1A_MOUSE,SYPH_MOUSE,E9PUD2_MOUSE,DNM1L_MOUSE,DLG2_MOUSE,ZNT3_MOUSE,SYT1_MOUSE,SV2A_MOUSE,CLCB_MOUSE,SYT5_MOUSE	Stx1a,Syp,Dnm1l,Dnm1l,Dlg2,Slc30a3,Syt1,Sv2a,Cltb,Syt5	4	CC
GO:0031966	mitochondrial membrane	50309	385	320	15	0.038961	3.45948e-08	7.46099	2.12758e-06	OXA1L_MOUSE,E9PXB0_MOUSE,VDAC1_MOUSE,E9PUD2_MOUSE,COF1_MOUSE,E9QLL2_MOUSE,ODO1_MOUSE,DNM1L_MOUSE,UCRI_MOUSE,Q4VA93_MOUSE,SFXN3_MOUSE,A0A0J9YUN4_MOUSE,G3UX26_MOUSE,NEUG_MOUSE,NDUA2_MOUSE	Oxa1l,Pnpla8,Vdac1,Dnm1l,Cfl1,Dnm3,Ogdh,Dnm1l,Uqcrfs1,Prkca,Sfxn3,Dnm1,Vdac2,Nrgn,Ndufa2	4	CC
GO:0032587	ruffle membrane	50309	387	320	9	0.0232558	0.000919044	3.03666	0.00869557	NDKA_MOUSE,PACN2_MOUSE,COF1_MOUSE,PLPP_MOUSE,PTPRZ_MOUSE,EF1A1_MOUSE,EZRI_MOUSE,PACN1_MOUSE,MTMR6_MOUSE	Nme1,Pacsin2,Cfl1,Pdxp,Ptprz1,Eef1a1,Ezr,Pacsin1,Mtmr6	4	CC
GO:0045254	pyruvate dehydrogenase complex	50309	10	320	2	0.2	0.00175479	2.75578	0.0146331	ODP2_MOUSE,ODPA_MOUSE	Dlat,Pdha1	4	CC
GO:0042584	chromaffin granule membrane	50309	20	320	2	0.1	0.00710467	2.14846	0.0387365	ANXA7_MOUSE,SYT1_MOUSE	Anxa7,Syt1	4	CC
GO:0005751	mitochondrial respiratory chain complex IV	50309	19	320	3	0.157895	0.000229054	3.64006	0.00321984	UCRI_MOUSE,COX5A_MOUSE,NDUA4_MOUSE	Uqcrfs1,Cox5a,Ndufa4	4	CC
GO:0005741	mitochondrial outer membrane	50309	447	320	11	0.0246085	0.000158037	3.80124	0.00228689	NDKA_MOUSE,VDAC1_MOUSE,NLRX1_MOUSE,E9PUD2_MOUSE,DNM1L_MOUSE,PEBP1_MOUSE,ACSL6_MOUSE,G3UX26_MOUSE,J3QMG3_MOUSE,ADT1_MOUSE,CYB5B_MOUSE	Nme1,Vdac1,Nlrx1,Dnm1l,Dnm1l,Pebp1,Acsl6,Vdac2,Vdac3,Slc25a4,Cyb5b	4	CC
GO:0005967	mitochondrial pyruvate dehydrogenase complex	50309	6	320	2	0.333333	0.000594865	3.22558	0.0063347	ODP2_MOUSE,ODPA_MOUSE	Dlat,Pdha1	4	CC
GO:0005743	mitochondrial inner membrane	50309	969	320	35	0.0361197	1.86015e-16	15.7305	3.05065e-14	OXA1L_MOUSE,VDAC1_MOUSE,CX6B1_MOUSE,THTM_MOUSE,MIC25_MOUSE,SDHA_MOUSE,MIC13_MOUSE,ATP5E_MOUSE,ATP5H_MOUSE,SFXN1_MOUSE,THIL_MOUSE,UCRI_MOUSE,COX6C_MOUSE,AATM_MOUSE,AT5F1_MOUSE,NDUS1_MOUSE,MIC60_MOUSE,ATPA_MOUSE,G3UX26_MOUSE,COX5A_MOUSE,NDUA4_MOUSE,CH60_MOUSE,M2OM_MOUSE,NIPS1_MOUSE,GHC1_MOUSE,J3QMG3_MOUSE,ADT1_MOUSE,F8WHP8_MOUSE,ATPD_MOUSE,QCR1_MOUSE,AIFM3_MOUSE,CYB5B_MOUSE,TIM9_MOUSE,MIC19_MOUSE,A…	Oxa1l,Vdac1,Cox6b1,Mpst,Chchd6,Sdha,Micos13,Atp5f1e,Atp5pd,Sfxn1,Acat1,Uqcrfs1,Cox6c,Got2,Atp5pb,Ndufs1,Immt,Atp5f1a,Vdac2,Cox5a,Ndufa4,Hspd1,Slc25a11,Nipsnap1,Slc25a22,Vdac3,Slc25a4,Atp5j2,Atp5f1d,Uqcrc1,Aifm3,Cyb5b,Timm9,Chchd3,Fdxr	4	CC
GO:0005834	heterotrimeric G-protein complex	50309	84	320	6	0.0714286	1.69307e-05	4.77133	0.00036217	GBG7_MOUSE,GNAZ_MOUSE,A0A0N4SW28_MOUSE,GNAI1_MOUSE,GBB1_MOUSE,GBG3_MOUSE	Gng7,Gnaz,Gng12,Gnai1,Gnb1,Gng3	4	CC
GO:0098684	photoreceptor ribbon synapse	50309	57	320	4	0.0701754	0.000486564	3.31286	0.00569975	A0A0J9YUN4_MOUSE,HSP7C_MOUSE,A4GZ26_MOUSE,PACN1_MOUSE	Dnm1,Hspa8,Iqsec2,Pacsin1	4	CC
GO:0019773	proteasome core complex, alpha-subunit complex	50309	25	320	3	0.12	0.000528526	3.27693	0.00601007	PSA3_MOUSE,PSA1_MOUSE,PSA5_MOUSE	Psma3,Psma1,Psma5	4	CC
GO:0070044	synaptobrevin 2-SNAP-25-syntaxin-1a complex	50309	10	320	2	0.2	0.00175479	2.75578	0.0146331	STX1A_MOUSE,SNAB_MOUSE	Stx1a,Napb	4	CC
GO:0033269	internode region of axon	50309	27	320	3	0.111111	0.000665853	3.17662	0.00682499	TBB4A_MOUSE,A0A498WGS3_MOUSE,ERMIN_MOUSE	Tubb4a,Mbp,Ermn	4	CC
GO:0062023	collagen-containing extracellular matrix	50309	797	320	13	0.0163112	0.00199019	2.7011	0.0161367	KNG1_MOUSE,Q63ZW6_MOUSE,NID1_MOUSE,FIBG_MOUSE,ANXA7_MOUSE,ANXA5_MOUSE,CALR_MOUSE,TENA_MOUSE,HPLN1_MOUSE,E9QMK2_MOUSE,KPYM_MOUSE,CO1A2_MOUSE,A0A087WS16_MOUSE	Kng1,Col4a5,Nid1,Fgg,Anxa7,Anxa5,Calr,Tnc,Hapln1,Vcan,Pkm,Col1a2,Col6a3	4	CC
GO:0030175	filopodium	50309	275	320	9	0.0327273	7.55817e-05	4.12158	0.00137727	COF1_MOUSE,FSCN1_MOUSE,NHRF1_MOUSE,PTPRZ_MOUSE,A0A571BDG0_MOUSE,RADI_MOUSE,EZRI_MOUSE,B1AZ46_MOUSE,ERMIN_MOUSE	Cfl1,Fscn1,Slc9a3r1,Ptprz1,Srcin1,Rdx,Ezr,Baiap2,Ermn	4	CC
GO:0031906	late endosome lumen	50309	8	320	2	0.25	0.0011011	2.95817	0.0100322	HSP7C_MOUSE,A0A0A0MQF6_MOUSE	Hspa8,Gapdh	4	CC
GO:0070382	exocytic vesicle	50309	91	320	5	0.0549451	0.000300057	3.5228	0.0039289	AKA7G_MOUSE,E9PWE8_MOUSE,SYT1_MOUSE,RAB10_MOUSE,SYT5_MOUSE	Akap7,Dpysl3,Syt1,Rab10,Syt5	4	CC
GO:0005753	mitochondrial proton-transporting ATP synthase complex	50309	19	320	8	0.421053	1.74577e-13	12.758	2.1473e-11	ATP5I_MOUSE,ATP5E_MOUSE,ATP68_MOUSE,ATP5H_MOUSE,AT5F1_MOUSE,ATPA_MOUSE,ATPD_MOUSE,ATPO_MOUSE	Atp5me,Atp5f1e,Atp5mj,Atp5pd,Atp5pb,Atp5f1a,Atp5f1d,Atp5po	4	CC
GO:0000274	mitochondrial proton-transporting ATP synthase, stator stalk	50309	2	320	2	1	4.03328e-05	4.39434	0.000793749	ATP5H_MOUSE,ATPO_MOUSE	Atp5pd,Atp5po	4	CC
GO:0044393	microspike	50309	7	320	2	0.285714	0.000829309	3.08128	0.0081604	FSCN1_MOUSE,EZRI_MOUSE	Fscn1,Ezr	4	CC
GO:0061617	MICOS complex	50309	25	320	5	0.2	4.82976e-07	6.31607	1.9802e-05	MIC25_MOUSE,MIC13_MOUSE,MIC26_MOUSE,MIC60_MOUSE,MIC19_MOUSE	Chchd6,Micos13,Apoo,Immt,Chchd3	4	CC
GO:0001917	photoreceptor inner segment	50309	229	320	7	0.0305677	0.000708435	3.1497	0.00711326	E9QLL2_MOUSE,A0A0J9YUN4_MOUSE,HSP7C_MOUSE,KPYM_MOUSE,GBB1_MOUSE,K3W4Q8_MOUSE,GTR1_MOUSE	Dnm3,Dnm1,Hspa8,Pkm,Gnb1,Bsg,Slc2a1	4	CC
GO:0000159	protein phosphatase type 2A complex	50309	59	320	4	0.0677966	0.000555053	3.25567	0.00606858	2A5E_MOUSE,PP2AB_MOUSE,PP2AA_MOUSE,PTPA_MOUSE	Ppp2r5e,Ppp2cb,Ppp2ca,Ptpa	4	CC
GO:0045261	proton-transporting ATP synthase complex, catalytic core F(1)	50309	14	320	3	0.214286	8.8097e-05	4.05504	0.00154799	ATPA_MOUSE,ATPD_MOUSE,ATPO_MOUSE	Atp5f1a,Atp5f1d,Atp5po	4	CC
GO:0000276	mitochondrial proton-transporting ATP synthase complex, coupling factor F(o)	50309	17	320	4	0.235294	3.58148e-06	5.44594	9.27415e-05	ATP5I_MOUSE,ATP5H_MOUSE,AT5F1_MOUSE,ATPO_MOUSE	Atp5me,Atp5pd,Atp5pb,Atp5po	4	CC
GO:0072534	perineuronal net	50309	21	320	3	0.142857	0.000311438	3.50663	0.0039289	PTPRZ_MOUSE,A0A0R4IZX5_MOUSE,E9QMK2_MOUSE	Ptprz1,Ncan,Vcan	4	CC
GO:0045121	membrane raft	50309	913	320	24	0.026287	6.79491e-09	8.16782	4.77585e-07	VDAC1_MOUSE,KAP3_MOUSE,MAG_MOUSE,NHRF1_MOUSE,RAB5A_MOUSE,Q4VA93_MOUSE,PARK7_MOUSE,ENOA_MOUSE,STX12_MOUSE,EZRI_MOUSE,GNAI1_MOUSE,ATPA_MOUSE,G3UX26_MOUSE,HSP7C_MOUSE,CH60_MOUSE,PP2AA_MOUSE,A2AFG7_MOUSE,K3W4Q8_MOUSE,ADT1_MOUSE,S4R2T7_MOUSE,TBA1A_MOUSE,A0A1L1SUX8_MOUSE,RASK_MOUSE,GTR1_MOUSE	Vdac1,Prkar2b,Mag,Slc9a3r1,Rab5a,Prkca,Park7,Eno1,Stx12,Ezr,Gnai1,Atp5f1a,Vdac2,Hspa8,Hspd1,Ppp2ca,L1cam,Bsg,Slc25a4,Ank2,Tuba1a,Thy1,Kras,Slc2a1	4	CC
GO:0045259	proton-transporting ATP synthase complex	50309	3	320	2	0.666667	0.000120488	3.91905	0.00193197	ATPA_MOUSE,ATPD_MOUSE	Atp5f1a,Atp5f1d	4	CC
GO:0000275	mitochondrial proton-transporting ATP synthase complex, catalytic sector F(1)	50309	5	320	3	0.6	2.52547e-06	5.59766	7.76583e-05	ATP5E_MOUSE,ATPA_MOUSE,ATPD_MOUSE	Atp5f1e,Atp5f1a,Atp5f1d	4	CC
GO:0043209	myelin sheath	50309	514	320	58	0.11284	4.14149e-54	53.3828	2.03761e-51	NDKA_MOUSE,GDIA_MOUSE,VDAC1_MOUSE,A0A0R4J036_MOUSE,STXB1_MOUSE,SDHA_MOUSE,ODP2_MOUSE,ALDOA_MOUSE,TBB4A_MOUSE,GSTM1_MOUSE,MAG_MOUSE,A0A1L1STE6_MOUSE,FSCN1_MOUSE,ATP5H_MOUSE,ACON_MOUSE,UCRI_MOUSE,AATM_MOUSE,AT5F1_MOUSE,A0A498WGS3_MOUSE,RADI_MOUSE,PEBP1_MOUSE,EF1A1_MOUSE,PRDX3_MOUSE,NDUS1_MOUSE,ODPA_MOUSE,TCPG_MOUSE,SNAB_MOUSE,EF1A2_MOUSE,A0A0J9YUN4_MOUSE,ENOA_MOUSE,TAGL3_MOUSE,EZRI_MOUSE,MIC60_MOUS…	Nme1,Gdi1,Vdac1,Nefm,Stxbp1,Sdha,Dlat,Aldoa,Tubb4a,Gstm1,Mag,Idh3a,Fscn1,Atp5pd,Aco2,Uqcrfs1,Got2,Atp5pb,Mbp,Rdx,Pebp1,Eef1a1,Prdx3,Ndufs1,Pdha1,Cct3,Napb,Eef1a2,Dnm1,Eno1,Tagln3,Ezr,Immt,Atp5f1a,Vdac2,Hspa8,Prdx1,Cox5a,Uchl1,Hspd1,Ehd3,Pkm,Gnb1,Ca2,Gpi,Igsf8,Pacsin1,Gapdh,Prdx2,Cct2,Gdi2,Septin7,Slc25a4,Tuba1a,Atp5po,Uqcrc1,Thy1,Ermn	4	CC
GO:0044306	neuron projection terminus	50309	87	320	5	0.0574713	0.000243391	3.6137	0.00332634	SYPH_MOUSE,DCE1_MOUSE,SYT1_MOUSE,UCHL1_MOUSE,B1AZ46_MOUSE	Syp,Gad1,Syt1,Uchl1,Baiap2	4	CC
GO:0033010	paranodal junction	50309	18	1483	4	0.222222	0.00165287	2.78176	0.0249091	JAM3_MOUSE,E9QNF7_MOUSE,SIR2_MOUSE,CNTP1_MOUSE	Jam3,Cntnap2,Sirt2,Cntnap1	3	CC
GO:1904115	axon cytoplasm	50309	239	1483	22	0.0920502	2.89184e-06	5.53883	0.000134232	RAGP1_MOUSE,RANG_MOUSE,S4R1P5_MOUSE,A2ARP8_MOUSE,E9Q6E0_MOUSE,AP3S2_MOUSE,Q6AXB7_MOUSE,ARMX3_MOUSE,D3YXA6_MOUSE,KIF5C_MOUSE,A0A0R4J1F4_MOUSE,DC1I1_MOUSE,RAB21_MOUSE,ARL8B_MOUSE,AP3B2_MOUSE,KIF3A_MOUSE,ARP10_MOUSE,KINH_MOUSE,KIF5A_MOUSE,RB27B_MOUSE,CBPC1_MOUSE,BL1S4_MOUSE	Rangap1,Ranbp1,Dst,Map1a,Mapk8ip3,Ap3s2,Fmr1,Armcx3,Trim46,Kif5c,Madd,Dync1i1,Rab21,Arl8b,Ap3b2,Kif3a,Actr10,Kif5b,Kif5a,Rab27b,Agtpbp1,Bloc1s4	3	CC
GO:0019774	proteasome core complex, beta-subunit complex	50309	20	1483	5	0.25	0.000236815	3.62559	0.00617706	PSB4_MOUSE,PSB7_MOUSE,PSB2_MOUSE,PSB3_MOUSE,PSB6_MOUSE	Psmb4,Psmb7,Psmb2,Psmb3,Psmb6	3	CC
GO:0071007	U2-type catalytic step 2 spliceosome	50309	69	1483	9	0.130435	0.000189634	3.72208	0.00525471	RUXE_MOUSE,RSMB_MOUSE,A0A0B4J1E2_MOUSE,PRP8_MOUSE,PPIL1_MOUSE,RU2A_MOUSE,PLRG1_MOUSE,CDC5L_MOUSE,RBM22_MOUSE	Snrpe,Snrpb,Snw1,Prpf8,Ppil1,Snrpa1,Plrg1,Cdc5l,Rbm22	3	CC
GO:0099061	integral component of postsynaptic density membrane	50309	201	1483	22	0.109453	1.52121e-07	6.81781	1.00517e-05	SLIK3_MOUSE,A2BDQ4_MOUSE,CCG8_MOUSE,ACM4_MOUSE,LRRT4_MOUSE,EFNB3_MOUSE,GRIA2_MOUSE,CSTN1_MOUSE,B0QZW1_MOUSE,DCC_MOUSE,GRIA1_MOUSE,GRID1_MOUSE,A0A0G2JDT9_MOUSE,ACM1_MOUSE,A2AI21_MOUSE,NMDE1_MOUSE,GRIA3_MOUSE,ADCY1_MOUSE,ADA22_MOUSE,SLIK1_MOUSE,LRFN4_MOUSE,GRIA4_MOUSE	Slitrk3,Epha7,Cacng8,Chrm4,Lrrtm4,Efnb3,Gria2,Clstn1,Gria3,Dcc,Gria1,Grid1,Lrrc7,Chrm1,Grin1,Grin2a,Gria3,Adcy1,Adam22,Slitrk1,Lrfn4,Gria4	3	CC
GO:0032281	AMPA glutamate receptor complex	50309	89	1483	12	0.134831	1.20533e-05	4.91889	0.000456923	ABHD6_MOUSE,CCG8_MOUSE,LRRT4_MOUSE,GRIA2_MOUSE,B0QZW1_MOUSE,GRIA1_MOUSE,A0A286YCW7_MOUSE,A2BEE9_MOUSE,CPT1C_MOUSE,Q8R357_MOUSE,GRIA3_MOUSE,GRIA4_MOUSE	Abhd6,Cacng8,Lrrtm4,Gria2,Gria3,Gria1,Nrn1,Dlg3,Cpt1c,Olfm1,Gria3,Gria4	3	CC
GO:0000164	protein phosphatase type 1 complex	50309	29	1483	5	0.172414	0.00145577	2.83691	0.0227365	NCK1_MOUSE,PP1G_MOUSE,SHOC2_MOUSE,PPR3F_MOUSE,PP13G_MOUSE	Nck1,Ppp1cc,Shoc2,Ppp1r3f,Ppp1r3g	3	CC
GO:0002189	ribose phosphate diphosphokinase complex	50309	9	1483	3	0.333333	0.00187929	2.72601	0.0273611	PRPS2_MOUSE,KPRB_MOUSE,KPRA_MOUSE	Prps2,Prpsap2,Prpsap1	3	CC
GO:0099524	postsynaptic cytosol	50309	76	1483	9	0.118421	0.000396763	3.40147	0.00831268	PTEN_MOUSE,Q6AXB7_MOUSE,ALDOC_MOUSE,PLCB3_MOUSE,NEDD4_MOUSE,KPCG_MOUSE,IF4A3_MOUSE,PIN1_MOUSE,G3X9H5_MOUSE	Pten,Fmr1,Aldoc,Plcb3,Nedd4,Prkcg,Eif4a3,Pin1,Htt	3	CC
GO:0043202	lysosomal lumen	50309	32	1483	6	0.1875	0.000304845	3.51592	0.00671441	GLCM_MOUSE,A0A5F8MPS7_MOUSE,EPDR1_MOUSE,NSG1_MOUSE,PLBL2_MOUSE,NEUR1_MOUSE	Gba,Acp2,Epdr1,Nsg1,Plbd2,Neu1	3	CC
GO:0033290	eukaryotic 48S preinitiation complex	50309	26	1483	9	0.346154	3.25898e-08	7.48692	2.79946e-06	EIF3F_MOUSE,EIF3I_MOUSE,EIF3C_MOUSE,EIF3G_MOUSE,EIF3A_MOUSE,EIF3L_MOUSE,EIF3D_MOUSE,EI3JB_MOUSE,EIF3H_MOUSE	Eif3f,Eif3i,Eif3c,Eif3g,Eif3a,Eif3l,Eif3d,Eif3j2,Eif3h	3	CC
GO:0005852	eukaryotic translation initiation factor 3 complex	50309	25	1483	9	0.36	2.18834e-08	7.65989	2.08865e-06	EIF3F_MOUSE,EIF3I_MOUSE,EIF3C_MOUSE,EIF3G_MOUSE,EIF3A_MOUSE,EIF3L_MOUSE,EIF3D_MOUSE,EI3JB_MOUSE,EIF3H_MOUSE	Eif3f,Eif3i,Eif3c,Eif3g,Eif3a,Eif3l,Eif3d,Eif3j2,Eif3h	3	CC
GO:0016282	eukaryotic 43S preinitiation complex	50309	32	1483	10	0.3125	1.71616e-08	7.76544	1.84273e-06	DHX29_MOUSE,EIF3F_MOUSE,EIF3I_MOUSE,EIF3C_MOUSE,EIF3G_MOUSE,EIF3A_MOUSE,EIF3L_MOUSE,EIF3D_MOUSE,EI3JB_MOUSE,EIF3H_MOUSE	Dhx29,Eif3f,Eif3i,Eif3c,Eif3g,Eif3a,Eif3l,Eif3d,Eif3j2,Eif3h	3	CC
GO:0071541	eukaryotic translation initiation factor 3 complex, eIF3m	50309	16	1483	6	0.375	4.03454e-06	5.39421	0.000165032	EIF3F_MOUSE,EIF3I_MOUSE,EIF3C_MOUSE,EIF3A_MOUSE,EIF3D_MOUSE,EIF3H_MOUSE	Eif3f,Eif3i,Eif3c,Eif3a,Eif3d,Eif3h	3	CC
GO:0018444	translation release factor complex	50309	5	1483	3	0.6	0.000244494	3.61173	0.00617706	ERF1_MOUSE,ERF3B_MOUSE,ERF3A_MOUSE	Etf1,Gspt2,Gspt1	3	CC
GO:1990072	TRAPPIII protein complex	50309	6	1483	3	0.5	0.00047823	3.32036	0.00978095	TPC13_MOUSE,A0A286YCX6_MOUSE,TPPC5_MOUSE	Trappc13,Trappc8,Trappc5	3	CC
GO:0030667	secretory granule membrane	50309	78	1483	12	0.153846	2.96905e-06	5.52738	0.000134232	RB27A_MOUSE,MYRIP_MOUSE,ITPR1_MOUSE,EXOC3_MOUSE,PTPR2_MOUSE,D3Z118_MOUSE,VGF_MOUSE,CD38_MOUSE,CAH4_MOUSE,MOES_MOUSE,RB27B_MOUSE,ITPR3_MOUSE	Rab27a,Myrip,Itpr1,Exoc3,Ptprn2,Ica1,Vgf,Cd38,Ca4,Msn,Rab27b,Itpr3	3	CC
GO:0032279	asymmetric synapse	50309	75	1483	11	0.146667	1.22342e-05	4.91242	0.000456923	ACM4_MOUSE,E9Q517_MOUSE,H3BIV5_MOUSE,A0A1C7ZMY3_MOUSE,GRIA2_MOUSE,B0QZW1_MOUSE,BIG2_MOUSE,GRIA1_MOUSE,ACM1_MOUSE,GRIA3_MOUSE,S4A8_MOUSE	Chrm4,Slc6a9,Akap5,Shank2,Gria2,Gria3,Arfgef2,Gria1,Chrm1,Gria3,Slc4a8	3	CC
GO:0030426	growth cone	50309	702	1483	37	0.0527066	0.000578152	3.23796	0.0115496	FGF13_MOUSE,FXR1_MOUSE,E9QAQ5_MOUSE,MYH14_MOUSE,E9Q6E0_MOUSE,A0A1C7ZMY3_MOUSE,H3BKQ7_MOUSE,Q6AXB7_MOUSE,TWF2_MOUSE,COPA_MOUSE,F6TRI8_MOUSE,GRIA2_MOUSE,TBB3_MOUSE,EXOC4_MOUSE,PCLO_MOUSE,ARPC5_MOUSE,Q3TCR7_MOUSE,RUFY3_MOUSE,STMN3_MOUSE,EXOC3_MOUSE,NGEF_MOUSE,Q3U9D6_MOUSE,E9PW07_MOUSE,ENOG_MOUSE,NRP1_MOUSE,SIR2_MOUSE,A2BEE9_MOUSE,B2RUG9_MOUSE,RPGF4_MOUSE,A2AI21_MOUSE,A0A2I3BPP1_MOUSE,RGRF1_MOUSE,CAT…	Fgf13,Fxr1,Gsk3b,Myh14,Mapk8ip3,Shank2,Ppp1r9a,Fmr1,Twf2,Copa,Fez1,Gria2,Tubb3,Exoc4,Pclo,Arpc5,Dnm2,Rufy3,Stmn3,Exoc3,Ngef,Exoc6,Cbarp,Eno2,Nrp1,Sirt2,Dlg3,Apc,Rapgef4,Grin1,Tsc2,Rasgrf1,Ctsz,Arhgef7,Cbl,Atcay,Cyth2	3	CC
GO:0099523	presynaptic cytosol	50309	99	1483	10	0.10101	0.000696286	3.15721	0.0126269	PP2BC_MOUSE,Q6AXB7_MOUSE,KPCE_MOUSE,D3Z079_MOUSE,KPCB_MOUSE,KPCG_MOUSE,MRP_MOUSE,CTBP2_MOUSE,G3X9H5_MOUSE,TRIM9_MOUSE	Ppp3cc,Fmr1,Prkce,Stxbp5,Prkcb,Prkcg,Marcksl1,Ctbp2,Htt,Trim9	3	CC
GO:0005739	mitochondrion	50309	4571	1483	264	0.0577554	1.07738e-26	25.9676	9.25472e-24	A0A0R4J1J1_MOUSE,ODBB_MOUSE,PYRD_MOUSE,ABHD6_MOUSE,AKAP8_MOUSE,P5CR2_MOUSE,CRYAB_MOUSE,PSB4_MOUSE,RM37_MOUSE,MYG1_MOUSE,Q6P8N8_MOUSE,NDUF5_MOUSE,MTX2_MOUSE,COQ6_MOUSE,PP1G_MOUSE,TTC19_MOUSE,PLCE_MOUSE,A0A1Y7VM56_MOUSE,S2546_MOUSE,NOCT_MOUSE,MSRA_MOUSE,AASS_MOUSE,MIA40_MOUSE,HEBP1_MOUSE,A0A0G2JDM2_MOUSE,GOLP3_MOUSE,PAPD1_MOUSE,S27A1_MOUSE,LYRM7_MOUSE,EFGM_MOUSE,STK11_MOUSE,ABCB7_MOUSE,RT11_MOUSE,Y…	Pnkd,Bckdhb,Dhodh,Abhd6,Akap8,Pycr2,Cryab,Psmb4,Mrpl37,Myg1,Clpx,Ndufaf5,Mtx2,Coq6,Ppp1cc,Ttc19,Agpat5,Sirt5,Slc25a46,Noct,Msra,Aass,Chchd4,Hebp1,Abhd4,Golph3,Mtpap,Slc27a1,Lyrm7,Gfm1,Stk11,Abcb7,Mrps11,Ykt6,Ddah2,Oxnad1,Nol3,Ndufs3,Apex1,Bckdha,Txnrd1,Ccm2,Gatc,Ppm1e,Gsk3b,Slc25a1,Gclc,Suclg1,Dhx29,Coq3,Ctps2,Xpnpep3,Mecr,Acadl,Spr,Mt-Cyb,Supv3l1,Gpd1,Tufm,Fahd1,Dhx36,Hsdl2,Nfs1,Ssbp1,Nr3c1,Gcdh…	3	CC
GO:0005790	smooth endoplasmic reticulum	50309	106	1483	11	0.103774	0.000303045	3.51849	0.00671441	E9Q6E0_MOUSE,Q6AXB7_MOUSE,MYO1D_MOUSE,CALX_MOUSE,G3UZJ2_MOUSE,A0A1B0GT12_MOUSE,RYR2_MOUSE,HYOU1_MOUSE,Q3TML0_MOUSE,D3Z1Y1_MOUSE,JPH4_MOUSE	Mapk8ip3,Fmr1,Myo1d,Canx,Map2,Kcnn2,Ryr2,Hyou1,Pdia6,Syvn1,Jph4	3	CC
GO:0005856	cytoskeleton	50309	1632	578	45	0.0275735	8.41191e-08	7.07511	9.92605e-06	A0A6I8MWZ7_MOUSE,NS1BP_MOUSE,RHOF_MOUSE,A0A140LIW3_MOUSE,E9PUK3_MOUSE,GA2L1_MOUSE,KAZRN_MOUSE,RHOB_MOUSE,SGIP1_MOUSE,A0A2C9F2A2_MOUSE,TMOD2_MOUSE,F8WID5_MOUSE,GEPH_MOUSE,F6U6X3_MOUSE,ABI2_MOUSE,A0A5F8MP96_MOUSE,DREB_MOUSE,F8WGF2_MOUSE,D3Z2H9_MOUSE,Q3UHT7_MOUSE,RHOG_MOUSE,A0A3Q4EGR2_MOUSE,LPPRC_MOUSE,A0A338P769_MOUSE,MK03_MOUSE,ADDB_MOUSE,HSBP1_MOUSE,SEPT9_MOUSE,E9QAX2_MOUSE,A0A0A0MQE5_MOUSE,ABI1_…	Trim9,Ivns1abp,Rhof,Frmpd3,Fnbp1l,Gas2l1,Kazn,Rhob,Sgip1,Rin1,Tmod2,Tpm1,Gphn,Dyrk1a,Abi2,Septin4,Dbn1,Nos1,Tpm3-rs7,Erc2,Rhog,Rock1,Lrpprc,Septin5,Mapk3,Add2,Hsbp1,Septin9,Myo18a,Camsap1,Abi1,Stk39,Epb41l1,Tenm1,Tmsb4x,Plec,Dclk2,Dpysl2,Coro1c,Vim,Mark1,Pitpnm2,Amph,Slc30a9,Tpm3	6	CC
GO:0031095	platelet dense tubular network membrane	50309	4	578	2	0.5	0.00077861	3.10868	0.0185108	EHD1_MOUSE,DEMA_MOUSE	Ehd1,Dmtn	6	CC
GO:0031315	extrinsic component of mitochondrial outer membrane	50309	17	578	3	0.176471	0.000909851	3.04103	0.0185108	SCP2_MOUSE,PHB_MOUSE,SARM1_MOUSE	Scp2,Phb,Sarm1	6	CC
GO:0031253	cell projection membrane	50309	60	578	5	0.0833333	0.000638421	3.19489	0.0182328	ENTP2_MOUSE,RAB35_MOUSE,AT1B2_MOUSE,DEMA_MOUSE,A0A0R4J0Z3_MOUSE	Entpd2,Rab35,Atp1b2,Dmtn,Aqp4	6	CC
GO:0030061	mitochondrial crista	50309	35	578	4	0.114286	0.000680613	3.1671	0.0182528	ADX_MOUSE,AKAP1_MOUSE,OPA1_MOUSE,PHB_MOUSE	Fdx1,Akap1,Opa1,Phb	6	CC
GO:0031597	cytosolic proteasome complex	50309	15	578	3	0.2	0.000619295	3.2081	0.0182328	PRS8_MOUSE,PRS10_MOUSE,IDE_MOUSE	Psmc5,Psmc6,Ide	6	CC
GO:0033588	elongator holoenzyme complex	50309	17	578	3	0.176471	0.000909851	3.04103	0.0185108	ELP6_MOUSE,A0A286YDB8_MOUSE,ELP1_MOUSE	Elp6,Elp3,Elp1	6	CC
GO:0022624	proteasome accessory complex	50309	55	578	6	0.109091	4.02999e-05	4.3947	0.00237769	PRS8_MOUSE,PRS10_MOUSE,PSMD8_MOUSE,PSMD6_MOUSE,PSMD5_MOUSE,PSD13_MOUSE	Psmc5,Psmc6,Psmd8,Psmd6,Psmd5,Psmd13	6	CC
GO:0005838	proteasome regulatory particle	50309	37	578	4	0.108108	0.000843084	3.07413	0.0185108	PRS8_MOUSE,PSMD8_MOUSE,PSMD6_MOUSE,PSD13_MOUSE	Psmc5,Psmd8,Psmd6,Psmd13	6	CC
GO:0005737	cytoplasm	50309	17141	578	268	0.015635	5.43538e-10	9.26477	1.06896e-07	CDC42_MOUSE,NUDC2_MOUSE,A0A0G2JG40_MOUSE,RWDD1_MOUSE,MK_MOUSE,A0A6I8MWZ7_MOUSE,PMM1_MOUSE,IPO13_MOUSE,D3Z6D2_MOUSE,FKB1A_MOUSE,CAB45_MOUSE,PURA2_MOUSE,G3BP1_MOUSE,AGO1_MOUSE,F6THK7_MOUSE,KAP1_MOUSE,A0A3B2WC92_MOUSE,NDEL1_MOUSE,E9Q794_MOUSE,MSI2H_MOUSE,PYRG1_MOUSE,SMAP2_MOUSE,G3UYG6_MOUSE,NDUC2_MOUSE,RGS14_MOUSE,BAG1_MOUSE,A0A0A6YW53_MOUSE,WDR41_MOUSE,E9PUK3_MOUSE,GA2L1_MOUSE,K1C18_MOUSE,MYLK_MOUS…	Cdc42,Nudcd2,Gna12,Rwdd1,Mdk,Trim9,Pmm1,Ipo13,Stau2,Fkbp1a,Sdf4,Adss2,G3bp1,Ago1,Irak1,Prkar1b,Spast,Ndel1,Mta3,Msi2,Ctps1,Smap2,Gigyf2,Ndufc2,Rgs14,Bag1,Map4k4,Wdr41,Fnbp1l,Gas2l1,Krt18,Mylk,Aspa,Bcas3,Psap,Armc8,Scp2,Rps6,Cygb,S100a13,Stx1b,Fhl1,Vamp2,Rab7a,Tpt1,Agk,Arf4,Acot11,Tars1,Hnrnpa1,Cdk5rap3,Dcun1d1,Arhgap17,Txnrd2,Gnpda1,Acot7,Sgip1,Arl1,Pdcd4,Kcnma1,Ckap5,Crkl,Rab3gap1,Mtpn,Camlg,Psa…	6	CC
GO:0000502	proteasome complex	50309	140	578	9	0.0642857	3.78808e-05	4.42158	0.00237769	PSA6_MOUSE,PRS8_MOUSE,PSB5_MOUSE,PSA2_MOUSE,PRS10_MOUSE,PSMD8_MOUSE,PSMD6_MOUSE,PSB1_MOUSE,PSD13_MOUSE	Psma6,Psmc5,Psmb5,Psma2,Psmc6,Psmd8,Psmd6,Psmb1,Psmd13	6	CC
GO:0005874	microtubule	50309	1080	578	25	0.0231481	0.000873191	3.05889	0.0185108	D3Z6D2_MOUSE,A0A3B2WC92_MOUSE,NDEL1_MOUSE,RGS14_MOUSE,A0A1B0GRA5_MOUSE,CK5P3_MOUSE,Q5UE59_MOUSE,MLP3A_MOUSE,D3YXZ3_MOUSE,G3UW47_MOUSE,H7BX08_MOUSE,STMN1_MOUSE,LPPRC_MOUSE,TCPZ_MOUSE,D3YYK8_MOUSE,E9PZ43_MOUSE,GSK3A_MOUSE,SEPT9_MOUSE,A0A0A0MQE5_MOUSE,MARE3_MOUSE,F7BQW7_MOUSE,TCPQ_MOUSE,A0A0A0MQC7_MOUSE,TBB2B_MOUSE,SARM1_MOUSE	Stau2,Spast,Ndel1,Rgs14,Stim1,Cdk5rap3,Klc1,Map1lc3a,Klc2,Kif1a,Camsap2,Stmn1,Lrpprc,Cct6a,Mapre2,Map4,Gsk3a,Septin9,Camsap1,Mapre3,Synj1,Cct8,Mapt,Tubb2b,Sarm1	6	CC
GO:0005839	proteasome core complex	50309	45	578	4	0.0888889	0.00176924	2.75221	0.0316319	PSA6_MOUSE,PSB5_MOUSE,PSA2_MOUSE,PSB1_MOUSE	Psma6,Psmb5,Psma2,Psmb1	6	CC
GO:1990904	ribonucleoprotein complex	50309	572	606	18	0.0314685	0.000245424	3.61008	0.0072643	AGO2_MOUSE,HNRH2_MOUSE,G3UZ34_MOUSE,HNRPM_MOUSE,A2ATP6_MOUSE,SRA1_MOUSE,CELF1_MOUSE,TIA1_MOUSE,HNRPU_MOUSE,NPM_MOUSE,RLA0_MOUSE,ILF2_MOUSE,E9QNN1_MOUSE,PA2G4_MOUSE,RS3A_MOUSE,NUP98_MOUSE,DAZP1_MOUSE,A0A0G2JDX3_MOUSE	Ago2,Hnrnph2,Eftud2,Hnrnpm,Myef2,Sra1,Celf1,Tia1,Hnrnpu,Npm1,Rplp0,Ilf2,Dhx9,Pa2g4,Rps3a,Nup98,Dazap1,Celf3	5	CC
GO:0055038	recycling endosome membrane	50309	215	606	9	0.0418605	0.00128798	2.89009	0.024017	RFIP2_MOUSE,RAB8A_MOUSE,TFR1_MOUSE,A2AEW8_MOUSE,RB11B_MOUSE,Q7TNB5_MOUSE,S4R2D2_MOUSE,A0A087WPG3_MOUSE,EHD2_MOUSE	Rab11fip2,Rab8a,Tfrc,Gripap1,Rab11b,Gria1,Gga3,Abhd17a,Ehd2	5	CC
GO:0005686	U2 snRNP	50309	36	606	5	0.138889	6.90585e-05	4.16078	0.00312736	D3YW09_MOUSE,SF3A1_MOUSE,PHF5A_MOUSE,SMD2_MOUSE,G5E866_MOUSE	Sf3a2,Sf3a1,Phf5a,Snrpd2,Sf3b1	5	CC
GO:0015935	small ribosomal subunit	50309	57	606	6	0.105263	6.42149e-05	4.19236	0.00312736	RS20_MOUSE,RS16_MOUSE,NPM_MOUSE,RSSA_MOUSE,RS3A_MOUSE,RS18_MOUSE	Rps20,Rps16,Npm1,Rpsa,Rps3a,Rps18	5	CC
GO:0031234	extrinsic component of cytoplasmic side of plasma membrane	50309	257	606	10	0.0389105	0.00122847	2.91064	0.0236015	A0A1Y7VJP1_MOUSE,G3UX72_MOUSE,FERM2_MOUSE,ESYT2_MOUSE,KCAB2_MOUSE,OSBL2_MOUSE,DLG4_MOUSE,FAK2_MOUSE,EPN1_MOUSE,E9Q5M1_MOUSE	Ryr2,Mcf2l,Fermt2,Esyt2,Kcnab2,Osbpl2,Dlg4,Ptk2b,Epn1,Tnk2	5	CC
GO:0005868	cytoplasmic dynein complex	50309	55	606	5	0.0909091	0.000528058	3.27732	0.0133916	Q7M739_MOUSE,DCTN4_MOUSE,E9Q3M3_MOUSE,DYL1_MOUSE,DYHC1_MOUSE	Tpr,Dctn4,Dctn1,Dynll1,Dync1h1	5	CC
GO:0005635	nuclear envelope	50309	603	606	23	0.0381426	1.64932e-06	5.7827	0.000209134	F6TKU5_MOUSE,NU214_MOUSE,LMNB1_MOUSE,ABCF1_MOUSE,A0A1Y7VJP1_MOUSE,RTN4_MOUSE,CHM2A_MOUSE,MD1L1_MOUSE,BIN1_MOUSE,Q7M739_MOUSE,CHMP7_MOUSE,RAN_MOUSE,A0A1D5RLV7_MOUSE,V9GX17_MOUSE,RBP2_MOUSE,MTOR_MOUSE,E9Q3M3_MOUSE,DYHC1_MOUSE,D3Z2Z1_MOUSE,NUP98_MOUSE,A0A0R4J1I6_MOUSE,ANX11_MOUSE,ACES_MOUSE	Nsmf,Nup214,Lmnb1,Abcf1,Ryr2,Rtn4,Chmp2a,Mad1l1,Bin1,Tpr,Chmp7,Ran,Wdfy3,Mlip,Ranbp2,Mtor,Dctn1,Dync1h1,Clip1,Nup98,Nup210,Anxa11,Ache	5	CC
GO:0005762	mitochondrial large ribosomal subunit	50309	127	606	8	0.0629921	0.000161795	3.79103	0.00539886	RM11_MOUSE,RM44_MOUSE,RM40_MOUSE,RM55_MOUSE,RM49_MOUSE,RM01_MOUSE,ICT1_MOUSE,RM18_MOUSE	Mrpl11,Mrpl44,Mrpl40,Mrpl55,Mrpl49,Mrpl1,Mrpl58,Mrpl18	5	CC
GO:0005643	nuclear pore	50309	144	606	8	0.0555556	0.000380246	3.41994	0.0104816	NU214_MOUSE,Q7M739_MOUSE,RAN_MOUSE,RBP2_MOUSE,E9PUW7_MOUSE,A0A0A0MQM0_MOUSE,NUP98_MOUSE,A0A0R4J1I6_MOUSE	Nup214,Tpr,Ran,Ranbp2,Xpo7,Eif5a,Nup98,Nup210	5	CC
GO:0031209	SCAR complex	50309	42	606	5	0.119048	0.000146831	3.83318	0.00517172	CYFP1_MOUSE,SRA1_MOUSE,NCKP1_MOUSE,A0A571BF78_MOUSE,CYFP2_MOUSE	Cyfip1,Sra1,Nckap1,Wasf3,Cyfip2	5	CC
GO:0044615	nuclear pore nuclear basket	50309	42	606	4	0.0952381	0.00162335	2.78959	0.0278163	MD1L1_MOUSE,Q7M739_MOUSE,RBP2_MOUSE,NUP98_MOUSE	Mad1l1,Tpr,Ranbp2,Nup98	5	CC
GO:0071005	U2-type precatalytic spliceosome	50309	109	606	12	0.110092	9.08443e-09	8.0417	1.43988e-06	D3YW09_MOUSE,G3UZ34_MOUSE,SRRM2_MOUSE,SF3A1_MOUSE,PHF5A_MOUSE,PRP4_MOUSE,SMD2_MOUSE,LSM2_MOUSE,SF3B3_MOUSE,PR38A_MOUSE,NH2L1_MOUSE,G5E866_MOUSE	Sf3a2,Eftud2,Srrm2,Sf3a1,Phf5a,Prpf4,Snrpd2,Lsm2,Sf3b3,Prpf38a,Snu13,Sf3b1	5	CC
GO:0071011	precatalytic spliceosome	50309	34	606	5	0.147059	5.19935e-05	4.28405	0.00274699	PHF5A_MOUSE,SMD2_MOUSE,LSM2_MOUSE,PR38A_MOUSE,NH2L1_MOUSE	Phf5a,Snrpd2,Lsm2,Prpf38a,Snu13	5	CC
GO:0000776	kinetochore	50309	251	606	10	0.0398406	0.00102916	2.98752	0.0217496	F7DCH5_MOUSE,MD1L1_MOUSE,Q7M739_MOUSE,A0A140LHA2_MOUSE,PSN1_MOUSE,DCTN4_MOUSE,E9Q3M3_MOUSE,DYL1_MOUSE,HNRPU_MOUSE,NUP98_MOUSE	Clasp2,Mad1l1,Tpr,Bub3,Psen1,Dctn4,Dctn1,Dynll1,Hnrnpu,Nup98	5	CC
GO:0005851	eukaryotic translation initiation factor 2B complex	50309	22	606	4	0.181818	0.000128327	3.89168	0.00478582	EI2BA_MOUSE,B1AUN2_MOUSE,IF2A_MOUSE,EI2BE_MOUSE	Eif2b1,Eif2b3,Eif2s1,Eif2b5	5	CC
GO:0101031	chaperone complex	50309	38	606	4	0.105263	0.00111194	2.95392	0.022741	BAG2_MOUSE,SDF2L_MOUSE,TSC1_MOUSE,DJB11_MOUSE	Bag2,Sdf2l1,Tsc1,Dnajb11	5	CC
GO:0098794	postsynapse	50309	572	778	27	0.0472028	4.25235e-07	6.37137	2.77563e-05	X3CL1_MOUSE,WASF1_MOUSE,SYT11_MOUSE,MECP2_MOUSE,VGLU1_MOUSE,HPCA_MOUSE,R7BP_MOUSE,RL8_MOUSE,SNP23_MOUSE,SEP11_MOUSE,CAPR1_MOUSE,ATAD1_MOUSE,CDK5_MOUSE,Q3TLP8_MOUSE,SYUA_MOUSE,GIPC1_MOUSE,GBRA1_MOUSE,AINX_MOUSE,Q8BGR3_MOUSE,IF4B_MOUSE,NAC2_MOUSE,PTN_MOUSE,ELAV1_MOUSE,NCDN_MOUSE,NCS1_MOUSE,Q3UHH0_MOUSE,A0A0R4J0X8_MOUSE	Cx3cl1,Wasf1,Syt11,Mecp2,Slc17a7,Hpca,Rgs7bp,Rpl8,Snap23,Septin11,Caprin1,Atad1,Cdk5,Rac1,Snca,Gipc1,Gabra1,Ina,Camk4,Eif4b,Slc8a2,Ptn,Elavl1,Ncdn,Ncs1,Atp2b2,Arhgef7	2	CC
GO:0043204	perikaryon	50309	644	778	24	0.0372671	8.56055e-05	4.0675	0.00279385	A0A087WS40_MOUSE,ARPC2_MOUSE,PDPK1_MOUSE,SYT11_MOUSE,HSPB1_MOUSE,RELN_MOUSE,HPCA_MOUSE,NUCB2_MOUSE,R7BP_MOUSE,GLNA_MOUSE,MP2K4_MOUSE,Q6P1J1_MOUSE,NEUM_MOUSE,A0A140LHI4_MOUSE,KCC2B_MOUSE,KCRU_MOUSE,CDK5_MOUSE,MK09_MOUSE,E0CYV0_MOUSE,KCND2_MOUSE,MK01_MOUSE,A2ATS6_MOUSE,NFH_MOUSE,NCDN_MOUSE	Cacna1c,Arpc2,Pdpk1,Syt11,Hspb1,Reln,Hpca,Nucb2,Rgs7bp,Glul,Map2k4,Crmp1,Gap43,Kcnc3,Camk2b,Ckmt1,Cdk5,Mapk9,Pcmt1,Kcnd2,Mapk1,Rtn4rl2,Nefh,Ncdn	2	CC
GO:0045335	phagocytic vesicle	50309	218	778	12	0.0550459	0.000168445	3.77354	0.00403145	E9PVP4_MOUSE,A0A0N4SW73_MOUSE,SYT11_MOUSE,RAP1A_MOUSE,BECN1_MOUSE,BORG4_MOUSE,STX8_MOUSE,Q9D4I9_MOUSE,RAB8B_MOUSE,Q8K4W8_MOUSE,UVRAG_MOUSE,MYO1C_MOUSE	Evl,Rab11fip5,Syt11,Rap1a,Becn1,Cdc42ep4,Stx8,Rab23,Rab8b,Clcn3,Uvrag,Myo1c	2	CC
GO:0030027	lamellipodium	50309	748	778	26	0.0347594	0.00013524	3.8689	0.00346793	E9PVP4_MOUSE,ALS2_MOUSE,ARPC2_MOUSE,A0A338P7B7_MOUSE,WASF1_MOUSE,CADH2_MOUSE,UNC5C_MOUSE,CAPZB_MOUSE,ACTS_MOUSE,NEB2_MOUSE,FLOT2_MOUSE,E0CXB9_MOUSE,CAPR1_MOUSE,CDK5_MOUSE,DMD_MOUSE,COR1B_MOUSE,J3QNM3_MOUSE,Q3UH59_MOUSE,Q3TLP8_MOUSE,ACTB_MOUSE,MRCKB_MOUSE,PHAR4_MOUSE,STMN2_MOUSE,BRK1_MOUSE,ARPC3_MOUSE,A0A0R4J0X8_MOUSE	Evl,Als2,Arpc2,Dynlt1a,Wasf1,Cdh2,Unc5c,Capzb,Acta1,Ppp1r9b,Flot2,Ctnna2,Caprin1,Cdk5,Dmd,Coro1b,Enah,Myh10,Rac1,Actb,Cdc42bpb,Phactr4,Stmn2,Brk1,Arpc3,Arhgef7	2	CC
GO:0005883	neurofilament	50309	27	778	4	0.148148	0.00075041	3.1247	0.0134699	DMD_MOUSE,AINX_MOUSE,PCP4_MOUSE,NFH_MOUSE	Dmd,Ina,Pcp4,Nefh	2	CC
GO:0022625	cytosolic large ribosomal subunit	50309	145	778	17	0.117241	1.29768e-10	9.88683	2.32933e-08	RL29_MOUSE,RL8_MOUSE,RL3_MOUSE,RL13A_MOUSE,Q9CQM8_MOUSE,RL9_MOUSE,RL32_MOUSE,RL11_MOUSE,RL13_MOUSE,RLA2_MOUSE,RL14_MOUSE,A0A3B2WDD2_MOUSE,RL26_MOUSE,RL23A_MOUSE,RL19_MOUSE,RL34_MOUSE,RL35_MOUSE	Rpl29,Rpl8,Rpl3,Rpl13a,Rpl21,Rpl9,Rpl32,Rpl11,Rpl13,Rplp2,Rpl14,Rpl10a,Rpl26,Rpl23a,Rpl19,Rpl34,Rpl35	2	CC
GO:0005769	early endosome	50309	948	778	36	0.0379747	1.05558e-06	5.97651	5.83004e-05	SNX17_MOUSE,SPE39_MOUSE,ALS2_MOUSE,SNX16_MOUSE,WASC5_MOUSE,A0A0N4SW73_MOUSE,HGS_MOUSE,HA11_MOUSE,RAP1A_MOUSE,G8JL54_MOUSE,A1L3P4_MOUSE,STX8_MOUSE,VA0D1_MOUSE,NICA_MOUSE,LMTK2_MOUSE,RABE1_MOUSE,Q3UDC3_MOUSE,AKT2_MOUSE,MK01_MOUSE,RABE2_MOUSE,A0A0R4J0A6_MOUSE,CHMP3_MOUSE,CHM1A_MOUSE,ANFY1_MOUSE,Q8K4W8_MOUSE,TGFA1_MOUSE,SORT_MOUSE,UVRAG_MOUSE,TRIO_MOUSE,Q8C288_MOUSE,VPS41_MOUSE,WASH1_MOUSE,D3YVM8_MOU…	Snx17,Vipas39,Als2,Snx16,Washc5,Rab11fip5,Hgs,H2-D1,Rap1a,Commd1,Slc9a6,Stx8,Atp6v0d1,Ncstn,Lmtk2,Rabep1,Tom1,Akt2,Mapk1,Rabep2,Slc17a6,Chmp3,Chmp1a,Ankfy1,Clcn3,Tgfbrap1,Sort1,Uvrag,Trio,Atp9a,Vps41,Washc1,Bloc1s1,Fkbp15,Gja1,Vps18	2	CC
GO:0005903	brush border	50309	280	778	12	0.0428571	0.00154089	2.81223	0.0251445	B7ZCT1_MOUSE,ML12B_MOUSE,EPS8_MOUSE,A0A2R8VHF9_MOUSE,SNX5_MOUSE,CAPZB_MOUSE,VINC_MOUSE,A2AC16_MOUSE,Q3UH59_MOUSE,GIPC1_MOUSE,A0A1W2P6F6_MOUSE,MYO1C_MOUSE	Rgs19,Myl12b,Eps8,Myh11,Snx5,Capzb,Vcl,Dcxr,Myh10,Gipc1,Myl6,Myo1c	2	CC
GO:0097526	spliceosomal tri-snRNP complex	50309	14	778	3	0.214286	0.00118072	2.92785	0.0206771	LSM4_MOUSE,LSM7_MOUSE,SMD3_MOUSE	Lsm4,Lsm7,Snrpd3	2	CC
GO:0005577	fibrinogen complex	50309	21	778	4	0.190476	0.000275443	3.55997	0.00599297	A2AP_MOUSE,FIBA_MOUSE,FIBB_MOUSE,A0A087WS56_MOUSE	Serpinf2,Fga,Fgb,Fn1	2	CC
GO:0005749	mitochondrial respiratory chain complex II, succinate dehydrogenase complex (ubiquinone)	50309	7	778	3	0.428571	0.000123099	3.90975	0.00338031	DHSD_MOUSE,F8WGB3_MOUSE,SDHB_MOUSE	Sdhd,Sdhc,Sdhb	2	CC
GO:0072562	blood microparticle	50309	11	778	3	0.272727	0.000554073	3.25643	0.0106816	FIBA_MOUSE,FIBB_MOUSE,HPT_MOUSE	Fga,Fgb,Hp	2	CC
GO:0005768	endosome	50309	1028	778	38	0.036965	1.01514e-06	5.99347	5.83004e-05	SNX17_MOUSE,EGFR_MOUSE,ARPC2_MOUSE,BIRC6_MOUSE,WASC5_MOUSE,PACN3_MOUSE,A0A0N4SW73_MOUSE,HGS_MOUSE,J3QNU6_MOUSE,G8JL54_MOUSE,A1L3P4_MOUSE,ADCY5_MOUSE,Q6P1B9_MOUSE,BECN1_MOUSE,MPRD_MOUSE,STX8_MOUSE,AT1A1_MOUSE,SNX5_MOUSE,S1PR1_MOUSE,OCAD1_MOUSE,UBXN6_MOUSE,FLOT2_MOUSE,VPS4B_MOUSE,RABE1_MOUSE,Q3UDC3_MOUSE,FYN_MOUSE,RAB8B_MOUSE,ARSA_MOUSE,STMN2_MOUSE,ANFY1_MOUSE,Q8K4W8_MOUSE,UVRAG_MOUSE,Q8C288_MOUSE,…	Snx17,Egfr,Arpc2,Birc6,Washc5,Pacsin3,Rab11fip5,Hgs,Arrb1,Commd1,Slc9a6,Adcy5,Bin1,Becn1,M6pr,Stx8,Atp1a1,Snx5,S1pr1,Ociad1,Ubxn6,Flot2,Vps4b,Rabep1,Tom1,Fyn,Rab8b,Arsa,Stmn2,Ankfy1,Clcn3,Uvrag,Atp9a,Washc1,Fkbp15,Gja1,Vps18,Clvs1	2	CC
GO:0005885	Arp2/3 protein complex	50309	31	778	4	0.129032	0.00128118	2.89239	0.021902	ARPC2_MOUSE,ARPC4_MOUSE,ARC1A_MOUSE,ARPC3_MOUSE	Arpc2,Arpc4,Arpc1a,Arpc3	2	CC
GO:0030424	axon	50309	1685	778	57	0.0338279	4.27743e-08	7.36882	4.58351e-06	MTMRD_MOUSE,G5E8B6_MOUSE,A0A0G2JDE3_MOUSE,ALS2_MOUSE,AAPK2_MOUSE,Q62347_MOUSE,SYT11_MOUSE,HEM3_MOUSE,HSPB1_MOUSE,UNC5C_MOUSE,E9PUP9_MOUSE,EPHB2_MOUSE,Q6P1B9_MOUSE,RELN_MOUSE,HPCA_MOUSE,S4R2K9_MOUSE,KTNB1_MOUSE,R7BP_MOUSE,BSN_MOUSE,SYUG_MOUSE,MP2K4_MOUSE,E9PW06_MOUSE,NEUM_MOUSE,B1AQZ0_MOUSE,IF4G2_MOUSE,A0A140LHI4_MOUSE,E0CXB9_MOUSE,SEP11_MOUSE,E9QMU3_MOUSE,NRP2_MOUSE,PYGB_MOUSE,CDK5_MOUSE,1433E_MO…	Sbf2,Kirrel3,Adgrl2,Als2,Prkaa2,Creb1,Syt11,Hmbs,Hspb1,Unc5c,Epha5,Ephb2,Bin1,Reln,Hpca,Ank3,Katnb1,Rgs7bp,Bsn,Sncg,Map2k4,Nfasc,Gap43,Septin8,Eif4g2,Kcnc3,Ctnna2,Septin11,Map7,Nrp2,Pygb,Cdk5,Ywhae,Dmd,Myh10,Kif3c,Snca,Actb,Ppfia2,Mapk1,Gad2,Pcp4,Rtn4rl2,Palm,Atp6ap2,Slc8a2,Hepacam,Nefh,Scn2a,Map4,Ncs1,Anxa3,Lrrtm1,Atg7,Tnfrsf21,Fkbp15,Mtmr2	2	CC
GO:0098978	glutamatergic synapse	50309	1953	1483	125	0.0640041	5.78905e-16	15.2374	1.6576e-13	HIP1_MOUSE,ABHD6_MOUSE,PP2BC_MOUSE,A2BDQ4_MOUSE,CCG8_MOUSE,AB17C_MOUSE,ACTBL_MOUSE,D6RIL1_MOUSE,STX4_MOUSE,PP1G_MOUSE,FXR1_MOUSE,B2RQ57_MOUSE,D9HP81_MOUSE,V9GX87_MOUSE,A0A494B901_MOUSE,ACM4_MOUSE,LRRT4_MOUSE,E9QK34_MOUSE,E9Q967_MOUSE,YES_MOUSE,PGCA_MOUSE,A0A5F8MPY3_MOUSE,A0A571BET0_MOUSE,SPRL1_MOUSE,E9QAQ5_MOUSE,ABLM3_MOUSE,CHM2B_MOUSE,H3BIV5_MOUSE,SI1L1_MOUSE,GCYA1_MOUSE,E9PYV1_MOUSE,SYN3_MOUSE,…	Hip1,Abhd6,Ppp3cc,Epha7,Cacng8,Abhd17c,Actbl2,Nr3c2,Stx4,Ppp1cc,Fxr1,Abl2,Rims2,Stau1,Rela,Chrm4,Lrrtm4,Nlgn1,Dvl3,Yes1,Acan,Ptk2,Cacna1a,Sparcl1,Gsk3b,Ablim3,Chmp2b,Akap5,Sipa1l1,Gucy1a1,Nr3c1,Syn3,Shank2,Grip1,Ppp1r9a,Gabbr2,Fmr1,Ntrk3,Cttnbp2,Chmp4b,Kalrn,Efnb3,Canx,Gria2,Clstn1,Nptx1,Tanc2,Myo6,Prkce,Cspg5,Pclo,Gria3,Dnm2,Usp8,Tnik,Wasl,Gria1,Abr,Actn2,Grid1,Tanc1,Nos1ap,Ngef,Cacna2d1,Git1,Cd…	3	CC
GO:0098793	presynapse	50309	578	1483	40	0.0692042	7.78173e-07	6.10892	4.77465e-05	HIP1_MOUSE,PP2BC_MOUSE,E9PXP7_MOUSE,PP1G_MOUSE,FXR1_MOUSE,E9QK34_MOUSE,SGTA_MOUSE,DOC2B_MOUSE,B1AS67_MOUSE,RAB2B_MOUSE,SYT12_MOUSE,CACB2_MOUSE,AUXI_MOUSE,Q6AXB7_MOUSE,KALRN_MOUSE,GRN_MOUSE,ITPR1_MOUSE,Q3TCR7_MOUSE,B2RQ80_MOUSE,CAPON_MOUSE,D3Z079_MOUSE,SC6A4_MOUSE,GNB5_MOUSE,SNAA_MOUSE,Q9QWX2_MOUSE,ROGDI_MOUSE,RAB6A_MOUSE,FLOT1_MOUSE,A0A0R4J0B8_MOUSE,UN13A_MOUSE,SH3G1_MOUSE,DGKQ_MOUSE,CACB4_MOUSE,…	Hip1,Ppp3cc,Ston2,Ppp1cc,Fxr1,Nlgn1,Sgta,Doc2b,Plekhg5,Rab2b,Syt12,Cacnb2,Dnajc6,Fmr1,Kalrn,Grn,Itpr1,Dnm2,Tnik,Nos1ap,Stxbp5,Slc6a4,Gnb5,Napa,Bcl2l1,Rogdi,Rab6a,Flot1,Sh3gl3,Unc13a,Sh3gl1,Dgkq,Cacnb4,Slc4a8,Begain,Vps35,Rpl22,Atcay,Lin7b,Itpr3	3	CC
GO:0014069	postsynaptic density	50309	1460	1483	86	0.0589041	1.42523e-09	8.84612	1.74896e-07	CCG8_MOUSE,CRYAB_MOUSE,AB17C_MOUSE,Q8CE04_MOUSE,FXR1_MOUSE,ACM4_MOUSE,E9QK34_MOUSE,DBNL_MOUSE,E9Q517_MOUSE,S4R1P5_MOUSE,PCBP2_MOUSE,MAP4_MOUSE,E9QAQ5_MOUSE,SH2D5_MOUSE,CHM2B_MOUSE,RL38_MOUSE,PJA2_MOUSE,H3BIV5_MOUSE,A2ARP8_MOUSE,SI1L1_MOUSE,E9PYV1_MOUSE,AUXI_MOUSE,SYN3_MOUSE,A0A1C7ZMY3_MOUSE,H7BX09_MOUSE,H3BKQ7_MOUSE,Q6AXB7_MOUSE,RL7_MOUSE,CHM4B_MOUSE,KALRN_MOUSE,GRIA2_MOUSE,CSTN1_MOUSE,EIF3A_MOUS…	Cacng8,Cryab,Abhd17c,Cast,Fxr1,Chrm4,Nlgn1,Dbnl,Slc6a9,Dst,Pcbp2,Map4,Gsk3b,Sh2d5,Chmp2b,Rpl38,Pja2,Akap5,Map1a,Sipa1l1,Nr3c1,Dnajc6,Syn3,Shank2,Grip1,Ppp1r9a,Fmr1,Rpl7,Chmp4b,Kalrn,Gria2,Clstn1,Eif3a,Myo6,Strn,Exoc4,Inpp4a,Pclo,Gria3,Itpr1,Mpdz,Dnm2,Usp8,Map2,Gria1,Pde4b,Sos1,Prnp,Ablim1,Shisa7,Dlg3,Lrrc7,Dgkz,Arfgap1,Prkcg,Epb41,Snx27,Dclk1,Cald1,Chrm1,Magi2,Rapgef4,Rpl23,Dnm1,Phb2,Slc8a1,Grin1…	3	CC
GO:0045202	synapse	50309	1998	1483	109	0.0545546	7.02981e-10	9.15306	1.2963e-07	CRYAB_MOUSE,ACTBL_MOUSE,STX4_MOUSE,1433T_MOUSE,D9HP81_MOUSE,WASF2_MOUSE,A0A494B901_MOUSE,ACM4_MOUSE,E9QK34_MOUSE,E9Q967_MOUSE,SEM4B_MOUSE,RS7_MOUSE,SPRL1_MOUSE,QKI_MOUSE,ABLM3_MOUSE,DEN1A_MOUSE,RL38_MOUSE,PTPRN_MOUSE,A0A0U1RNQ6_MOUSE,A2ARP8_MOUSE,AUXI_MOUSE,SYN3_MOUSE,SNG3_MOUSE,RP3A_MOUSE,H3BKQ7_MOUSE,Q6AXB7_MOUSE,RL7_MOUSE,EMB_MOUSE,MYRIP_MOUSE,GRIA2_MOUSE,Q8K356_MOUSE,E9Q175_MOUSE,S12A5_MOUSE,…	Cryab,Actbl2,Stx4,Ywhaq,Rims2,Wasf2,Rela,Chrm4,Nlgn1,Dvl3,Sema4b,Rps7,Sparcl1,Qki,Ablim3,Dennd1a,Rpl38,Ptprn,Tufm,Map1a,Dnajc6,Syn3,Syngr3,Rph3a,Ppp1r9a,Fmr1,Rpl7,Emb,Myrip,Gria2,Ly6h,Myo6,Slc12a5,Cspg5,Exoc4,Pclo,Ttyh1,Cadm2,Map1s,Gria1,Madd,Snta1,Slc6a4,Gabra5,Git1,Cdkl5,Gpc1,Rpl10,Rab21,Dlg3,Lrrc7,Arfgap1,Psmc4,Olfm1,Arl8b,Ppp3cb,Mapk8,Grk2,Eef1d,Rps2,Chrm1,Rpl31,Magi2,Rapgef2,Insr,Itsn1,Vgf,U…	3	CC
GO:0005783	endoplasmic reticulum	50309	3191	1483	123	0.0385459	0.00151434	2.81978	0.0232289	NCEH1_MOUSE,SARAF_MOUSE,SEC62_MOUSE,CHP1_MOUSE,ALG1_MOUSE,Q8CE04_MOUSE,NCK1_MOUSE,TPPC1_MOUSE,V9GX87_MOUSE,S27A1_MOUSE,CLD10_MOUSE,TSN_MOUSE,YKT6_MOUSE,LNP_MOUSE,GLCM_MOUSE,PGRC2_MOUSE,STIM2_MOUSE,APEX1_MOUSE,ECM29_MOUSE,SDF2_MOUSE,SEZ6_MOUSE,A0A1L1SSF2_MOUSE,VAC14_MOUSE,SRP54_MOUSE,FAF2_MOUSE,TXD12_MOUSE,CERS2_MOUSE,NB5R3_MOUSE,AR6P1_MOUSE,COPD_MOUSE,E9Q7B0_MOUSE,AMRP_MOUSE,Z4YJW0_MOUSE,S39A7_MO…	Nceh1,Saraf,Sec62,Chp1,Alg1,Cast,Nck1,Trappc1,Stau1,Slc27a1,Cldn10,Tsn,Ykt6,Lnpk,Gba,Pgrmc2,Stim2,Apex1,Ecpas,Sdf2,Sez6,Adpgk,Vac14,Srp54,Faf2,Txndc12,Cers2,Cyb5r3,Arl6ip1,Arcn1,P4ha1,Lrpap1,Emc1,Slc39a7,Grn,Canx,Rdh14,Gria2,Bcap31,Lrrc8c,Sez6l2,Mesd,Prkce,Agpat1,Alb,Ei24,Gabarapl1,Capn2,Atl2,Itpr1,Sec13,Gria1,Acsl5,Lars1,Ryr2,Prnp,Sec63,Rpl10,Erlec1,Ktn1,Jph3,Aco1,Bcl2l1,Tex2,Cpt1c,Pde2a,Fkbp8,K…	3	CC
GO:0098982	GABA-ergic synapse	50309	385	1483	26	0.0675325	9.31558e-05	4.03079	0.00285789	ABHD6_MOUSE,SLIK3_MOUSE,D6RIL1_MOUSE,D9HP81_MOUSE,PGCA_MOUSE,GCYA1_MOUSE,GABR2_MOUSE,D3YWB9_MOUSE,CSTN1_MOUSE,CSPG5_MOUSE,PCLO_MOUSE,A0A087WPQ9_MOUSE,ITPR1_MOUSE,GBRA5_MOUSE,GIT1_MOUSE,A0A498WGM0_MOUSE,A0A0G2JEG6_MOUSE,FLOT1_MOUSE,PHB2_MOUSE,CTBP2_MOUSE,ARHG7_MOUSE,Q3USX9_MOUSE,SLIK1_MOUSE,RIMS1_MOUSE,NRX3A_MOUSE,LRFN4_MOUSE	Abhd6,Slitrk3,Nr3c2,Rims2,Acan,Gucy1a1,Gabbr2,Cntnap4,Clstn1,Cspg5,Pclo,Nrxn3,Itpr1,Gabra5,Git1,Syt7,Magi2,Flot1,Phb2,Ctbp2,Arhgef7,Gabra4,Slitrk1,Rims1,Nrxn3,Lrfn4	3	CC
GO:0099055	integral component of postsynaptic membrane	50309	257	1483	20	0.077821	8.86761e-05	4.05219	0.00282121	ABHD6_MOUSE,SLIK3_MOUSE,E9Q517_MOUSE,GABR2_MOUSE,NTRK3_MOUSE,CALX_MOUSE,GRIA2_MOUSE,CSPG5_MOUSE,B0QZW1_MOUSE,GRIA1_MOUSE,GRM2_MOUSE,SC6A4_MOUSE,GBRA5_MOUSE,NRP1_MOUSE,ACM1_MOUSE,G5E8Y0_MOUSE,EPHA4_MOUSE,GRIA3_MOUSE,AGRB1_MOUSE,DGLA_MOUSE	Abhd6,Slitrk3,Slc6a9,Gabbr2,Ntrk3,Canx,Gria2,Cspg5,Gria3,Gria1,Grm2,Slc6a4,Gabra5,Nrp1,Chrm1,Slc8a1,Epha4,Gria3,Adgrb1,Dagla	3	CC
GO:0005758	mitochondrial intermembrane space	50309	235	1483	18	0.0765957	0.000237311	3.62468	0.00617706	A0A1Y7VM56_MOUSE,MIA40_MOUSE,GOLP3_MOUSE,CCS_MOUSE,A0A0U1RP81_MOUSE,CAN2_MOUSE,FBXL4_MOUSE,COA7_MOUSE,E9Q800_MOUSE,GLYM_MOUSE,KAD2_MOUSE,SUOX_MOUSE,CLPB_MOUSE,TIM29_MOUSE,TIM13_MOUSE,HEM6_MOUSE,AR2BP_MOUSE,TRIA1_MOUSE	Sirt5,Chchd4,Golph3,Ccs,Immt,Capn2,Fbxl4,Coa7,Immt,Shmt2,Ak2,Suox,Clpb,Timm29,Timm13,Cpox,Arl2bp,Triap1	3	CC
GO:0030136	clathrin-coated vesicle	50309	256	416	8	0.03125	0.00141742	2.8485	0.0199893	AAK1_MOUSE,AP2A1_MOUSE,SCYL2_MOUSE,PICAL_MOUSE,Q5SUH7_MOUSE,VPS16_MOUSE,HIP1R_MOUSE,CLH1_MOUSE	Aak1,Ap2a1,Scyl2,Picalm,Clint1,Vps16,Hip1r,Cltc	1	CC
GO:0005829	cytosol	50309	11783	1483	519	0.0440465	1.12469e-24	23.949	4.83055e-22	HOOK1_MOUSE,RAGP1_MOUSE,PYRD_MOUSE,A2A6M1_MOUSE,A2AWI7_MOUSE,A2A517_MOUSE,RUXE_MOUSE,RLBP1_MOUSE,CRYAB_MOUSE,CHP1_MOUSE,E9PXP7_MOUSE,A0A1W2P7U1_MOUSE,A0A1Y7VMA0_MOUSE,BTBD1_MOUSE,Q8CE04_MOUSE,PPAC_MOUSE,PSB4_MOUSE,CASP3_MOUSE,PYM1_MOUSE,NCK1_MOUSE,Q6P8N8_MOUSE,ARMD3_MOUSE,DCUP_MOUSE,ZWINT_MOUSE,FGF13_MOUSE,CCDC6_MOUSE,Q3UHC1_MOUSE,H3BJY2_MOUSE,1433T_MOUSE,FXR1_MOUSE,E9PVU7_MOUSE,RANG_MOUSE,A0A1Y7…	Hook1,Rangap1,Dhodh,Snf8,Sh3glb2,Cyth1,Snrpe,Rlbp1,Cryab,Chp1,Ston2,Cdc34,Nqo2,Btbd1,Cast,Acp1,Psmb4,Casp3,Pym1,Nck1,Clpx,Armh3,Urod,Zwint,Fgf13,Ccdc6,Rapgef1,Asap1,Ywhaq,Fxr1,Pde4d,Ranbp1,Sirt5,Msra,Hebp1,Cndp2,Stau1,Xpo4,Golph3,Tbk1,Sars,Cad,Pip4k2a,Lrrc49,Rela,Raph1,Acin1,Ttbk1,Ubqln2,Rab3ip,Stk11,Copb1,Washc2,Sgta,Dvl3,Dbnl,Ykt6,Ppm1b,Chm,Xpo5,Ikbkb,Snrpb,Gstm4,Gna13,Ppp1r12a,Gpcpd1,Yes1,Ptk2…	3	CC
GO:0031901	early endosome membrane	50309	412	1483	26	0.0631068	0.000271055	3.56694	0.00630332	RAB5C_MOUSE,RAB5B_MOUSE,WASC2_MOUSE,VP33B_MOUSE,GGA1_MOUSE,D3YUL8_MOUSE,SNX6_MOUSE,GRIA1_MOUSE,Q78ZM0_MOUSE,DP13A_MOUSE,L2GL1_MOUSE,SNX27_MOUSE,RCC2_MOUSE,A0A0R4J0B8_MOUSE,EPHA4_MOUSE,NSG1_MOUSE,SH3G1_MOUSE,SNX4_MOUSE,MON2_MOUSE,SORL_MOUSE,EPHB1_MOUSE,DGLA_MOUSE,RAB4A_MOUSE,S4R1X1_MOUSE,CLVS2_MOUSE,D3Z5N5_MOUSE	Rab5c,Rab5b,Washc2,Vps33b,Gga1,Inpp4a,Snx6,Gria1,Snx3,Appl1,Llgl1,Snx27,Rcc2,Sh3gl3,Epha4,Nsg1,Sh3gl1,Snx4,Mon2,Sorl1,Ephb1,Dagla,Rab4a,Wdr91,Clvs2,Pikfyve	3	CC
GO:0071013	catalytic step 2 spliceosome	50309	226	1483	18	0.079646	0.00014638	3.83452	0.00419135	RSMB_MOUSE,TFP11_MOUSE,U520_MOUSE,H7BX95_MOUSE,PRP6_MOUSE,SF3B6_MOUSE,A0A0B4J1E2_MOUSE,PRP8_MOUSE,Q8C2Q7_MOUSE,PPIL1_MOUSE,RU2A_MOUSE,SNUT1_MOUSE,IF4A3_MOUSE,A0A0G2JFX7_MOUSE,PLRG1_MOUSE,CDC5L_MOUSE,MTREX_MOUSE,RBM22_MOUSE	Snrpb,Tfip11,Snrnp200,Srsf1,Prpf6,Sf3b6,Snw1,Prpf8,Hnrnph1,Ppil1,Snrpa1,Sart1,Eif4a3,Rbm8a,Plrg1,Cdc5l,Mtrex,Rbm22	3	CC
GO:0043198	dendritic shaft	50309	286	1483	19	0.0664336	0.000937414	3.02807	0.015789	E9QK34_MOUSE,E9QAQ5_MOUSE,SEZ6_MOUSE,H3BIV5_MOUSE,A2ARP8_MOUSE,GRIA2_MOUSE,S12A5_MOUSE,EXOC4_MOUSE,B0QZW1_MOUSE,G3UZJ2_MOUSE,GRIA1_MOUSE,A2BEE9_MOUSE,ARBK1_MOUSE,A2A484_MOUSE,G5E8Y0_MOUSE,EPHA4_MOUSE,GRIA3_MOUSE,H3BJU7_MOUSE,JPH4_MOUSE	Nlgn1,Gsk3b,Sez6,Akap5,Map1a,Gria2,Slc12a5,Exoc4,Gria3,Map2,Gria1,Dlg3,Grk2,Zmynd8,Slc8a1,Epha4,Gria3,Arhgef2,Jph4	3	CC
GO:0042788	polysomal ribosome	50309	71	778	8	0.112676	1.42296e-05	4.84681	0.000681125	NUFP2_MOUSE,LAR4B_MOUSE,RL29_MOUSE,RL8_MOUSE,RL11_MOUSE,RS23_MOUSE,A0A3B2WDD2_MOUSE,RL19_MOUSE	Nufip2,Larp4b,Rpl29,Rpl8,Rpl11,Rps23,Rpl10a,Rpl19	2	CC
GO:0005840	ribosome	50309	256	778	20	0.078125	4.47048e-09	8.34965	6.41961e-07	PTCD3_MOUSE,RM13_MOUSE,RM28_MOUSE,RL29_MOUSE,RS27L_MOUSE,RS3_MOUSE,RL3_MOUSE,RL13A_MOUSE,DMD_MOUSE,Q9CQM8_MOUSE,SYUA_MOUSE,RL9_MOUSE,RL11_MOUSE,RL14_MOUSE,RS23_MOUSE,RS10_MOUSE,Q91V55_MOUSE,RL34_MOUSE,RT09_MOUSE,A0A1L1SQA8_MOUSE	Ptcd3,Mrpl13,Mrpl28,Rpl29,Rps27l,Rps3,Rpl3,Rpl13a,Dmd,Rpl21,Snca,Rpl9,Rpl11,Rpl14,Rps23,Rps10,Rps5,Rpl34,Mrps9,Rps25	2	CC
GO:0032591	dendritic spine membrane	50309	44	778	5	0.113636	0.000575746	3.23977	0.0106816	NEB2_MOUSE,A0A140LHI4_MOUSE,PALM_MOUSE,RENR_MOUSE,SHSA6_MOUSE	Ppp1r9b,Kcnc3,Palm,Atp6ap2,Shisa6	2	CC
GO:0022627	cytosolic small ribosomal subunit	50309	116	778	10	0.0862069	1.38117e-05	4.85975	0.000681125	RS9_MOUSE,RS27L_MOUSE,RS3_MOUSE,ISG15_MOUSE,RS8_MOUSE,RS23_MOUSE,G3X9Q6_MOUSE,RS10_MOUSE,Q91V55_MOUSE,A0A1L1SQA8_MOUSE	Rps9,Rps27l,Rps3,Isg15,Rps8,Rps23,Larp4,Rps10,Rps5,Rps25	2	CC
GO:0046540	U4/U6 x U5 tri-snRNP complex	50309	66	1483	8	0.121212	0.000705576	3.15146	0.0126269	RUXE_MOUSE,RSMB_MOUSE,U520_MOUSE,PRP6_MOUSE,PRP8_MOUSE,LSM8_MOUSE,SNUT1_MOUSE,PPIH_MOUSE	Snrpe,Snrpb,Snrnp200,Prpf6,Prpf8,Lsm8,Sart1,Ppih	3	CC

## Sheet: MF
GO-MF Term
TermID	Term	bg_pro_num	bg_term_num	fg_pronum	fg_termnum	Ratio	pvalue	Enrichment	FDR	IDs	GeneSymbol	cluster	GoType
GO:0034604	pyruvate dehydrogenase (NAD+) activity	44344	7	301	2	0.285714	0.000942919	3.02553	0.0257794	ODP2_MOUSE,ODPA_MOUSE	Dlat,Pdha1	4	MF
GO:0005525	GTP binding	44344	953	301	24	0.0251836	4.94542e-08	7.3058	1.01216e-05	NDKA_MOUSE,RHBT2_MOUSE,E9PUD2_MOUSE,TBB4A_MOUSE,GNAZ_MOUSE,E9QLL2_MOUSE,Q5SW88_MOUSE,RAB14_MOUSE,DNM1L_MOUSE,RAB5A_MOUSE,KAD4_MOUSE,Q99JZ4_MOUSE,EF1A1_MOUSE,EF1A2_MOUSE,A0A0J9YUN4_MOUSE,RRAGA_MOUSE,GNAI1_MOUSE,EHD3_MOUSE,RAB10_MOUSE,A2A7Z6_MOUSE,E9Q1G8_MOUSE,TBA1A_MOUSE,RASK_MOUSE,H12_MOUSE	Nme1,Rhobtb2,Dnm1l,Tubb4a,Gnaz,Dnm3,Rab1a,Rab14,Dnm1l,Rab5a,Ak4,Sar1a,Eef1a1,Eef1a2,Dnm1,Rraga,Gnai1,Ehd3,Rab10,Rab3b,Septin7,Tuba1a,Kras,H1-2	4	MF
GO:0003924	GTPase activity	44344	742	301	22	0.0296496	1.06208e-08	7.97384	3.2606e-06	RHBT2_MOUSE,E9PUD2_MOUSE,TBB4A_MOUSE,GNAZ_MOUSE,E9QLL2_MOUSE,Q5SW88_MOUSE,RAB14_MOUSE,DNM1L_MOUSE,RAB5A_MOUSE,Q99JZ4_MOUSE,EF1A1_MOUSE,EF1A2_MOUSE,A0A0J9YUN4_MOUSE,RRAGA_MOUSE,GNAI1_MOUSE,GBB1_MOUSE,RAB10_MOUSE,A2A7Z6_MOUSE,E9Q1G8_MOUSE,TBA1A_MOUSE,GBG3_MOUSE,RASK_MOUSE	Rhobtb2,Dnm1l,Tubb4a,Gnaz,Dnm3,Rab1a,Rab14,Dnm1l,Rab5a,Sar1a,Eef1a1,Eef1a2,Dnm1,Rraga,Gnai1,Gnb1,Rab10,Rab3b,Septin7,Tuba1a,Gng3,Kras	4	MF
GO:0003729	mRNA binding	44344	829	301	16	0.0193004	0.000202601	3.69336	0.0113088	RBM15_MOUSE,F7BGR7_MOUSE,A0A0G2JFY5_MOUSE,B2M1R6_MOUSE,CALR_MOUSE,PABP1_MOUSE,V9GX43_MOUSE,G5E924_MOUSE,EF1A1_MOUSE,F8WJG3_MOUSE,PARK7_MOUSE,CELF4_MOUSE,RL5_MOUSE,KPYM_MOUSE,RU1C_MOUSE,CNBP_MOUSE	Rbm15,Gm21992,Fubp1,Hnrnpk,Calr,Pabpc1,Celf2,Hnrnpl,Eef1a1,Tra2b,Park7,Celf4,Rpl5,Pkm,Snrpc,Cnbp	4	MF
GO:0016209	antioxidant activity	44344	51	301	4	0.0784314	0.0004045	3.39308	0.0155227	PRDX4_MOUSE,PRDX1_MOUSE,APOE_MOUSE,PRDX2_MOUSE	Prdx4,Prdx1,Apoe,Prdx2	4	MF
GO:0051021	GDP-dissociation inhibitor binding	44344	4	301	2	0.5	0.000273065	3.56373	0.0128971	RAB5A_MOUSE,RAB10_MOUSE	Rab5a,Rab10	4	MF
GO:0004601	peroxidase activity	44344	59	301	3	0.0508475	0.00760499	2.1189	0.0881031	PRDX4_MOUSE,PRDX1_MOUSE,PRDX2_MOUSE	Prdx4,Prdx1,Prdx2	4	MF
GO:0031821	G protein-coupled serotonin receptor binding	44344	8	301	2	0.25	0.00125159	2.90254	0.0295568	GNAZ_MOUSE,GNAI1_MOUSE	Gnaz,Gnai1	4	MF
GO:0046933	proton-transporting ATP synthase activity, rotational mechanism	44344	32	301	7	0.21875	1.8021e-09	8.74422	1.10649e-06	ATP5I_MOUSE,ATP5E_MOUSE,ATP5H_MOUSE,AT5F1_MOUSE,ATPA_MOUSE,ATPD_MOUSE,ATPO_MOUSE	Atp5me,Atp5f1e,Atp5pd,Atp5pb,Atp5f1a,Atp5f1d,Atp5po	4	MF
GO:0008379	thioredoxin peroxidase activity	44344	15	301	3	0.2	0.000132619	3.87739	0.0093566	PRDX3_MOUSE,PRDX1_MOUSE,PRDX2_MOUSE	Prdx3,Prdx1,Prdx2	4	MF
GO:0009055	electron transfer activity	44344	74	301	4	0.0540541	0.00164848	2.78292	0.0361489	SDHA_MOUSE,NDUS1_MOUSE,NCPR_MOUSE,CYB5B_MOUSE	Sdha,Ndufs1,Por,Cyb5b	4	MF
GO:0015288	porin activity	44344	16	301	3	0.1875	0.000162404	3.7894	0.00997162	VDAC1_MOUSE,G3UX26_MOUSE,J3QMG3_MOUSE	Vdac1,Vdac2,Vdac3	4	MF
GO:0004449	isocitrate dehydrogenase (NAD+) activity	44344	8	301	2	0.25	0.00125159	2.90254	0.0295568	A0A1L1STE6_MOUSE,IDHG1_MOUSE	Idh3a,Idh3g	4	MF
GO:0044325	ion channel binding	44344	557	301	13	0.0233393	0.000130641	3.88392	0.0093566	CRBN_MOUSE,KCNB1_MOUSE,STX1A_MOUSE,VDAC1_MOUSE,E9PWP6_MOUSE,AP2M1_MOUSE,NPTN_MOUSE,1433Z_MOUSE,FGF12_MOUSE,CTNB1_MOUSE,PP2AA_MOUSE,A0A1L1SV25_MOUSE,S4R2T7_MOUSE	Crbn,Kcnb1,Stx1a,Vdac1,Rims1,Ap2m1,Nptn,Ywhaz,Fgf12,Ctnnb1,Ppp2ca,Actn4,Ank2	4	MF
GO:0005540	hyaluronic acid binding	44344	59	301	4	0.0677966	0.000706021	3.15118	0.0216748	A0A0R4IZX5_MOUSE,HPLN1_MOUSE,E9QMK2_MOUSE,HPLN4_MOUSE	Ncan,Hapln1,Vcan,Hapln4	4	MF
GO:0008308	voltage-gated anion channel activity	44344	14	301	3	0.214286	0.000106631	3.97212	0.0093566	VDAC1_MOUSE,G3UX26_MOUSE,J3QMG3_MOUSE	Vdac1,Vdac2,Vdac3	4	MF
GO:0051433	BH2 domain binding	44344	3	301	2	0.666667	0.000137149	3.86281	0.0093566	E9PUD2_MOUSE,DNM1L_MOUSE	Dnm1l,Dnm1l	4	MF
GO:0022889	serine transmembrane transporter activity	44344	8	301	2	0.25	0.00125159	2.90254	0.0295568	SFXN1_MOUSE,SFXN3_MOUSE	Sfxn1,Sfxn3	4	MF
GO:0005093	Rab GDP-dissociation inhibitor activity	44344	6	301	2	0.333333	0.000676548	3.1697	0.0216748	GDIA_MOUSE,GDIB_MOUSE	Gdi1,Gdi2	4	MF
GO:0004591	oxoglutarate dehydrogenase (succinyl-transferring) activity	44344	7	301	2	0.285714	0.000942919	3.02553	0.0257794	B2RXT3_MOUSE,ODO1_MOUSE	Ogdhl,Ogdh	4	MF
GO:0032794	GTPase activating protein binding	44344	53	384	5	0.0943396	9.67627e-05	4.01429	0.0104269	A0A1W2P6X3_MOUSE,GNAO_MOUSE,KCC2A_MOUSE,RHG35_MOUSE,TBB5_MOUSE	Fmnl1,Gnao1,Camk2a,Arhgap35,Tubb5	1	MF
GO:0004683	calmodulin-dependent protein kinase activity	44344	86	384	5	0.0581395	0.000930291	3.03138	0.0371083	KKCC1_MOUSE,KCC2A_MOUSE,A0A0G2JGS4_MOUSE,KKCC2_MOUSE,IP3KA_MOUSE	Camkk1,Camk2a,Camk2d,Camkk2,Itpka	1	MF
GO:0051015	actin filament binding	44344	789	384	16	0.0202788	0.00162319	2.78963	0.0431649	PICK1_MOUSE,FLII_MOUSE,A0A1W2P6X3_MOUSE,E9Q4K0_MOUSE,SHRM2_MOUSE,MYO1B_MOUSE,A0A1L1SQ51_MOUSE,DEST_MOUSE,SRC8_MOUSE,E9Q9C3_MOUSE,ARP3_MOUSE,ANXA6_MOUSE,VPS16_MOUSE,EF2_MOUSE,HIP1R_MOUSE,ARP2_MOUSE	Pick1,Flii,Fmnl1,Ablim2,Shroom2,Myo1b,Tln2,Dstn,Cttn,Afdn,Actr3,Anxa6,Vps16,Eef2,Hip1r,Actr2	1	MF
GO:0005516	calmodulin binding	44344	741	384	18	0.0242915	9.99661e-05	4.00015	0.0104269	RIT2_MOUSE,KKCC1_MOUSE,PDE1A_MOUSE,RGRF2_MOUSE,MAP6_MOUSE,GRM7_MOUSE,E9Q828_MOUSE,KCC2A_MOUSE,A3KGU9_MOUSE,A0A0G2JGS4_MOUSE,DDX5_MOUSE,MYO1B_MOUSE,A0A668KLC6_MOUSE,PLCB1_MOUSE,CNN3_MOUSE,KKCC2_MOUSE,CSKP_MOUSE,IP3KA_MOUSE	Rit2,Camkk1,Pde1a,Rasgrf2,Map6,Grm7,Atp2b4,Camk2a,Sptan1,Camk2d,Ddx5,Myo1b,Map2,Plcb1,Cnn3,Camkk2,Cask,Itpka	1	MF
GO:0001640	adenylate cyclase inhibiting G protein-coupled glutamate receptor activity	44344	24	384	3	0.125	0.00113923	2.94339	0.0371804	GRM1_MOUSE,GRM7_MOUSE,GRM5_MOUSE	Grm1,Grm7,Grm5	1	MF
GO:0046961	proton-transporting ATPase activity, rotational mechanism	44344	62	384	7	0.112903	1.12899e-06	5.94731	0.000312308	VATF_MOUSE,VATE1_MOUSE,VATH_MOUSE,VATC1_MOUSE,VPP1_MOUSE,ATPB_MOUSE,VATA_MOUSE	Atp6v1f,Atp6v1e1,Atp6v1h,Atp6v1c1,Atp6v0a1,Atp5f1b,Atp6v1a	1	MF
GO:0048306	calcium-dependent protein binding	44344	268	384	11	0.0410448	2.56109e-05	4.59158	0.00459716	SNP25_MOUSE,GRM7_MOUSE,TS101_MOUSE,E9Q828_MOUSE,DDX5_MOUSE,NRX1A_MOUSE,SC31A_MOUSE,ANXA6_MOUSE,SYN1_MOUSE,PDCD6_MOUSE,CPLX2_MOUSE	Snap25,Grm7,Tsg101,Atp2b4,Ddx5,Nrxn1,Sec31a,Anxa6,Syn1,Pdcd6,Cplx2	1	MF
GO:0047066	phospholipid-hydroperoxide glutathione peroxidase activity	44344	5	384	2	0.4	0.000735142	3.13363	0.0334625	GPX4_MOUSE,A0A0A6YY34_MOUSE	Gpx4,Gpx1	1	MF
GO:0099530	G protein-coupled receptor activity involved in regulation of postsynaptic membrane potential	44344	3	384	2	0.666667	0.000223095	3.65151	0.014562	GRM1_MOUSE,GRM5_MOUSE	Grm1,Grm5	1	MF
GO:0001639	PLC activating G protein-coupled glutamate receptor activity	44344	3	384	2	0.666667	0.000223095	3.65151	0.014562	GRM1_MOUSE,GRM5_MOUSE	Grm1,Grm5	1	MF
GO:0004619	phosphoglycerate mutase activity	44344	6	384	2	0.333333	0.00109639	2.96003	0.0371804	PMGE_MOUSE,PGAM1_MOUSE	Bpgm,Pgam1	1	MF
GO:0004082	bisphosphoglycerate mutase activity	44344	6	384	2	0.333333	0.00109639	2.96003	0.0371804	PMGE_MOUSE,PGAM1_MOUSE	Bpgm,Pgam1	1	MF
GO:0019905	syntaxin binding	44344	224	384	8	0.0357143	0.000806391	3.09345	0.0340582	E9PUQ5_MOUSE,SNP25_MOUSE,SNP47_MOUSE,TMEDA_MOUSE,NSF_MOUSE,A3KGU9_MOUSE,Q8BH40_MOUSE,G3X9Y1_MOUSE	Golga2,Snap25,Snap47,Tmed10,Nsf,Sptan1,Stx7,Syt3	1	MF
GO:0004029	aldehyde dehydrogenase (NAD+) activity	44344	33	384	4	0.121212	0.00018572	3.73114	0.014562	Q3U367_MOUSE,ALDH2_MOUSE,AL1L1_MOUSE,AL1A1_MOUSE	Aldh9a1,Aldh2,Aldh1l1,Aldh1a1	1	MF
GO:0051117	ATPase binding	44344	319	384	10	0.031348	0.000519489	3.28442	0.029223	AT1B1_MOUSE,RUVB1_MOUSE,E9QNT8_MOUSE,VATE1_MOUSE,UFD1_MOUSE,S4R2R5_MOUSE,VPP1_MOUSE,ARP3_MOUSE,UBE4B_MOUSE,RAB3A_MOUSE	Atp1b1,Ruvbl1,Ank1,Atp6v1e1,Ufd1,Ank2,Atp6v0a1,Actr3,Ube4b,Rab3a	1	MF
GO:0036435	K48-linked polyubiquitin modification-dependent protein binding	44344	20	384	3	0.15	0.00065834	3.18155	0.0334625	MINY1_MOUSE,UFD1_MOUSE,TERA_MOUSE	Mindy1,Ufd1,Vcp	1	MF
GO:0016018	cyclosporin A binding	44344	27	384	3	0.111111	0.00161504	2.79182	0.0431649	CANB1_MOUSE,PPIA_MOUSE,PPIF_MOUSE	Ppp3r1,Ppia,Ppif	1	MF
GO:0019899	enzyme binding	44344	1336	384	23	0.0172156	0.00156806	2.80464	0.0431649	PICK1_MOUSE,SIR3_MOUSE,MLEC_MOUSE,APOA1_MOUSE,E9QNT8_MOUSE,CBS_MOUSE,CHIP_MOUSE,CANB1_MOUSE,GRB2_MOUSE,RACK1_MOUSE,UBC9_MOUSE,Q3TGS7_MOUSE,VAPB_MOUSE,DDX5_MOUSE,GRP75_MOUSE,AT2A2_MOUSE,MAT2B_MOUSE,TB182_MOUSE,PLCB1_MOUSE,UBE4B_MOUSE,DHE3_MOUSE,SMAD3_MOUSE,1433B_MOUSE	Pick1,Sirt3,Mlec,Apoa1,Ank1,Cbs,Stub1,Ppp3r1,Grb2,Rack1,Ube2i,Snx12,Vapb,Ddx5,Hspa9,Atp2a2,Mat2b,Tnks1bp1,Plcb1,Ube4b,Glud1,Smad3,Ywhab	1	MF
GO:0031625	ubiquitin protein ligase binding	44344	1101	301	17	0.0154405	0.00156293	2.80606	0.0355421	E9PUD2_MOUSE,KAP3_MOUSE,CALR_MOUSE,DNM1L_MOUSE,PSA3_MOUSE,RRAGA_MOUSE,HSP7C_MOUSE,RL5_MOUSE,UCHL1_MOUSE,CH60_MOUSE,1433Z_MOUSE,TPIS_MOUSE,G6PI_MOUSE,TCPB_MOUSE,SH3K1_MOUSE,KAP0_MOUSE,QCR1_MOUSE	Dnm1l,Prkar2b,Calr,Dnm1l,Psma3,Rraga,Hspa8,Rpl5,Uchl1,Hspd1,Ywhaz,Tpi1,Gpi,Cct2,Sh3kbp1,Prkar1a,Uqcrc1	4	MF
GO:0000149	SNARE binding	44344	236	301	8	0.0338983	0.000228909	3.64034	0.0117125	KCNB1_MOUSE,STX1A_MOUSE,SYPH_MOUSE,STXB1_MOUSE,SNAB_MOUSE,STX12_MOUSE,SYT1_MOUSE,SYT5_MOUSE	Kcnb1,Stx1a,Syp,Stxbp1,Napb,Stx12,Syt1,Syt5	4	MF
GO:0030276	clathrin binding	44344	180	384	8	0.0444444	0.000188477	3.72474	0.014562	NCALD_MOUSE,SYT13_MOUSE,A0A1L1SQ51_MOUSE,PICAL_MOUSE,Q5SUH7_MOUSE,AP2B1_MOUSE,G3X9Y1_MOUSE,HIP1R_MOUSE	Ncald,Syt13,Tln2,Picalm,Clint1,Ap2b1,Syt3,Hip1r	1	MF
GO:0044877	protein-containing complex binding	44344	2103	384	41	0.019496	1.30491e-06	5.88442	0.000312308	KHDR1_MOUSE,LZTL1_MOUSE,E9PUQ5_MOUSE,GNAO_MOUSE,AP2A1_MOUSE,PP4C_MOUSE,UFD1_MOUSE,TS101_MOUSE,GRB2_MOUSE,Q91VB8_MOUSE,TMEDA_MOUSE,HOME1_MOUSE,Q8K1M3_MOUSE,NDUA8_MOUSE,NSF_MOUSE,A3KGU9_MOUSE,PZP_MOUSE,2ABA_MOUSE,RHG35_MOUSE,TBB5_MOUSE,NRX1A_MOUSE,AL1L1_MOUSE,AP2A2_MOUSE,Q8BH40_MOUSE,NDUF2_MOUSE,LIS1_MOUSE,OGT1_MOUSE,AP2B1_MOUSE,G5E902_MOUSE,CLUS_MOUSE,QCR6_MOUSE,KAPCA_MOUSE,TB182_MOUSE,ANXA6_MOUSE…	Khdrbs1,Lztfl1,Golga2,Gnao1,Ap2a1,Ppp4c,Ufd1,Tsg101,Grb2,Hba-a1,Tmed10,Homer1,Prkar2a,Ndufa8,Nsf,Sptan1,Pzp,Ppp2r2a,Arhgap35,Tubb5,Nrxn1,Aldh1l1,Ap2a2,Stx7,Ndufaf2,Pafah1b1,Ogt,Ap2b1,Slc25a3,Clu,Uqcrh,Prkaca,Tnks1bp1,Anxa6,Vcp,Mlc1,Ndufa9,Uba3,Hspa4,Ywhab,Cask	1	MF
GO:0004601	peroxidase activity	44344	59	384	4	0.0677966	0.0017309	2.76173	0.0443852	GPX4_MOUSE,PRDX5_MOUSE,A0A0A6YY34_MOUSE,Q6GT24_MOUSE	Gpx4,Prdx5,Gpx1,Prdx6	1	MF
GO:0031489	myosin V binding	44344	49	301	4	0.0816327	0.000346622	3.46014	0.0152019	G3UXT7_MOUSE,RAB14_MOUSE,RAB10_MOUSE,A2A7Z6_MOUSE	Fus,Rab14,Rab10,Rab3b	4	MF
GO:0019901	protein kinase binding	44344	1801	1336	80	0.0444198	0.00039592	3.40239	0.0363751	ACTBL_MOUSE,PP1G_MOUSE,A0A494B901_MOUSE,IKKB_MOUSE,A0A1W2P750_MOUSE,A0A5F8MPY3_MOUSE,RS7_MOUSE,RPTOR_MOUSE,E9QAQ5_MOUSE,B1AQF4_MOUSE,H3BIV5_MOUSE,CACB2_MOUSE,SI1L1_MOUSE,E9PYV1_MOUSE,PTEN_MOUSE,H3BKQ7_MOUSE,Q6AXB7_MOUSE,AAKG2_MOUSE,GRIA2_MOUSE,S12A5_MOUSE,KPCE_MOUSE,M3K5_MOUSE,CDC37_MOUSE,Q3TCR7_MOUSE,PTN11_MOUSE,G3UZJ2_MOUSE,GRIA1_MOUSE,MYPT2_MOUSE,WNK1_MOUSE,RYR2_MOUSE,OXSR1_MOUSE,A2AUX5_MOUSE,…	Actbl2,Ppp1cc,Rela,Ikbkb,Ppp1r12a,Ptk2,Rps7,Rptor,Gsk3b,Dusp3,Akap5,Cacnb2,Sipa1l1,Nr3c1,Pten,Ppp1r9a,Fmr1,Prkag2,Gria2,Slc12a5,Prkce,Map3k5,Cdc37,Dnm2,Ptpn11,Map2,Gria1,Ppp1r12b,Wnk1,Ryr2,Oxsr1,Dab2ip,Cyld,Ppp1r12c,Nrp1,Bcl2l1,Llgl1,Ap1b1,Map2k7,Ksr1,Rcc2,Nisch,Gskip,Apc,Rapgef2,Insr,Ppp1r12a,Ptpn23,Dnm1,Grin2a,Sorbs1,Brsk1,Jup,Smcr8,Taok1,Agap2,Ppme1,Ctbp2,Irs2,Ptpn5,Faf1,Arhgdia,Wars1,Acsl3,Ra…	3	MF
GO:0019904	protein domain specific binding	44344	1105	1336	58	0.0524887	3.84375e-05	4.41524	0.00722207	RNF41_MOUSE,NCK1_MOUSE,SRSF9_MOUSE,RB27A_MOUSE,PP1G_MOUSE,1433T_MOUSE,D9HP81_MOUSE,DBNL_MOUSE,D3YTL5_MOUSE,CHM2B_MOUSE,H3BIV5_MOUSE,CACB2_MOUSE,H3BKQ7_MOUSE,Q6AXB7_MOUSE,MYO1D_MOUSE,B9EHJ3_MOUSE,STRN_MOUSE,A2RSX9_MOUSE,M3K5_MOUSE,PTN11_MOUSE,STMN3_MOUSE,GRIA1_MOUSE,DDX6_MOUSE,ACTN2_MOUSE,CNOT9_MOUSE,NUMA1_MOUSE,IST1_MOUSE,SRP68_MOUSE,GNAI3_MOUSE,CRK_MOUSE,A2BEE9_MOUSE,NEDD4_MOUSE,A0A3B2WBH9_MOUSE…	Rnf41,Nck1,Srsf9,Rab27a,Ppp1cc,Ywhaq,Rims2,Dbnl,Capg,Chmp2b,Akap5,Cacnb2,Ppp1r9a,Fmr1,Myo1d,Tjp1,Strn,Arfip1,Map3k5,Ptpn11,Stmn3,Gria1,Ddx6,Actn2,Cnot9,Numa1,Ist1,Srp68,Gnai3,Crk,Dlg3,Nedd4,Tjp2,Ica1,Chmp1b1,Rab6a,Rcc2,Zmynd8,Khdrbs3,Insr,Csnk2b,Myh9,Unc13a,Vps11,Irs2,Faf1,Wars1,Kpnb1,Plxnd1,Acsl3,Trim9,Mpp5,Arfip2,Homer3,Stambp,Rab27b,Src,Lin7b	3	MF
GO:0008022	protein C-terminus binding	44344	811	1336	42	0.0517879	0.000559109	3.2525	0.0432574	A2A6M1_MOUSE,BCAM_MOUSE,PP1G_MOUSE,1433T_MOUSE,DAPK3_MOUSE,DBNL_MOUSE,A0A1C7ZMY3_MOUSE,H7BX09_MOUSE,H3BKQ7_MOUSE,B9EHJ3_MOUSE,SAE1_MOUSE,ITPR1_MOUSE,CDC37_MOUSE,MPDZ_MOUSE,IMA4_MOUSE,STMN3_MOUSE,GRIA1_MOUSE,NUMA1_MOUSE,A2BEE9_MOUSE,A0A0G2JDT9_MOUSE,A2AHJ7_MOUSE,NEDD4_MOUSE,MP2K7_MOUSE,KSR1_MOUSE,A0A3B2WBH9_MOUSE,A2A841_MOUSE,B1B0C7_MOUSE,F6W8Z8_MOUSE,PHB2_MOUSE,A0A0R4J0B8_MOUSE,TAOK1_MOUSE,SH3G1_…	Snf8,Bcam,Ppp1cc,Ywhaq,Dapk3,Dbnl,Shank2,Grip1,Ppp1r9a,Tjp1,Sae1,Itpr1,Cdc37,Mpdz,Kpna3,Stmn3,Gria1,Numa1,Dlg3,Lrrc7,Dgkz,Nedd4,Map2k7,Ksr1,Tjp2,Epb41,Hspg2,Dnm1,Phb2,Sh3gl3,Taok1,Sh3gl1,Rasgrf1,Homer3,Banf1,Pex5,Sdcbp,Cnrip1,Vta1,Src,Kcnj11,Msh2	3	MF
GO:0047485	protein N-terminus binding	44344	506	1336	31	0.0612648	0.000182666	3.73834	0.0206553	KLH13_MOUSE,A2A6M1_MOUSE,SMCA4_MOUSE,NCOR2_MOUSE,ZWINT_MOUSE,PP1G_MOUSE,1433T_MOUSE,A0A494B901_MOUSE,CSK21_MOUSE,PEX19_MOUSE,SNG3_MOUSE,CSK22_MOUSE,F6TRI8_MOUSE,SCFD1_MOUSE,EXOC4_MOUSE,HS71A_MOUSE,A2AUX5_MOUSE,A2A841_MOUSE,RAB6A_MOUSE,A2A484_MOUSE,PHB2_MOUSE,UN13A_MOUSE,KCIP2_MOUSE,A0A2I3BPP1_MOUSE,B7ZBV9_MOUSE,BAF_MOUSE,D3Z600_MOUSE,A2AKJ9_MOUSE,RS21_MOUSE,VPS25_MOUSE,CHMP6_MOUSE	Klhl13,Snf8,Smarca4,Ncor2,Zwint,Ppp1cc,Ywhaq,Rela,Csnk2a1,Pex19,Syngr3,Csnk2a2,Fez1,Scfd1,Exoc4,Hspa1a,Dab2ip,Epb41,Rab6a,Zmynd8,Phb2,Unc13a,Kcnip2,Tsc2,Kcnq2,Banf1,Pex5,Sdcbp,Rps21,Vps25,Chmp6	3	MF
GO:0034237	protein kinase A regulatory subunit binding	44344	72	1336	8	0.111111	0.00144355	2.84057	0.0757865	AKAP8_MOUSE,WASF2_MOUSE,PJA2_MOUSE,H3BIV5_MOUSE,BIG2_MOUSE,RYR2_MOUSE,GSKIP_MOUSE,GCP60_MOUSE	Akap8,Wasf2,Pja2,Akap5,Arfgef2,Ryr2,Gskip,Acbd3	3	MF
GO:0042802	identical protein binding	44344	5485	1336	233	0.0424795	3.14108e-08	7.50292	1.53913e-05	HOOK1_MOUSE,A2AWI7_MOUSE,CRYAB_MOUSE,DACT3_MOUSE,BTBD1_MOUSE,RNF41_MOUSE,D6RIL1_MOUSE,SERB_MOUSE,CCDC6_MOUSE,F6W7I2_MOUSE,LUC7L_MOUSE,1433T_MOUSE,ZDH17_MOUSE,TBK1_MOUSE,PAPD1_MOUSE,DAPK3_MOUSE,E9QAI5_MOUSE,A0A494B901_MOUSE,RBM10_MOUSE,G3X907_MOUSE,CLD10_MOUSE,TSN_MOUSE,BLMH_MOUSE,Q60709_MOUSE,UBQL2_MOUSE,E9QK34_MOUSE,WRIP1_MOUSE,A0A1W2P7K6_MOUSE,SGTA_MOUSE,JAM3_MOUSE,LNP_MOUSE,FA98B_MOUSE,IKKB_MO…	Hook1,Sh3glb2,Cryab,Dact3,Btbd1,Rnf41,Nr3c2,Psph,Ccdc6,Dhps,Luc7l,Ywhaq,Zdhhc17,Tbk1,Mtpap,Dapk3,Cad,Rela,Rbm10,Tenm3,Cldn10,Tsn,Blmh,Aplp2,Ubqln2,Nlgn1,Wrnip1,Rab3ip,Sgta,Jam3,Lnpk,Fam98b,Ikbkb,Nudt5,Nol3,Tpm4,Ptk2,Rprd1a,Txnrd1,Sdc4,Csnk2a1,Snrnp200,Mri1,Dynlt3,Gcc2,Dpp9,Eif4g1,Vac14,Ctps2,Acadl,Arl6ip1,Cacnb2,Eif3f,Ssbp1,Nr3c1,Diaph1,Sord,Tnpo3,P4ha1,Dync1li1,Pdcd6ip,Pten,Ppp1r9a,Fmr1,Fsd1,Uba…	3	MF
GO:0017124	SH3 domain binding	44344	474	1336	28	0.0590717	0.000645444	3.19014	0.0474402	CCDC6_MOUSE,WASF2_MOUSE,QKI_MOUSE,DEN1A_MOUSE,DOCK3_MOUSE,H3BIV5_MOUSE,AUXI_MOUSE,A0A1C7ZMY3_MOUSE,PLS3_MOUSE,PDC6I_MOUSE,CTTB2_MOUSE,LANC1_MOUSE,KPCE_MOUSE,Q3TCR7_MOUSE,A2AI52_MOUSE,SOS1_MOUSE,A2AUX5_MOUSE,CRK_MOUSE,WIPF3_MOUSE,KHDR3_MOUSE,F6W8Z8_MOUSE,CNTP1_MOUSE,SH3G1_MOUSE,ELMO2_MOUSE,PTN12_MOUSE,A0A494BA97_MOUSE,CBL_MOUSE,RIMS1_MOUSE	Ccdc6,Wasf2,Qki,Dennd1a,Dock3,Akap5,Dnajc6,Shank2,Plscr3,Pdcd6ip,Cttnbp2,Lancl1,Prkce,Dnm2,Usp8,Sos1,Dab2ip,Crk,Wipf3,Khdrbs3,Dnm1,Cntnap1,Sh3gl1,Elmo2,Ptpn12,Ostf1,Cbl,Rims1	3	MF
GO:0000287	magnesium ion binding	44344	717	1336	41	0.0571827	8.50887e-05	4.07013	0.0138978	PGM2_MOUSE,SERB_MOUSE,B2RQ57_MOUSE,PAPD1_MOUSE,STK11_MOUSE,Q99NF7_MOUSE,A2ATT5_MOUSE,5NT3B_MOUSE,ST38L_MOUSE,GSH1_MOUSE,DHX36_MOUSE,PLS3_MOUSE,PRPS2_MOUSE,PGM1_MOUSE,M3K5_MOUSE,IDHP_MOUSE,SAE2_MOUSE,KPRB_MOUSE,WNK1_MOUSE,OXSR1_MOUSE,IPYR_MOUSE,ARL3_MOUSE,PURA1_MOUSE,Q924B0_MOUSE,ENOG_MOUSE,Q5PR72_MOUSE,MP2K7_MOUSE,NUDT3_MOUSE,KPRA_MOUSE,HYES_MOUSE,BRSK1_MOUSE,GSHB_MOUSE,A0A1W2P8E1_MOUSE,A2AJQ0_MO…	Pgm2,Psph,Abl2,Mtpap,Stk11,Ppm1b,Nudt5,Nt5c3b,Stk38l,Gclc,Dhx36,Plscr3,Prps2,Pgm1,Map3k5,Idh2,Uba2,Prpsap2,Wnk1,Oxsr1,Ppa1,Arl3,Adss1,Impa1,Eno2,Pde2a,Map2k7,Nudt3,Prpsap1,Ephx2,Brsk1,Gss,Ilvbl,Pdp1,Dis3l2,Rheb,Lhpp,Sik3,Srr,Nudt16,Msh2	3	MF
GO:0019003	GDP binding	44344	165	1336	21	0.127273	3.04031e-08	7.51708	1.53913e-05	RB27A_MOUSE,RAB5C_MOUSE,RAB5B_MOUSE,SUCA_MOUSE,SRP54_MOUSE,DC1L1_MOUSE,PRPS2_MOUSE,RRAS_MOUSE,RRAS2_MOUSE,ARL3_MOUSE,A2CG35_MOUSE,Q3TXV4_MOUSE,GNAI3_MOUSE,RAB21_MOUSE,ARL8B_MOUSE,RAB9A_MOUSE,A2ARZ7_MOUSE,RHEB_MOUSE,MID51_MOUSE,RAB4A_MOUSE,RB27B_MOUSE	Rab27a,Rab5c,Rab5b,Suclg1,Srp54,Dync1li1,Prps2,Rras,Rras2,Arl3,Rab12,Rab31,Gnai3,Rab21,Arl8b,Rab9a,Rab22a,Rheb,Mief1,Rab4a,Rab27b	3	MF
GO:0004298	threonine-type endopeptidase activity	44344	27	1336	6	0.222222	0.000127103	3.89584	0.0173002	PSB4_MOUSE,PSB7_MOUSE,PSB2_MOUSE,PSA4_MOUSE,PSB3_MOUSE,PSB6_MOUSE	Psmb4,Psmb7,Psmb2,Psma4,Psmb3,Psmb6	3	MF
GO:0035254	glutamate receptor binding	44344	70	1336	9	0.128571	0.000248498	3.60468	0.0260923	H3BIV5_MOUSE,CP070_MOUSE,GRIA2_MOUSE,GRIA1_MOUSE,A2AI21_MOUSE,NMDE1_MOUSE,PTN5_MOUSE,RGRF1_MOUSE,PLCG1_MOUSE	Akap5,,Gria2,Gria1,Grin1,Grin2a,Ptpn5,Rasgrf1,Plcg1	3	MF
GO:0046875	ephrin receptor binding	44344	127	1336	11	0.0866142	0.00164451	2.78396	0.0805808	A2BDQ4_MOUSE,NCK1_MOUSE,SI1L1_MOUSE,EFNB3_MOUSE,NGEF_MOUSE,CRK_MOUSE,CHIN_MOUSE,EPHA4_MOUSE,CBL_MOUSE,A2AKJ9_MOUSE,SRC_MOUSE	Epha7,Nck1,Sipa1l1,Efnb3,Ngef,Crk,Chn1,Epha4,Cbl,Sdcbp,Src	3	MF
GO:0070122	isopeptidase activity	44344	30	1336	5	0.166667	0.00187483	2.72704	0.0889033	EIF3F_MOUSE,PRP8_MOUSE,EIF3H_MOUSE,STABP_MOUSE,CSN6_MOUSE	Eif3f,Prpf8,Eif3h,Stambp,Cops6	3	MF
GO:0004971	AMPA glutamate receptor activity	44344	14	1336	5	0.357143	3.93038e-05	4.40557	0.00722207	GRIA2_MOUSE,B0QZW1_MOUSE,GRIA1_MOUSE,GRIA3_MOUSE,GRIA4_MOUSE	Gria2,Gria3,Gria1,Gria3,Gria4	3	MF
GO:0004970	ionotropic glutamate receptor activity	44344	52	1336	8	0.153846	0.000154046	3.81235	0.0188707	GRIA2_MOUSE,B0QZW1_MOUSE,GRIA1_MOUSE,GRID1_MOUSE,A2AI21_MOUSE,NMDE1_MOUSE,GRIA3_MOUSE,GRIA4_MOUSE	Gria2,Gria3,Gria1,Grid1,Grin1,Grin2a,Gria3,Gria4	3	MF
GO:0003743	translation initiation factor activity	44344	182	1336	19	0.104396	2.9076e-06	5.53647	0.000712362	DHX29_MOUSE,E9Q9E1_MOUSE,EIF3F_MOUSE,EIF3I_MOUSE,EIF3C_MOUSE,EIF3G_MOUSE,EIF3A_MOUSE,DENR_MOUSE,E9PVC5_MOUSE,EIF3L_MOUSE,EIF3D_MOUSE,IF2P_MOUSE,EI3JB_MOUSE,IF6_MOUSE,EIF3H_MOUSE,IF5_MOUSE,IF2G_MOUSE,EI2BD_MOUSE,EIF2A_MOUSE	Dhx29,Eif4g1,Eif3f,Eif3i,Eif3c,Eif3g,Eif3a,Denr,Eif4g1,Eif3l,Eif3d,Eif5b,Eif3j2,Eif6,Eif3h,Eif5,Eif2s3x,Eif2b4,Eif2a	3	MF
GO:0019903	protein phosphatase binding	44344	415	1336	24	0.0578313	0.00199695	2.69963	0.0890957	PP1G_MOUSE,TBK1_MOUSE,IKKB_MOUSE,A0A5F8MPY3_MOUSE,Q6AXB7_MOUSE,P85B_MOUSE,A0A5F8MQ25_MOUSE,M3K5_MOUSE,ITPR1_MOUSE,Q78ZM0_MOUSE,PP6R1_MOUSE,A2BEE9_MOUSE,F7BX42_MOUSE,MP2K7_MOUSE,CADM4_MOUSE,SHOC2_MOUSE,INSR_MOUSE,PLAK_MOUSE,KIF3A_MOUSE,PPME1_MOUSE,IRS2_MOUSE,MTMR9_MOUSE,PPR3F_MOUSE,PP13G_MOUSE	Ppp1cc,Tbk1,Ikbkb,Ptk2,Fmr1,Pik3r2,Ppp6r2,Map3k5,Itpr1,Snx3,Ppp6r1,Dlg3,Nptxr,Map2k7,Cadm4,Shoc2,Insr,Jup,Kif3a,Ppme1,Irs2,Mtmr9,Ppp1r3f,Ppp1r3g	3	MF
GO:0050811	GABA receptor binding	44344	48	1336	7	0.145833	0.0005548	3.25586	0.0432574	H3BIV5_MOUSE,GBRL1_MOUSE,BIG2_MOUSE,D3Z4U5_MOUSE,GBRA5_MOUSE,SHSA7_MOUSE,PLCL2_MOUSE	Akap5,Gabarapl1,Arfgef2,Jakmip1,Gabra5,Shisa7,Plcl2	3	MF
GO:0071889	14-3-3 protein binding	44344	124	1336	11	0.0887097	0.001356	2.86774	0.0742579	1433T_MOUSE,FOXK1_MOUSE,A0A1W2P750_MOUSE,RPTOR_MOUSE,KPCE_MOUSE,A2AUX5_MOUSE,KSR1_MOUSE,MYPT1_MOUSE,IRS2_MOUSE,A0A2I3BPP1_MOUSE,RIPR1_MOUSE	Ywhaq,Foxk1,Ppp1r12a,Rptor,Prkce,Dab2ip,Ksr1,Ppp1r12a,Irs2,Tsc2,Ripor1	3	MF
GO:0016868	intramolecular transferase activity, phosphotransferases	44344	7	1336	3	0.428571	0.000871991	3.05949	0.0557316	PGM2_MOUSE,PGM1_MOUSE,PGM2L_MOUSE	Pgm2,Pgm1,Pgm2l1	3	MF
GO:0004427	inorganic diphosphatase activity	44344	8	1336	3	0.375	0.00136392	2.86521	0.0742579	IPYR_MOUSE,PRUN1_MOUSE,LHPP_MOUSE	Ppa1,Prune1,Lhpp	3	MF
GO:0003747	translation release factor activity	44344	8	1336	3	0.375	0.00136392	2.86521	0.0742579	ERF1_MOUSE,ERF3B_MOUSE,ERF3A_MOUSE	Etf1,Gspt2,Gspt1	3	MF
GO:0051082	unfolded protein binding	44344	239	1336	18	0.0753138	0.000375348	3.42557	0.0363751	CRYAB_MOUSE,Q6P8N8_MOUSE,NACAD_MOUSE,CALX_MOUSE,DNJA4_MOUSE,CDC37_MOUSE,AIP_MOUSE,HS71A_MOUSE,ERLEC_MOUSE,DNJB2_MOUSE,TCPA_MOUSE,TOM20_MOUSE,PFD5_MOUSE,NUDC3_MOUSE,DNJA2_MOUSE,GRPE1_MOUSE,HSP13_MOUSE,D3Z1Y1_MOUSE	Cryab,Clpx,Nacad,Canx,Dnaja4,Cdc37,Aip,Hspa1a,Erlec1,Dnajb2,Tcp1,Tomm20,Pfdn5,Nudcd3,Dnaja2,Grpel1,Hspa13,Syvn1	3	MF
GO:0035255	ionotropic glutamate receptor binding	44344	146	1336	12	0.0821918	0.00162076	2.79028	0.0805808	CCG8_MOUSE,E9QAQ5_MOUSE,A2ARP8_MOUSE,A0A1C7ZMY3_MOUSE,PTEN_MOUSE,CALX_MOUSE,SHSA7_MOUSE,A2BEE9_MOUSE,NEDD4_MOUSE,SNX27_MOUSE,FLOT1_MOUSE,RAB4A_MOUSE	Cacng8,Gsk3b,Map1a,Shank2,Pten,Canx,Shisa7,Dlg3,Nedd4,Snx27,Flot1,Rab4a	3	MF
GO:0001671	ATPase activator activity	44344	65	1336	8	0.123077	0.000732197	3.13537	0.0512538	DNJB2_MOUSE,RAB6A_MOUSE,AHSA2_MOUSE,DNJA2_MOUSE,D3Z5K6_MOUSE,GRPE1_MOUSE,AT1B3_MOUSE,RAB4A_MOUSE	Dnajb2,Rab6a,Ahsa2,Dnaja2,Dnajc19,Grpel1,Atp1b3,Rab4a	3	MF
GO:0048027	mRNA 5'-UTR binding	44344	70	557	5	0.0714286	0.00189962	2.72133	0.110178	Z4YJT3_MOUSE,DDX3X_MOUSE,CELF1_MOUSE,RS13_MOUSE,TCPE_MOUSE	Larp1,Ddx3x,Celf1,Rps13,Cct5	5	MF
GO:0031267	small GTPase binding	44344	923	557	30	0.0325027	2.83938e-06	5.54678	0.00247026	A2ALS7_MOUSE,INF2_MOUSE,D3YUG1_MOUSE,RFIP2_MOUSE,RAB8A_MOUSE,CYFP1_MOUSE,VPS4A_MOUSE,DOCK4_MOUSE,SODC_MOUSE,Q8CBB7_MOUSE,RBP2_MOUSE,D3YYH0_MOUSE,E9PUW7_MOUSE,BICD1_MOUSE,B7FAV1_MOUSE,NCKP1_MOUSE,LSM2_MOUSE,BRAF_MOUSE,EXOC5_MOUSE,IQGA2_MOUSE,F8VPK5_MOUSE,Q7TNB5_MOUSE,DAAM1_MOUSE,CYFP2_MOUSE,S4R2D2_MOUSE,HACE1_MOUSE,MYCB2_MOUSE,PROF1_MOUSE,A2AQW2_MOUSE,DP13B_MOUSE	Rap1gap,Inf2,Dennd10,Rab11fip2,Rab8a,Cyfip1,Vps4a,Dock4,Sod1,Ap1g1,Ranbp2,Pex5l,Xpo7,Bicd1,Flna,Nckap1,Lsm2,Braf,Exoc5,Iqgap2,Rock2,Gria1,Daam1,Cyfip2,Gga3,Hace1,Mycbp2,Pfn1,Fmnl2,Appl2	5	MF
GO:0043022	ribosome binding	44344	183	557	10	0.0546448	0.000117505	3.92994	0.0255574	LTMD1_MOUSE,ABCF1_MOUSE,LETM1_MOUSE,MTOR_MOUSE,GCN1_MOUSE,A0A0A0MQM0_MOUSE,A2ACG7_MOUSE,SHFL_MOUSE,IF2A_MOUSE,RSSA_MOUSE	Letmd1,Abcf1,Letm1,Mtor,Gcn1,Eif5a,Rpn2,Shfl,Eif2s1,Rpsa	5	MF
GO:0004471	malate dehydrogenase (decarboxylating) (NAD+) activity	44344	5	557	2	0.4	0.0015359	2.81364	0.0954455	MAON_MOUSE,MAOX_MOUSE	Me3,Me1	5	MF
GO:0004470	malic enzyme activity	44344	5	557	2	0.4	0.0015359	2.81364	0.0954455	MAON_MOUSE,MAOX_MOUSE	Me3,Me1	5	MF
GO:0004473	malate dehydrogenase (decarboxylating) (NADP+) activity	44344	5	557	2	0.4	0.0015359	2.81364	0.0954455	MAON_MOUSE,MAOX_MOUSE	Me3,Me1	5	MF
GO:0051087	chaperone binding	44344	290	557	14	0.0482759	2.18432e-05	4.66068	0.0095018	BAG4_MOUSE,BAG2_MOUSE,GET4_MOUSE,SDF2L_MOUSE,TIM10_MOUSE,BIN1_MOUSE,UBL4A_MOUSE,HSP72_MOUSE,TFR1_MOUSE,SODC_MOUSE,A0A2I3BQZ9_MOUSE,DNJB1_MOUSE,TSC1_MOUSE,E9QNY8_MOUSE	Bag4,Bag2,Get4,Sdf2l1,Timm10,Bin1,Ubl4a,Hspa2,Tfrc,Sod1,App,Dnajb1,Tsc1,Sacs	5	MF
GO:0031369	translation initiation factor binding	44344	88	557	6	0.0681818	0.00086793	3.06152	0.0751089	ZPR1_MOUSE,Z4YJT3_MOUSE,DDX3X_MOUSE,CELF1_MOUSE,EI2BE_MOUSE,RS3A_MOUSE	Zpr1,Larp1,Ddx3x,Celf1,Eif2b5,Rps3a	5	MF
GO:0003725	double-stranded RNA binding	44344	254	557	12	0.0472441	0.000102071	3.9911	0.0255574	AGO2_MOUSE,LYRIC_MOUSE,RM44_MOUSE,PRKRA_MOUSE,A1BN54_MOUSE,TFR1_MOUSE,HNRPU_MOUSE,ILF2_MOUSE,4F2_MOUSE,E9QNN1_MOUSE,A0A0G2JGL8_MOUSE,SIDT1_MOUSE	Ago2,Mtdh,Mrpl44,Prkra,Actn1,Tfrc,Hnrnpu,Ilf2,Slc3a2,Dhx9,Dhx30,Sidt1	5	MF
GO:0000774	adenyl-nucleotide exchange factor activity	44344	34	557	4	0.117647	0.000846991	3.07212	0.0751089	BAG4_MOUSE,BAG2_MOUSE,HPBP1_MOUSE,PROF1_MOUSE	Bag4,Bag2,Hspbp1,Pfn1	5	MF
GO:0016627	oxidoreductase activity, acting on the CH-CH group of donors	44344	60	557	5	0.0833333	0.000949652	3.02244	0.0751089	ACDSB_MOUSE,A0A140LIT2_MOUSE,A0A5F8MQC8_MOUSE,A0A0R4J0P1_MOUSE,D3Z7X0_MOUSE	Acadsb,Dhcr7,Tecr,Acad8,Acad12	5	MF
GO:0008753	NADPH dehydrogenase (quinone) activity	44344	3	557	2	0.666667	0.000468546	3.32925	0.0627443	NQO1_MOUSE,CBR4_MOUSE	Nqo1,Cbr4	5	MF
GO:0004329	formate-tetrahydrofolate ligase activity	44344	4	557	2	0.5	0.000929281	3.03185	0.0751089	C1TC_MOUSE,C1TM_MOUSE	Mthfd1,Mthfd1l	5	MF
GO:0003735	structural constituent of ribosome	44344	393	702	30	0.0763359	1.98946e-12	11.7013	2.06506e-09	RM13_MOUSE,RM28_MOUSE,RS9_MOUSE,RL29_MOUSE,RS27L_MOUSE,RL8_MOUSE,RS3_MOUSE,RL3_MOUSE,RM46_MOUSE,RL13A_MOUSE,Q9CQM8_MOUSE,RS8_MOUSE,RL9_MOUSE,RL32_MOUSE,RL11_MOUSE,RL13_MOUSE,RLA2_MOUSE,RL14_MOUSE,RS23_MOUSE,A0A3B2WDD2_MOUSE,RL26_MOUSE,RL23A_MOUSE,RS10_MOUSE,RL19_MOUSE,Q91V55_MOUSE,RL34_MOUSE,RT09_MOUSE,A0A1L1SQA8_MOUSE,RT63_MOUSE,RL35_MOUSE	Mrpl13,Mrpl28,Rps9,Rpl29,Rps27l,Rpl8,Rps3,Rpl3,Mrpl46,Rpl13a,Rpl21,Rps8,Rpl9,Rpl32,Rpl11,Rpl13,Rplp2,Rpl14,Rps23,Rpl10a,Rpl26,Rpl23a,Rps10,Rpl19,Rps5,Rpl34,Mrps9,Rps25,Mrpl57,Rpl35	2	MF
GO:0030544	Hsp70 protein binding	44344	159	702	11	0.0691824	5.04322e-05	4.29729	0.0174495	Q62347_MOUSE,A0A494BBG9_MOUSE,STIP1_MOUSE,F8WJK8_MOUSE,RS3_MOUSE,DNJC8_MOUSE,PPID_MOUSE,DNJA3_MOUSE,SYUA_MOUSE,E9Q9H2_MOUSE,DNJA1_MOUSE	Creb1,Fgf1,Stip1,St13,Rps3,Dnajc8,Ppid,Dnaja3,Snca,Dnajc2,Dnaja1	2	MF
GO:0071796	K6-linked polyubiquitin modification-dependent protein binding	44344	4	702	2	0.5	0.00147015	2.83264	0.117386	A0A498WFS2_MOUSE,MINY2_MOUSE	Ubxn1,Mindy2	2	MF
GO:0004756	selenide, water dikinase activity	44344	2	702	2	1	0.000250262	3.6016	0.0519544	SPS2_MOUSE,SPS1_MOUSE	Sephs2,Sephs1	2	MF
GO:0004821	histidine-tRNA ligase activity	44344	3	702	2	0.666667	0.000742885	3.12908	0.0898242	HARS1_MOUSE,G5E823_MOUSE	Hars1,Hars2	2	MF
GO:0099184	structural constituent of postsynaptic intermediate filament cytoskeleton	44344	3	702	2	0.666667	0.000742885	3.12908	0.0898242	AINX_MOUSE,NFH_MOUSE	Ina,Nefh	2	MF
GO:0031492	nucleosomal DNA binding	44344	34	702	4	0.117647	0.00198057	2.70321	0.137056	H33_MOUSE,RCC1_MOUSE,H2AY_MOUSE,H11_MOUSE	H3-3a,Rcc1,Macroh2a1,H1-1	2	MF
GO:0031210	phosphatidylcholine binding	44344	73	702	6	0.0821918	0.00106759	2.97159	0.0969948	ESYT1_MOUSE,PITM1_MOUSE,APOA4_MOUSE,CHMP3_MOUSE,SCRB2_MOUSE,PCY1A_MOUSE	Esyt1,Pitpnm1,Apoa4,Chmp3,Scarb2,Pcyt1a	2	MF
GO:0003723	RNA binding	44344	2187	702	67	0.0306356	2.42159e-07	6.6159	0.000125681	NUFP2_MOUSE,RU2B_MOUSE,RTRAF_MOUSE,E9PYZ7_MOUSE,MCES_MOUSE,KHDR2_MOUSE,RBM12_MOUSE,LSM4_MOUSE,CPSF6_MOUSE,PDIP3_MOUSE,LSM7_MOUSE,SMD3_MOUSE,B7ZCL7_MOUSE,SRSF3_MOUSE,RS27L_MOUSE,RALY_MOUSE,HNRPC_MOUSE,SMCE1_MOUSE,RL8_MOUSE,A0A0N4SV80_MOUSE,RS3_MOUSE,HNRLL_MOUSE,RL3_MOUSE,PCBP1_MOUSE,IF4G2_MOUSE,ENPL_MOUSE,MATR3_MOUSE,CAPR1_MOUSE,RBMX_MOUSE,RBM14_MOUSE,HTSF1_MOUSE,CSDE1_MOUSE,NUCL_MOUSE,NONO_MOUSE,…	Nufip2,Snrpb2,RTRAF,Rbm26,Rnmt,Khdrbs2,Rbm12,Lsm4,Cpsf6,Poldip3,Lsm7,Snrpd3,Dkc1,Srsf3,Rps27l,Raly,Hnrnpc,Smarce1,Rpl8,Zfp638,Rps3,Hnrnpll,Rpl3,Pcbp1,Eif4g2,Hsp90b1,Matr3,Caprin1,Rbmx,Rbm14,Htatsf1,Csde1,Ncl,Nono,Sart3,Pcp4,Elavl3,Rpl11,Rpl13,Paip1,Alyref,Rpl14,Srsf11,Hnrnpd,Ddx17,Larp4,Hnrnpdl,U2af1,Elavl1,Sf3a3,Rpl10a,Ddx25,Rpl26,Rps10,Rbfox2,Rpl19,FAM120A,Rps5,Trir,Mrps9,Hnrnpf,Srsf7,Dhx15,Ela…	2	MF
GO:0005178	integrin binding	44344	416	702	16	0.0384615	0.00112133	2.95027	0.0969948	EGFR_MOUSE,X3CL1_MOUSE,Q542I8_MOUSE,A0A494BBG9_MOUSE,LYN_MOUSE,TLN1_MOUSE,LAMB2_MOUSE,PLSL_MOUSE,GFAP_MOUSE,DMD_MOUSE,ISG15_MOUSE,LAMA5_MOUSE,PTN_MOUSE,A0A087WS56_MOUSE,A2AKI5_MOUSE,ICAM5_MOUSE	Egfr,Cx3cl1,Itgb2,Fgf1,Lyn,Tln1,Lamb2,Lcp1,Gfap,Dmd,Isg15,Lama5,Ptn,Fn1,Itgav,Icam5	2	MF
GO:0071987	WD40-repeat domain binding	44344	11	527	3	0.272727	0.000256505	3.5909	0.0276385	TCPZ_MOUSE,DDB1_MOUSE,A0A1L1SV73_MOUSE	Cct6a,Ddb1,Usp47	6	MF
GO:0008017	microtubule binding	44344	953	527	26	0.0272823	9.3695e-05	4.02828	0.0134609	MTUS2_MOUSE,A0A3B2WC92_MOUSE,NDEL1_MOUSE,RGS14_MOUSE,A0A0A6YW53_MOUSE,GA2L1_MOUSE,AKAP1_MOUSE,SGIP1_MOUSE,CKAP5_MOUSE,SNPH_MOUSE,OPA1_MOUSE,NF1_MOUSE,MLP3A_MOUSE,G3UW47_MOUSE,H7BX08_MOUSE,PPP5_MOUSE,D3YYK8_MOUSE,E9PZ43_MOUSE,A0A0A0MQE5_MOUSE,D3YXK0_MOUSE,MARE3_MOUSE,DCLK2_MOUSE,DPYL2_MOUSE,A0A0A0MQC7_MOUSE,CLIP3_MOUSE,A0A6I8MX08_MOUSE	Mtus2,Spast,Ndel1,Rgs14,Map4k4,Gas2l1,Akap1,Sgip1,Ckap5,Snph,Opa1,Nf1,Map1lc3a,Kif1a,Camsap2,Ppp5c,Mapre2,Map4,Camsap1,Jakmip2,Mapre3,Dclk2,Dpysl2,Mapt,Clip3,Ccdc88a	6	MF
GO:0097621	monoamine oxidase activity	44344	5	527	2	0.4	0.00137664	2.86118	0.0624562	E9Q3X6_MOUSE,AOFA_MOUSE	Maob,Maoa	6	MF
GO:0016309	1-phosphatidylinositol-5-phosphate 4-kinase activity	44344	5	527	2	0.4	0.00137664	2.86118	0.0624562	PI42B_MOUSE,PI42C_MOUSE	Pip4k2b,Pip4k2c	6	MF
GO:0003756	protein disulfide isomerase activity	44344	37	527	4	0.108108	0.000954581	3.02019	0.0548566	ERO1A_MOUSE,E9PXX7_MOUSE,ERP44_MOUSE,CREL2_MOUSE	Ero1a,Txndc5,Erp44,Creld2	6	MF
GO:0000062	fatty-acyl-CoA binding	44344	68	527	5	0.0735294	0.00131014	2.88268	0.0624562	SCP2_MOUSE,E9PYH2_MOUSE,HMGCL_MOUSE,PIPNA_MOUSE,ACBD6_MOUSE	Scp2,Acot7,Hmgcl,Pitpna,Acbd6	6	MF
GO:0048487	beta-tubulin binding	44344	116	527	7	0.0603448	0.000492189	3.30787	0.0401149	A0A3B2WC92_MOUSE,NDEL1_MOUSE,B1AR74_MOUSE,AKAP1_MOUSE,PDCD5_MOUSE,LPPRC_MOUSE,A2AMW0_MOUSE	Spast,Ndel1,Bcas3,Akap1,Pdcd5,Lrpprc,Capzb	6	MF
GO:0005096	GTPase activator activity	44344	892	527	23	0.0257848	0.000511908	3.29081	0.0401149	D3Z3S1_MOUSE,A0A0J9YUM2_MOUSE,SMAP2_MOUSE,RGS14_MOUSE,RHG17_MOUSE,RB3GP_MOUSE,A0A2C9F2A2_MOUSE,GNAQ_MOUSE,TBC24_MOUSE,PGAM5_MOUSE,SMAP1_MOUSE,NF1_MOUSE,BCR_MOUSE,RPGP1_MOUSE,E9Q1S3_MOUSE,E9QN14_MOUSE,OCRL_MOUSE,RHG05_MOUSE,RASA3_MOUSE,ARHGC_MOUSE,E9PX52_MOUSE,E9Q1W7_MOUSE,Q6NXL5_MOUSE	Preb,Syngap1,Smap2,Rgs14,Arhgap17,Rab3gap1,Rin1,Gnaq,Tbc1d24,Pgam5,Smap1,Nf1,Bcr,Rap1gap,Sec23a,Srgap3,Ocrl,Arhgap5,Rasa3,Arhgef12,Asap2,Tbck,Acap3	6	MF
GO:0005524	ATP binding	44344	4793	527	86	0.0179428	7.16196e-05	4.14497	0.0134609	MVD1_MOUSE,G3BP1_MOUSE,F6THK7_MOUSE,A0A3B2WC92_MOUSE,A0A1B0GT25_MOUSE,PYRG1_MOUSE,A2AJ26_MOUSE,A0A0A6YW53_MOUSE,MYLK_MOUSE,ENTP2_MOUSE,SYLM_MOUSE,SELO_MOUSE,AGK_MOUSE,SYTC_MOUSE,A0A0R4J0U5_MOUSE,PI42B_MOUSE,PDK1_MOUSE,ILK_MOUSE,CMPK2_MOUSE,PAK3_MOUSE,GEPH_MOUSE,F6U6X3_MOUSE,PRS8_MOUSE,A2ALL9_MOUSE,G3UW47_MOUSE,PUR4_MOUSE,PPP5_MOUSE,A0A3Q4EGR2_MOUSE,TCPZ_MOUSE,OLA1_MOUSE,BCR_MOUSE,EHD1_MOUSE,AT131…	Mvd,G3bp1,Irak1,Spast,Abcc8,Ctps1,Abca2,Map4k4,Mylk,Entpd2,Lars2,Selenoo,Agk,Tars1,Abcd2,Pip4k2b,Pdk1,Ilk,Cmpk2,Pak3,Gphn,Dyrk1a,Psmc5,Atp2b3,Kif1a,Pfas,Ppp5c,Rock1,Cct6a,Ola1,Bcr,Ehd1,Atp13a1,Smc1a,Mapk3,Hspe1,Psmc6,Afg3l2,Gsk3a,Ide,Abcd3,Vars1,Coq8a,Stk24,Kars,Ak5,Myo18a,Stk39,Elp1,Akt3,Qrsl1,Smchd1,Scn8a,Myo5a,Pip4k2c,Atp8a1,Gak,Qars,Dclk2,Atp2b2,Cct8,Mars1,Brsk2,Mark1,Ube2r2,Suclg2,Cdk14,Prkg…	6	MF
GO:0031406	carboxylic acid binding	44344	20	527	3	0.15	0.00163669	2.78603	0.0671821	HMGCL_MOUSE,AATC_MOUSE,6PGD_MOUSE	Hmgcl,Got1,Pgd	6	MF
GO:0043812	phosphatidylinositol-4-phosphate phosphatase activity	44344	16	527	3	0.1875	0.00083288	3.07942	0.0524237	FIG4_MOUSE,SAC1_MOUSE,F7BQW7_MOUSE	Fig4,Sacm1l,Synj1	6	MF
GO:0031687	A2A adenosine receptor binding	44344	5	527	2	0.4	0.00137664	2.86118	0.0624562	NECA2_MOUSE,TSNAX_MOUSE	Necab2,Tsnax	6	MF
GO:0016887	ATPase activity	44344	786	527	23	0.0292621	8.5083e-05	4.07016	0.0134609	A0A3B2WC92_MOUSE,A0A1B0GT25_MOUSE,A2AJ26_MOUSE,ENTP2_MOUSE,A0A0R4J0U5_MOUSE,PRS8_MOUSE,B0V2H4_MOUSE,G3UW47_MOUSE,TCPZ_MOUSE,OLA1_MOUSE,AT131_MOUSE,SMC1A_MOUSE,CH10_MOUSE,PRS10_MOUSE,IDE_MOUSE,ABCD3_MOUSE,SMHD1_MOUSE,AT8A1_MOUSE,TCPQ_MOUSE,ATP5J_MOUSE,DX39B_MOUSE,HS74L_MOUSE,AT1A2_MOUSE	Spast,Abcc8,Abca2,Entpd2,Abcd2,Psmc5,Atp6v1g2,Kif1a,Cct6a,Ola1,Atp13a1,Smc1a,Hspe1,Psmc6,Ide,Abcd3,Smchd1,Atp8a1,Cct8,Atp5pf,Ddx39b,Hspa4l,Atp1a2	6	MF
GO:0004032	alditol	44344	33	527	4	0.121212	0.000614018	3.21182	0.044107	G5E895_MOUSE,ARK72_MOUSE,ALDR_MOUSE,AKCL2_MOUSE	Akr1b10,Akr7a2,Akr1b1,Akr1e2	6	MF
GO:0031826	type 2A serotonin receptor binding	44344	10	527	3	0.3	0.000188211	3.72536	0.0231768	Q5F2D9_MOUSE,GNAQ_MOUSE,GNA11_MOUSE	Arrb2,Gnaq,Gna11	6	MF
GO:0004798	thymidylate kinase activity	44344	3	527	2	0.666667	0.000419581	3.37718	0.0401149	CMPK2_MOUSE,KTHY_MOUSE	Cmpk2,Dtymk	6	MF
